# Supplementary material for: Coxiella burnetii Transcriptional Analysis Reveals Serendipity Clusters of Regulation in Intracellular Bacteria
Source: PLoS One. 2010 Dec 21;5(12):e15321. doi: 10.1371/journal.pone.0015321 (PMC3006202; doi:10.1371/journal.pone.0015321)
Supplement: Table S3 — Statistical analysis of the distribution of differentially expressed genes. (XLS) [file pone.0015321.s008.xls]

## Sheet: Feuil1
		Nbr of regulated genes within clusters												Khi2 test
Genes within Clusters	Population	11	10	9	8	7	6	5	4	3	2	1	0	<n/2	>n/2	p(value)
11	Random	9.42506e-12	2.20231e-10	5.23422e-09	1.22223e-07	2.8021e-06	6.31453e-05	0.00140071	0.0305854	0.652528	13.1275	213.188	7733	227	6.6502e-05	1.70304e-19
	Observed	0	0	0	8	28	24	30	20	24	38	55	7733	167	60
10	Random		2.20231e-10	5.23422e-09	1.22223e-07	2.8021e-06	6.31453e-05	0.00140071	0.0305854	0.652528	13.1275	213.188	7733	227	6.6502e-05	9.17232e-17
	Observed		0	0	8	21	24	35	20	24	38	57	7733	174	53
9	Random			5.23422e-09	1.22223e-07	2.8021e-06	6.31453e-05	0.00140071	0.0305854	0.652528	13.1275	213.188	7733	226.999	0.00146721	1.56144e-32
	Observed			0	8	21	18	40	16	27	34	63	7733	140	87
8	Random				1.22223e-07	2.8021e-06	6.31453e-05	0.00140071	0.0305854	0.652528	13.1275	213.188	7733	226.999	0.00146721	3.68769e-28
	Observed				0	14	30	35	20	27	32	69	7733	148	79
7	Random					2.8021e-06	6.31453e-05	0.00140071	0.0305854	0.652528	13.1275	213.188	7733	226.968	0.0320526	7.62582e-31
	Observed					7	18	35	24	36	34	73	7733	143	84
6	Random						6.31453e-05	0.00140071	0.0305854	0.652528	13.1275	213.188	7733	226.968	0.0320526	2.2636e-30
	Observed						24	25	36	24	40	79	7733	143	84
5	Random							0.00140071	0.0305854	0.652528	13.1275	213.188	7733	226.315	0.68458	0
	Observed							40	24	39	46	80	7733	126	101
