# Supplementary material for: Coxiella burnetii Transcriptional Analysis Reveals Serendipity Clusters of Regulation in Intracellular Bacteria
Source: PLoS One. 2010 Dec 21;5(12):e15321. doi: 10.1371/journal.pone.0015321 (PMC3006202; doi:10.1371/journal.pone.0015321)
Supplement: Table S4 — Genes information. (XLS) [file pone.0015321.s009.xls]

## Sheet: Feuil1
sysName	locusId	accession	GI	scaffoldId	start	stop	strand			Microarray	Spotted sequence	N° promoteur	N° Operon	MicrobesOnline	String INFO - Genes associated (up to 10)	String INFO - Neighbourhood	String INFO - Gene fusion	String INFO - Cooccurence	String INFO - Coexpression	String INFO - Experiments	String INFO - Databases	String INFO - Textminng	String INFO - homology	String score - >0	String score - >250	String score - >500	String score - >750	String score - >900	String score - Mean	String score - Median	String score - Standart deviation	name	Description	COG	COGFun	COGDesc	GO	EC	ECDesc
CBU_0001	221057	NP_819057.1	29653365	7195	140	1495	+	1415	1465	Spotted	CGCAAAGTAAAAGAATTGCTTGCTACGTCGTTGGATATCTTAGAAGATTAT	1	1	operon	10	8	0	2	3	3	0	10	0	158	86	36	14	5	353.196	275	221.871	dnaA	chromosomal replication initiator protein DnaA (NCBI)	593	L	ATPase involved in DNA replication initiation	GO:0006270,GO:0006275,GO:0003688,GO:0017111,GO:0005524
CBU_0002	221058	NP_819058.1	29653366	7195	1639	2748	+	2657	2706	Spotted	TAACGTTTTCAACGGCCGATAGCAGCGTTTTAATCAACGAAGTTGAGAAT	1	1	operon	10	5	0	3	1	7	6	8	0	171	108	46	17	10	394.216	316	228.653	dnaN	DNA polymerase III, beta subunit (NCBI)	592	L	DNA polymerase sliding clamp subunit (PCNA homolog)	GO:0006260,GO:0003677,GO:0003893,GO:0008408,GO:0016449,GO:0019984,GO:0003889,GO:0003894,GO:0015999,GO:0016450,GO:0003890,GO:0003895,GO:0016000,GO:0016451,GO:0003891,GO:0016448,GO:0016452	2.7.7.7	DNA-directed DNA polymerase.
CBU_0003	221059	NP_819059.2	215918858	7195	2753	3826	+	3711	3760	Spotted	TAGTTAATTGTCTGGAATCTCAGGTGTTTATTTCGGGAATCGACCCCAAC	1	1	operon	10	5	0	5	0	2	0	9	0	111	57	24	7	3	346.396	260	208.468	recF	DNA replication and repair protein RecF (RefSeq)	1195	L	Recombinational DNA repair ATPase (RecF pathway)	GO:0006281,GO:0005694,GO:0003697,GO:0005524
CBU_0004	221060	NP_819060.2	215918859	7195	4122	6554	+	6105	6156	Spotted	GAACGGGAGTTGTATTTACCTATGGTTACGATTATTAATCATGGCATCGCAC	1	1	operon	10	9	2	3	0	2	2	9	0	168	95	20	5	5	313.25	264.5	168.694	gyrB	DNA gyrase subunit B (RefSeq)	187	L	Type IIA topoisomerase (DNA gyrase/topo II, topoisomerase IV), B subunit	GO:0006304,GO:0006265,GO:0005694,GO:0003918,GO:0005524	5.99.1.3	DNA topoisomerase (ATP-hydrolyzing).
CBU_0005					6636	6685		6636	6685	Spotted	ATTTCATTGGGCTACTTGTTGAAAACCTACACTTTCAATCGCACCCACTT	2		-	1	1	0	0	0	0	0	0	0	1	1	1	0	0	669	669	0
CBU_0006	221062	NP_819062.2	215918860	7195	6684	7778	+	7556	7605	Spotted	GATTAGTAAACGCGGCAATGTGATGTTAAGGACGTTATTGATTCATGGCG	3		-	4	4	0	0	0	0	0	0	0	1	1	1	0	0	669	669	0	CBU_0006	IS1111A transposase (RefSeq)	3547	L	Transposase and inactivated derivatives	GO:0006313,GO:0003677,GO:0004803
CBU_0006a	5437792	YP_002332938.1	215918861	7195	8047	7775	-					4		-	0	0	0	0	0	0	0	0	0									CBU_0006a	hypothetical protein (RefSeq)
CBU_0007	221063	NP_819063.1	29653371	7195	8398	8186	-	8283	8334	Spotted	AAGTGACGATACGGTTGGATGCAGAAACAATAAATTATTTTAAGCGTCTTGC	5	2	operon	3	3	0	0	0	0	0	0	0	3	3	0	0	0	448.333	466	30.5996	CBU_0007	hypothetical protein (NCBI)				GO:0045449
CBU_0007a	5437793	YP_002332939.1	215918862	7195	8688	8395	-					5	2	operon	0	0	0	0	0	0	0	0	0									CBU_0007a	hypothetical cytosolic protein (RefSeq)	2929	S	Uncharacterized protein conserved in bacteria
CBU_0008	221064	NP_819064.1	29653372	7195	8716	8904	+	8803	8852	Spotted	ACTAGTATCCCCATTTATCTATCATCGAATTGGCGTACAACAAATCCTCC	6		-	1	1	0	0	0	0	0	0	0	1	1	0	0	0	413	413	0	CBU_0008	hypothetical protein (NCBI)
CBU_0008a	5437794	YP_002332940.1	215918863	7195	9006	9560	+					7	3	operon	0	0	0	0	0	0	0	0	0									CBU_0008a	hypothetical protein (RefSeq)
CBU_0009	221065	NP_819065.1	29653373	7195	9560	10993	+	10944	10993	Spotted	ATCGTCTGTGCGAATTTCTGGTAAAATTTTCTGAGCGAAAACATGGATAA	7	3	operon	10	9	0	0	0	0	0	1	0	83	36	8	1	0	276.41	224	139.755	dacB	D-alanyl-D-alanine carboxypeptidase/D-alanyl-D-alanine-endopeptidase (NCBI)	2027	M	D-alanyl-D-alanine carboxypeptidase (penicillin-binding protein 4)	GO:0006508,GO:0009002	3.4.16.4,3.4.99.-	Serine-type D-Ala-D-Ala carboxypeptidase.,
CBU_0010	221066	NP_819066.1	29653374	7195	10986	11804	+	11755	11804	Spotted	TTTATCCTGATACCAATCCTGTTATCGAAATGCTTCAAGCTCATTTGTAA	7	3	operon	10	10	4	3	0	0	2	6	0	240	160	56	7	5	376.488	326	189.649	aroE	shikimate 5-dehydrogenase (NCBI)	169	E	Shikimate 5-dehydrogenase	GO:0005737,GO:0004764,GO:0050661	1.1.1.25	Shikimate dehydrogenase.
CBU_0011	221067	NP_819067.1	29653375	7195	11893	11997	+	11966	11997	Spotted	TCTTCTTCGAAGAACTGCTAAATTATTTATAA	8		-	2	2	0	0	0	0	0	0	0	2	2	2	0	0	614	614	0	CBU_0011	hypothetical protein (NCBI)
CBU_0012	221068			7195	12959	12148	-	12151	12200	Spotted	GTAATGATGAAGCGTTAGAAAGAGAGACCTTGACTACCTCAATGGGCCTC	9		-	2	2	1	0	0	0	0	0	0	6	6	1	1	1	435.667	329	255.928	CBU_0012	hypothetical protein (RefSeq)
CBU_0013					12614	12663		12614	12663	Spotted	AGAGTCAATACAGCAAGCGCTTGAGAGTAATGTTATTTCGCAAACAACGG	10		-	2	2	1	0	0	0	0	0	0	6	6	1	1	1	461	359	245.231
CBU_0014	221070	NP_819070.1	29653378	7195	14479	13226	-	13500	13549	Spotted	GGCATTGTGACAGGATTGACGATGTATGGTTATAAAGTAATCGCCACCAT	11		-	10	10	0	1	0	0	0	0	0	130	90	18	1	1	346.446	315.5	146.884	CBU_0014	phosphate transporter family protein (NCBI)	306	P	Phosphate/sulphate permeases	GO:0006817,GO:0016020,GO:0005315
CBU_0015	221071	NP_819071.2	215918864	7195	14556	15272	+	15087	15137	Spotted	GTAAACGATATCGAATACCAAACAGACCAATTGCAAATCGAATTGCGTCAA	12	4	operon	10	10	0	1	0	0	0	0	0	59	30	9	3	1	325.068	257	192.322	CBU_0015	hypothetical protein (RefSeq)	1392	P	Phosphate transport regulator (distant homolog of PhoU)
CBU_0016	221072	NP_819072.1	29653380	7195	15274	16095	+	16046	16095	Spotted	AAAGTCTTAAACAACTGGTTTTAGCTTTCATTCAACGTTATCGCTCATGA	12	4	operon	10	10	0	0	0	0	3	4	0	136	89	24	9	4	362.037	302.5	191.16	xapA	purine nucleoside phosphorylase (NCBI)	5	F	Purine nucleoside phosphorylase	GO:0006139,GO:0009116,GO:0004731	2.4.2.1	Purine-nucleoside phosphorylase.
CBU_0017	221073	NP_819073.1	29653381	7195	16092	16817	+	16695	16745	Spotted	TTCGAACAAGCCGTCCCCTATATTCAATTAATTAAAGATAAAATGGGCGCT	12	4	operon	10	8	0	1	0	0	5	3	0	177	106	36	8	4	354.271	296	191.134	deoC	deoxyribose-phosphate aldolase (NCBI)	274	F	Deoxyribose-phosphate aldolase	GO:0009264,GO:0005737,GO:0004139	4.1.2.4	Deoxyribose-phosphate aldolase.
CBU_0018	221074	NP_819074.1	29653382	7195	16901	17344	+	17255	17304	Spotted	AGATCAAAGCAATCTATGTTCAAAAGGAGGTTTACGGATTTTCGGCCCAG	13		-	4	4	0	0	0	0	0	0	0	6	6	3	0	0	483.667	550.5	169.389	CBU_0018	hypothetical protein (NCBI)
CBU_0019	221075	NP_819075.1	29653383	7195	17567	17457	-	17511	17560	Spotted	TATCATTAGCCACAAGCCACCGCGATTCCATTTTAAACTTTGTGATCTTC	14	5	operon	2	2	0	0	0	0	0	0	0	3	3	2	1	0	579	560	257.027	CBU_0019	hypothetical protein (NCBI)
CBU_0020	221076	NP_819076.2	215918865	7195	18126	17575	-	17844	17893	Spotted	GAATGAAGTAGAAGATCTTTATGTGGCTATACGTAATGCGTTTGACGACA	14	5	operon	7	7	0	2	0	0	0	0	0	23	12	4	1	0	331.174	263	183.802	CBU_0020	ribosomal subunit interface protein domain/'cold-shock' DNA-binding domain protein (RefSeq)	1544	J	Ribosome-associated protein Y (PSrp-1)	GO:0006355,GO:0003677
CBU_0021	221077	NP_819077.1	29653385	7195	18337	20766	+	20708	20759	Spotted	AGGAAACAGATGTAAATAAAGAATTGGATTTTGAGCCCATTGCTTCTTTCAC	15		-	10	3	0	7	0	0	0	0	0	45	13	6	0	0	268.467	202	147.541	CBU_0021	hypothetical protein (NCBI)
CBU_0022	221078	NP_819078.1	29653386	7195	21004	21813	+	21677	21726	Spotted	AAAGAACGGTTAAAGCTCTAGCGTCAGTACCAGAAGGTTTAGTGAAGCAC	16		-	1	1	0	0	0	0	0	0	0	3	3	0	0	0	379.667	338	77.4231	CBU_0022	hypothetical protein (NCBI)
CBU_0023	221079	NP_819079.2	215918866	7195	22331	21819	-	22034	22083	Spotted	CAAATTTAACGTTAAACATTACGAACGGGCTATCCTTTGCGCTTCTGACG	17		-	1	1	0	0	0	0	0	0	0	4	3	1	0	0	362.75	341.5	141.728	CBU_0023	hypothetical cytosolic protein (RefSeq)
CBU_0024	221080	NP_819080.1	29653388	7195	22665	22459	-	22612	22661	Spotted	TAGTCTTAACACGAACAAATGGTCAGGCTATAAAGATTGGGAACGAGGGT	18		-	2	2	0	0	0	0	0	0	0	29	8	2	0	0	240.552	211	113.581	csrA-1	carbon storage regulator (NCBI)	1551	T	Carbon storage regulator (could also regulate swarming and quorum sensing)	GO:0006109,GO:0016071,GO:0003723
CBU_0025	221081	NP_819081.1	29653389	7195	22883	22761	-	22786	22825	Spotted	CGCGTGAGTCCATCGAAAGTTATCGAGTCTTACGCGGAAT	19		-	2	2	0	0	0	0	0	0	0	4	4	2	0	0	475.5	468.5	113.867	CBU_0025	hypothetical protein (NCBI)
CBU_0026	221082	NP_819082.1	29653390	7195	23692	23030	-	23167	23216	Spotted	ATTCACAACGGATAACGGCAATGTGATTTTAGACATTCACAACCTGACCA	20		-	10	10	0	0	2	0	4	4	0	146	91	28	7	4	356.096	303	188.766	rpiA	ribose-5-phosphate isomerase A (NCBI)	120	G	Ribose 5-phosphate isomerase	GO:0009052,GO:0004751	5.3.1.6	Ribose-5-phosphate isomerase.
CBU_0027	221083	NP_819083.1	29653391	7195	24724	23834	-	23919	23968	Spotted	TTGCCACTAACTGAAGATCTTATCGGAAATTACTACGAAGACAGGACATT	21	6	operon	1	1	0	0	0	0	0	0	0	30	9	1	0	0	222.433	182	86.5733	CBU_0027	acyltransferase family protein (NCBI)	204	I	1-acyl-sn-glycerol-3-phosphate acyltransferase	GO:0008152,GO:0008415
CBU_0027a	5437795			7195	26438	24721	-					21	6	operon	0	0	0	0	0	0	0	0	0									CBU_0027a
CBU_0029	221084	NP_819084.2	215918867	7195	27103	26405	-	26826	26877	Spotted	GACGAGGGAAAATACCATTTTCGGCTAAATTAATGAATTTAATTGCGGTAGA	22	7	operon	10	9	1	1	0	1	0	1	0	116	65	20	3	0	323.664	265.5	165.613	CBU_0029	1-acyl-sn-glycerol-3-phosphate acyltransferase (RefSeq)	204	I	1-acyl-sn-glycerol-3-phosphate acyltransferase	GO:0008152,GO:0003841,GO:0008415	2.3.1.51	1-acylglycerol-3-phosphate O-acyltransferase.
CBU_0030	221085	NP_819085.1	29653393	7195	28277	27090	-	27358	27409	Spotted	GCGTCAGTGAAAATGCAGTCGCTTTCTTTGATATTTTATATTTGCCGGAATC	22	7	operon	7	3	0	3	0	0	4	0	1	28	10	6	5	2	338.25	205	270.062	CBU_0030	3-hydroxy-3-methylglutaryl Coenzyme A reductase (NCBI)	1257	I	Hydroxymethylglutaryl-CoA reductase	GO:0015936,GO:0004420,GO:0050662	1.1.1.34	Hydroxymethylglutaryl-CoA reductase (NADPH).
CBU_0031	221086	NP_819086.1	29653394	7195	29314	28376	-	28581	28630	Spotted	ATTGCTGTTGAATTTGCTGCCTATGGTATTCGTTCTAATCTTCTCCAACC	23		-	7	6	0	3	0	0	0	0	0	35	14	5	0	0	274.743	211	145.409	CBU_0031	oxidoreductase, short chain dehydrogenase/reductase family (NCBI)	1028	IQR	Dehydrogenases with different specificities (related to short-chain alcohol dehydrogenases)	GO:0008152,GO:0016491
CBU_0032	221087	NP_819087.1	29653395	7195	29546	29824	+	29782	29824	Spotted	CAACTCCTTGATATTCCCTCTTTACCTCGCTCTCTTAAGTTGA	24		-	3	3	0	0	0	0	0	0	0	3	3	1	0	0	462.667	410	91.2213	CBU_0032	hypothetical protein (NCBI)
CBU_0033	221088	NP_819088.1	29653396	7195	30618	29917	-	29988	30037	Spotted	ATCCAGTCGTGATCTTTCACATGTTCAAATTAGCTTATCTCATGACGGGC	25	8	operon	5	5	0	0	0	0	0	0	0	7	7	4	4	0	601.571	772	250.017	CBU_0033	hypothetical protein (NCBI)				GO:0009059,GO:0000287,GO:0008897
CBU_0034	221089	NP_819089.1	29653397	7195	30882	30622	-	30622	30671	Spotted	AAGATGCGGTTAATTTAATTTCGAGCCAAGTTAAAACTGTTGCTGTTTAA	25	8	operon	8	8	0	0	0	0	0	0	0	11	10	8	4	2	615	618	274.768	CBU_0034	acyl carrier protein (NCBI)				GO:0048037
CBU_0035	221090	NP_819090.1	29653398	7195	32179	30905	-	30989	31038	Spotted	TTCATCCTGAATTAGAAGTGTTTCAAGATCGAATTGTTCAGCGAACCCAA	25	8	operon	10	10	2	5	0	0	8	4	1	47	28	18	17	13	498.362	355	331.395	CBU_0035	beta-ketoacyl synthase (NCBI)	304	IQ	3-oxoacyl-(acyl-carrier-protein) synthase	GO:0009058,GO:0003824,GO:0004315	2.3.1.41	Beta-ketoacyl-acyl-carrier-protein synthase I.
CBU_0036	221091	NP_819091.1	29653399	7195	32655	32176	-	32336	32387	Spotted	CGAGAAACGAAGTGATGAATTTAGTGACTTTATTTACAGAGGCAAATGTTGA	25	8	operon	10	10	1	3	0	0	2	0	0	36	21	12	7	5	431.361	298	284.339	CBU_0036	(3R)-hydroxymyristoyl-(acyl-carrier-protein) dehydratase, putative (NCBI)	764	I	3-hydroxymyristoyl/3-hydroxydecanoyl-(acyl carrier protein) dehydratases		4.2.1.-
CBU_0037	221092	NP_819092.2	161511219	7195	33276	32659	-	32838	32887	Spotted	AGTGGTCCGTTACGAAGTTTCTATCCGACGTTATTCTCATCTGGAACAAC	25	8	operon	10	9	0	1	0	0	5	3	0	83	43	18	10	5	361.12	270	239.245	fabA	3-hydroxydecanoyl-(acyl carrier protein) dehydratase (NCBI)	764	I	3-hydroxymyristoyl/3-hydroxydecanoyl-(acyl carrier protein) dehydratases	GO:0008693	4.2.1.60	3-hydroxydecanoyl-[acyl-carrier-protein] dehydratase.
CBU_0037a	5437796	YP_002332941.1	215918868	7195	33230	33415	+					26		-	0	0	0	0	0	0	0	0	0									CBU_0037a	hypothetical protein (RefSeq)
CBU_0038	221093	NP_819093.1	29653401	7195	34457	33474	-	33515	33564	Spotted	ATGGGATTCATTTAAATCGAATGATCAAGTATTAATGAGCGTCGTCGGAG	27		-	10	9	0	3	0	0	10	0	1	41	27	19	15	11	528.122	461	321.005	CBU_0038	3-oxoacyl-(acyl-carrier-protein) synthase III, putative (NCBI)	332	I	3-oxoacyl-[acyl-carrier-protein] synthase III	GO:0004315	2.3.1.180,2.3.1.41	Beta-ketoacyl-acyl-carrier-protein synthase III.,Beta-ketoacyl-acyl-carrier-protein synthase I.
CBU_0039	221094	NP_819094.1	29653402	7195	36571	34538	-	34584	34633	Spotted	TCGGGTGGTTCAGAAGACCCTTTAAATTTATTTAAAGCTTTTCGAGGACG	28		-	10	10	0	0	3	0	0	1	0	132	87	15	2	0	333.652	323	146.769	prlC	oligopeptidase A (NCBI)	339	E	Zn-dependent oligopeptidases	GO:0006508,GO:0004222,GO:0008270,GO:0008944	3.4.24.70	Oligopeptidase A.
CBU_0040	221095	NP_819095.2	215918869	7195	36620	37714	+					29		-	2	2	0	0	0	0	0	0	0	7	7	1	0	0	363.429	291	143.67	CBU_0040	IS1111A transposase (RefSeq)	3547	L	Transposase and inactivated derivatives	GO:0006313,GO:0003677,GO:0004803
CBU_0040a	5437797	YP_002332942.1	215918870	7195	37983	37711	-					30		-	0	0	0	0	0	0	0	0	0									CBU_0040a	hypothetical protein (RefSeq)
CBU_0041	221096	NP_819096.1	29653404	7195	40220	38088	-	38140	38189	Spotted	ACCAGCCATTCACTAATTTCAAGTTCTTCCTTTTGGAAATTAAAGGCGCC	31		-	2	2	0	0	0	0	0	0	0	4	4	1	0	0	449.75	429.5	112.084	CBU_0041	hypothetical protein (NCBI)
CBU_0042	221097	NP_819097.2	215918871	7195	41383	40319	-	40377	40428	Spotted	GGCAAAGATTAGACGGTGAAACATTAAAATTAATTCCTTCATTAAATGCCCA	32		-	10	9	0	1	0	0	1	5	0	175	103	23	6	2	320.16	266	165.563	hemH	ferrochelatase (RefSeq)	276	H	Protoheme ferro-lyase (ferrochelatase)	GO:0006783,GO:0004325	4.99.1.1	Ferrochelatase.
CBU_0043	221098	NP_819098.1	29653406	7195	41407	42009	+	41945	41994	Spotted	TTAGTCATCGTGGTCAGGCTTTAGAGCAATTATCGACCGTTTTGACAGAG	33		-	10	10	2	0	1	0	0	0	0	215	151	50	4	2	377.46	344	172.556	CBU_0043	HAM1 protein (NCBI)	127	F	Xanthosine triphosphate pyrophosphatase	GO:0017111	3.6.1.15	Nucleoside-triphosphatase.
CBU_0044	221099	NP_819099.2	215918872	7195	42116	42871	+	42707	42756	Spotted	CAAGTGCAAACCCAAAACAATGCTTCTGCTTATGTGATGCCGCTTAATAC	34		-	2	2	0	0	0	0	0	0	0	4	3	1	0	0	392.75	400.5	168.031	CBU_0044	hypothetical protein (RefSeq)
CBU_0045	221100	NP_819100.1	29653408	7195	43528	42968	-	43199	43250	Spotted	AACCCTGCGTTTAATCGCTTTGTATTTGCATAATTACAAACGAACGCATATC	35		-	2	2	0	0	0	0	0	0	0	23	7	1	0	0	227.696	172	93.6436	CBU_0045	lipoprotein, putative (NCBI)	2885	M	Outer membrane protein and related peptidoglycan-associated (lipo)proteins	GO:0009279
CBU_0046	2209955			7195	44716	43576	-					36		-	0	0	0	0	0	0	0	0	0									CBU_0046
CBU_0047	2209956			7195	45645	44706	-					37		-	0	0	0	0	0	0	0	0	0									CBU_0047
CBU_0048	221101	NP_819101.2	215918873	7195	46627	45629	-	45797	45846	Spotted	TTAAATGCGATGGTTGCACGATACAACGCGCAAAAGTCACTTATATTTCC	38		-	6	6	0	0	0	0	0	0	0	66	21	3	0	0	240.152	209	104.331	CBU_0048	auxiliary transport protein, membrane fusion protein family (RefSeq)	1566	V	Multidrug resistance efflux pump	GO:0009306,GO:0016020,GO:0008565
CBU_0049	221102	NP_819102.1	29653410	7195	47973	46663	-	46748	46797	Spotted	GAGCACATCGAAATCATCAATCTTTCTTTGATCCAATCCAAAATCAAGTC	39		-	5	5	0	0	0	0	0	0	0	15	8	1	0	0	323.467	298	151.952	CBU_0049	hypothetical protein (NCBI)
CBU_0050	221103	NP_819103.1	29653411	7195	48768	48166	-	48166	48215	Spotted	ACTCGACGACTCCTCCCGGTTATGCTCAGTTAAAATTGAATGAATTTTAA	40		-	7	7	0	0	0	0	0	0	0	15	12	3	2	0	397.867	333	194.482	CBU_0050	hypothetical protein (NCBI)
CBU_0051	221104	NP_819104.2	215918874	7195	49377	48793	-	48950	48999	Spotted	GTTCCACGCAATCAACTAACCGAAGAAATTAAAGAAAAGTTAGTGTCCTG	41		-	6	6	0	0	0	0	0	0	0	15	11	5	2	0	415.4	362	211.596	CBU_0051	hypothetical protein (RefSeq)
CBU_0052					49376	49413		49376	49413	Spotted	TGGAGATACTGTATCCATGCATGTTATTGTTAAAACAT	42		-	6	6	0	0	0	0	0	0	0	14	11	5	2	0	427.714	368.5	213.933
CBU_0053	221106	NP_819106.1	29653414	7195	49486	50235	+	50186	50235	Spotted	TGAATAAGCATTTCTTGAACGTCGGTACTCAGATCATCGTGACACGCTAG	43		-	7	6	0	1	0	0	0	0	0	44	19	5	0	0	288.773	237.5	149.308	CBU_0053	enhanced entry protein EnhA, putative (NCBI)
CBU_0054	221107	NP_819107.1	29653415	7195	50305	50862	+	50758	50807	Spotted	ATATGGGCTCGACGTTCTTTGTTTTATTTCGAAAGAGATCCCTTATTGGT	44	9	operon	10	8	0	0	0	0	3	0	0	73	36	11	3	1	312.055	248	175.311	CBU_0054	chorismate--pyruvate lyase, putative (NCBI)	3161	H	4-hydroxybenzoate synthetase (chorismate lyase)		4.1.3.40,4.1.3.-	Chorismate lyase.,
CBU_0055	221108	NP_819108.1	29653416	7195	50855	51718	+	51559	51608	Spotted	CTGGTTTTATTTGGGATTGTTAGTAGCGTTAGGGTTAATGTGTTATCAGC	44	9	operon	10	7	0	5	0	0	1	5	0	185	121	33	6	3	352.443	309	176.637	ubiA	4-hydroxybenzoate octaprenyltransferase (NCBI)	382	H	4-hydroxybenzoate polyprenyltransferase and related prenyltransferases	GO:0009058,GO:0016021,GO:0004659	2.5.1.-
CBU_0056	221109	NP_819109.1	29653417	7195	51830	53680	+	53484	53533	Spotted	TTCACCAAAATGGCTGGTACAAAGTTTTATCGGGTCATTATTCCACTCGC	45		-	10	8	0	2	0	0	0	0	0	101	41	9	0	0	279.604	230	136.188	CBU_0056	outer membrane protein TolC, putative (NCBI)	1538	MU	Outer membrane protein	GO:0015031,GO:0019867,GO:0005215
CBU_0057	221110	NP_819110.1	29653418	7195	53728	53856	+	53755	53784	Spotted	TTCATCCCCGCATTCCCCTGTCATCCCCGC	46		-	6	6	0	0	0	0	0	0	0	14	12	3	0	0	429.714	378.5	177.676	CBU_0057	hypothetical protein (NCBI)
CBU_0058	221111	NP_819111.1	29653419	7195	53896	53988	+	53939	53988	Spotted	TAAGTATTGGGTCGAAAAGCAGCATGCGGTGCAAATTATCGGAAATTTAA	47		-	8	8	0	0	0	0	0	0	0	14	12	4	1	0	424.214	408	198.302	CBU_0058	hypothetical protein (NCBI)
CBU_0059	221112	NP_819112.1	29653420	7195	53967	54092	+	54043	54092	Spotted	TAGATTCGCCGTGGCGTGAGTATGGATTCAATTCTCTAGAGGATATTTAA	48		-	8	8	0	0	0	0	0	0	0	14	12	4	1	0	424.214	408	198.302	CBU_0059	hypothetical protein (NCBI)
CBU_0060	221113			7195	54234	55849	+	54305	54354	Spotted	CCTTGCGTTGGTGTTTTATGATGAGCTAAAGAAATGTGATGAACTAAAGA	49		-	5	5	1	0	0	0	0	0	0	14	8	4	1	1	379.929	293	216.887	CBU_0060	hypothetical protein (RefSeq)
CBU_0061					55547	55596		55547	55596	Spotted	GAAGATCGTTTGGATCAATTGATCGGTGCTGCTATCCAAAAGAAGGAAGC	50		-	4	4	1	0	0	0	0	0	0	14	8	2	2	1	353.643	254	234.086
CBU_0062	221115	NP_819115.1	29653423	7195	55870	57375	+	57309	57358	Spotted	CAATGCCAAAAGAATAGCTAGTGATAAGGACTTCAATTCAGAGGCGCCTC	51		-	4	4	0	0	0	0	0	0	0	40	11	2	1	0	242.875	195	128.549	CBU_0062	DnaJ domain protein (NCBI)				GO:0031072
CBU_0063	221116	NP_819116.2	215918875	7195	58668	57361	-	57361	57410	Spotted	ATAAACATATGCGATGGATCAGCCGTCAGTTAATTTCACCGAATTCGTAA	52		-	10	10	1	6	0	0	2	6	0	164	107	47	9	2	386.585	348	201.546	kdtA	3-deoxy-D-manno-octulosonic-acid transferase family protein (RefSeq)	1519	M	3-deoxy-D-manno-octulosonic-acid transferase	GO:0005975,GO:0009058,GO:0005529,GO:0016740	2.-.-.-
CBU_0064	221117	NP_819117.2	215918876	7195	58753	60678	+	60559	60608	Spotted	ACCGTCAAGTCTAAAGATAAAACGGAACAGCTTTTGGATATGCTCTTAGC	53		-	10	9	2	4	0	3	0	6	0	131	60	10	5	2	288.137	240	155.447	parE	topoisomerase IV subunit B (RefSeq)	187	L	Type IIA topoisomerase (DNA gyrase/topo II, topoisomerase IV), B subunit	GO:0006265,GO:0005694,GO:0003918,GO:0005524	5.99.1.-
CBU_0065	221118	NP_819118.1	29653426	7195	60867	61241	+	60894	60943	Spotted	GCCCTTGCCAAAGAAGCAAAATCGCACATTGAAGAAACGGATATCTATAC	54		-	10	2	0	0	0	0	0	0	1	55	36	9	1	1	334.436	284	161.884	CBU_0065	rhodanese domain protein (NCBI)	607	P	Rhodanese-related sulfurtransferase
CBU_0065a	5437798	YP_002332943.1	215918877	7195	61292	61636	+					55		-	0	0	0	0	0	0	0	0	0									CBU_0065a	hypothetical protein (RefSeq)
CBU_0066	221119	NP_819119.1	29653427	7195	62226	61633	-	62015	62057	Spotted	GCGAAGTCGATATAAGAATCGCACTATCAAAAGCGCTCGAAGT	56		-	10	9	0	1	0	1	2	2	0	171	114	29	2	2	353.175	326	161.277	CBU_0066	5-formyltetrahydrofolate cyclo-ligase family protein (NCBI)	212	H	5-formyltetrahydrofolate cyclo-ligase	GO:0009396,GO:0005524,GO:0030272	6.3.3.2	5-formyltetrahydrofolate cyclo-ligase.
CBU_0067	221120	NP_819120.1	29653428	7195	62758	62435	-	62455	62504	Spotted	TCAACGCATTCAAGATTTGCAACGGCGAATTGAAAATTTCCTGGAAACAA	57	10	operon	8	2	0	1	0	2	0	7	0	50	24	4	2	0	290.66	249.5	166.362	CBU_0067	hypothetical protein (NCBI)	3027	S	Uncharacterized protein conserved in bacteria
CBU_0068	221121	NP_819121.1	29653429	7195	62994	62755	-	62900	62951	Spotted	CGCTAGAACTCAGCGAGTTAGAATATCAAGTTGATCATTTATTGCGTTCTTT	57	10	operon	2	2	0	0	0	0	0	0	0	6	5	1	1	0	414.5	295	237.625	CBU_0068	hypothetical protein (NCBI)
CBU_0068a	5437799	YP_002332944.1	215918878	7195	63249	63082	-					58		-	0	0	0	0	0	0	0	0	0									CBU_0068a	hypothetical protein (RefSeq)
CBU_0069	221122			7195	63382	65545	+	63590	63639	Spotted	CTATGCGAAGAAGGTCATGGTCGGATGTCATTGAATGTTTATGGGAATGC	59		-	3	3	2	0	0	0	0	0	0	6	5	3	2	2	560	468	337.444	CBU_0069	hypothetical protein (RefSeq)
CBU_0070					64155	64204		64155	64204	Spotted	CCCTGGTTAGGTATTGAAATTAAGGAAAACGCATCAAAAGTTATTGACGT	60		-	3	3	2	0	0	0	0	0	0	6	5	3	2	2	562.5	475.5	343.111
CBU_0071					65272	65321		65272	65321	Spotted	ATCTTTGAATGATATGGATAGCGCTAAGAGTAACGTTGTGTTGGCTGGAG	60		-	3	3	2	8	0	0	0	0	1	33	21	12	2	2	432.303	370	253.597
CBU_0072	221125	NP_819125.1	29653433	7195	65611	66810	+	66519	66568	Spotted	TAGGCTGATAGAAAACCTGAAAGGAAACTTTAGTTTGCAACAAGCGGAGG	61		-	9	3	0	8	0	0	0	0	1	48	16	7	0	0	279.479	196	159.431	CBU_0072	ankyrin repeat domain protein (NCBI)
CBU_0073	221126	NP_819126.2	215918879	7195	68723	66900	-	66927	66976	Spotted	TTGACCAAACCCTAAGGGACTTATTACCGGCCAATGAATTAAACGATTGG	62		-	10	10	0	0	0	0	0	0	0	75	45	10	0	0	314.88	275	153.308	CBU_0073	peptidase, M24 family (RefSeq)	6	E	Xaa-Pro aminopeptidase	GO:0006508,GO:0006600,GO:0016980,GO:0008235,GO:0008451	3.4.11.9	Xaa-Pro aminopeptidase.
CBU_0074	221127	NP_819127.1	29653435	7195	69002	68781	-	68910	68959	Spotted	GAGGATCAAAACGGGATCATATCATTACCCACAAGTCACAGGCTTTCTTC	63		-	4	4	0	0	0	0	0	0	0	7	4	3	0	0	431.857	460	230.437	CBU_0074	hypothetical protein (NCBI)
CBU_0075	221128	NP_819128.1	29653436	7195	69001	70233	+	69395	69444	Spotted	CTATTGATGATATCCAATGCAATACGAATCATGCGCAGGTTACCTTTTCG	64	11	operon	10	7	0	4	0	0	3	3	2	69	30	9	4	3	317.203	223	198.879	ubiH	2-octaprenyl-6-methoxyphenol hydroxylase (NCBI)	654	HC	2-polyprenyl-6-methoxyphenol hydroxylase and related FAD-dependent oxidoreductases	GO:0006118,GO:0006725,GO:0006744,GO:0050660,GO:0016709	1.14.13.-
CBU_0076	221129	NP_819129.2	215918880	7195	70220	71458	+	71409	71458	Spotted	AAGTGAGCGAATTACCCAATTTAATTAACCACATGCCGTTATTTGCTTAA	64	11	operon	10	6	0	5	0	1	2	5	1	98	43	8	4	3	293.184	228	172.642	visC	ubiquinone biosynthesis hydroxylase, UbiH/UbiF/VisC/COQ6 family (RefSeq)	654	HC	2-polyprenyl-6-methoxyphenol hydroxylase and related FAD-dependent oxidoreductases	GO:0006118,GO:0006725,GO:0006744,GO:0050660,GO:0016709	1.14.13.-
CBU_0077	221130	NP_819130.1	29653438	7195	71573	72364	+	72177	72227	Spotted	TGTTGACTTTGCTTTTAAATTGGGTGAATTATCATGAAATGCAAATGCCAT	65		-	4	4	0	0	0	0	0	0	0	7	6	2	0	0	412.143	410	134.037	CBU_0077	hypothetical protein (NCBI)
CBU_0078					72452	72501		72452	72501	Spotted	TAATTATCCACAAGTCACAGCCATTTCAACTTTAGACTTCGTCATCCCCG	66		-	3	3	0	0	0	0	0	0	0	3	3	1	0	0	511.333	458	144.576
CBU_0079	221132			7195	72540	73528	+	72868	72919	Spotted	GGATCGTGAAACGTCGGAAAATAATCAAGAAAATGAGACAAAGGTTAGTAAG	67		-	4	4	0	0	0	0	0	0	0	8	6	2	0	0	390	336.5	176.015	CBU_0079	transcriptional regulator, putative (RefSeq)				GO:0045449,GO:0005634,GO:0030528
CBU_0080					73258	73309		73258	73309	Spotted	CCAAAGTTTAAGTTCGCCAATAACTGTTTCATCCGATCAGCCATTCACCTTT	68		-	3	3	0	0	0	0	0	0	0	8	4	2	0	0	345.75	232	217.666
CBU_0081	221134	NP_819134.1	29653442	7195	73564	75264	+	75215	75264	Spotted	AGGAAGCCGAAAACGTATCCCTTGAAAATGTCCTTTCTGTGTTTAGATGA	69	12	operon	10	7	0	0	0	0	3	0	0	226	152	64	12	0	393.46	352.5	192.399	proS	prolyl-tRNA synthetase (NCBI)	442	J	Prolyl-tRNA synthetase	GO:0006433,GO:0005737,GO:0004827,GO:0005524	6.1.1.15	Proline--tRNA ligase.
CBU_0082					75274	75323		75274	75323	Spotted	TAATACTATTGAACGCCTCAGTATGAAAGAAATCTCGGCCGTTGATGTCC	70	12	operon	2	2	0	0	0	0	0	0	0	5	4	1	0	0	381.2	276	181.999
CBU_0083	221136	NP_819136.2	215918881	7195	75261	75503	+	75461	75503	Spotted	CCAAGCCGCCTACGAAGAACAGCATCGTTACGATTGTAAATAA	71	12	operon	2	2	0	0	0	0	0	0	0	5	5	2	0	0	428	322	175.214	CBU_0083	hypothetical protein (RefSeq)
CBU_0084	221137	NP_819137.1	29653445	7195	75638	77554	+	77377	77426	Spotted	TCTGATTACGAATAGTTACATCGATTATGCCATTGTGAAACCCAATCGGG	72		-	7	6	0	3	0	0	0	0	1	44	11	1	0	0	246.068	210	107.071	CBU_0084	sulfatase domain protein (NCBI)	3083	R	Predicted hydrolase of alkaline phosphatase superfamily	GO:0008152,GO:0008484	3.1.6.-
CBU_0085	221138	NP_819138.1	29653446	7195	77808	77963	+	77889	77928	Spotted	TTTGGGCAAGATTTACAAGCCGGTGGTAAAGCCATTAGCC	73	13	operon	5	3	0	2	0	0	0	0	0	11	9	3	1	0	412.727	322	204.437	CBU_0085	entericidin, putative (NCBI)				GO:0009636,GO:0016020
CBU_0086	221139	NP_819139.1	29653447	7195	77974	78732	+	78632	78682	Spotted	TGATAGAAGACATTCGTTTAATTGAGGAAAATTTCTCATCGGAGATTGCAG	73	13	operon	7	7	0	0	0	0	0	0	0	23	14	4	1	0	336.652	269	188.102	CBU_0086	2-pyrone-4,6-dicarboxylic acid hydrolase, putative (NCBI)	3618	R	Predicted metal-dependent hydrolase of the TIM-barrel fold	GO:0008152,GO:0003824
CBU_0087	221140	NP_819140.2	215918882	7195	78747	80690	+	80616	80665	Spotted	AAATATGGCGCGCAGTTAGATAGGAATTCATTACAACAAGTACTTGAGGA	74		-	3	3	1	0	0	0	0	0	1	34	10	2	0	0	248.353	201.5	132.041	CBU_0087	phosphoglycerol transferase MdoB and related protein-like protein, alkaline phosphatase superfamily (RefSeq)	3083	R	Predicted hydrolase of alkaline phosphatase superfamily	GO:0008152,GO:0008484
CBU_0088	2209957			7195	80859	81674	+					75		-	0	0	0	0	0	0	0	0	0									CBU_0088
CBU_0089	221141	NP_819141.1	29653449	7195	81688	81783	+	81693	81727	Spotted	TACTAAAGAACGCGTCGGTGAGTATGCGGTGGCAC	76		-	0	0	0	0	0	0	0	0	0									CBU_0089	hypothetical protein (NCBI)
CBU_0089a	5437800	YP_002332945.1	215918883	7195	81905	82246	+					77		-	0	0	0	0	0	0	0	0	0									CBU_0089a	hypothetical protein (RefSeq)
CBU_0090	221142	NP_819142.2	215918884	7195	82485	83807	+	83537	83586	Spotted	TAAGTCCATCATTATGATGCACCGAGAAAACGGGTTATTTGGTATTGCGC	78	14	operon	10	9	1	3	2	1	0	4	0	164	95	21	9	4	331.085	291	181.286	tolB	TolB (RefSeq)	823	U	Periplasmic component of the Tol biopolymer transport system	GO:0006508,GO:0015031,GO:0042597,GO:0016020,GO:0004274
CBU_0091	221143	NP_819143.2	215918885	7195	83817	84404	+	84355	84404	Spotted	ACGCATGGAGGTTAAATCGTCGGGTTAATTTAATTTATGAGGCTTATTAA	78	14	operon	10	10	0	2	4	1	0	5	0	169	97	20	5	2	321.16	271	172.438	CBU_0091	putative peptidoglycan-associated lipoprotein (RefSeq)	2885	M	Outer membrane protein and related peptidoglycan-associated (lipo)proteins	GO:0009279,GO:0016021
CBU_0092	221144	NP_819144.2	215918886	7195	84391	85308	+	85127	85176	Spotted	AAAAGGTACTTGATGCGAAATTAAAATTAGCCATCATTGATGCGGAAGAC	78	14	operon	10	9	0	2	3	0	0	4	0	149	70	14	4	3	295.785	231	168.451	ybgF	tol-pal system protein YbgF (RefSeq)	1729	S	Uncharacterized protein conserved in bacteria	GO:0005488
CBU_0093	221145	NP_819145.1	29653453	7195	85311	85952	+	85767	85816	Spotted	TATGAGTGGGCAAAAGATATTATTAACCGTTACGATTTGATCTCGCGCGC	78	14	operon	10	10	0	1	0	0	0	0	0	116	78	24	4	2	377.164	346.5	175.508	CBU_0093	radical SAM domain protein (NCBI)	602	O	Organic radical activating enzymes	GO:0003824,GO:0051536
CBU_0094	221146	NP_819146.1	29653454	7195	86265	88844	+	88636	88685	Spotted	ATTATCAGCTCACGATCAGTGATGACGCGCTCGATTATTTATCAGAGCTG	79	15	operon	10	9	0	0	8	6	0	9	0	203	118	32	14	4	342.911	290	190.487	clpB	clpB protein (NCBI)	542	O	ATPases with chaperone activity, ATP-binding subunit	GO:0051085,GO:0005783,GO:0005515,GO:0005524,GO:0017111
CBU_0095	221147	NP_819147.1	29653455	7195	88841	89809	+	89672	89721	Spotted	ATGATCTTTACGATTGGTCTTTGGCTTTTCACCATTTTAACCTCCCGTCG	79	15	operon	10	10	0	0	0	0	0	3	0	131	89	18	2	0	345.069	323	155.394	CBU_0095	sodium/calcium antiporter family protein (NCBI)	530	P	Ca2+/Na+ antiporter	GO:0016021
CBU_0095a	5437801	YP_002332946.1	215918887	7195	91360	90968	-					80	16	operon	0	0	0	0	0	0	0	0	0									CBU_0095a	acetyltransferase (RefSeq)
CBU_0096	221148	NP_819148.1	29653456	7195	90968	89793	-	89793	89843	Spotted	CGCCAACGCATTTTAGGTCGTTTGGTTCTTTATATTAAGTACTGGATATAA	80	16	operon	10	10	0	1	0	0	0	1	0	126	67	7	1	0	286.183	261	123.802	clS	cardiolipin synthetase (NCBI)	1502	I	Phosphatidylserine/phosphatidylglycerophosphate/cardiolipin synthases and related enzymes	GO:0008152,GO:0003824	2.7.8.-
CBU_0097	221149	NP_819149.1	29653457	7195	91430	92194	+	92040	92089	Spotted	TGATTATAGCGCTGATTGCTTTTGATCCTCCGGATATTCTACTCGTCATT	81	17	operon	10	4	0	0	0	0	8	0	0	159	106	39	9	2	384.277	347	203.448	pssA	CDP-diacylglycerol--serineO-phosphatidyltransferase (NCBI)	1183	I	Phosphatidylserine synthase	GO:0006656,GO:0016020,GO:0003882	2.7.8.8	CDP-diacylglycerol--serine O-phosphatidyltransferase.
CBU_0098	221150	NP_819150.1	29653458	7195	92194	93018	+	92382	92431	Spotted	TAAAATCCAGTGGAAGGTAAAGGATGGCGATTTCGTTTCCTCCAATCAAG	81	17	operon	10	7	1	1	0	0	5	3	0	194	127	45	12	4	377.345	324	203.004	nadC	nicotinate-nucleotide pyrophosphorylase (NCBI)	157	H	Nicotinate-nucleotide pyrophosphorylase	GO:0009435,GO:0004514	2.4.2.19	Nicotinate-nucleotide diphosphorylase (carboxylating).
CBU_0098a	5437802	YP_002332947.1	215918888	7195	93033	93194	+					82		-	0	0	0	0	0	0	0	0	0									CBU_0098a	hypothetical protein (RefSeq)
CBU_0098b	5437803	YP_002332948.1	215918889	7195	93486	93692	+					83		-	0	0	0	0	0	0	0	0	0									CBU_0098b	hypothetical protein (RefSeq)
CBU_0099	221151	NP_819151.2	215918890	7195	93683	94162	+	94080	94129	Spotted	TCGTCTGTTTGGAGCAATTTGAGAACCGTTGGATTCTGAATTGGGTATTG	84	18	operon	2	2	0	0	0	0	0	0	0	23	7	2	1	0	251.087	182	163.802	sixA	phosphohistidine phosphatase SixA homolog (RefSeq)	2062	T	Phosphohistidine phosphatase SixA	GO:0008969	3.1.3.-
CBU_0100	221152	NP_819152.1	29653460	7195	94164	94565	+	94465	94516	Spotted	CGAGCATTTTCGATGGAAATCGCTATCAATTAATTTTATTTCCCGACTCTAT	84	18	operon	1	1	0	0	0	0	0	0	0	1	1	1	1	0	869	869	0	CBU_0100	lipoprotein, putative (NCBI)
CBU_0101	221153	NP_819153.1	29653461	7195	96129	94519	-	94543	94592	Spotted	CTCAGGCAAGAAACACTATTTTGCATCTTAATCCATCGCCAACAATGTCC	85		-	10	7	1	1	0	2	9	3	0	127	74	23	13	5	362.244	279	217.482	nadB	L-aspartate oxidase (NCBI)	29	H	Aspartate oxidase	GO:0006118,GO:0009435,GO:0005737,GO:0008734	1.4.3.16	L-aspartate oxidase.
CBU_0102	221154	NP_819154.2	215918891	7195	96363	96250	-	96252	96293	Spotted	GTTATGATCATTATTTTATCATCATAGGATTAAGCGACTCTT	86		-	2	2	0	0	0	0	0	0	0	2	2	2	1	0	718.5	718.5	212.839	CBU_0102	hypothetical protein (RefSeq)
CBU_0103	221155	NP_819155.1	29653463	7195	97840	96398	-	96515	96564	Spotted	GTAAAATGTTTCCGAAAGCCCAGTTTATGATTACCGGTCTTTTAGGCCCC	87		-	7	7	0	0	0	0	0	0	0	31	16	5	1	0	318.258	270	176.825	CBU_0103	peptidase, M20/M25/M40 family (NCBI)	624	E	Acetylornithine deacetylase/Succinyl-diaminopimelate desuccinylase and related deacylases	GO:0006508,GO:0008237
CBU_0103a	5437804			7195	99512	97918	-					88		-	0	0	0	0	0	0	0	0	0									CBU_0103a
CBU_0106	221156	NP_819156.1	29653464	7195	99613	99723	+	99653	99702	Spotted	CAATCGAGCCAATGCGCAATGGAATAATTATTGGCAAGAAAGAAAGGCAG	89		-	3	3	0	0	0	0	0	0	0	3	3	0	0	0	431	437	10.3923	CBU_0106	hypothetical protein (NCBI)
CBU_0107	221157	NP_819157.1	29653465	7195	100029	101084	+	101015	101064	Spotted	TTTAAACGAGAAAGGTTTACAAGTTGAGGTGCTGGGTTATGTCAGTGCAG	90	19	operon	7	7	1	2	1	1	0	2	0	35	14	4	2	2	308.514	234	205.979	CBU_0107	ABC transporter, ATP-binding protein (NCBI)	1135	P	ABC-type metal ion transport system, ATPase component	GO:0005524,GO:0016887
CBU_0108	221158	NP_819158.2	215918892	7195	101107	101709	+	101630	101679	Spotted	TTGCTGTTTTGATCGTTCTCGTCCAATTATTGCAGTACTTAGGCGATTGG	90	19	operon	10	10	1	2	5	1	0	3	1	112	58	14	2	2	312.339	256	163.709	CBU_0108	D-methionine ABC transporter, permease protein (RefSeq)	2011	P	ABC-type metal ion transport system, permease component	GO:0006810,GO:0016020,GO:0005215
CBU_0109	221159	NP_819159.1	29653467	7195	101721	102524	+	102162	102211	Spotted	AAGGCCCAATTAATTCAACTAAAGACTCACGTTACTATTAACGCCACCCC	90	19	operon	10	10	1	2	4	0	0	4	0	99	60	10	2	2	313.414	283	149.128	CBU_0109	ABC transporter, periplasmic substrate-binding protein (NCBI)	1464	P	ABC-type metal ion transport system, periplasmic component/surface antigen
CBU_0110	221160	NP_819160.2	215918893	7195	103020	102535	-	102639	102688	Spotted	TGATGGCGCCTCTTTTGATGTGATCAAATCCGAAAATACGATTCGTTGTT	91		-	0	0	0	0	0	0	0	0	0									CBU_0110	hypothetical protein (RefSeq)
CBU_0110a	5437805	YP_002332949.1	215918894	7195	103264	103067	-					92		-	0	0	0	0	0	0	0	0	0									CBU_0110a	hypothetical protein (RefSeq)
CBU_0111	221161	NP_819161.1	29653469	7195	103425	104615	+	104452	104501	Spotted	ATTTATTGCAGGAAGGGATTTACGTGGTTGGGTTTTCATATCCGGTTGTG	93	20	operon	10	6	0	1	1	1	6	5	1	109	50	18	9	2	323.138	237	209.95	kbl	2-amino-3-ketobutyrate coenzyme A ligase (NCBI)	156	H	7-keto-8-aminopelargonate synthetase and related enzymes	GO:0006544,GO:0009058,GO:0006563,GO:0004372,GO:0008890,GO:0016769,GO:0008483,GO:0030170	2.3.1.29	Glycine C-acetyltransferase.
CBU_0112	221162	NP_819162.1	29653470	7195	104657	105685	+	105590	105639	Spotted	ATCACGCATGAGTTTCCGATGAAGGATTTTCAACAAGCATTTGATGTAAT	93	20	operon	10	8	0	1	1	1	4	1	0	113	53	10	4	2	292.965	233	167.938	tdh	L-threonine 3-dehydrogenase (NCBI)	1063	ER	Threonine dehydrogenase and related Zn-dependent dehydrogenases	GO:0006567,GO:0008270,GO:0008743	1.1.1.103	L-threonine 3-dehydrogenase.
CBU_0113	221163	NP_819163.1	29653471	7195	105933	105721	-	105751	105800	Spotted	TGTTCACGACTTCTAAAGCTGAATCTGTTTCTTCTAAATCGGAGGAAGAA	94		-	1	1	0	0	0	0	0	0	0	5	5	1	0	0	433.2	383	111.17	CBU_0113	hypothetical protein (NCBI)
CBU_0114	221164	NP_819164.1	29653472	7195	106086	106568	+	106495	106544	Spotted	TACAGTCTGTAATCGGTCTGCTCAAAGAACAAGAAATTGGCCTTCCTCTC	95		-	10	10	0	0	1	0	0	0	0	85	54	15	0	0	337.988	309	150.623	CBU_0114	hypothetical protein (NCBI)	1666	S	Uncharacterized protein conserved in bacteria
CBU_0115	221165	NP_819165.2	215918895	7195	106726	107208	+	107004	107053	Spotted	ATTAGATCGCAGCGGTCGAATTTTAATTCCGCCGGTATTACGAGAATATG	96	21	operon	10	10	0	0	1	1	0	8	0	139	86	28	15	3	358.993	283	208.909	mraZ	cell division protein MraZ (RefSeq)	2001	S	Uncharacterized protein conserved in bacteria
CBU_0116	221166	NP_819166.1	29653474	7195	107214	108137	+	108023	108072	Spotted	TATAAAACACCGATTAAAACCCCTTGGTTCTCTGATCAGACCAACAGAGG	96	21	operon	10	10	0	0	1	0	0	8	0	217	144	48	15	4	376.862	322	196.958	CBU_0116	S-adenosyl-methyltransferase MraW (NCBI)	275	M	Predicted S-adenosylmethionine-dependent methyltransferase involved in cell envelope biogenesis	GO:0008168	2.1.1.-
CBU_0117	221167	NP_819167.1	29653475	7195	108134	108481	+	108432	108481	Spotted	CAAGTGCAAAGGAGGTCATTTTAGTTAATGCCGATGCGATGATTGAGTAA	96	21	operon	10	10	0	0	0	0	0	0	0	48	22	15	7	3	379.938	232	267.684	ftsL	cell division protein FtsL (NCBI)	3116	D	Cell division protein	GO:0007049,GO:0051301,GO:0016021
CBU_0118	221168	NP_819168.2	215918896	7195	108474	110132	+	109552	109601	Spotted	ATTATTACACTTTATTACACGCATTTGGTTTTGGTGAAAGAACCACGAGC	96	21	operon	10	10	0	4	1	3	1	9	0	185	107	33	18	10	366.962	295	225.145	pbpB	penicillin-binding protein (RefSeq)	768	M	Cell division protein FtsI/penicillin-binding protein 2	GO:0009273,GO:0008658,GO:0008955	2.4.1.129	Peptidoglycan glycosyltransferase.
CBU_0119	221169	NP_819169.2	215918897	7195	111513	110137	-	110322	110371	Spotted	TTATGACACACATTCCCAGATTGAAACATTGCTAAGCGGTCAAGGGTATG	97		-	3	3	0	0	0	0	0	0	0	6	6	2	2	2	2	2	2	CBU_0119	hypothetical protein (RefSeq)
CBU_0120					111459	111493		111459	111493	Spotted	GACGTCTTTACAACGGCCAGCCACTTCATCACTTC	98		-	3	3	0	0	0	0	0	0	0	6	6	2	0	0	502.5	437	145.221
CBU_0121	221171	NP_819171.1	29653479	7195	111773	111642	-	111692	111741	Spotted	CCTTACCACTCATCTTAAGGGGTTAAATTTGATAAATTCAACGAACGAGC	99		-	6	6	0	0	0	0	0	0	0	6	6	6	0	0	571.667	546	55.802	CBU_0121	hypothetical protein (NCBI)
CBU_0122	221172	NP_819172.1	29653480	7195	111785	112063	+	111972	112011	Spotted	TTTGGAAACACTGTCGCGAACCGGAAGAAGAGGAGAAATC	100		-	6	6	0	0	0	0	0	0	0	6	6	4	0	0	607.667	679.5	123.982	CBU_0122	hypothetical protein (NCBI)
CBU_0123	221173	NP_819173.1	29653481	7195	112114	113583	+	113031	113080	Spotted	TATCAGCAATTTGTTAGCGGTTTTGAGCGTGTTGTGTCTGTGTGAAATTC	101	22	operon	10	10	1	6	1	3	8	2	0	234	160	61	18	9	389.026	331.5	211.837	murE	UDP-N-acetylmuramoylalanyl-D-glutamate-2, 6-diaminopimelate ligase (NCBI)	769	M	UDP-N-acetylmuramyl tripeptide synthase	GO:0009252,GO:0008360,GO:0051301,GO:0005737,GO:0005524,GO:0016881,GO:0008765	6.3.2.13	UDP-N-acetylmuramoyl-L-alanyl-D-glutamate--2,6-diaminopimelate ligase.
CBU_0124	221174	NP_819174.1	29653482	7195	113580	114920	+	114382	114431	Spotted	AACTCGAAATTCAATTGCCCTTAATTGGTGTACATAATGTCGCTAACGCA	101	22	operon	10	10	2	8	1	0	4	0	2	174	111	35	18	6	371.506	293.5	213.028	murF	UDP-N-acetylmuramoylalanyl-D-glutamyl-2, 6-diaminopimelate--D-alanyl-D-alanyl ligase (NCBI)	770	M	UDP-N-acetylmuramyl pentapeptide synthase	GO:0009252,GO:0008360,GO:0051301,GO:0005737,GO:0005524,GO:0047480,GO:0008766	6.3.2.10,6.3.2.15	UDP-N-acetylmuramoyl-tripeptide--D-alanyl-D-alanine ligase.,Deleted entry.
CBU_0125	221175	NP_819175.1	29653483	7195	114925	116010	+	115941	115990	Spotted	CATCGTAAGATTTTGGATCATCACTTTTATCCTCGTCTTATGCGGCTTGG	101	22	operon	10	10	0	7	1	0	2	8	0	178	109	43	17	7	371.713	289	221.194	mraY	phospho-N-acetylmuramoyl-pentapeptide-transferase (NCBI)	472	M	UDP-N-acetylmuramyl pentapeptide phosphotransferase/UDP-N-acetylglucosamine-1-phosphate transferase	GO:0009252,GO:0016021,GO:0008963	2.7.8.13	Phospho-N-acetylmuramoyl-pentapeptide-transferase.
CBU_0126					116085	116114		116085	116114	Spotted	TTTGGAAGCCCCATCGCTCTTGTCTCTGGC	102		-	3	3	0	0	0	0	0	0	0	12	7	1	0	0	329.917	277.5	144.045
CBU_0127	221177	NP_819177.1	29653485	7195	116182	116301	+	116197	116221	Spotted	GTCGCTTATGGCCGAGACGCTTGCG	103		-	4	4	0	0	0	0	0	0	0	12	8	3	0	0	384.333	328.5	163.148	CBU_0127	hypothetical protein (NCBI)
CBU_0128	221178			7195	116369	117683	+	117221	117270	Spotted	GAATACGCTCAAAATATCGAACCTGATCTTCGCAAGAAATTGGACGTGGC	104		-	6	6	1	0	0	0	0	0	0	12	12	3	1	0	448.417	420.5	174.965	CBU_0128	hypothetical protein (RefSeq)
CBU_0129					117476	117525		117476	117525	Spotted	TTATAACCAACATTGCGACGCGCTAAAACAGCTTGATATATTGGGTCAGC	105		-	6	6	1	0	0	0	0	0	0	12	12	3	1	0	448.417	420.5	174.965
CBU_0130	221180	NP_819180.2	215918898	7195	117802	117981	+	117865	117897	Spotted	AGTAATTTGTTCATTCCCCTCTCTCGCTTGCGG	106		-	10	10	0	0	0	0	0	0	0	12	12	5	0	0	493.167	454	115.142	CBU_0130	hypothetical protein (RefSeq)
CBU_0131	221181	NP_819181.1	29653489	7195	118036	119364	+	119202	119251	Spotted	TATTAAACACGCTGATTCAATGAACGAAGCCGTCAAACGATCCACTCAAG	107	23	operon	10	9	0	8	2	0	3	9	2	173	110	37	18	10	381.405	305	227.762	murD	UDP-N-acetylmuramoylalanine--D-glutamate ligase (NCBI)	771	M	UDP-N-acetylmuramoylalanine-D-glutamate ligase	GO:0009252,GO:0051301,GO:0008360,GO:0005737,GO:0005524,GO:0008764	6.3.2.9	UDP-N-acetylmuramoyl-L-alanine--D-glutamate ligase.
CBU_0132	221182	NP_819182.1	29653490	7195	119364	120482	+	120396	120445	Spotted	TTTATCAGTTATGGTGGTAGCAGTTTGTTGATGAATTGCTTGGCGATCGG	107	23	operon	10	10	0	7	1	2	0	8	0	172	85	25	15	8	331.523	247.5	218.659	ftsW	cell division protein FtsW (NCBI)	772	D	Bacterial cell division membrane protein	GO:0007049,GO:0009252,GO:0051301,GO:0016021
CBU_0133	221183			7195	120534	122032	+	121273	121322	Spotted	GTTCAATACACCCAGTTCCTTTCTATGATAAGGTGATGGTCTTAAGTAGA	108		-	8	1	0	0	0	0	0	0	0	12	12	8	1	1	551.667	603	193.176	CBU_0133	hypothetical protein (RefSeq)
CBU_0134					121692	121742		121692	121742	Spotted	AATCCTTAGCTGAAGCTTTGAAATGTGCAATTCATTACAATCGAGTGTTTA	109		-	8	1	0	0	0	0	0	0	0	12	11	7	1	1	551.417	599	215.123
CBU_0135	221185	NP_819185.1	29653493	7195	122082	123158	+	123109	123158	Spotted	CCGTTCAGCGTGTCATTGCTCAATGTAAGAAATTTTATGCAGCTCGATAA	110	24	operon	10	10	0	7	3	1	2	7	0	213	145	47	18	10	383.962	312	213.225	murG	UDP-N-acetylglucosamine--N-acetylmuramyl- (pentapeptide) pyrophosphoryl-undecaprenol N-acetylglucosamine transferase (NCBI)	707	M	UDP-N-acetylglucosamine:LPS N-acetylglucosamine transferase	GO:0019277,GO:0030259,GO:0009276,GO:0050511,GO:0030246	2.4.1.227,2.4.1.-	acetylglucosaminyltransferase.,
CBU_0136	221186	NP_819186.1	29653494	7195	123145	124542	+	124290	124339	Spotted	TTTAGCGGAAACTGATTGGTTGGTTTTACTTGAAGTTTATAGTGCGGGCG	110	24	operon	10	10	1	8	3	0	2	1	2	210	131	44	16	8	371.567	296	209.787	murC	UDP-N-acetylmuramate--alanine ligase (NCBI)	773	M	UDP-N-acetylmuramate-alanine ligase	GO:0009252,GO:0051301,GO:0008360,GO:0005737,GO:0005524,GO:0008763	6.3.2.8	UDP-N-acetylmuramate--L-alanine ligase.
CBU_0137	221187	NP_819187.1	29653495	7195	124535	125485	+	125436	125485	Spotted	TCCATGGCATTCAACTTGTTAAAGAAGTGCATATTATTGGACGATCCTGA	110	24	operon	10	10	0	4	0	0	2	4	0	162	85	34	15	5	357.506	260.5	217.897	murB	UDP-N-acetylenolpyruvoylglucosamine reductase (NCBI)	812	M	UDP-N-acetylmuramate dehydrogenase	GO:0009252,GO:0008762,GO:0050660	1.1.1.158	UDP-N-acetylmuramate dehydrogenase.
CBU_0138	221188	NP_819188.1	29653496	7195	125485	126216	+	126157	126206	Spotted	CGAGTTGAACATGTTGATCTTCGATATTCAAATGGGTTGGCAATTCAGTG	110	24	operon	10	9	0	1	3	5	0	9	0	113	60	31	18	6	387.982	262	257.902	ftsQ	cell division protein FtsQ (NCBI)	1589	M	Cell division septal protein
CBU_0139	221189	NP_819189.1	29653497	7195	126833	126213	-	126350	126399	Spotted	ATTTTCTAAAGAGGCCTTAACGCACTCTTATCAAAATTGCCTGACCTTTC	111		-	10	10	0	0	0	0	0	0	0	97	61	19	0	0	329.67	280	153.885	CBU_0139	carbonic anhydrase (NCBI)	288	P	Carbonic anhydrase	GO:0015976,GO:0004089,GO:0008270	4.2.1.1	Carbonate dehydratase.
CBU_0140	221190	NP_819190.2	215918899	7195	127015	128256	+	128088	128137	Spotted	GTATGTTAACGGTTTGGCTGATGTTCGTGACAACCCTATTTATGCTACGG	112	25	operon	10	10	0	1	2	4	0	10	0	207	127	47	17	4	374.807	334	210.435	ftsA	cell division protein (RefSeq)	849	D	Actin-like ATPase involved in cell division	GO:0007049
CBU_0141	221191	NP_819191.2	215918900	7195	128257	129438	+	129304	129353	Spotted	CATCAATTGGATCGGCCGACTTATATGCGAAATCAAGAACCGTCTAAACG	112	25	operon	10	10	0	1	2	2	0	10	0	273	180	76	24	9	393.3	342	213.432	ftsZ	cell division protein (RefSeq)	206	D	Cell division GTPase	GO:0051258,GO:0005737,GO:0043234,GO:0003924,GO:0005525
CBU_0142	221192	NP_819192.1	29653500	7195	129598	130509	+	130437	130486	Spotted	TTGGGAAATTGTGACTTTCAAAGACCCCTCTGAATTACCCTTCGCCTATA	112	25	operon	10	10	1	4	0	0	2	6	0	161	107	45	12	4	403.031	360	212.582	lpxC	UDP-3-O-[3-hydroxymyristoyl] N-acetylglucosamine deacetylase (NCBI)	774	M	UDP-3-O-acyl-N-acetylglucosamine deacetylase	GO:0009245,GO:0008759	3.5.1.-
CBU_0143	221193	NP_819193.1	29653501	7195	130946	130815	-	130892	130941	Spotted	TCATTATCCACAAGTCACAGCCATTTCCATTTTAAACTTCGTGATCCCGC	113		-	2	2	0	0	0	0	0	0	0	2	2	2	0	0	641	641	0	CBU_0143	hypothetical protein (NCBI)
CBU_0144	221194			7195	131079	132364	+	131210	131261	Spotted	TGAACTGTTGAAATATTTCATCATTGCCAAAGAATATCATGTCTATCAGCCT	114		-	2	2	0	0	0	0	0	0	0	2	2	2	1	0	755	755	161.22	CBU_0144	hypothetical protein (RefSeq)
CBU_0145					132257	132306		132257	132306	Spotted	CTTTTATCACGGCAGGTAATAAGAATAATCGTGCGTTTAGCAGCGTCCAG	115		-	10	2	1	8	0	0	0	0	1	25	16	12	2	0	456.68	454	251.556
CBU_0146	221196	NP_819196.2	215918901	7195	132760	132416	-	132521	132570	Spotted	GTCATGTGATGAATATCTCGGGCAATACCTTGATTCTTCAACTCGACAGC	116		-	3	3	0	0	0	0	0	0	0	27	9	3	0	0	263.778	194	157.638	CBU_0146	hypothetical protein (RefSeq)
CBU_0147	221197	NP_819197.2	215918902	7195	132760	135510	+	135212	135261	Spotted	TATTCACGCAAATGCTCAAACGAATCAAATACGAATTAGCGGCGACTTTG	117	26	operon	10	6	0	1	0	5	0	8	0	248	163	64	12	3	380.871	336.5	197.208	secA	protein translocase subunit (RefSeq)	653	U	Preprotein translocase subunit SecA (ATPase, RNA helicase)	GO:0006605,GO:0017038,GO:0016020,GO:0003676,GO:0004386,GO:0005515,GO:0005524
CBU_0148	221198	NP_819198.1	29653506	7195	135489	135902	+	135706	135757	Spotted	TGAAAGTTCAGCATTGCTATGATGATTATGAGGTTACTTTAGAAGCGTGGCG	117	26	operon	10	10	0	0	0	0	0	1	0	93	41	9	2	1	287.849	232	155.651	mutT	mutator MutT protein (NCBI)	1051	F	ADP-ribose pyrophosphatase	GO:0016787	3.6.1.-
CBU_0149	221199	NP_819199.1	29653507	7195	135899	136045	+	135936	135978	Spotted	CGAGGCCGTCTGGTGTATTGTTGAAGAATACAAAACCTCACGG	117	26	operon	3	3	0	0	0	0	0	0	0	3	3	3	2	0	801.333	869	117.202	CBU_0149	hypothetical protein (NCBI)
CBU_0150	221200	NP_819200.2	215918903	7195	137082	136270	-	136275	136325	Spotted	ATACGAAGCAAATTGCCGAAGAAATTTCTTTCAAATTAAACTGCTGTCGAA	118		-	10	7	0	3	1	0	0	0	0	78	33	12	4	0	308.808	233	174.527	CBU_0150	hypothetical protein (RefSeq)	4582	S	Uncharacterized protein conserved in bacteria
CBU_0151	221201	NP_819201.1	29653509	7195	137943	137107	-	137125	137174	Spotted	ATATTAACCCTTATCGCTCCACAAACCCCACCTTTTCCGTTCAAAATCAC	119		-	10	10	0	1	0	0	0	0	0	94	48	17	3	0	325.5	258.5	177.819	CBU_0151	hypothetical protein (NCBI)	2904	S	Uncharacterized protein conserved in bacteria	GO:0019438,GO:0005737,GO:0003934,GO:0033739	1.7.1.13	PreQ(1) synthase.
CBU_0152	221202	NP_819202.1	29653510	7195	138563	137964	-	138081	138130	Spotted	ATCAACTTTCGGATCAACAAATTCAACTTATCCTACAATCACAGAGCCCG	120	27	operon	10	8	1	1	1	0	1	1	0	183	123	50	9	2	376.311	328	191.726	coaE	dephospho-CoA kinase (NCBI)	237	H	Dephospho-CoA kinase	GO:0004140,GO:0005524	2.7.1.24	Dephospho-CoA kinase.
CBU_0153	221203	NP_819203.1	29653511	7195	139434	138574	-	138574	138624	Spotted	AGCCTTTTGTCGGGTCCGGTTCTAATACACAAATTGATTTCTTATTTATAA	120	27	operon	10	10	0	3	0	0	0	4	0	159	101	39	9	4	371.063	323	199.215	pilD	type 4 prepilin peptidase PilD (NCBI)	1989	NOU	Type II secretory pathway, prepilin signal peptidase PulO and related peptidases	GO:0009367,GO:0008978	2.1.1.-,3.4.23.43,3.4.99.-	,Prepilin peptidase.,
CBU_0154	221204	NP_819204.1	29653512	7195	140515	139460	-	139460	139509	Spotted	TAATTATCGCTATGTATTTACCCGTATTCCGAATTGGTTCCGCTCTTTAG	120	27	operon	10	10	0	4	2	0	0	4	0	97	56	18	7	4	358.464	291	203.853	CBU_0154	type IV-A pilus assembly protein PilC (NCBI)	1459	NU	Type II secretory pathway, component PulF	GO:0006508,GO:0015628,GO:0015627,GO:0016020,GO:0008237,GO:0008270,GO:0008565
CBU_0155	221205	NP_819205.1	29653513	7195	142061	140508	-	140508	140557	Spotted	ACCTCAACGAAATTTACCGCGTGATTCAATCTGAAAATAACTATGCTTAA	120	27	operon	10	10	0	4	2	0	0	3	1	129	73	26	7	3	353.395	282	198.289	pilB	type IV-A pilus assembly protein PilB (NCBI)	2804	NU	Type II secretory pathway, ATPase PulE/Tfp pilus assembly pathway, ATPase PilB	GO:0006810,GO:0005622,GO:0005524
CBU_0156	221206	NP_819206.1	29653514	7195	142473	142051	-	142118	142167	Spotted	CAAGTAAAATATGGGATTGAAGCGAAAGACAATTACATCTTAACGCCGAC	120	27	operon	9	9	0	0	1	0	0	4	0	32	13	7	3	2	332.594	209	235.614	pilA	type IV-A pilin protein, PilA (NCBI)	4969	NU	Tfp pilus assembly protein, major pilin PilA
CBU_0156a	5437806	YP_002332950.1	215918904	7195	142882	142721	-					121		-	0	0	0	0	0	0	0	0	0									CBU_0156a	phage integrase family protein (RefSeq)				GO:0015074,GO:0006310,GO:0003677
CBU_0157	221207	NP_819207.1	29653515	7195	143126	143025	-	143055	143104	Spotted	ATACCAAAATACTGAATGAATTTTGCGGAGAAAAGGAGGGCTCTATTTTC	122	28	operon	2	2	0	0	0	0	0	0	0	2	2	2	2	0	854.5	854.5	20.5061	CBU_0157	hypothetical protein (NCBI)
CBU_0158	221208	NP_819208.1	29653516	7195	143680	143123	-	143221	143270	Spotted	TAATCCGTATCTGGATTTAGTTAGTGGTACTAATTGCCAACGACACCGAC	122	28	operon	5	3	0	4	0	0	0	0	0	19	6	3	2	1	328.105	193	260.319	CBU_0158	CRISPR-associated YPO2462 family protein (NCBI)
CBU_0159	221209	NP_819209.2	215918905	7195	144798	143689	-	143730	143779	Spotted	TGCAAGGGTAGAAGATGAACACTATGTTATGGCCGTATTAGTTCGTGGTG	122	28	operon	3	3	0	2	0	0	0	0	0	14	5	3	3	1	343.357	215	292.215	CBU_0159	CRISPR-associated Cas5e family protein (RefSeq)
CBU_0159a	5437807			7195	145441	144782	-					123		-	0	0	0	0	0	0	0	0	0									CBU_0159a
CBU_0161	2209964			7195	146903	145652	-					124		-	0	0	0	0	0	0	0	0	0									CBU_0161
CBU_0162	221210			7195	147264	148860	+	146996	147045	Spotted	AAAGAAATAGAAGCATTGTCAGAGAAGCAAGAAGTGAGTATGCGGAACGC	125		-	0	0	0	0	0	0	0	0	0									CBU_0162	hypothetical protein (RefSeq)
CBU_0162b	5437808			7195	151673	151530	-					126		-	0	0	0	0	0	0	0	0	0									CBU_0162b
CBU_0164	2209966			7195	151224	150257	-					127		-	0	0	0	0	0	0	0	0	0									cas1
CBU_0165	221211	NP_819211.1	29653519	7195	152283	151693	-	151902	151953	Spotted	CGTCTTACCTATTCTAGGCTAGACTATGTCATCACACATTATTCTTTTCGCT	128		-	5	5	0	0	0	0	0	0	0	5	5	2	1	0	546.4	418	187.468	CBU_0165	hypothetical protein (NCBI)
CBU_0166	221212	NP_819212.1	29653520	7195	153058	152294	-	152391	152442	Spotted	GGGCAATGCTAATAAGCTTGTATTGTAATCAAGATAAGGTAGTCATTGCTTA	129		-	9	5	4	4	0	0	0	0	0	27	14	5	4	1	357.963	267	238.981	CBU_0166	condensation domain protein (NCBI)
CBU_0167	221213	NP_819213.1	29653521	7195	153046	153609	+	153488	153539	Spotted	TCGATGCCAAAGAAGCCTATCGTTTACAATTAATTGACTTATTAAGTGATGA	130		-	5	5	0	0	0	0	0	1	0	16	7	5	0	0	334.5	237.5	210.205	pksH	polyketide biosynthesis enoyl-CoA hydratase (NCBI)				GO:0008152,GO:0003824
CBU_0168	221214	NP_819214.1	29653522	7195	153755	154033	+	153973	154023	Spotted	GGGTGAATTAGCAGATTTATTAGACACCCAATTGCATATAATGGAGAGAAA	131	29	operon	5	5	0	0	0	0	0	1	0	6	6	3	2	0	605.333	579	245.003	CBU_0168	acyl carrier protein (NCBI)				GO:0048037
CBU_0169	221215			7195	154033	155276	+	154396	154446	Spotted	TGCGTTCTGATATTTTCAATCGATCATATCATTGTCGATGGTATGTCTTTT	131	29	operon	5	5	1	0	0	0	0	0	0	5	5	3	2	1	646.4	539	257.09	CBU_0169	hypothetical protein (RefSeq)
CBU_0170					154829	154880		154829	154880	Spotted	AGGAGATTATCATTCAGAGATAAACACGCTATTGGTGGTATCAAAATCCATT	132		-	5	5	1	0	0	0	0	0	0	5	5	3	2	1	646.4	539	257.09
CBU_0171					155307	155358		155307	155358	Spotted	GTCAGGAAATCAATTACCCTAGGCTTTTCATAAATACGGGTAGTCTATACTT	132		-	1	1	0	0	0	0	0	0	0	1	1	1	0	0	663	663	#DIV/0!
CBU_0172					155576	155625		155576	155625	Spotted	TATGGAAAATTTCGTCGAGCAAGGATTAACAAAGTCCATCGGTGTTTCCA	132		-	1	1	0	0	0	0	0	0	0	1	1	1	0	0	663	663	#DIV/0!
CBU_0173	221219	NP_819219.1	29653527	7195	156106	155654	-	155689	155738	Spotted	GAATGCGGATGAAGATATATTTCAGCTATCCTCCTATCTGACAACGACGC	133		-	1	1	0	0	0	0	0	0	0	3	3	0	0	0	351	340	73.1232	CBU_0173	hypothetical protein (NCBI)
CBU_0174	221220	NP_819220.1	29653528	7195	156677	156432	-	156531	156580	Spotted	TTGAAAATACGACCAATAAAACATTGACTTACCGAAACATTTACGAGCCT	134		-	3	3	0	0	0	0	0	0	0	3	3	1	0	0	521.667	497	107.151	CBU_0174	hypothetical protein (NCBI)
CBU_0175	221221	NP_819221.1	29653529	7195	156814	157554	+	157466	157515	Spotted	TTTTAGGCCGAAAACATAACCTCATTCGTGAACAGTTTAATACTGCGGGC	135		-	5	4	0	1	0	0	0	0	0	31	11	3	0	0	264.71	194	150.052	CBU_0175	serine/threonine protein kinase domain protein (NCBI)				GO:0006468,GO:0004682,GO:0005524	2.7.11.1	Non-specific serine/threonine protein kinase.
CBU_0176	221222	NP_819222.1	29653530	7195	157619	158806	+	158720	158769	Spotted	GATCCGAATATTGGGAAAGCGATTATGGTTTATCATCTCGATGGTGTGGC	136		-	6	2	2	2	0	0	0	0	1	30	9	3	1	1	277.967	188.5	197.104	CBU_0176	serine protease domain protein (NCBI)	265	O	Trypsin-like serine proteases, typically periplasmic, contain C-terminal PDZ domain	GO:0006508,GO:0004252
CBU_0177	221223	NP_819223.2	215918906	7195	160395	158815	-	159022	159071	Spotted	ATTTAGTTCCCTTGGAAGATGACAAACACCTATATCCACCCTACTACGCG	137	30	operon	10	10	0	1	0	0	0	0	1	84	39	7	1	1	274.381	237.5	137.648	CBU_0177	quaternary amine ABC transporter permease/periplasmic amine-binding protein (RefSeq)	1732	M	Periplasmic glycine betaine/choline-binding (lipo)protein of an ABC-type transport system (osmoprotectant binding protein)	GO:0006810,GO:0016020,GO:0005215,GO:0005488
CBU_0178	221224	NP_819224.1	29653532	7195	161150	160392	-	160584	160635	Spotted	ACGTTCTGCTTTACAAGAGGAAATGATTCATCTTAACCAAAAGTTAGGTAAA	137	30	operon	10	10	2	2	0	0	0	0	0	89	23	7	1	1	251.258	201	145.441	CBU_0178	ABC transporter, ATP-binding protein (NCBI)	1125	E	ABC-type proline/glycine betaine transport systems, ATPase components	GO:0005524,GO:0016887
CBU_0179	221225	NP_819225.1	29653533	7195	162315	161197	-	161372	161421	Spotted	CGCAATCATCATTTGGTTAATCGTTTAAAAGTATTGTGCAAACCACTGCG	138	31	operon	10	10	0	1	0	0	0	0	0	71	48	20	3	2	380.31	327	194.962	CBU_0179	hypothetical protein (NCBI)	2377	O	Predicted molecular chaperone distantly related to HSP70-fold metalloproteases		2.7.1.-
CBU_0180	221226	NP_819226.2	215918907	7195	163677	162319	-	162319	162368	Spotted	AAGACACTGAATTAGCGGCGAATAACATGAAAATGAAACATCCGAGTTAA	138	31	operon	10	9	0	3	0	0	0	0	0	86	45	13	2	1	320.593	257.5	173.25	CBU_0180	peptidase family M23/M37 domain-containing protein (RefSeq)	739	M	Membrane proteins related to metalloendopeptidases	GO:0006508,GO:0016998,GO:0004222
CBU_0181	221227	NP_819227.1	29653535	7195	163701	164900	+	164801	164850	Spotted	TGGTGAACGTGTTGAAGATATTAAATTAGCTATCCCTCGAGGTGAAAGCC	139		-	10	9	0	0	0	0	1	3	1	230	138	39	5	1	338.622	288	166.438	tyrS	tyrosyl-tRNA synthetase (NCBI)	162	J	Tyrosyl-tRNA synthetase	GO:0006437,GO:0005737,GO:0003723,GO:0004831,GO:0005524	6.1.1.1	Tyrosine--tRNA ligase.
CBU_0181a	5437809	YP_002332951.1	215918908	7195	165194	164937	-					140		-	0	0	0	0	0	0	0	0	0									CBU_0181a	hypothetical protein (RefSeq)
CBU_0182	221228	NP_819228.1	29653536	7195	170459	170932	+	170883	170932	Spotted	GGCATGAAATAAATGATCTCCTAAGGTTGCTTGGTGAGAAAATGGTATAG	141		-	0	0	0	0	0	0	0	0	0									CBU_0182	homing endonuclease, 23S rRNA intron (NCBI)				GO:0006314,GO:0003677,GO:0004519
CBU_0183	221229	NP_819229.2	215918909	7195	172242	172514	+	172441	172490	Spotted	AACTTGAAGAATGTTGTGGCCAATTAATAGAAGCGATCCCAGAACTGGAG	142		-	0	0	0	0	0	0	0	0	0									CBU_0183	hypothetical protein (RefSeq)
CBU_0184	221230	NP_819230.1	29653538	7195	173757	172597	-	172624	172675	Spotted	GCTTCCCTGGATTCTCTTAGGTCGGATATTAAAGTTTATGACCTTGGAGAGG	143		-	6	6	0	0	0	0	0	0	4	10	8	5	0	0	499.8	582.5	247.992	CBU_0184	hypothetical protein (NCBI)
CBU_0185	221231			7195	174848	173797	-	173955	174006	Spotted	ATAGAATACATCAAGGCAAAGAATTATCTTTTGAACTTAGGCCCAGGTGTAG	144		-	6	6	2	0	0	0	0	0	2	9	8	6	4	0	619.889	725	278.917	CBU_0185	hypothetical protein (RefSeq)
CBU_0186					174193	174244		174193	174244	Spotted	ACCAATTAATTTATCTGGATAAGCATGCAAGATTTAATCCGGATTATACCGT	145		-	6	6	1	0	0	0	0	0	3	9	8	6	4	0	619.333	725	278.352
CBU_0187	221233			7195	176126	174976	-	175009	175060	Spotted	CCGAAGAATTCCGTGGATTCTACTTCACCAAACCTTAAAATTAATGAGTATT	146	33	operon	6	6	1	0	0	0	0	0	3	9	8	6	4	0	618.667	725	277.667	CBU_0187	hypothetical protein (RefSeq)
CBU_0188					175645	175696		175645	175696	Spotted	AGCTGTTGACCATACAATATCCAAAGCATGCTATTTATATTCCAAGGATATT	147	33	operon	6	6	2	0	0	0	0	0	2	9	8	6	4	0	619.222	725	278.235
CBU_0189	221235			7195	177337	176127	-	176261	176310	Spotted	CAATCTAATTTATGCGAGCACTCATGTTATGGTATCACCGATATCCGCCG	148	33	operon	7	7	0	1	0	0	0	0	0	25	9	6	4	0	344.12	210	268.465	CBU_0189	CAAX amino terminal protease family protein (RefSeq)
CBU_0190					177214	177265		177214	177265	Spotted	GCCCTATTCTCTAAAATCCGTCGAATTTCATTATTTCAAGAGCTCACTAAAG	149		-	8	8	0	0	0	0	0	0	0	9	9	6	0	0	473	513	78.3741
CBU_0191	221237			7195	177540	178523	+	178222	178271	Spotted	ACAGCGTCTTCAGATTGTGTATTAGCCGTTTTAGAAGTAACGACGATTAA	150		-	4	4	1	1	0	0	0	0	0	32	10	2	1	1	261.156	208.5	155.452	CBU_0191	prolipoprotein diacylglyceryl transferase, putative (RefSeq)				GO:0009249,GO:0016020,GO:0016740	2.4.99.-
CBU_0192					178386	178435		178386	178435	Spotted	CACAGTACTAATATTGGGTGGCGCACTTTTAATGATCTGGTGATTCAGGA	151		-	3	3	1	0	0	0	0	0	0	9	9	2	1	1	395.222	284	218.286
CBU_0193	221239	NP_819239.2	215918910	7195	178601	179812	+	179489	179538	Spotted	ATTGATGCTTTTATATCGTATGCCCGAATGAACGGAGGAATGATCTGTGG	152		-	2	2	0	0	0	0	0	0	0	10	4	1	0	0	284.1	222	109.761	CBU_0193	hypothetical membrane associated protein (RefSeq)
CBU_0194	221240	NP_819240.1	29653548	7195	181207	179840	-	179879	179928	Spotted	TGCGTGAAATCGGCCGTAACATGAATACTATTTACAAAGAAACCTCGAAA	153		-	10	8	0	0	0	0	5	1	0	88	54	19	6	2	368.602	325	199.007	sda	L-serine dehydratase, iron-sulfur-dependent, single chain form (NCBI)	1760	E	L-serine deaminase	GO:0006094,GO:0003941	4.3.1.17,4.2.1.13	L-serine ammonia-lyase.,Transferred entry: 4.3.1.17.
CBU_0195	221241	NP_819241.1	29653549	7195	181388	182689	+	182431	182480	Spotted	TAAGCGGGAATACTCTGCAACGCAATATGCAATTTTATCGGCATTAATGG	154		-	10	10	0	0	0	0	0	1	0	107	53	8	2	0	289.439	247	139.121	ampG	AmpG protein (NCBI)				GO:0006810,GO:0016021,GO:0005215
CBU_0196	221242	NP_819242.1	29653550	7195	182776	182988	+	182886	182935	Spotted	CCTTCGTGATTTTCATGCTAAGGCGTTACAGGATTTCGATGCTAAAGCAG	155		-	2	2	0	0	0	0	0	0	0	2	2	1	0	0	535	535	117.38	CBU_0196	hypothetical protein (NCBI)
CBU_0197	221243	NP_819243.1	29653551	7195	185847	183058	-	183094	183143	Spotted	TAATTAGCGAAAATTGGGCTATTCAAACCGAAACTAGCTCGCTTGGTAGC	156	34	operon	4	3	0	2	0	0	0	0	0	45	12	3	1	1	250.289	191	152.748	CBU_0197	hypothetical protein (NCBI)
CBU_0198	221244	NP_819244.1	29653552	7195	187580	185844	-	186403	186452	Spotted	TTAACGGCACTAAGAGAACGTTATAATTTGCGCGATTTACCGAGGACGAA	156	34	operon	10	9	0	3	0	0	0	0	0	77	31	6	1	1	277.688	230	143.586	CBU_0198	hypothetical protein (NCBI)	729	M	Outer membrane protein	GO:0019867
CBU_0199	221245	NP_819245.1	29653553	7195	187721	188677	+	188496	188545	Spotted	ATTTCCATTATTTGACACAAATGTCTGAAACTGAGGTTGCCGCATTTGCG	157	35	operon	10	7	0	0	0	0	3	3	0	43	30	11	3	3	404.279	404	208.942	coaA	pantothenate kinase (NCBI)	1072	H	Panthothenate kinase	GO:0015937,GO:0005737,GO:0004594,GO:0005524	2.7.1.33	Pantothenate kinase.
CBU_0200	221246	NP_819246.2	215918911	7195	188678	189565	+	189341	189390	Spotted	GAACAACTGACGACGGTAGATGAAAATAAGGAAATAACGCTGCATTACCC	157	35	operon	4	4	0	0	0	0	0	0	0	42	15	2	0	0	243.5	211.5	104.286	CBU_0200	aldose 1-epimerase family protein (RefSeq)	2017	G	Galactose mutarotase and related enzymes	GO:0005975,GO:0016853,GO:0030246
CBU_0201	221247	NP_819247.1	29653555	7195	190041	189646	-	189691	189740	Spotted	CCTTGATGATTGCGAAACGTCACGAACACCAAGAAGTCCTTGAAGTATTG	158		-	10	1	0	9	0	0	0	0	0	20	13	7	0	0	418.45	397.5	225.919	CBU_0201	ankyrin repeat family protein (NCBI)
CBU_0202	221248			7195	190097	190632	+	190151	190200	Spotted	ATTGAAAAGTTTCAGTCCGCAACAGGTATTGGCCCTGATGAGATTGATAG	159		-	2	2	0	0	0	0	0	0	0	2	2	1	0	0	571.5	571.5	132.229	CBU_0202	hypothetical protein (RefSeq)
CBU_0203					190559	190608		190559	190608	Spotted	AAGTAGGGACAGATCCAGTTATCTTCGTTGAGAAAATAGCCCCAGAAGAG	160		-	1	1	0	0	0	0	0	0	0	2	2	0	0	0	431.5	431.5	65.7609
CBU_0204					190916	190965		190916	190965	Spotted	GTATGTGTTTCATGGGCGATAGCATACCGGAACTCTTAAGCAGAAAACAG	160		-	2	2	0	0	0	0	0	0	0	3	3	2	0	0	503	528	185.766
CBU_0205	221251	NP_819251.2	215918912	7195	190941	192362	+	192313	192362	Spotted	TTAAACGCTTGGATCATGCCATTCGGTTTATTCATCAAGGTATGGGCTAG	161		-	10	2	0	1	0	0	9	2	1	196	115	18	11	1	315.765	270	174.077	gltX-1	glutamyl-tRNA synthetase (RefSeq)	8	J	Glutamyl- and glutaminyl-tRNA synthetases	GO:0006424,GO:0017101,GO:0009332,GO:0004818,GO:0005524	6.1.1.17	Glutamate--tRNA ligase.
CBU_0206	221252	NP_819252.1	29653560	7195	192424	192816	+	192685	192734	Spotted	TTCACTATTGACGCCACAAAATCCATTGTAAAATGGTGGCTTAAACGCTC	162		-	6	6	0	0	0	0	0	0	0	9	8	5	0	0	482.444	528	166.748	CBU_0206	hypothetical protein (NCBI)
CBU_0207	221253	NP_819253.2	215918913	7195	193066	193371	+	193275	193326	Spotted	CTGGCAATACTCAAGTATTCATTATTACATCACTAAAGGCATTTTACCTGCT	163		-	1	1	0	0	0	0	0	0	0	15	3	0	0	0	222.933	186	84.6391	CBU_0207	hypothetical protein (RefSeq)
CBU_0208	2209974			7195	193705	194576	+					164		-	0	0	0	0	0	0	0	0	0									CBU_0208
CBU_0209	221254	NP_819254.1	29653562	7195	194626	195606	+	195551	195600	Spotted	ACCAAACTTTCAGTGAAATTAAAGCGTCGAGCACATGGGATTACACTTCG	165		-	3	3	0	0	0	0	0	0	0	3	3	1	1	0	585.667	444	245.374	CBU_0209	hypothetical protein (NCBI)				GO:0006426,GO:0005737,GO:0004820,GO:0005524
CBU_0210	221255	NP_819255.1	29653563	7195	195585	195722	+	195646	195697	Spotted	GCGCCGACAGCCAAATTTATTTTGACGATAAAGTTATTTTCAATGAGAAATT	166		-	3	3	0	0	0	0	0	0	0	3	3	1	1	0	585.667	444	245.374	CBU_0210	hypothetical protein (NCBI)
CBU_0211	221256			7195	196006	197263	+	196919	196970	Spotted	AGGAACGATTATTAGCGGCAATAGCTAATCTTAATGATGAGAGAAACGAGAG	167		-	3	3	1	0	0	0	0	0	0	3	3	1	1	1	620	444	304.841	CBU_0211	hypothetical protein (RefSeq)
CBU_0212					197143	197193		197143	197193	Spotted	TGTGCACGAAGACAGACTTGTCATTCGTAATTTTGATGAGGGTCCTGATAA	168		-	3	3	1	0	0	0	0	0	0	3	3	1	1	1	620	444	304.841
CBU_0213	221258	NP_819258.1	29653566	7195	197560	197402	-	197502	197551	Spotted	TTCATTTCTCTCTTCTGTTGCTGCTGTTATTCCTTGGACCCTGTTAGACA	169		-	0	0	0	0	0	0	0	0	0	1	1	0	0	0	303	303	#DIV/0!	CBU_0213	hypothetical protein (NCBI)
CBU_0214	221259	NP_819259.1	29653567	7195	197944	198663	+	198593	198643	Spotted	GCGCTTTAATGTTGTATTTGGATTTCATCAACTTATTTCTTAGCTTGCTGC	170		-	10	10	0	0	0	0	0	0	0	93	51	7	0	0	297.269	260	114.47	CBU_0214	hypothetical protein (NCBI)	670	R	Integral membrane protein, interacts with FtsH
CBU_0215	221260	NP_819260.2	215918914	7195	200316	198718	-	198773	198822	Spotted	CTCGCCAACAGAAAATACTTTCAAATTTCTTACTTGGATGAATTACCCAA	171		-	8	5	0	3	0	0	0	0	0	46	20	2	0	0	276.674	240	107.851	CBU_0215	NlpC-P60 family protein (RefSeq)				GO:0008152,GO:0003824
CBU_0216	221261			7195	200501	201780	+	201163	201212	Spotted	GGTTAGCGACGCTTTAATGTACGCAGCTTTTAATATTCGCAATGTTTATG	172		-	2	2	1	0	0	0	0	0	0	3	3	2	1	1	589.333	555	304.953	CBU_0216	hypothetical protein (RefSeq)
CBU_0217					201639	201688		201639	201688	Spotted	AAAAGCATGGAACGTTGCGACGCTTAATAAAATTTCGAGAAAACTTATTG	173		-	2	2	1	0	0	0	0	0	0	3	3	1	1	1	569.333	408	295.163
CBU_0217a	5437810	YP_002332952.1	215918915	7195	201949	202089	+					174		-	0	0	0	0	0	0	0	0	0									CBU_0217a	hypothetical protein (RefSeq)
CBU_0218	221263	NP_819263.1	29653571	7195	202174	203724	+	203567	203618	Spotted	GCGTTTCAACAATATCTGTATCGACCGTAATGACGAGTTTATTAGGCTATAT	175	36	operon	10	1	1	1	1	1	10	4	0	58	25	17	17	4	411.155	215.5	322.586	cydA-1	cytochrome d ubiquinol oxidase, subunit I (NCBI)	1271	C	Cytochrome bd-type quinol oxidase, subunit 1	GO:0006118,GO:0016020,GO:0016491	1.10.3.-
CBU_0218a	5437811			7195	203733	204896	+					175	36	operon	0	0	0	0	0	0	0	0	0									CBU_0218a
CBU_0220	221264	NP_819264.1	29653572	7195	204884	205003	+	204929	204978	Spotted	TTTGGATTTTATTTAACGTTGCGAATGAACAAATGTATCGAACGACCCAG	176		-	1	1	0	0	0	0	0	0	0	1	1	1	1	0	869	869	#DIV/0!	CBU_0220	hypothetical protein (NCBI)
CBU_0221	221265	NP_819265.1	29653573	7195	204996	205727	+	205511	205560	Spotted	TATAAAAGCGATTGGCCAGGGATTATCTTTCCCCTTGCAGAAATTCACAA	177		-	10	10	0	3	0	0	0	1	0	48	19	5	2	0	294.208	196	178.153	CBU_0221	phosphopantethiene--protein transferase domain protein (NCBI)	2091	H	Phosphopantetheinyl transferase	GO:0006633,GO:0009059,GO:0000287,GO:0008897
CBU_0221a	5437812	YP_002332953.1	215918916	7195	205996	206112	+					178		-	0	0	0	0	0	0	0	0	0									CBU_0221a	hypothetical protein (RefSeq)
CBU_0221b	5437813	YP_002332954.1	215918917	7195	206314	207507	+					179		-	0	0	0	0	0	0	0	0	0									CBU_0221b	protein translation elongation factor Tu (EF-TU) (RefSeq)	50	J	GTPases - translation elongation factors	GO:0006414,GO:0005622,GO:0008547,GO:0003924,GO:0003746,GO:0005525	3.6.5.3	Protein-synthesizing GTPase.
CBU_0222					206412	206454		206412	206454	Spotted	GAAGGTGTTGTCGGAGAAATACGGCGGAGAAAAGAAAGCCTTT	180		-	1	1	0	0	0	0	0	0	0	27	3	1	0	0	183.481	152	80.5411
CBU_0223					206728	206777		206728	206777	Spotted	GACATGGTGGATGACAAAGAGCTGTTGGAATTAGTGGAAATGGAAGTGAG	180		-	10	9	0	2	0	8	0	7	0	108	64	42	30	4	449.639	332	278.616
CBU_0224	221268	NP_819268.1	29653576	7195	207752	208135	+	208059	208108	Spotted	TTACGGCCCTCATTTTATGGGGTCTTGATAGCTTCTTTATGTGGGCTATC	181	38	operon	10	5	0	0	4	3	0	8	0	105	52	12	8	3	317.057	245	194.165	secE	preprotein translocase, SecE subunit (NCBI)	690	U	Preprotein translocase subunit SecE	GO:0006605,GO:0009306,GO:0016021,GO:0015450
CBU_0225	221269	NP_819269.2	215918918	7195	208160	208726	+	208411	208460	Spotted	AGTGCAAATGGTGATGAATGATAAGACCTCTGACCTCGTACGAAGCATAC	181	38	operon	10	9	0	2	3	4	0	9	0	192	112	55	21	7	388.531	292.5	240.958	nusG	transcription termination/antitermination factor NusG (RefSeq)	250	K	Transcription antiterminator	GO:0006355,GO:0003711
CBU_0226	221270	NP_819270.1	29653578	7195	208851	209288	+	208936	208985	Spotted	GTCAGCATGGTGTTAACATCCGGGAATTTTGTGAATCATTTAATACGGCA	181	38	operon	10	10	0	1	9	9	0	5	0	236	139	76	50	25	432.466	300	284.824	rplK	ribosomal protein L11 (NCBI)	80	J	Ribosomal protein L11	GO:0006412,GO:0005840,GO:0003735
CBU_0227	221271	NP_819271.1	29653579	7195	209288	209986	+	209898	209947	Spotted	CAGCTAAAGGAACGTATTTAAAGAAATTAACGTTATCGAGCACAATGGGC	181	38	operon	10	10	0	3	10	10	0	3	0	215	133	74	53	34	454.26	321	296.98	rplA	50S ribosomal protein L1 (NCBI)	81	J	Ribosomal protein L1	GO:0006412,GO:0015934,GO:0003723,GO:0003735
CBU_0228	221272	NP_819272.1	29653580	7195	210240	210764	+	210454	210503	Spotted	TCGAAGAAGTACTAACGGGTCCTATTGTATTGTTCTTTTCGCAAGAAGAA	181	38	operon	10	10	0	1	9	9	0	7	0	202	120	62	49	31	437.569	304	298.316	rplJ	ribosomal protein L10 (NCBI)	244	J	Ribosomal protein L10	GO:0006412,GO:0042254,GO:0005840,GO:0003735
CBU_0229	221273	NP_819273.1	29653581	7195	210798	211178	+	211047	211096	Spotted	CTTGGATTGAAAGAAGCTAAAGATTTGGTGGAATCAGTTCCGAGTGTGGT	181	38	operon	10	9	0	0	3	9	0	7	0	180	121	61	41	26	461.606	372.5	282.915	rplL	ribosomal protein L7/L12 (NCBI)	222	J	Ribosomal protein L7/L12	GO:0006412,GO:0005840,GO:0003735
CBU_0230	221274	NP_819274.1	29653582	7195	211191	211310	+	211223	211257	Spotted	CAAGCGGGGCCGCCATTGGAAAGAATGTCTAATGG	182		-	4	4	0	0	0	0	0	0	0	49	8	3	2	0	227.673	176	153.818	CBU_0230	hypothetical protein (NCBI)
CBU_0231	221275	NP_819275.2	215918919	7195	211325	215458	+	215409	215458	Spotted	TAAAAGAAATCCGTTCGTTGGCGATTGATATTGGTTTGGAGAATGATTGA	183	39	operon	10	8	1	1	6	7	5	10	0	248	161	80	45	17	423.371	335.5	257.008	rpoB	DNA-directed RNA polymerase beta chain (RefSeq)	85	K	DNA-directed RNA polymerase, beta subunit/140 kD subunit	GO:0006350,GO:0003677,GO:0003902,GO:0003899,GO:0003900,GO:0003901	2.7.7.6	DNA-directed RNA polymerase.
CBU_0232	221276	NP_819276.1	29653584	7195	215727	219971	+	219750	219799	Spotted	GATTTACGTGGATTAAAAGAGAACGTTATCGTGGGACGTCTAATTCCGGC	183	39	operon	10	8	1	1	1	4	6	7	0	194	126	67	44	14	437	336	265.711	rpoC	DNA-directed RNA polymerase beta' subunit (NCBI)	86	K	DNA-directed RNA polymerase, beta' subunit/160 kD subunit	GO:0006350,GO:0005634,GO:0003677,GO:0003902,GO:0003899,GO:0003900,GO:0003901	2.7.7.6	DNA-directed RNA polymerase.
CBU_0233	221277	NP_819277.2	215918920	7195	220265	220687	+	220645	220687	Spotted	CCGCGGTCGTTCGAAATATGGTGAAAAGAAACCGAAAGAGTAA	184	40	operon	10	10	0	1	8	10	0	6	0	239	170	73	51	37	451.904	352	274.783	rpsL	SSU ribosomal protein S12P (RefSeq)	48	J	Ribosomal protein S12	GO:0006412,GO:0015935,GO:0003735
CBU_0234	221278	NP_819278.1	29653586	7195	220700	221275	+	220970	221012	Spotted	GCATTGGCTCTCGAAACCTTTAAAGGGGCATTAGATAAAGTCA	184	40	operon	10	10	0	1	9	9	0	3	0	245	159	64	48	31	417.139	304	269.772	rpsG	30S ribosomal protein S7 (NCBI)	49	J	Ribosomal protein S7	GO:0006412,GO:0015935,GO:0003735
CBU_0235	221279	NP_819279.1	29653587	7195	221285	223384	+	223092	223141	Spotted	AAGCAGATCCTGTATTACTAGAGCCAATTATGAAAGTGGAAGTGGTCACG	184	40	operon	10	10	0	3	9	8	0	5	1	271	179	76	48	31	425.649	340	261.597	fusA	translation elongation factor G (NCBI)	480	J	Translation elongation factors (GTPases)	GO:0006414,GO:0005622,GO:0003746,GO:0003924,GO:0008547,GO:0005525	3.6.5.3	Protein-synthesizing GTPase.
CBU_0236	221280	NP_819280.1	29653588	7195	223400	224593	+					184	40	operon	10	10	0	2	0	7	5	6	1	138	79	45	35	10	434.232	285	284.579	tuf-2	translation elongation factor Tu (NCBI)	50	J	GTPases - translation elongation factors	GO:0006414,GO:0005622,GO:0003746,GO:0003924,GO:0008547,GO:0005525	3.6.5.3	Protein-synthesizing GTPase.
CBU_0237	221281	NP_819281.2	215918921	7195	224774	225115	+	224972	225021	Spotted	GATCAGTACGAAATTCGCACGCACAAACGGTTAGTAGATATTTCGGAACC	184	40	operon	10	10	0	3	10	8	2	6	0	203	121	65	53	36	449.084	309	305.45	rpsJ	30S ribosomal protein S10 (RefSeq)	51	J	Ribosomal protein S10	GO:0006412,GO:0015935,GO:0003735
CBU_0238	221282	NP_819282.1	29653590	7195	225137	225790	+	225414	225464	Spotted	CAAAAGCTGGCGATGAATTAAAGGTAGATATCTTTAAAGAAGGCCAAGTGG	184	40	operon	10	10	0	0	10	8	0	7	0	214	131	73	53	33	449.836	308.5	296.426	rplC	ribosomal protein L3 (NCBI)	87	J	Ribosomal protein L3	GO:0006412,GO:0005840,GO:0003735
CBU_0239	221283	NP_819283.2	215918922	7195	225787	226407	+	226358	226407	Spotted	TAGTGGTTACTGTTGATGCCGTAAAGAGACTGGAAGAGAGATTATCATGA	184	40	operon	10	10	0	1	10	9	0	8	0	222	124	74	54	35	438.14	284.5	299.389	rplD	LSU ribosomal protein L1E (= L4P) (RefSeq)	88	J	Ribosomal protein L4	GO:0006412,GO:0005840,GO:0003735
CBU_0240	221284	NP_819284.1	29653592	7195	226404	226691	+	226556	226605	Spotted	AAAATCCGTGCGTACTTGCAATGTTAAAGGTAAAACAACACGATTTCGGC	184	40	operon	10	9	0	2	9	8	0	8	0	165	104	65	52	33	487.23	317	320.757	rplW	ribosomal protein L23 (NCBI)	89	J	Ribosomal protein L23	GO:0006412,GO:0005840,GO:0000166,GO:0003723,GO:0003735
CBU_0241	221285	NP_819285.1	29653593	7195	226711	227538	+	227475	227524	Spotted	TTATAAAACGCGTCGCAATAAACGCACGAGCAACATGATCATTCGTGATC	184	40	operon	10	9	0	4	10	10	2	7	0	230	130	71	52	35	431.67	273.5	295.638	rplB	50S ribosomal protein L2 (NCBI)	90	J	Ribosomal protein L2	GO:0006412,GO:0015934,GO:0003723,GO:0016740,GO:0003735
CBU_0242	221286	NP_819286.1	29653594	7195	227551	227838	+	227734	227783	Spotted	ATTTCAGAGAATATGGTGGGTCACAAATTGGGTGAATTTGCGATAACCCG	184	40	operon	10	10	0	1	9	7	4	7	0	201	121	67	47	32	452.274	312	298.031	rpsS	ribosomal protein S19 (NCBI)	185	J	Ribosomal protein S19	GO:0006412,GO:0015935,GO:0003735
CBU_0243	221287	NP_819287.1	29653595	7195	227838	228185	+	228011	228060	Spotted	AGAGCATAACGAGGGCGCTGACATTGATGAATTAAAAGTATCGACCGTAA	184	40	operon	10	9	0	0	10	10	0	8	0	194	109	66	55	36	457.026	284	318.996	rplV	ribosomal protein L22 (NCBI)	91	J	Ribosomal protein L22	GO:0006412,GO:0015934,GO:0003735
CBU_0244	221288	NP_819288.1	29653596	7195	228185	228868	+	228526	228575	Spotted	ATTAGTCGCTGAAAACATAGCTCAACAATTAGAACGTCGGGTCATGTTCC	184	40	operon	10	10	0	0	9	10	0	8	0	212	110	61	49	33	423.476	263	299.965	rpsC	ribosomal protein S3 (NCBI)	92	J	Ribosomal protein S3	GO:0006412,GO:0015935,GO:0003723,GO:0003735
CBU_0245	221289	NP_819289.1	29653597	7195	228880	229293	+	228899	228948	Spotted	GAAAATATCGCAAAGATTTTAAAGGCAGAAATCGAGGGGTTGCTAGCCGT	184	40	operon	10	10	0	2	10	9	0	8	0	187	108	62	54	33	460.963	299	316.642	rplP	50S ribosomal protein L16 (NCBI)	197	J	Ribosomal protein L16/L10E	GO:0006412,GO:0005840,GO:0003735
CBU_0246	221290	NP_819290.1	29653598	7195	229294	229491	+	229342	229384	Spotted	GAGCTGCTTGAATTGTTAAAAGAGCAGTTTAACCTGCGCATGC	184	40	operon	10	10	0	0	0	0	0	0	0	61	35	26	15	11	462.656	374	295.801	rpmC	ribosomal protein L29 (NCBI)	255	J	Ribosomal protein L29	GO:0006412,GO:0005840,GO:0003735
CBU_0247	221291	NP_819291.2	215918923	7195	229502	229753	+	229636	229685	Spotted	TAAAGGCAATGAGGGTCAAATAGGTGATATCGTTACGATCCGGGAATGTC	184	40	operon	10	10	0	1	3	8	5	8	0	174	98	63	52	31	468.109	289.5	317.814	rpsQ	SSU ribosomal protein S17P (RefSeq)	186	J	Ribosomal protein S17	GO:0006412,GO:0005840,GO:0003735
CBU_0248	221292	NP_819292.1	29653600	7195	229764	230132	+	230069	230120	Spotted	GGTCCGTGAGTTACGTACCGATAAATTTATGAAAATTATTTCATTGGCCTTA	184	40	operon	10	10	0	0	10	9	3	1	0	229	138	70	55	35	437.24	293	294.871	rplN	ribosomal protein L14 (NCBI)	93	J	Ribosomal protein L14	GO:0006412,GO:0015934,GO:0003735
CBU_0249	221293	NP_819293.1	29653601	7195	230144	230467	+	230328	230377	Spotted	GTGAATTAAGTATTCACGTTTCCAATGTAGCCATCTATAATCCCGCGGCT	184	40	operon	10	10	0	0	7	10	0	4	0	165	96	60	52	29	469.479	302	319.197	rplX	ribosomal protein L24 (NCBI)	198	J	Ribosomal protein L24	GO:0006412,GO:0005840,GO:0003735
CBU_0250	221294	NP_819294.1	29653602	7195	230584	231132	+	230942	230991	Spotted	AATCATTTGATGGTCGAGGTAATTATAGTTTGGGAATTCGTGAGCAAATC	184	40	operon	10	10	0	2	10	8	0	3	0	227	134	72	55	33	440.498	307	296.241	rplE	ribosomal protein L5 (NCBI)	94	J	Ribosomal protein L5	GO:0006412,GO:0005840,GO:0003735
CBU_0251	221295	NP_819295.1	29653603	7195	231137	231436	+	231146	231195	Spotted	TTAAGTGTCATTGAGCGAAATAAGAAGCGTGTTCGAAAATCCCAATCGGC	184	40	operon	10	10	0	1	10	6	0	3	0	181	125	67	44	29	477.276	384	286.492	rpsN	ribosomal protein S14 (NCBI)	199	J	Ribosomal protein S14	GO:0006412,GO:0005840,GO:0003735
CBU_0252	221296	NP_819296.2	215918924	7195	231430	231831	+	231617	231668	Spotted	TGATTACTTTGAAATATCATGAAGGAGAATCTGTTATTTCAGAAATCCGGCG	184	40	operon	10	10	0	4	10	9	0	2	0	204	128	68	50	34	449.402	291	301.735	rpsH	SSU ribosomal protein S8P (RefSeq)	96	J	Ribosomal protein S8	GO:0006412,GO:0005840,GO:0003735
CBU_0253	221297	NP_819297.1	29653605	7195	231869	232405	+	232353	232404	Spotted	GCATTCGATACGATAACGAACGTGTCATTCTTAAAGAGGCTAAGAAGAAATA	184	40	operon	10	10	0	1	10	10	1	0	0	203	121	71	53	35	454.01	283	303.834	rplF	50S ribosomal protein L6 (NCBI)	97	J	Ribosomal protein L6P/L9E	GO:0006412,GO:0005840,GO:0003735
CBU_0254	221298	NP_819298.1	29653606	7195	232405	232758	+	232504	232553	Spotted	CATATTTACGCGCAGCTTATTTCTCCCCGTGACTCAAAAGTATTGGTCTG	184	40	operon	10	10	0	1	10	10	0	1	0	195	114	68	52	35	450.497	282	312.341	rplR	ribosomal protein L18 (NCBI)	256	J	Ribosomal protein L18	GO:0006412,GO:0005840,GO:0003735
CBU_0255	221299	NP_819299.1	29653607	7195	232770	233276	+	233195	233244	Spotted	TTTTAAAGGATTGAAACAAATGGAAACCCCGGAATCCGTTGCAGCTAAAC	184	40	operon	10	9	0	1	10	9	4	6	0	225	124	70	54	38	431.276	263	303.067	rpsE	ribosomal protein S5 (NCBI)	98	J	Ribosomal protein S5	GO:0006412,GO:0015935,GO:0003723,GO:0003735
CBU_0256	221300	NP_819300.1	29653608	7195	233280	233471	+	233422	233471	Spotted	GCATGATTGAGAAAGTGTCTTATCTCTTAATGATTGACGAGGAAGTGTAG	184	40	operon	10	10	0	0	0	0	0	0	0	66	49	30	21	7	514.712	467	286.75	CBU_0256	ribosomal protein L30p/L7e (NCBI)	1841	J	Ribosomal protein L30/L7E	GO:0006412,GO:0015934,GO:0003735
CBU_0257	221301	NP_819301.1	29653609	7195	233474	233905	+	233766	233815	Spotted	CTAATATCATTAGCCGTCAGATCAAACGAGTCAAAATATTTGCCGCCGGC	184	40	operon	10	10	0	3	10	8	0	4	0	193	112	64	51	33	449.627	293	307.957	rplO	ribosomal protein L15 (NCBI)	200	J	Ribosomal protein L15	GO:0006412,GO:0015934,GO:0003735
CBU_0258	221302	NP_819302.1	29653610	7195	233923	235251	+	235002	235051	Spotted	TATTGACAAAGTGATGACGCGCCTAACTTTAGTCGGTTCTGTTTACCTTG	184	40	operon	10	8	0	3	7	3	0	7	0	200	112	65	47	31	438.09	293.5	296.384	secY	preprotein translocase SecY (NCBI)	201	U	Preprotein translocase subunit SecY	GO:0009306,GO:0016020,GO:0015450
CBU_0259	221303	NP_819303.1	29653611	7195	235526	235621	+	235532	235581	Spotted	GGTTGGGCGCTTCATTGCTTGATTTATCAAACAATCAAGAGTATGCTTAA	185	41	operon	10	10	0	0	0	0	0	0	0	47	33	8	2	0	347.702	279	184.058	CBU_0259	hypothetical protein (NCBI)
CBU_0260	221304	NP_819304.1	29653612	7195	235626	235985	+	235759	235808	Spotted	AAGTTAAAGATTTGTCCGAAGCTGAACTAGATGCATTACGGACCGAAGTG	185	41	operon	10	10	0	2	10	10	4	6	0	218	136	68	52	34	446.138	312	295	CBU_0260	30S ribosomal protein S13 (NCBI)	99	J	Ribosomal protein S13	GO:0006412,GO:0005840,GO:0003723,GO:0003735
CBU_0261	221305	NP_819305.1	29653613	7195	236013	236384	+	236303	236352	Spotted	TGGTCTGGAAGTTATCCATTTAGAAGATCGTACACCGTTACCTCATAACG	185	41	operon	10	10	0	2	9	8	4	5	0	241	156	78	53	35	442.718	318	288.005	rpsK	30S ribosomal protein S11 (NCBI)	100	J	Ribosomal protein S11	GO:0006412,GO:0005840,GO:0003735
CBU_0262	221306	NP_819306.1	29653614	7195	236397	237017	+	236968	237017	Spotted	TACCTGCTGAATTTAAAGTTAACCTCGTTGTCGAGCTTTATTCGAAATAA	185	41	operon	10	10	0	2	10	10	0	6	0	268	179	83	54	30	437.362	341	269.335	rpsD	30S ribosomal protein S4 (NCBI)	522	J	Ribosomal protein S4 and related proteins	GO:0006412,GO:0015935,GO:0003735,GO:0019843
CBU_0263	221307	NP_819307.1	29653615	7195	237030	238013	+	237858	237909	Spotted	GGCGACTTAGTACAATGCACTGAAAACGATTTACTCAAGACCCCTAATTTGG	185	41	operon	10	10	0	5	8	7	2	7	0	253	169	89	61	28	460.265	350	282.662	rpoA	DNA-directed RNA polymerase alpha subunit (NCBI)	202	K	DNA-directed RNA polymerase, alpha subunit/40 kD subunit	GO:0006351,GO:0003677,GO:0003902,GO:0003899,GO:0003900,GO:0046983,GO:0003901	2.7.7.6	DNA-directed RNA polymerase.
CBU_0264	221308	NP_819308.1	29653616	7195	238025	238405	+	238102	238152	Spotted	GTCGCTCTTTCAACATGAGTTGATTAAAACAACGTTACCAAAAGCAAAAGA	185	41	operon	10	9	0	4	10	8	0	4	0	241	159	84	55	36	455.888	332	291.293	rplQ	ribosomal protein L17 (NCBI)	203	J	Ribosomal protein L17	GO:0006412,GO:0005840,GO:0003735
CBU_0265	221309	NP_819309.1	29653617	7195	238408	239634	+	239581	239632	Spotted	ACTGCTTATGGCGTTTACATAAATCAAACCATCAGTCATTCTCATTTCTTTT	185	41	operon	10	9	0	0	1	0	0	0	0	86	37	9	3	0	306.326	239	166.792	CBU_0265	glucose/galactose transporter family protein (NCBI)	738	G	Fucose permease	GO:0015758,GO:0015757,GO:0016021,GO:0009276,GO:0005354,GO:0005355
CBU_0266	221310			7195	239721	241010	+	239798	239837	Spotted	TATTTTTGTACAGCTTGATTTTGTATTGAAAACGGTTTAA	186		-	10	10	2	0	0	0	0	0	0	45	21	8	1	1	303.4	211	179.342	CBU_0266	hypothetical protein (RefSeq)
CBU_0267					239960	240010		239960	240010	Spotted	CTCATTCCATTAATAAATCAAAGGGTATTTTCAACTTTGGAGAAGGCCTTT	187		-	10	10	2	0	0	0	0	0	0	45	16	3	3	1	280.178	193	179.678
CBU_0268					240656	240705		240656	240705	Spotted	TTAAGGATTTGTTGAGACAAACTTTGCAATTAGCTCATTGGGAGTTCGCC	187		-	7	7	3	0	0	0	0	0	0	43	12	4	2	1	272.488	188	174.484
CBU_0269					240902	240951		240902	240951	Spotted	CTTTGTTGACCCAATCGACCAACAAAATTACCATGGGATTGTAATGAGCG	187		-	7	7	1	0	0	0	0	0	0	43	12	4	2	1	270.372	188	169.471
CBU_0270	221314	NP_819314.1	29653622	7195	241159	242379	+	242294	242343	Spotted	GTTTAAACGGTATCGATTATGAGAGAGGCGTTGAAATTGAGAAGGCTATT	188		-	8	8	0	0	0	0	0	0	0	74	28	2	0	0	244.662	204	99.9598	CBU_0270	hypothetical protein (NCBI)	3007	S	Uncharacterized paraquat-inducible protein B
CBU_0271	221315	NP_819315.1	29653623	7195	242867	242391	-	242784	242833	Spotted	GAAACTTAGGTCAAGATCCAGAAGTGCGTTATACCCCAAATGGAAATGCG	189	42	operon	10	8	0	0	0	2	0	0	0	184	95	29	7	0	332.978	266	172.1	ssb	single-strand binding protein (NCBI)	629	L	Single-stranded DNA-binding protein	GO:0006260,GO:0003697
CBU_0272	221316	NP_819316.1	29653624	7195	244293	242917	-	242917	242966	Spotted	AATTGCGAAAACGGATCAGACAGAGTAACCTAAAGGCCAATAGGAATTAA	189	42	operon	10	9	0	2	0	0	0	0	0	73	37	12	1	0	309.63	251	170.237	CBU_0272	major facilitator family transporter (NCBI)	2814	G	Arabinose efflux permease	GO:0006810,GO:0016021,GO:0005215
CBU_0273	221317	NP_819317.1	29653625	7195	245124	244378	-	244576	244625	Spotted	CCTATGGATTAAAAGAGAATAAAATTAAAAGAGCGGCATTCTTGTTGGGC	190		-	3	3	0	0	0	0	0	0	0	5	5	3	0	0	455.6	508	144.362	CBU_0273	hypothetical protein (NCBI)
CBU_0274	221318	NP_819318.1	29653626	7195	245376	248240	+	248037	248086	Spotted	GAGCATAATTTAGATGTGATTAAAGTAGCGGACTGGATTATCGACATGGG	191		-	10	10	0	2	1	3	0	5	0	246	159	54	7	2	366.39	321.5	175.115	uvrA	excinuclease ABC, A subunit (NCBI)	178	L	Excinuclease ATPase subunit	GO:0006289,GO:0009380,GO:0005524,GO:0016887,GO:0009381
CBU_0274a	5437814	YP_002332955.1	215918925	7195	248486	248322	-					192		-	0	0	0	0	0	0	0	0	0									CBU_0274a	hypothetical protein (RefSeq)
CBU_0275	221319	NP_819319.1	29653627	7195	248550	249635	+	249422	249471	Spotted	TTTAGATCCGGCGATTTTATTATCAAACCCTGAAAGCATATCGACAGCGG	193		-	10	10	0	4	1	0	4	7	0	225	144	37	11	9	354.769	307	193.314	hemE	uroporphyrinogen decarboxylase (NCBI)	407	H	Uroporphyrinogen-III decarboxylase	GO:0006779,GO:0004853	4.1.1.37	Uroporphyrinogen decarboxylase.
CBU_0276	221320	NP_819320.2	215918926	7195	249676	250755	+	250343	250392	Spotted	CTGAATCCATAAACCTCGATCGAAAGACTGGCATTATTGTCGACAGTTAT	194		-	10	8	2	1	0	1	1	1	0	58	27	5	4	1	313.552	236.5	188.1	CBU_0276	rubredoxin-NAD(+) reductase (RefSeq)				GO:0006118,GO:0016491	1.18.1.1	Rubredoxin--NAD(+) reductase.
CBU_0277	221321	NP_819321.1	29653629	7195	250960	250808	-	250808	250850	Spotted	TCTGCGCCGTGATTTTATTCACCTTTTGGGGTCATGGAATTAA	195		-	1	1	0	0	0	0	0	0	0	1	1	1	0	0	666	666	#DIV/0!	CBU_0277	hypothetical protein (NCBI)
CBU_0278	221322	NP_819322.1	29653630	7195	251008	251601	+	251496	251545	Spotted	TGGATTAACGGCTATTGAACGTTTAATGGGAATGATTTTAACGACGATCG	196		-	10	10	0	0	0	0	0	0	0	114	67	20	1	0	330.053	290.5	162.051	CBU_0278	membrane protein, MarC family (NCBI)	2095	U	Multiple antibiotic transporter
CBU_0279	221323	NP_819323.1	29653631	7195	252452	251625	-	251662	251711	Spotted	CAACTGGGATACGAAGTCATTATCCGCTCTGTTTCCGAATTTCGAAAAGC	197		-	7	7	0	0	0	0	0	0	0	42	24	2	0	0	292.405	260.5	119.525	CBU_0279	hypothetical protein (NCBI)	1834	E	N-Dimethylarginine dimethylaminohydrolase	GO:0005737,GO:0016813
CBU_0280	221324	NP_819324.2	215918927	7195	252514	253632	+	253583	253632	Spotted	CCTTTTCAGAAGATCCCCTGTTGGAATTACAGCGAACATTTGAATGGTGA	198		-	10	8	0	0	1	1	0	5	0	152	97	22	1	1	330.224	294.5	154.189	dinP	DNA polymerase IV (RefSeq)	389	L	Nucleotidyltransferase/DNA polymerase involved in DNA repair	GO:0006281,GO:0003889,GO:0003894,GO:0016000,GO:0016451,GO:0003890,GO:0003895,GO:0016448,GO:0016452,GO:0003891,GO:0016449,GO:0019984,GO:0003893,GO:0015999,GO:0016450	2.7.7.7	DNA-directed DNA polymerase.
CBU_0281	221325	NP_819325.1	29653633	7195	253703	254248	+	253919	253968	Spotted	TTTGAAACCGATGTCTCACTTTCTGAAATCACGATGGCTCATTTATTTCA	199		-	10	4	0	0	1	2	4	7	0	109	52	12	4	2	300.835	236	173.896	katE	catalase (NCBI)				GO:0006118,GO:0006979,GO:0004096	1.11.1.6	Catalase.
CBU_0282	221326	NP_819326.1	29653634	7195	254551	254039	-	254053	254102	Spotted	CGAGGTCCCAATTACCTTCTTTCGTATAAAATTTAACGGCAAAGCCTCGC	200		-	5	3	0	2	0	0	0	0	0	31	13	3	0	0	288.129	234	140.183	CBU_0282	hypothetical protein (NCBI)	5499	K	Predicted transcription regulator containing HTH domain
CBU_0283	221327	NP_819327.1	29653635	7195	254719	254892	+	254770	254819	Spotted	GAAAAGTCCCGCTGGGAGATTAAATATTGGTGTAATGATAAGGACGACGG	201		-	7	7	0	0	0	0	0	0	0	7	7	3	2	0	601.571	470	190.304	CBU_0283	hypothetical protein (NCBI)
CBU_0284	221328	NP_819328.1	29653636	7195	254880	255107	+	254942	254992	Spotted	GGGGTTATTTGAGCTCAGGGAAAGAAAATTTGGCTATAGAATTTACTATGC	202	43	operon	8	7	0	0	0	0	0	0	0	15	9	4	2	0	412.4	445	244.847	CBU_0284	hypothetical protein (NCBI)
CBU_0285	221329	NP_819329.1	29653637	7195	255111	255431	+	255267	255316	Spotted	ATCGGATTTAACGAATTAGTCCGCCGTTTAAATATCAGTCCAACCCAAGC	202	43	operon	7	7	0	0	0	0	0	0	0	7	7	3	2	0	601.571	472	188.12	CBU_0285	hypothetical protein (NCBI)				GO:0003677
CBU_0286	221330	NP_819330.1	29653638	7195	255663	256982	+	256743	256792	Spotted	TTAACTGCAATGATGCGTTCCGTTTGGATGTTGCAATACCATTTAGAACG	203	44	operon	10	8	0	1	0	2	0	4	0	179	102	24	7	1	320.531	268	168.975	pcnB	polyA polymerase (NCBI)	617	J	tRNA nucleotidyltransferase/poly(A) polymerase	GO:0006378,GO:0003723,GO:0004652	2.7.7.19	Polynucleotide adenylyltransferase.
CBU_0287	221331	NP_819331.1	29653639	7195	256979	257539	+	257253	257302	Spotted	CGCGGATTATCGATCTCGATATTTTATTGTATGGAGATCTTGCGCTTCAG	203	44	operon	10	10	3	2	0	0	2	1	0	168	109	45	12	4	391.667	348	207.568	folK-2	2-amino-4-hydroxy-6- hydroxymethyldihydropteridine pyrophosphokinase (NCBI)	801	H	7,8-dihydro-6-hydroxymethylpterin-pyrophosphokinase	GO:0009396,GO:0003848	2.7.6.3	2-amino-4-hydroxy-6-hydroxymethyldihydropteridine diphosphokinase.
CBU_0288	221332	NP_819332.1	29653640	7195	257536	258015	+	257902	257951	Spotted	TACAGTTATGTTTCTGGAACCATGGTAAGAGAAATCGTTACTCTCGGCGG	203	44	operon	10	8	0	1	0	0	3	3	0	268	194	82	15	4	406.019	377.5	194.12	coaD	phosphopantetheine adenylyltransferase (NCBI)	669	H	Phosphopantetheine adenylyltransferase	GO:0015937,GO:0004595	2.7.7.3	Pantetheine-phosphate adenylyltransferase.
CBU_0289	221333	NP_819333.1	29653641	7195	258030	258275	+	258103	258152	Spotted	CCATGGGCGAGTTGATTTATGAAATTAACTCTAACCGATGCACAGAGTGC	203	44	operon	10	10	0	0	0	0	0	0	0	69	41	15	4	1	371.739	314	194.411	CBU_0289	ferredoxin (NCBI)				GO:0006118,GO:0009055,GO:0051536
CBU_0290	221334	NP_819334.1	29653642	7195	258501	258289	-	258289	258339	Spotted	AGCAAATGTGGAATGCATGTACTTTTCAAAGAAAAGAAAATCCCGAAATAA	204	45	operon	1	1	0	0	0	0	0	0	0	10	1	1	1	0	245.2	172.5	207.421	rpmG	ribosomal protein L33 (NCBI)				GO:0006412,GO:0005840,GO:0003735
CBU_0291	221335	NP_819335.1	29653643	7195	258751	258512	-	258552	258586	Spotted	ATGCGAATCATCGACAAGCTCGGTATCAATGCAGT	204	45	operon	10	0	0	0	10	10	0	0	0	151	107	47	24	3	428.113	370	233.929	rpmB	ribosomal protein L28 (NCBI)	227	J	Ribosomal protein L28	GO:0006412,GO:0005840,GO:0003735
CBU_0291b	5437815	YP_002332956.1	215918928	7195	259885	259529	-					205		-	0	0	0	0	0	0	0	0	0									CBU_0291b	hypothetical protein (RefSeq)
CBU_0292	2209982			7195	259504	258845	-					206		-	0	0	0	0	0	0	0	0	0									CBU_0292
CBU_0293	221336	NP_819336.2	215918929	7195	259899	260384	+	260163	260212	Spotted	ATTGTATTGGGCAATTTAGTGGGGCTCATTGATTCGGATTATCAAGGACC	207	46	operon	10	4	0	0	2	1	6	4	0	208	123	50	12	5	367.861	306	198.812	dut	deoxyuridine 5'-triphosphate nucleotidohydrolase (RefSeq)	756	F	dUTPase	GO:0046080,GO:0004170	3.6.1.23	dUTP diphosphatase.
CBU_0294	221337	NP_819337.2	215918930	7195	260362	261777	+	261172	261223	Spotted	CAAATGATGTTATTTTCAATGGACGTATTATCTCGTTTACCGGGTTCTGATA	207	46	operon	10	10	1	0	0	0	1	4	0	165	92	30	3	2	335.121	272	174.597	CBU_0294	phosphoglucomutase (RefSeq)	1109	G	Phosphomannomutase	GO:0005975,GO:0004614,GO:0004615,GO:0016868	5.4.2.2,5.4.2.8	Phosphoglucomutase.,Phosphomannomutase.
CBU_0295	221338	NP_819338.1	29653646	7195	263243	261774	-	261829	261880	Spotted	ACCGCCTATCAATAAAGACTATTTTCAAAAGGAGTAAATCTGAAGAGACTCT	208	47	operon	4	2	0	2	0	0	0	0	1	34	10	2	1	0	251.676	194	158.607	CBU_0295	hypothetical protein (NCBI)				GO:0005488
CBU_0296	221339	NP_819339.2	215918931	7195	263887	263240	-	263295	263344	Spotted	TTCGATACCTTAATCGAAATGGCAGTTGATGAAGGTTACATTGATGAAAT	208	47	operon	10	9	0	2	0	0	3	8	0	62	40	15	10	3	406.613	333.5	245.868	pyrE	orotate phosphoribosyltransferase (RefSeq)	461	F	Orotate phosphoribosyltransferase	GO:0006221,GO:0009116,GO:0004588	2.4.2.10	Orotate phosphoribosyltransferase.
CBU_0297	221340	NP_819340.1	29653648	7195	263915	264694	+	264645	264694	Spotted	CGGATCACGCGCCGTTGATTATCGATTATGAGAGAGAAATTTCCGACTAA	209		-	10	7	1	0	0	1	2	5	0	199	122	29	3	2	334.688	296	156.689	xth	exodeoxyribonuclease III (NCBI)	708	L	Exonuclease III	GO:0006281,GO:0005622,GO:0003677,GO:0008853,GO:0004519	3.1.11.2	Exodeoxyribonuclease III.
CBU_0298	221341	NP_819341.1	29653649	7195	265792	264950	-	264965	265014	Spotted	TCGATGCTAAGAAAGTTCATTTGATTGATGGTCAGTACTCACAGTCCTTC	210	48	operon	10	3	1	0	0	0	8	1	0	185	128	57	12	4	421.324	388	207.568	murI	glutamate racemase (NCBI)	796	M	Glutamate racemase	GO:0009252,GO:0008881	5.1.1.3	Glutamate racemase.
CBU_0299	221342	NP_819342.2	215918932	7195	266511	265792	-	265896	265945	Spotted	GAACGTAGTGATGACAGACAACGATGCTTTTATTGAAATCCAAGGCACGG	210	48	operon	10	8	1	0	0	1	0	1	0	108	65	22	5	2	342.574	289	186.171	rph	ribonuclease PH (RefSeq)	689	J	RNase PH	GO:0008033,GO:0000049,GO:0009022,GO:0000175,GO:0004549	2.7.7.56	tRNA nucleotidyltransferase.
CBU_0300	221343	NP_819343.1	29653651	7195	266649	267512	+	267463	267512	Spotted	TAAAAGTGCAAATTGAACAAATGCGAGAACAGGTGCAAAACATTGAATAA	211	49	operon	10	10	0	0	0	0	0	0	0	147	97	38	6	1	375.653	344	184.768	CBU_0300	stress induced protein, putative (NCBI)	1561	S	Uncharacterized stress-induced protein	GO:0006605,GO:0016020
CBU_0301	221344	NP_819344.1	29653652	7195	267505	268125	+	268008	268057	Spotted	TAATTTTGATCAAGCCGTTCAGAATTTGATTCATATTATTAGCGCGGAAC	211	49	operon	10	5	0	1	0	1	8	3	0	306	223	93	24	7	416.523	399.5	201.74	gmk	guanylate kinase (NCBI)	194	F	Guanylate kinase	GO:0004384,GO:0004385	2.7.4.8	Guanylate kinase.
CBU_0302	221345	NP_819345.1	29653653	7195	268203	268496	+	268223	268272	Spotted	AGATTGTCTCGAACATGTCGAAAATCGCTTTGATTTAGTGCTGAAAGCAG	211	49	operon	10	4	0	0	2	4	8	4	0	138	84	31	15	8	380.413	295.5	230.144	rpoZ	rpoZ protein (NCBI)	1758	K	DNA-directed RNA polymerase, subunit K/omega	GO:0006351,GO:0003677,GO:0003902,GO:0003899,GO:0003900,GO:0003901	2.7.7.6	DNA-directed RNA polymerase.
CBU_0303	221346	NP_819346.1	29653654	7195	268550	270673	+	270624	270673	Spotted	GTTTGCGTCAGGTGAAGCAATTAGTAAGAATTATACGCCGTTTTGACTAG	211	49	operon	10	7	0	2	0	1	7	5	1	192	115	33	11	6	342.609	273	188.828	spoT	guanosine-3,5-bis(diphosphate) 3-pyrophosphohydrolase (NCBI)	317	TK	Guanosine polyphosphate pyrophosphohydrolases/synthetases	GO:0015969,GO:0003824,GO:0008893,GO:0016597	3.1.7.2	Guanosine-3',5'-bis(diphosphate) 3'-diphosphatase.
CBU_0304	221347	NP_819347.2	215918933	7195	270701	271147	+	271018	271067	Spotted	CCATTTAGTTAACGAAGTGATGAAACACTATTACGAAGAGCCTTACCCTG	211	49	operon	10	10	0	0	0	0	0	1	0	237	139	41	5	1	336.203	283	173.958	CBU_0304	putative endoribonuclease L-PSP (RefSeq)	251	J	Putative translation initiation inhibitor, yjgF family
CBU_0305	221348	NP_819348.1	29653656	7195	271154	273268	+	273219	273268	Spotted	GTTTGTTAAACCGCTGGTTGAAAGAAGCTGATAAAGTCGTCCAAGTTTAA	211	49	operon	10	8	0	0	0	0	0	6	0	257	169	73	6	1	377.654	334	185.51	recG	ATP-dependent DNA helicase RecG (NCBI)	1200	LK	RecG-like helicase	GO:0006310,GO:0006281,GO:0003676,GO:0004003,GO:0005524	3.6.1.-
CBU_0306	221349	NP_819349.1	29653657	7195	273549	273668	+	273584	273633	Spotted	TTTAAGTTGCATTGAGGGAGAAATTGCTATTAGAATATGTCCGCTCTTTG	212	50	operon	3	3	0	0	0	0	0	0	0	9	5	1	1	0	365.111	288	209.201	CBU_0306	hypothetical protein (NCBI)
CBU_0307	221350	NP_819350.1	29653658	7195	273668	274363	+	274225	274274	Spotted	GTACTACTTCACACCTAACTGGTCTGTGAATGCTCAGTACACGTTCGTAC	212	50	operon	4	3	0	1	0	0	0	0	0	38	13	1	1	0	255.605	212	131.893	CBU_0307	ompA-like transmembrane domain protein (NCBI)				GO:0009279,GO:0016021,GO:0005507
CBU_0307a	5437816	YP_002332957.1	215918935	7195	274692	274447	-					213		-	0	0	0	0	0	0	0	0	0									CBU_0307a	hypothetical protein (RefSeq)
CBU_0308					274598	274647		274598	274647	Spotted	CAACCGGCCATCTCAGTAATTCTAACTTTGAGCCTTACAGTTCAGTTATT	214		-	1	1	0	0	0	0	0	0	0	1	1	1	0	0	675	675	#DIV/0!
CBU_0309	221352	NP_819352.2	215918934	7195	274678	276648	+	276519	276568	Spotted	ATCTGATAAAACACGCTTTAATCGTTGGGCCGATTTATTGCTTAATCAAG	215		-	10	5	0	0	7	8	0	9	0	199	124	33	6	1	341.553	295	171.592	htpG	chaperone protein htpG (RefSeq)	326	O	Molecular chaperone, HSP90 family	GO:0006457,GO:0005524,GO:0051082
CBU_0310					276884	276934		276884	276934	Spotted	TGGCGAGTTTTGTAGTTGTTTCCATGTCAAATCTCCGTTTTCAACTAAAGT	216		-	1	1	0	0	0	0	0	0	0	1	1	1	0	0	675	675	#DIV/0!
CBU_0311	221354	NP_819354.2	215918936	7195	276910	277668	+	277588	277637	Spotted	GTTTCAGGAACTGTTCAAAATCCGAAACGAGTCGCAATTAACGGCATTAC	217		-	1	1	0	0	0	0	0	0	0	1	1	1	0	0	675	675	#DIV/0!	CBU_0311	outer membrane porin P1 (RefSeq)
CBU_0312	221355	NP_819355.1	29653663	7195	278678	277827	-	277917	277966	Spotted	ATAAAATAGCAGGCGATATTGATTTTGAAACGGCAAAAGAAAGAGCATCC	218		-	10	7	0	2	1	2	10	8	0	263	190	79	23	10	415.414	353	216.789	folD	folD bifunctional protein (NCBI)	190	H	5,10-methylene-tetrahydrofolate dehydrogenase/Methenyl tetrahydrofolate cyclohydrolase	GO:0009396,GO:0003824,GO:0004477,GO:0004488	1.5.1.5,3.5.4.9	Methylenetetrahydrofolate dehydrogenase (NADP(+)).,Methenyltetrahydrofolate cyclohydrolase.
CBU_0312a	5437817	YP_002332958.1	215918937	7195	278988	279107	+					219		-	0	0	0	0	0	0	0	0	0									CBU_0312a	hypothetical cytosolic protein (RefSeq)
CBU_0313	221356	NP_819356.2	215918938	7195	280875	279376	-	279384	279435	Spotted	CGCCGTTTGAATCATTTATCTGGAGATAATATTCGAATTGGACAGCAATTAA	220	51	operon	9	6	1	4	0	0	0	0	0	80	26	4	1	1	254.825	214	129.911	CBU_0313	Slt family transglycosylase (RefSeq)				GO:0016998	3.2.1.-
CBU_0314	221357	NP_819357.1	29653665	7195	281785	281012	-	281305	281354	Spotted	GTCTCCCGATCAATTTTATCACTCACTACAGAAATTAGCTTCCCTTGGCC	220	51	operon	10	10	0	0	0	0	0	0	0	108	50	10	2	0	299.481	240	151.138	CBU_0314	metallo-beta-lactamase family protein (NCBI)	491	R	Zn-dependent hydrolases, including glyoxylases	GO:0004416	3.1.2.6	Hydroxyacylglutathione hydrolase.
CBU_0315	221358	NP_819358.1	29653666	7195	281850	282581	+	282300	282349	Spotted	TGGTCGCGCGCACAAGTTAAACGTTGGTTAATTAATTTTAATTATTCCAT	221		-	4	4	0	1	0	0	0	0	0	57	13	4	3	1	237.474	175	161.26	CBU_0315	hypothetical protein (NCBI)				GO:0008152,GO:0008168
CBU_0316	221359	NP_819359.1	29653667	7195	282596	283060	+	282730	282779	Spotted	TACTACCAACAATCAGATGGAATTAACGGCCGCCATTGAGGGATTAAAAT	222		-	10	10	1	0	0	0	0	1	0	193	128	43	4	2	362.865	329	173.75	CBU_0316	ribonuclease H (NCBI)	328	L	Ribonuclease HI	GO:0003676,GO:0004523	3.1.26.4	Ribonuclease H.
CBU_0316a	5437818	YP_002332959.1	215918939	7195	283271	283119	-					223		-	0	0	0	0	0	0	0	0	0									CBU_0316a	hypothetical cytosolic protein (RefSeq)
CBU_0317	221360	NP_819360.2	215918940	7195	283478	284188	+	283955	284004	Spotted	TTACTCGATGCAGAATTATTGGCTCAAGTCTATTTATTAATGACGGGCGG	224		-	10	4	1	1	0	5	9	7	0	151	85	27	11	8	346.735	285	209.471	dnaQ	DNA polymerase III, epsilon chain (RefSeq)	847	L	DNA polymerase III, epsilon subunit and related 3'-5' exonucleases	GO:0006260,GO:0006508,GO:0005622,GO:0003677,GO:0003893,GO:0004527,GO:0015999,GO:0016450,GO:0003889,GO:0003894,GO:0016000,GO:0016451,GO:0003890,GO:0003895,GO:0016448,GO:0016452,GO:0003891,GO:0004197,GO:0016449,GO:0019984	2.7.7.7	DNA-directed DNA polymerase.
CBU_0318	221361	NP_819361.1	29653669	7195	284826	284182	-	284570	284619	Spotted	CAAAATGTGGTTCAAGATTACTCTCGATTACCGAACCAAATACGTGCGCC	225		-	1	1	0	0	0	0	0	0	0	31	5	1	0	0	210.452	178	95.5273	CBU_0318	hypothetical protein (NCBI)
CBU_0319	221362	NP_819362.1	29653670	7195	284817	284933	+	284818	284858	Spotted	TGATTTCATGGGTCGTTCCTTTATTCAAAAGTGAAAAACAC	226		-	1	1	0	0	0	0	0	0	0	1	1	1	0	0	675	675	#DIV/0!	CBU_0319	hypothetical protein (NCBI)
CBU_0320	2209983			7195	287938	284930	-					227	52	operon	0	0	0	0	0	0	0	0	0									CBU_0320
CBU_0321	221363	NP_819363.1	29653671	7195	288708	287935	-	288245	288296	Spotted	ACGCCGATCTTCATATTGATCTTTTAGAATTAGGCTATCTTTGTTTGAGTTT	227	52	operon	3	3	0	0	0	0	0	0	0	23	6	3	0	0	251.478	190	145.416	CBU_0321	hypothetical protein (NCBI)	3455	S	Uncharacterized protein conserved in bacteria
CBU_0322	221364	NP_819364.1	29653672	7195	288902	289774	+	289725	289774	Spotted	AACGCTGGGATAATGATTGGGCTCCCTATTTTCGTCAGGTATTATCATGA	228	53	operon	4	3	0	1	0	0	0	0	0	21	9	4	2	0	317.667	227	218.425	CBU_0322	hypothetical protein (NCBI)	3687	R	Predicted metal-dependent hydrolase	GO:0016491,GO:0046914
CBU_0323	221365	NP_819365.1	29653673	7195	289771	290022	+	289933	289982	Spotted	AATTTGATGGAAAACGATATTATTCATTTAGAAACCGTCGCTGAACTGGT	228	53	operon	3	3	0	0	0	0	0	0	0	3	3	3	2	0	781	869	152.42	CBU_0323	acyl carrier protein (NCBI)	236	IQ	Acyl carrier protein	GO:0048037
CBU_0324	221366	NP_819366.2	215918941	7195	290036	291682	+	291601	291650	Spotted	CTATCTCGATAACCAACTGGCACAATTGGCTTGTTGTGATCGTTTGGATC	228	53	operon	10	9	5	5	0	0	0	0	2	29	18	9	6	3	439.448	383	272.018	CBU_0324	acyl-CoA synthetase (RefSeq)	318	IQ	Acyl-CoA synthetases (AMP-forming)/AMP-acid ligases II	GO:0008152,GO:0003824
CBU_0325					291764	291798		291764	291798	Spotted	TTGCGCCAGAGACAAAAGCGATGGGGTTTCCAAAG	229		-	1	1	0	0	0	0	0	0	0	10	9	1	0	0	313.7	256	104.992
CBU_0326	221368	NP_819368.2	215918942	7195	293257	291944	-	292120	292169	Spotted	TATTCAAGGGCTCGATCAATTGTCTCTCCCAGACGTAAAAGTCTTTCATG	230		-	10	9	5	5	2	1	5	9	0	221	139	39	12	7	358.778	291	194.637	purD	phosphoribosylamine--glycine ligase (RefSeq)	151	F	Phosphoribosylamine-glycine ligase	GO:0009113,GO:0004637,GO:0005524	6.3.4.13	Phosphoribosylamine--glycine ligase.
CBU_0327	221369			7195	293341	296459	+	293957	294006	Spotted	TAGATCGTTTGTTATTCGATGACTCTGGCACTTTATCATTCGCTGGAGAG	231		-	8	8	0	0	0	0	0	0	0	10	10	4	1	0	538.3	497	154.775	CBU_0327	hypothetical protein (RefSeq)
CBU_0328					295782	295831		295782	295831	Spotted	TGGAACCAATCGAAACTTTTCCTGCATTCGTGCCAGCTATAAAATATTGA	232		-	8	8	1	0	0	0	0	0	0	10	10	4	2	1	553.9	497	183.652
CBU_0329					296398	296447		296398	296447	Spotted	ATTCAGAAGAATCCGATACCGATAATGCTCATCAACCATCGTCCCGATTG	232		-	9	9	1	0	0	0	0	0	0	10	10	7	1	1	571.5	566	161.384
CBU_0330	221372	NP_819372.2	215918943	7195	296556	298220	+	298162	298211	Spotted	AATTTTGCGCTTACAAAACGAGCCACGAGGTTAGGGATACCTTACAAAAG	233	54	operon	10	10	0	0	3	0	3	4	0	148	93	21	8	4	348.541	320	182.248	thiC	thiamine biosynthesis protein (RefSeq)	422	H	Thiamine biosynthesis protein ThiC	GO:0009228
CBU_0331	221373	NP_819373.2	215918944	7195	298220	299242	+	299192	299242	Spotted	CCAGCGTTAATTGATGAAGTTATTCACAATCTTTCAAGAGGCATTAAATGA	233	54	operon	10	10	1	2	0	0	0	0	0	38	21	8	4	3	365.526	269	253.957	CBU_0331	glycine oxidase ThiO (RefSeq)	665	E	Glycine/D-amino acid oxidases (deaminating)	GO:0043799,GO:0050660	1.4.3.19	Glycine oxidase.
CBU_0332	221374	NP_819374.1	29653682	7195	299239	299442	+	299341	299390	Spotted	GTTGCAGTGAATGAAACCGTAATTCCCGGAATTAATTACGAAAAGATTAT	233	54	operon	8	8	0	0	0	0	0	0	0	13	10	6	4	0	524.846	497	276.628	thiS	thiamine biosynthesis protein ThiS (NCBI)	2104	H	Sulfur transfer protein involved in thiamine biosynthesis	GO:0006790
CBU_0333	221375	NP_819375.1	29653683	7195	299444	300223	+	300019	300068	Spotted	TCAAGTAATGGAAATGGGTTTTGATGCGGTATTATTAAACTCAGCCGTGG	233	54	operon	10	10	1	3	3	0	1	2	0	148	92	25	5	3	339.23	277.5	182.194	thiG	thiazole synthase (NCBI)	2022	H	Uncharacterized enzyme of thiazole biosynthesis	GO:0009228,GO:0003824
CBU_0334	221376	NP_819376.1	29653684	7195	300220	301659	+	301528	301577	Spotted	ATTGGCGGTATTAATTTGAATCGATTGGAGAGCGTTTTAAATGCAGGTGC	233	54	operon	10	10	0	2	3	0	3	4	0	160	91	21	6	4	315.694	266	172.019	thiDE	phosphomethylpyrimidine kinase/thiamin-phosphate pyrophosphorylase (NCBI)	351	H	Hydroxymethylpyrimidine/phosphomethylpyrimidine kinase	GO:0009228,GO:0004789,GO:0008972	2.5.1.3,2.7.4.7	Thiamine-phosphate diphosphorylase.,Phosphomethylpyrimidine kinase.
CBU_0335	221377	NP_819377.1	29653685	7195	301737	302402	+	302344	302395	Spotted	GCGATCTTAAAGGCGGTTACAGCGAACACAGTTATAAATTACCTAATTTTAT	234		-	8	8	0	1	0	0	0	0	0	48	17	5	0	0	270.042	214	149.597	CBU_0335	acid phosphatase, class B (NCBI)				GO:0003993
CBU_0336	221378	NP_819378.2	215918945	7195	304011	302428	-	302599	302648	Spotted	CTATCTTGAAAGCAGAAGAAGCTGGATTATGGTTAACAGACGCCGTCATG	235	55	operon	10	10	1	2	4	1	6	7	0	244	163	67	19	14	393.885	319.5	222.765	purH	bifunctional phosphoribosylaminoimidazolecarboxamide formyltransferase/IMP cyclohydrolase (RefSeq)	138	F	AICAR transformylase/IMP cyclohydrolase PurH (only IMP cyclohydrolase domain in Aful)	GO:0006164,GO:0003937,GO:0004643	2.1.2.3,3.5.4.10	Phosphoribosylaminoimidazolecarboxamide formyltransferase.,IMP cyclohydrolase.
CBU_0337	221379	NP_819379.1	29653687	7195	304303	303992	-	304235	304284	Spotted	TGGAAGCTGATACATTGATTCAAGAACCTGAAGTTATTAAGCCGGTTGAA	235	55	operon	10	6	0	1	4	2	0	0	0	120	60	12	3	1	301.6	251.5	152.138	fis	DNA-binding protein Fis (NCBI)	2901	KL	Factor for inversion stimulation Fis, transcriptional activator	GO:0006355,GO:0003700
CBU_0338	221380	NP_819380.2	215918946	7195	304467	307172	+	307123	307172	Spotted	AGCGTTTGTCGTCGGATGTTTACGAGATTGTGACAAAGAGTCTCTTGTAG	236		-	10	4	0	0	0	0	6	1	0	98	57	19	7	0	343.592	273.5	195.218	pepN	membrane alanine aminopeptidase (RefSeq)	308	E	Aminopeptidase N	GO:0006508,GO:0004179,GO:0008270	3.4.11.2	Membrane alanyl aminopeptidase.
CBU_0339	221381	NP_819381.1	29653689	7195	307955	307194	-	307374	307425	Spotted	CGCACCAGCCATACAAGAGATTCTCAATAATATTACGAATCTTATCCAAAAT	237		-	1	1	0	0	0	0	0	0	0	1	1	1	0	0	569	569	#DIV/0!	CBU_0339	hypothetical protein (NCBI)
CBU_0340	221382	NP_819382.1	29653690	7195	308186	309124	+	309074	309124	Spotted	GGTGAACGGCTTATTGATGCTAGTACTTTAGAAGAGGTATTTCACGATTAA	238		-	1	1	0	0	0	0	0	0	0	12	2	1	0	0	217.417	173	118.011	CBU_0340	hypothetical protein (NCBI)
CBU_0341	221383	NP_819383.2	215918947	7195	310164	309166	-	309697	309746	Spotted	TTCAAGGAACGGATTATTGCATTGGTTTTGATACGGCTTGTAATACAGCT	239		-	10	8	0	1	4	1	4	7	1	159	103	34	10	3	374.623	324	196.562	pfkA	6-phosphofructokinase (RefSeq)	205	G	6-phosphofructokinase	GO:0006096,GO:0006002,GO:0005945,GO:0003872,GO:0005524	2.7.1.11	6-phosphofructokinase.
CBU_0342	221384	NP_819384.1	29653692	7195	310148	310264	+	310179	310204	Spotted	CACCATTCTATGATGCCTTTTTCAAT	240		-	2	2	0	0	0	0	0	0	0	3	3	1	0	0	453	425	209.409	CBU_0342	hypothetical protein (NCBI)
CBU_0343	221385	NP_819385.1	29653693	7195	310601	311482	+	311303	311352	Spotted	ATCCGTTCCTTAACGTCGTTAAACGAACAGCAACTGCAATATTTAACTCC	241		-	2	2	0	0	0	0	0	0	0	3	3	0	0	0	404.333	425	46.5761	CBU_0343	hypothetical protein (NCBI)
CBU_0344	221386			7195	311577	312111	+	312046	312095	Spotted	GTTATCAAAACTATGCTAAATAACAATGAGAGCGAATTGGGCACAGCGAT	242		-	2	2	0	0	0	0	0	0	0	3	2	0	0	0	308.333	259	112.434	CBU_0344	hypothetical protein (RefSeq)
CBU_0344a	5437819			7195	313311	312112	-					243		-	0	0	0	0	0	0	0	0	0									CBU_0344a
CBU_0346	221387	NP_819387.1	29653695	7195	314966	313482	-	313940	313989	Spotted	AACTAATCCTAACATCCCTATTTTCCTGCCTTATTTATCCGGCGAACGCA	244	56	operon	10	9	0	0	0	0	2	1	0	58	28	8	5	2	331.328	245.5	208.615	xylB	xylulokinase (NCBI)	1070	G	Sugar (pentulose and hexulose) kinases	GO:0005997,GO:0004856	2.7.1.17	Xylulokinase.
CBU_0347	221388	NP_819388.2	215918948	7195	316362	314971	-	314989	315040	Spotted	AGGGGTAACCTTGGAGCAAATTGAAGAGAATCTCTATGCAGGAAAAGACATG	244	56	operon	7	7	0	0	0	0	0	1	0	60	23	7	2	1	294.017	229.5	165.061	CBU_0347	D-xylose-proton symporter (RefSeq)	2814	G	Arabinose efflux permease	GO:0008643,GO:0016021,GO:0005351
CBU_0348					316226	316268		316226	316268	Spotted	GATACGACACCGGTGTTATTTCGGGCGCCATTTTATTCATTAG	245		-	7	7	0	0	0	0	0	0	0	11	9	6	5	0	539.909	642	256.364
CBU_0349	221390	NP_819390.1	29653698	7195	317086	316403	-	316403	316452	Spotted	AATCGCCGTTAGAGTTGATTGATTGGTTGAAAGGAAACGAAAACACCTGA	246	57	operon	10	10	0	0	0	0	0	0	0	132	78	17	5	1	329.167	286	166.888	gph	phosphoglycolate phosphatase (NCBI)	546	R	Predicted phosphatases	GO:0008152,GO:0008967	3.1.3.18	Phosphoglycolate phosphatase.
CBU_0350	221391	NP_819391.1	29653699	7195	317783	317079	-	317251	317300	Spotted	TTGTACACGATCGTTGGCGCCGAATATGTATTTAATTTATTGCCCAAAGG	246	57	operon	10	1	0	5	1	1	7	5	0	118	84	45	24	6	468.907	394	265.667	ubiG	3-demethylubiquinone-9 3-methyltransferase (NCBI)	2227	H	2-polyprenyl-3-methyl-5-hydroxy-6-metoxy-1,4-benzoquinol methylase	GO:0006744,GO:0008425,GO:0008689,GO:0008757	2.1.1.64,2.1.1.-	3-demethylubiquinone-9 3-O-methyltransferase.,
CBU_0351	221392	NP_819392.1	29653700	7195	318123	317770	-	317877	317926	Spotted	TACACCTCATTTGAAACATTTATCGCAAGAATTAGAAGAAGCTTTGAAGC	246	57	operon	7	7	0	0	0	0	0	0	0	37	10	6	3	0	299.243	191	221.019	CBU_0351	Hpt domain protein (NCBI)	2198	T	FOG: HPt domain
CBU_0352	221393	NP_819393.1	29653701	7195	319062	318169	-	318209	318258	Spotted	TCGACCTTGAAACAACAATATGATATTGATCATATTACGCTTCAGCCTGA	247		-	10	10	0	0	0	0	0	1	0	140	96	24	0	0	350.779	311.5	153.393	CBU_0352	cation-efflux family protein (NCBI)	1230	P	Co/Zn/Cd efflux system component	GO:0006812,GO:0016020,GO:0008324
CBU_0353	221394	NP_819394.1	29653702	7195	320215	319199	-	319237	319286	Spotted	ATATAAACGTAAACCACCTTTAGCTGAACGTGTTTCTCACAACGCCAGTC	248		-	10	10	0	0	0	0	0	1	0	81	44	11	0	0	320.173	278	141.736	CBU_0353	sohB protein (NCBI)	616	OU	Periplasmic serine proteases (ClpP class)	GO:0006508,GO:0008233	3.4.21.-
CBU_0354	221395	NP_819395.2	215918949	7195	320424	322001	+	321880	321929	Spotted	ACCTAATTCCCTTTGGTTGGGATTTTATTGTTATTGCATCCTTTAGCGCC	249		-	3	3	0	0	0	0	0	0	0	22	11	3	0	0	283.364	246	140.049	CBU_0354	amino acid permease (RefSeq)	1113	E	Gamma-aminobutyrate permease and related permeases	GO:0006865,GO:0016020,GO:0015171
CBU_0355	221396			7195	322077	323959	+	322986	323035	Spotted	CAAACAATTATGGCGCTAATGCCTTCCATTTTGCTGCTAAAAGTGGATCG	250		-	10	4	1	7	0	0	0	0	1	61	25	7	1	1	294.656	236	173.153	CBU_0355	Ankyrin repeat/F-box domain protein (RefSeq)
CBU_0356					323864	323913		323864	323913	Spotted	CTAATTAAAAGGGTACTTGCAATGCCTTTTGAAGAACTAATGCTCGAAAC	251		-	10	2	1	9	0	0	0	0	1	44	20	11	1	1	344.341	238	215.232
CBU_0357	221398	NP_819398.1	29653706	7195	324094	324321	+	324214	324263	Spotted	CTCTATCCAAGGTGGTTAACTCTTGATAAGGGTCCGGTAAAAGAGGTTGC	252		-	2	2	0	0	0	0	0	0	0	11	4	1	0	0	270.909	199	123.448	CBU_0357	hypothetical protein (NCBI)
CBU_0358	221399			7195	325612	324469	-	324474	324525	Spotted	CGAGATTATCCACTTGGCTGGAAAATATTATTAAATAGTGCCACAGCAATTA	253		-	4	4	0	0	0	0	0	0	0	6	4	3	2	0	525.667	568.5	300.392	CBU_0358	hypothetical protein (RefSeq)
CBU_0359					324674	324723		324674	324723	Spotted	TGTTGATGTTTTCTACTTTTGTCGGTTGCTGTCGACTTTGCCTTCGATAA	254		-	4	4	0	0	0	0	0	0	0	6	4	3	2	0	526.667	568.5	299.026
CBU_0360	221401			7195	326926	325635	-	325635	325684	Spotted	ATGAGGATACGTCTGAGGTTTTGGATGAAATTTCTCTTGGGTTAACTTAA	255		-	4	4	1	0	0	0	0	0	0	6	4	3	3	1	563.333	634	325.106	CBU_0360	hypothetical protein (RefSeq)
CBU_0361					326755	326804		326755	326804	Spotted	CTTTTCCTCATCGGATACGCTCAATTCTGCAATTGATAGTGCTTGGTTCC	256		-	4	4	1	0	0	0	0	0	0	4	4	4	1	1	718.75	691	169.219
CBU_0362	221403	NP_819403.1	29653711	7195	328273	327068	-	327163	327212	Spotted	TATGGTCCATACCAGCACCTATGATTTCTGTGATGATGCCATTCCTATTG	257		-	10	10	0	0	0	0	0	0	0	146	71	18	0	0	303.527	242	147.059	CBU_0362	hippurate hydrolase, putative (NCBI)	1473	R	Metal-dependent amidase/aminoacylase/carboxypeptidase	GO:0006508,GO:0008237,GO:0046983,GO:0047980	3.5.1.32	Hippurate hydrolase.
CBU_0363	2209985			7195	329121	328191	-					258		-	0	0	0	0	0	0	0	0	0									CBU_0363
CBU_0364	221404	NP_819404.2	215918950	7195	330686	329355	-	329550	329599	Spotted	ATGCAACGACTTTTCTGATTCCTTCCGAAATATACCCCATTCACCTACGT	259		-	2	1	0	0	0	1	0	1	0	31	4	1	0	0	208.258	176	99.651	CBU_0364	phosphate transporter (RefSeq)	2223	P	Nitrate/nitrite transporter	GO:0006810,GO:0016021,GO:0005215
CBU_0365	221405	NP_819405.1	29653713	7195	330772	330864	+	330815	330864	Spotted	CTGTTGATCGTGTCTTAGAGCAATATTCCGAGCTGGTTGAAATCGTTTAG	260		-	1	1	0	0	0	0	0	0	0	1	1	1	0	0	655	655	#DIV/0!	CBU_0365	hypothetical protein (NCBI)
CBU_0366	221406	NP_819406.1	29653714	7195	331619	330861	-	331078	331127	Spotted	CGGATTAATGTGAAATGGTATCGAGATGACGATCACGCCGTATTTAGTGT	261	58	operon	10	9	4	4	0	1	0	3	0	143	60	7	4	4	267.378	226	143.293	CBU_0366	sensor histidine kinase PhoR protein, putative (NCBI)	642	T	Signal transduction histidine kinase	GO:0000160,GO:0016310,GO:0018106,GO:0007165,GO:0016020,GO:0000155,GO:0005524	2.7.13.3	Histidine kinase.
CBU_0367	221407	NP_819407.1	29653715	7195	332346	331600	-	331686	331735	Spotted	TATCGATGATCGTACGGTTGATGTCCAAGTTCGTCGATTGCGTGATAAAT	261	58	operon	6	5	1	4	0	1	0	3	0	70	13	4	2	1	238.029	186.5	149.787	phoB	DNA-binding response regulator PhoB (NCBI)	745	TK	Response regulators consisting of a CheY-like receiver domain and a winged-helix DNA-binding domain	GO:0000160,GO:0006355,GO:0000156,GO:0003677
CBU_0368	221408	NP_819408.2	215918951	7195	332398	333582	+	333199	333248	Spotted	TCAACGGAACATGGGTCTGATGCGCATGATGAAATTAATCTAATAAAACC	262		-	9	9	0	0	0	0	0	0	0	48	20	3	0	0	280.375	234	123.831	CBU_0368	glucose/sorbosone dehydrogenase (RefSeq)	2133	G	Glucose/sorbosone dehydrogenases	GO:0003824
CBU_0369	221409	NP_819409.1	29653717	7195	333689	333585	-	333585	333624	Spotted	AGAAGAGTGCTCGCCTATCCTCTTTGTTCGCTCGGAATAA	263		-	2	2	0	0	0	0	0	0	0	4	4	2	0	0	450.25	435.5	171.913	CBU_0369	hypothetical protein (NCBI)
CBU_0370	221410	NP_819410.1	29653718	7195	333980	333753	-	333903	333952	Spotted	TTCTTACCGCCCTATCATTATCCTTAGTGTTTGGCTTAACAGGCTGTGAC	264		-	3	3	0	0	0	0	0	0	0	4	4	2	0	0	519.5	550.5	166.318	CBU_0370	lipoprotein, putative (NCBI)				GO:0019867
CBU_0371	221411	NP_819411.1	29653719	7195	335245	334052	-	334072	334123	Spotted	GCGATGGCCTACTTATGCATTAATCTATTTTGTTTAATCGCTTATTATGGCT	265		-	3	3	0	0	0	0	0	0	0	18	9	3	0	0	289.722	249.5	151.171	CBU_0371	transporter, putative (NCBI)	2814	G	Arabinose efflux permease	GO:0006810,GO:0016021,GO:0005215
CBU_0372	221412	NP_819412.1	29653720	7195	336712	335348	-	335353	335403	Spotted	CCTTGTGTAAAATCTTACATTGTGAACAAAATTTGGAGAATCGGTTTTCCT	266		-	3	3	0	0	0	0	0	0	0	4	4	2	0	0	488	496.5	98.3972	CBU_0372	hypothetical protein (NCBI)
CBU_0373	221413	NP_819413.1	29653721	7195	337383	336859	-	336894	336943	Spotted	CAGTCAAGTCATTATCTTCGAACGCACTATCCTAATCCCTCGCAAAGGTC	267		-	10	10	0	0	0	0	0	0	0	45	21	4	0	0	290.844	240	134.62	CBU_0373	MaoC domain protein (NCBI)	2030	I	Acyl dehydratase	GO:0008152,GO:0016491
CBU_0374	2209986			7195	338232	337367	-					268		-	0	0	0	0	0	0	0	0	0									CBU_0374
CBU_0375	221414			7195	338887	339609	+	339260	339309	Spotted	TTTACGGAGTTGATATACCGCTAACGCAAGAGACACGTCAATTAATGAGA	269		-	1	1	1	0	0	0	0	0	0	4	3	1	1	1	445.25	328.5	336.865	CBU_0375	hypothetical protein (RefSeq)
CBU_0376					339456	339505		339456	339505	Spotted	TATAGAACAACATTTGGTGCCTTCAGAGTTTGTAAACCGATATCGCGCTG	270		-	2	2	1	0	0	0	0	0	0	3	3	1	1	1	568	457	326.951
CBU_0377	221416	NP_819416.1	29653724	7195	339869	340090	+	339961	340010	Spotted	CGAAGAATTGCAGAAGGGAATGAAAGATAGATACGTTACTCATGCTGAGC	271		-	2	2	0	0	0	0	0	0	0	4	3	1	0	0	384	420.5	156.156	CBU_0377	hypothetical protein (NCBI)
CBU_0378	221417	NP_819417.1	29653725	7195	340247	340669	+	340489	340539	Spotted	TTATCTGCCAGCTAATAGATTGGTTCACTCTAAAACAAAATCGATGGCGTT	272		-	1	1	0	0	0	0	0	0	0	23	5	1	0	0	222.348	196	81.4324	CBU_0378	lipoprotein, putative (NCBI)
CBU_0379	221418	NP_819418.1	29653726	7195	341457	340684	-	340875	340924	Spotted	GCGCAGACTTTCTAATGAGACGACTGATATTCGGTGGTTACAAAGACATT	273		-	10	7	0	1	2	0	1	0	0	102	55	8	2	0	304.471	261	137.148	ampD	N-acetylmuramoyl-L-alanine amidase (NCBI)	3023	V	Negative regulator of beta-lactamase expression	GO:0009253,GO:0008745	3.5.1.28	N-acetylmuramoyl-L-alanine amidase.
CBU_0380	221419	NP_819419.1	29653727	7195	341599	341474	-	341525	341576	Spotted	TTCAAAATTTCCCTTACATAAAACTACTCTATTATCGCAAGTTTGGGTCGAT	274		-	2	2	0	0	0	0	0	0	0	2	2	2	1	0	727	727	110.309	CBU_0380	hypothetical protein (NCBI)
CBU_0381	221420	NP_819420.2	215918952	7195	341677	342240	+	341861	341912	Spotted	CGGCCAAACCAACCATTGATATTATTCTTGAAGTGAAAGATATACGATTAGT	275		-	7	6	1	0	0	0	0	0	0	23	13	4	1	0	345.609	266	181.585	grpB	glutamate-rich protein (RefSeq)	2320	S	Uncharacterized conserved protein
CBU_0382	221421	NP_819421.1	29653729	7195	344022	343024	-	343325	343374	Spotted	TACCAAATTATTGACGATCTTTTAGATTACAGTAAAGATGCTTCGGCGCT	276		-	10	0	2	1	1	0	0	2	0	230	141	41	3	1	337.8	300	164.708	ispB	octylprenyl diphosphate synthase-like protein (NCBI)	142	H	Geranylgeranyl pyrophosphate synthase	GO:0008299	2.5.1.-
CBU_0383	221422	NP_819422.2	215918953	7195	344088	344726	+	344357	344407	Spotted	GCGTAAAATAGACCGCTTATTAGAAAATGCTGGCATTATTCGCAATAAATT	277		-	10	9	0	0	0	0	0	1	0	101	68	20	1	0	367.752	328	164.336	tag	DNA-3-methyladenine glycosylase I (RefSeq)	2818	L	3-methyladenine DNA glycosylase	GO:0006284,GO:0008725	3.2.2.20	DNA-3-methyladenine glycosylase I.
CBU_0384	221423	NP_819423.2	215918954	7195	345003	346097	+					278		-	1	1	0	0	0	0	0	0	0	2	2	0	0	0	380	380	56.5685	CBU_0384	IS1111A transposase (RefSeq)	3547	L	Transposase and inactivated derivatives	GO:0006313,GO:0003677,GO:0004803
CBU_0384a	5437820	YP_002332960.1	215918955	7195	346366	346094	-					279		-	0	0	0	0	0	0	0	0	0									CBU_0384a	hypothetical protein (RefSeq)
CBU_0384b	5437821	YP_002332961.1	215918956	7195	346413	346598	+					280		-	0	0	0	0	0	0	0	0	0									CBU_0384b	hypothetical protein (RefSeq)
CBU_0385	221424	NP_819424.2	215918957	7195	346685	347038	+	346959	347008	Spotted	GACAAGACTTTACCGCAGTTAAAATTACGGAAATAGCACTAGGAAAGGCG	281	59	operon	10	9	0	1	8	10	0	3	0	275	175	71	35	14	397.56	325	231.467	rplU	LSU ribosomal protein L21P (RefSeq)	261	J	Ribosomal protein L21	GO:0006412,GO:0005840,GO:0003723,GO:0003735
CBU_0386	221425	NP_819425.1	29653733	7195	347028	347300	+	347196	347245	Spotted	CATACCTTGTATGCTTTGATCGAAGGCAAAGTAAAATTTACACGCAAGGG	281	59	operon	10	9	0	2	7	10	0	4	0	258	177	64	35	10	403.043	338	228.598	rpmA	50S ribosomal protein L27 (NCBI)	211	J	Ribosomal protein L27	GO:0006412,GO:0005840,GO:0003735
CBU_0387	221426	NP_819426.1	29653734	7195	347465	348484	+	348405	348454	Spotted	CTGCGATTAAACGTCAAGGTACAGAATTGTTGTGTTATGACTTAATGTCA	281	59	operon	10	10	0	0	0	2	0	3	0	275	184	67	6	0	366.949	329	176.301	CBU_0387	GTP-binding protein, GTP1/Obg family (NCBI)	536	R	Predicted GTPase	GO:0005622,GO:0005525
CBU_0388	221427	NP_819427.1	29653735	7195	348584	352762	+	352683	352732	Spotted	AGGAACACAGTTACTCCTCCGATACAAATAGTGAAAATGAGCGCAAAATT	282		-	1	1	0	0	0	0	0	0	0	3	3	1	0	0	452.333	380	125.285	CBU_0388	hypothetical protein (NCBI)
CBU_0389	221428	NP_819428.1	29653736	7195	353040	352768	-	352858	352907	Spotted	GTGCTGCTCAAAGTGCTTATCAACATGCGGTTCAAATATTAGACAAAGCG	283		-	10	7	0	1	5	9	0	4	0	160	112	49	22	2	417.856	369	221.812	rpsT	ribosomal protein S20 (NCBI)	268	J	Ribosomal protein S20	GO:0006412,GO:0005840,GO:0003723,GO:0003735
CBU_0390	221429	NP_819429.1	29653737	7195	353284	354831	+	354580	354631	Spotted	CGGGATAAGATTTATCAACCTTTGCCTCATTGGACGAAATTAATTTTACGTT	284	60	operon	10	10	0	1	0	0	0	0	0	229	145	55	3	1	366.712	318	179.185	mviN	integral membrane protein MviN (NCBI)	728	R	Uncharacterized membrane protein, putative virulence factor	GO:0009405,GO:0016021
CBU_0391	221430	NP_819430.2	215918958	7195	354828	355865	+	355760	355809	Spotted	TGATTCGATAAGCGCTTTAATCGAACAAATGCACCGCGACGTTATTGAAG	284	60	operon	10	10	1	1	2	0	1	3	0	248	149	60	11	3	367.883	305	191.137	ribF	FMN adenylyltransferase (RefSeq)	196	H	FAD synthase	GO:0009231,GO:0003919,GO:0008531	2.7.1.26,2.7.7.2	Riboflavin kinase.,FAD synthetase.
CBU_0392	221431			7195	357733	356007	-	356007	356056	Spotted	AGAACGCTTGCACTCAGTTTAAAGAAAAGCTAACAACTGAGCCAGAATAA	285		-	3	3	1	0	0	0	0	0	1	7	7	2	1	1	431.571	304	235.411	CBU_0392	hypothetical protein (RefSeq)
CBU_0393					357376	357425		357376	357425	Spotted	TCAGTTATTGAAAATCCTCAAAACCGTATCCTCTCAGCCTGAACACCGAG	286		-	3	3	1	0	0	0	0	0	1	7	7	2	1	1	470.571	340	228.351
CBU_0394	221433	NP_819433.1	29653741	7195	357947	357828	-	357882	357911	Spotted	TTAATATCCTTACAGGTCATCCCCGCGCAG	287		-	6	6	0	0	0	0	0	0	0	7	7	3	0	0	497	450	100.278	CBU_0394	hypothetical protein (NCBI)
CBU_0395	221434	NP_819434.1	29653742	7195	358040	358726	+	358649	358698	Spotted	TTTCTCAACCAATCTATCTTTGGTAAAGGCAAAGTTGAAAAGGGAAGCGC	288		-	9	9	0	0	0	0	0	0	0	36	19	5	0	0	306.139	255	141.555	CBU_0395	lipoprotein, putative (NCBI)
CBU_0396	221435	NP_819435.1	29653743	7195	358839	361649	+	361488	361537	Spotted	CTTCCTGGTTTGGCGTTAGAAATTAACGTGTCTGAATTTGAAAAGTGCGC	289	61	operon	10	8	0	1	2	0	2	5	1	236	169	61	10	1	381.475	339.5	178.715	ileS	isoleucyl-tRNA synthetase (NCBI)	60	J	Isoleucyl-tRNA synthetase	GO:0006428,GO:0005737,GO:0004822,GO:0008270,GO:0005524	6.1.1.5	Isoleucine--tRNA ligase.
CBU_0397	221436	NP_819436.2	215918959	7195	361652	362149	+	362005	362056	Spotted	TCGTTGGAGTTACGTGACCGATTTTATTGATTTTCATATTAAAGATTGGCAT	289	61	operon	10	10		2	1	0	0	4	0	241	143	41	7	1	344.012	301	171.659	lspA	lipoprotein signal peptidase (RefSeq)	597	MU	Lipoprotein signal peptidase	GO:0006508,GO:0016020,GO:0009005	3.4.23.36	Signal peptidase II.
CBU_0398	221437	NP_819437.1	29653745	7195	362161	362709	+	362553	362602	Spotted	ATCGTCGATAAGTCTCATTCCTCTCTATGATGGAGTCAAACCCTTTGCTC	290		-	5	5	0	0	0	0	0	0	0	9	9	4	3	0	518	421	226.08	CBU_0398	hypothetical protein (NCBI)
CBU_0399					362781	362817		362781	362817	Spotted	CGAAGGCGAAACTGCTATCGCTAAGGACGATAACATC	291		-	0	0	0	0	0	0	0	0	0
CBU_0400	221439	NP_819439.1	29653747	7195	362731	363210	+	363100	363149	Spotted	CAACCGCCTACTATTACTACCTCAGATGGAAAGACTTATCGAGCGTTTGC	292	62	operon	5	5	0	0	0	0	0	0	0	9	9	3	1	0	495.111	400	202.697	CBU_0400	hypothetical protein (NCBI)
CBU_0400a	5437822	YP_002332962.1	215918960	7195	363207	363356	+					292	62	operon	0	0	0	0	0	0	0	0	0									CBU_0400a	hypothetical protein (RefSeq)
CBU_0401					363309	363358		363309	363358	Spotted	TATTATTTTGGCAGCTCAAGATCAAGGGCACAACCTGGATAATCAAAGGC	293		-	4	4	0	0	0	0	0	0	0	4	4	4	0	0	633.5	668.5	73.8489
CBU_0402	221441	NP_819441.1	29653749	7195	363394	363501	+	363436	363487	Spotted	GGCAATTACACATTTTATCACTGGATAGCCTTTGATAAAATAAAACCCCATT	294	63	operon	4	4	0	0	0	0	0	0	0	4	4	4	2	0	764.5	764	112.299	CBU_0402	hypothetical protein (NCBI)
CBU_0403	221442	NP_819442.1	29653750	7195	363498	363635	+	363547	363589	Spotted	AACTTTGTCATGCCTTTAACGACAAACCACAGGTCATGATGCG	294	63	operon	5	5	0	0	0	0	0	0	0	9	9	4	2	0	529.778	400	236.349	CBU_0403	hypothetical protein (NCBI)
CBU_0404	221443			7195	363641	365028	+	364465	364514	Spotted	TGAAGATAATGGCGATCCAGCTGAAATGCTAAATTTGGGATCCGTTATTG	294	63	operon	7	6	1	2	0	0	0	0	0	33	12	5	3	1	307.939	206	222.858	CBU_0404	streptomycin-6-phosphotransferase, putative (RefSeq)				GO:0006468,GO:0019748,GO:0016773
CBU_0405					364909	364958		364909	364958	Spotted	ATTGTATGGTCTGATCCTGAAACCGAAGCATTTTATATCAAAATGGGGTG	295			9	5	1	4	0	0	0	0	0	22	8	5	1	1	318.636	211	220.107
CBU_0406					365052	365101		365052	365101	Spotted	TACAGGAAAATAGACGAACTCACTTCAGTCCAAACCATGACTATCGGTGC	295			1	1	0	0	0	0	0	0	0	1	1	1	1	0	869	869	#DIV/0!
CBU_0407	221446	NP_819446.1	29653754	7195	365301	365200	-	365241	365292	Spotted	GGGACTTTAATGCCTATAGCTGCTATTATTTTTGCTTTGACGCTGATAAATA	296		-	1	1	0	0	0	0	0	0	0	1	1	1	1	0	869	869	#DIV/0!	CBU_0407	hypothetical protein (NCBI)
CBU_0407a	5437823			7195	365791	365294	-					297		-	0	0	0	0	0	0	0	0	0									CBU_0407a
CBU_0409	221447	NP_819447.1	29653755	7195	365958	365803	-	365833	365882	Spotted	TTCTGGTATTGCTTTCTATTATTGCAATGCAAGTGGTTTTTAAAGAGCCT	298		-	1	1	0	0	0	0	0	0	0	2	2	0	0	0	394.5	394.5	77.0746	CBU_0409	hypothetical protein (NCBI)				GO:0006810,GO:0016021,GO:0005215
CBU_0410	221448	NP_819448.1	29653756	7195	367970	366234	-	366267	366316	Spotted	ACTCGGAAAATAAACCGTATTCTAAAGGGAATCGCCTAATACCGGGTTCT	299		-	2	2	0	0	0	0	0	0	0	3	3	1	0	0	470.667	449	126.895	CBU_0410	hypothetical protein (NCBI)
CBU_0411	221449	NP_819449.1	29653757	7195	368162	368257	+	368224	368257	Spotted	TAATTTACCACCTAAAAATGGGGCAGCAATATAG	300		-	1	1	0	0	0	0	0	0	0	2	2	1	0	0	473.5	473.5	188.798	CBU_0411	hypothetical protein (NCBI)
CBU_0412	221450	NP_819450.1	29653758	7195	368795	368385	-	368407	368456	Spotted	GATCACTGTGGAACATTATCAATCGATCAATCGGGTCACCAAAAGGCAAG	301		-	5	4	0	1	0	0	0	1	0	34	14	2	1	0	276.5	239	134.863	CBU_0412	pilin, putative (NCBI)	4968	NU	Tfp pilus assembly protein PilE
CBU_0413	221451			7195	369155	370404	+	369578	369627	Spotted	TACAAGCGGTTAATCAATGGCCTAAACTATGGAATGAAATGGAGAAAGTC	302		-	1	1	1	0	0	0	0	0	0	2	2	1	1	1	642.5	642.5	464.569	CBU_0413	hypothetical protein (RefSeq)
CBU_0414					370300	370349		370300	370349	Spotted	TATTCTCCGGTTTTGTTAAATGCGATGAAGCGAGTTCAGGATTTATTTGG	303			1	1	0	0	0	0	0	0	0	2	2	1	1	1	642.5	642.5	464.569
CBU_0415	221453	NP_819453.2	215918961	7195	370990	370484	-	370751	370800	Spotted	CCGATTTAGGCCACATTCGTAAAGAAGATTCCAAATTATCCCAACCCAGC	304		-	0	0	0	0	0	0	0	0	0	8	3	0	0	0	212.5	198.5	56.432	CBU_0415	guanine deaminase (RefSeq)	590	FJ	Cytosine/adenosine deaminases	GO:0008270,GO:0016787	3.5.4.3	Guanine deaminase.
CBU_0416	221454	NP_819454.2	215918962	7195	371308	371490	+	371328	371377	Spotted	ACAGAATAGAAAACCGTCCATTGATGTCATATCATTACCACCAGCACAGC	305		-	1	1	0	0	0	0	0	0	0	2	2	1	0	0	493.5	493.5	269.408	CBU_0416	hypothetical protein (RefSeq)
CBU_0417	221455	NP_819455.2	215918963	7195	371542	371679	+	371602	371626	Spotted	ACGGTGTGCGCTGGGTCTCGCCTAC	306		-	1	1	0	0	0	0	0	0	0	2	2	1	0	0	473.5	473.5	297.692	CBU_0417	hypothetical protein (RefSeq)
CBU_0418	221456	NP_819456.1	29653764	7195	372573	371728	-	371753	371802	Spotted	ACCGGCGAACAAGCTTTATTAACCAGGAAAATTTTAGAAACCTACGAATG	307		-	10	8	1	2	0	0	5	7	0	178	109	31	7	3	350.146	303	185.347	CBU_0418	4-amino-4-deoxychorismate lyase, putative (NCBI)	115	EH	Branched-chain amino acid aminotransferase/4-amino-4-deoxychorismate lyase	GO:0008152,GO:0003824
CBU_0419	221457	NP_819457.1	29653765	7195	373506	372676	-	372685	372736	Spotted	TCTCCAAGATCCTTATTATAAATACGCAAAATCAAACTCTACAGAGAGCACA	308		-	7	7	0	1	0	0	0	0	0	43	13	7	0	0	262.605	206	146.906	CBU_0419	polysaccharide deacetylase-related protein (NCBI)	726	G	Predicted xylanase/chitin deacetylase	GO:0005975,GO:0016810
CBU_0420	221458			7195	375339	373584	-	373594	373643	Spotted	CTAAATAAAAGAGAAGACATTTATATCGATAGCAGCGAAAACCCTCTCCG	309	64	operon	7	7	1	0	0	0	0	0	0	9	9	5	1	1	579.778	634	223.504	CBU_0420	hypothetical protein (RefSeq)
CBU_0421					373822	373871		373822	373871	Spotted	AAGTTGCGCGCTACAAAATTCTGCATACCGTTTATTACCAGTCTCATCTC	310	64	operon	7	7	1	1	0	0	0	0	0	47	15	6	4	1	284.362	207	204.734
CBU_0422	221460	NP_819460.1	29653768	7195	375681	375346	-	375499	375548	Spotted	AGATAGTTAATCTCAACAATGGCGAACGCCTAGAAACCTATGTCATCCCG	311	64	operon	10	6	0	1	0	1	8	2	0	178	137	53	14	5	417.607	355	206.051	panD	aspartate 1-decarboxylase precursor (NCBI)	853	H	Aspartate 1-decarboxylase	GO:0006523,GO:0004068,GO:0005488	4.1.1.11	Aspartate 1-decarboxylase.
CBU_0423	221461	NP_819461.1	29653769	7195	376448	375675	-	375747	375796	Spotted	TTCAGGAAGGGATTATTGTCGATTACATTGAAGATTATAACGAACGGCGT	311	64	operon	10	9	1	3	0	2	2	3	0	200	132	62	9	4	394.575	343.5	199.164	panC	pantoate--beta-alanine ligase (NCBI)	414	H	Panthothenate synthetase	GO:0015940,GO:0004592	6.3.2.1	Pantoate--beta-alanine ligase.
CBU_0424	221462	NP_819462.1	29653770	7195	377259	376459	-	376459	376508	Spotted	AGGAAGTGAAAACCTCCACTTATCCACATCTCGAAACACATTGTTATTGA	311	64	operon	10	10	0	1	0	1	0	2	0	182	123	50	50	2	385.698	339	191.953	panB	3-methyl-2-oxobutanoate hydroxymethyltransferase (NCBI)	413	H	Ketopantoate hydroxymethyltransferase	GO:0015940,GO:0003864	2.1.2.11	3-methyl-2-oxobutanoate hydroxymethyltransferase.
CBU_0425	221463	NP_819463.1	29653771	7195	378718	377351	-	377473	377522	Spotted	GGTTAAAGACGTAGAGAGCTGGATCAATAATATAAAACCTTTATCCGCCC	312		-	6	6	0	0	0	0	0	0	0	11	9	4	0	0	428	464	161.034	CBU_0425	hypothetical protein (NCBI)
CBU_0426	221464	NP_819464.2	215918965	7195	380905	378965	-	379125	379174	Spotted	ATTTATCTCGGAGGACTCACGTTGATTTCTTATCTCGGTTCAATGGGTGG	313		-	2	2	0	0	0	0	0	0	0	16	8	1	0	0	282.688	249	131.084	CBU_0426	amino acid permease (RefSeq)	531	E	Amino acid transporters	GO:0006865,GO:0016020,GO:0015171
CBU_0426a	5437824	YP_002332963.1	215918964	7195	380654	380740	+					314		-	0	0	0	0	0	0	0	0	0									CBU_0426a	hypothetical protein (RefSeq)
CBU_0426b	5437825			7195	381126	382082	+					315		-	0	0	0	0	0	0	0	0	0									CBU_0426b
CBU_0427					380712	380761		380712	380761	Spotted	GTCTGGTGGAAATCCTCTCGGTACATTAAAATTTCACCCATGAACATCGC	316			1	1	0	0	0	0	0	0	0	16	9	1	0	0	276.875	264.5	115.471
CBU_0429	221466	NP_819466.1	29653774	7195	382066	382461	+	382216	382265	Spotted	GTTGCCATAGCGGGAAATCGAATTAACACTGAAGGCGAGTTAGTTATCAC	317		-	10	10	0	0	0	0	0	0	0	80	49	8	0	0	316.087	272	140.312	CBU_0429	hypothetical protein (NCBI)				GO:0006415,GO:0003747
CBU_0430	221467	NP_819467.1	29653775	7195	382593	384089	+	383930	383979	Spotted	AGAAGCAATGAGTTTCGATGAAGATTATATCACCGCACTAGAATATGGAC	318		-	10	9	0	2	0	0	1	1	1	227	154	40	6	0	355.515	324	162.481	lysS	lysyl-tRNA synthetase (NCBI)	1190	J	Lysyl-tRNA synthetase (class II)	GO:0006430,GO:0005737,GO:0003676,GO:0004824,GO:0005524	6.1.1.6	Lysine--tRNA ligase.
CBU_0431	221468	NP_819468.1	29653776	7195	384834	384058	-	384128	384177	Spotted	ATTCAGGACGTTGCACTTGAAAATGGAGATATCGCGTTTAATCAGTTCCC	319		-	10	10	0	0	0	0	0	0	0	69	35	5	0	0	286.696	271	117.068	CBU_0431	hypothetical protein (NCBI)	354	R	Predicted aminomethyltransferase related to GcvT	GO:0006546,GO:0005737,GO:0004047
CBU_0432	221469	NP_819469.1	29653777	7195	384941	386227	+	386135	386184	Spotted	CACGATTATCAAATGGCCTTAATCGTTTTACCCCTTTTGATTTTGGCCGC	320		-	2	2	0	0	0	0	0	0	0	15	3	2	0	0	271.067	217	157.383	CBU_0432	major facilitator family transporter (NCBI)	2271	G	Sugar phosphate permease	GO:0006810,GO:0016021,GO:0005215
CBU_0433	221470	NP_819470.1	29653778	7195	386294	386815	+	386722	386771	Spotted	CAACCTTCGTTATACGGTTTTACAGGAAGAAAACAAGCGCATCATGATCC	321		-	10	10	0	0	0	0	0	0	0	98	44	5	0	0	267.694	223	116.15	CBU_0433	hypothetical protein (NCBI)				GO:0016020
CBU_0434	221471	NP_819471.1	29653779	7195	387034	386915	-	386915	386957	Spotted	CAACTACTTGATATTCCCTCTTTACCTCGCTCCCTTAAGTTGA	322		-	1	1	0	0	0	0	0	0	0	6	2	0	0	0	250.167	208	84.001	CBU_0434	hypothetical protein (NCBI)
CBU_0434a	5437826	YP_002332964.1	215918966	7195	387351	387133	-					323		-	0	0	0	0	0	0	0	0	0									CBU_0434a	hypothetical protein (RefSeq)
CBU_0435	221472			7195	387987	387394	-	387510	387559	Spotted	TCATCGGTGTGAAAATGGTTATCTCTTTAAAGAGGTTATCAGCGCCCAAC	324		-	2	2	0	0	0	0	0	0	0	6	6	1	0	0	360.833	307	89.3049	CBU_0435	hypothetical protein (RefSeq)
CBU_0436	221473	NP_819473.1	29653781	7195	388751	387975	-	388165	388216	Spotted	GCCAAACAGAATTTCTCAATTACAAAGTTTCTGGAGCTAGCTTATGGCTGAG	325		-	5	5	0	0	0	0	0	0	0	6	6	5	0	0	505	565	125.787	CBU_0436	hypothetical protein (NCBI)
CBU_0437	221474			7195	388985	389573	+	389274	389323	Spotted	TTCTTAGAACAGAAGGGTTAACCTGTGAGAAGGTGAGAACTGTTTTAGAG	326	65	operon	4	4	1	0	0	0	0	0	0	6	5	4	3	1	631.667	717	321.816	CBU_0437	hypothetical protein (RefSeq)
CBU_0438					389519	389568		389519	389568	Spotted	GTTAGATCATCAACTTTTGAGCTCGTTGGGAGAAAGCTTAGGACCGTTAG	327	65	operon	4	4	1	0	0	0	0	0	0	6	5	4	3	1	631.667	717	321.816
CBU_0439	221476	NP_819476.1	29653784	7195	389576	389710	+	389645	389696	Spotted	TCGTCATGGGATATTGTAAATCAAACAACGTGGGATAAATTACATGAAAGAT	328	65	operon	4	4	0	0	0	0	0	0	0	6	5	4	3	0	614.5	717	302.179	CBU_0439	hypothetical protein (NCBI)
CBU_0440	221477	NP_819477.1	29653785	7195	389688	389885	+	389808	389850	Spotted	GATGGCAAAGTGGTGGAGATTCTTGCGAGCGAAATTAAGTATG	329		-	4	4	0	0	0	0	0	0	0	6	5	4	3	0	614.5	717	302.179	CBU_0440	hypothetical protein (NCBI)
CBU_0441	221478	NP_819478.1	29653786	7195	390500	389985	-	390011	390060	Spotted	TAAACAATGGTTATTGCAGCATGAGAGCGCGTCTTTTGAATCTAACCTCG	330	66	operon	10	10	0	0	0	0	0	0	0	168	106	29	4	3	347	304.5	166.448	ogt	methylated-DNA--protein-cysteineS-methyltransferase (NCBI)	350	L	Methylated DNA-protein cysteine methyltransferase	GO:0006281,GO:0003908	2.1.1.63	Methylated-DNA--[protein]-cysteine S-methyltransferase.
CBU_0442	221479	NP_819479.1	29653787	7195	390853	390506	-	390801	390850	Spotted	AATAACATCATCCAGCTACTTGAAACAGAACAAACTCAGGGTAAAGAAAT	330	66	operon	10	10	0	0	5	6	0	5	0	296	199	72	36	10	397.287	324	226.999	rplS	50S ribosomal protein L19 (NCBI)	335	J	Ribosomal protein L19	GO:0006412,GO:0005840,GO:0003735
CBU_0443	221480	NP_819480.1	29653788	7195	391590	390850	-	391037	391086	Spotted	CAAGACTCATTTACTGCCGGACTTTTAGACTATCCTCATTACACTCGCCC	330	66	operon	10	10		1	7	0	0	6	0	331	216	87	19	4	380.245	354	192.058	trmD	tRNA (guanine-N1)-methyltransferase (NCBI)	336	J	tRNA-(guanine-N1)-methyltransferase	GO:0008033,GO:0003723,GO:0009019	2.1.1.31	tRNA (guanine-N(1)-)-methyltransferase.
CBU_0444	221481	NP_819481.1	29653789	7195	392098	391592	-	391632	391682	Spotted	AGAACGCCTAATTCCTTATACTTCATACACCATTCAATCAATCGACTTAGA	330	66	operon	10	10	0	0	7	0	0	5	0	197	116	39	7	4	342.569	297	178.768	rimM	16S rRNA processing protein (NCBI)	806	J	RimM protein, required for 16S rRNA processing	GO:0006364,GO:0005840,GO:0043022
CBU_0445	221482	NP_819482.2	215918967	7195	392722	392177	-	392248	392287	Spotted	CAAGCAGCGAAAGCTCAAAAGAAAGCCGTAGCGACTGAAG	330	66	operon	10	9	0	2	8	7	0	5	0	314	208	79	32	14	391.914	324.5	217.624	rpsP	SSU ribosomal protein S16P (RefSeq)	228	J	Ribosomal protein S16	GO:0006412,GO:0005840,GO:0003735
CBU_0446	221483	NP_819483.1	29653791	7195	393037	393747	+	393675	393726	Spotted	ACATGGCGAACCTTTATTGAATAATGCTTATGAGCTTGTAGCTAAGACTATT	331		-	0	0	0	0	0	0	0	0	0									CBU_0446	hypothetical protein (NCBI)
CBU_0447	221484	NP_819484.1	29653792	7195	394394	393840	-	393993	394044	Spotted	CGAATCAGGAAAGCTTGAAATTGTAAAACTATTAATTGAGGGATACGCTAGA	332		-	10	1	0	9	0	0	0	0	0	32	15	10	0	0	366.844	234.5	232.203	CBU_0447	ankyrin repeat domain protein (NCBI)
CBU_0448	221485	NP_819485.1	29653793	7195	394433	394528	+	394470	394519	Spotted	TTTGCTTATTCGATCGACTGGGTTATGCTAACGCAATGATTTGCAAGGAG	333	67	operon	1	1	0	0	0	0	0	0	0	1	1	1	0	0	668	668	#DIV/0!	CBU_0448	hypothetical protein (NCBI)
CBU_0449	2209991			7195	394529	395522	+					333	67	operon	0	0	0	0	0	0	0	0	0									CBU_0449
CBU_0450	221486	NP_819486.1	29653794	7195	396936	395551	-	395606	395655	Spotted	AAGCGCATGAAAGGCGATAAAATGATGAAAAGATTTAAACAGATGCAAGG	334		-	10	5	0	1	0	6	0	6	1	250	169	64	14	6	384.76	335	196.696	ffh	signal recognition particle protein (NCBI)	541	U	Signal recognition particle GTPase	GO:0006614,GO:0048500,GO:0016020,GO:0005525,GO:0017111,GO:0008312
CBU_0451	221487	NP_819487.2	215918968	7195	396962	397510	+	397064	397113	Spotted	GAGCCGAGTTCGTATGCGCTTGTTCATGTTTTATTGTCTATTGTAACCGC	335	68	operon	10	10		2	0	0	0	0	0	53	35	8	4	1	341.358	295	187.85	CBU_0451	cytochrome C assembly protein (RefSeq)	4137	R	ABC-type uncharacterized transport system, permease component	GO:0008535,GO:0016020
CBU_0452	221488	NP_819488.1	29653796	7195	397507	398760	+	398711	398760	Spotted	AAGTGAGTAGAAATGCGGTTCGCTTAGTAAAGGTTTGGTCTAAATTTTAG	335	68	operon	10	10	0	0	0	0	0	0	0	173	102	26	4	1	323.671	288	152.817	CBU_0452	hypothetical protein (NCBI)	4536	P	Putative Mg2+ and Co2+ transporter CorB
CBU_0453	221489	NP_819489.2	215918969	7195	398762	399322	+	399048	399097	Spotted	TTCGTTATTATGGAAAATACCCTCGTGACGATCATCTTATTTGGCGCAGC	335	68	operon	10	7	0	4	0	0	0	0	0	47	19	7	3	0	310.468	220	199.951	fimT	putative fimT protein (RefSeq)	4970	NU	Tfp pilus assembly protein FimT
CBU_0454	221490	NP_819490.1	29653798	7195	399357	400052	+	399939	399988	Spotted	GCACCAAAATATTTTCGTATTTCTGGTTTGGGAAGCATGGAAGAAGTGCG	336		-	10	4	1	0	2	0	9	4	0	274	183	89	44	8	419.92	360	233.482	adk	adenylate kinase (NCBI)	563	F	Adenylate kinase and related kinases	GO:0006139,GO:0004017,GO:0005524	2.7.4.3,2.7.4.-	Adenylate kinase.,
CBU_0455	221491	NP_819491.1	29653799	7195	400086	400451	+	400377	400426	Spotted	GAGTTAATCGAAAAGGCAAAAGACCTGAATACAGATATCTTAAGGGAAGC	337		-	9	8	1	1	0	2	3	4	1	92	34	6	2	0	259.652	217.5	140.079	CBU_0455	thioredoxin (NCBI)				GO:0045454
CBU_0456	221492	NP_819492.1	29653800	7195	400830	400477	-	400635	400684	Spotted	TAAAGCGAAGAAAGATGCAAGCCGTAAACTTGCTAAACTTCGAAAAGAGG	338		-	2	2	0	0	0	0	0	0	0	7	5	1	0	0	344.714	311	113.335	CBU_0456	DNA-binding protein, putative (NCBI)
CBU_0457	221493	NP_819493.1	29653801	7195	401095	400976	-	400986	401036	Spotted	GCCGAATTTACTATTAAAAATCGCAATTTTCCCACGACTCTATAGATCTCC	339		-	1	4	0	0	0	0	0	0	0	7	7	3	0	0	463.714	448	141.126	CBU_0457	hypothetical protein (NCBI)
CBU_0458	221494	NP_819494.1	29653802	7195	401121	401522	+	401454	401503	Spotted	AATGTTAGGGGTTATATTGGTTTGCCGTTGATAGGGCGTAGTGATGTTTG	340		-	10	10	0	0	0	0	0	0	0	44	25	6	1	0	322.227	263.5	149.581	CBU_0458	hypothetical protein (NCBI)	4731	S	Uncharacterized protein conserved in bacteria
CBU_0459	221495	NP_819495.2	215918970	7195	401501	402721	+	402615	402666	Spotted	CGCTGATTGAAACCATAACGATATTATCCTTTATCGTTTCTTCTTATTGGGT	341	69	operon	8	8	0	0	0	0	0	0	0	81	21	5	1	0	241.679	203	115.238	rosB	transporter, monovalent cation:proton antiporter-2 (CPA2) family (RefSeq)	4651	P	Kef-type K+ transport system, predicted NAD-binding component	GO:0006885,GO:0016021,GO:0015299
CBU_0460	221496	NP_819496.1	29653804	7195	402797	403573	+	403477	403526	Spotted	AGAAGAATTAAAGAGTCTCGATGGATTGATTAGTCGTGCTTTATGGGTAT	341	69	operon	10	7	0	4	0	0	0	0	0	54	18	6	0	0	269.741	199	148.727	CBU_0460	hypothetical protein (NCBI)
CBU_0461	221497	NP_819497.1	29653805	7195	403618	406272	+	406172	406221	Spotted	AAGCGTTAGCGGATCAAAACGAATTTGAAAAGGATCAACTCCTATCAGCC	341	69	operon	10	4	0	2	1	2	10	7	0	119	66	27	17	5	372.571	275	238.882	pdhA	pyruvate dehydrogenase, E1 component (NCBI)	2609	C	Pyruvate dehydrogenase complex, dehydrogenase (E1) component	GO:0006810,GO:0008152,GO:0016020,GO:0004739,GO:0005215,GO:0016491	1.2.4.1	Pyruvate dehydrogenase (acetyl-transferring).
CBU_0462	221498	NP_819498.1	29653806	7195	406338	407648	+	407599	407648	Spotted	TCGTTTATTTAGCCGAACGGTTATCGGATATCAGAACCTTATTACTGTAA	341	69	operon	10	7	0	3	2	5	10	6	0	103	57	21	19	7	380.136	271	264.857	pdhC	pyruvate dehydrogenase, E2 component, dihydrolipoamide acetyltransferase (NCBI)	508	C	Pyruvate/2-oxoglutarate dehydrogenase complex, dihydrolipoamide acyltransferase (E2) component, and related enzymes	GO:0008152,GO:0009351,GO:0004742,GO:0005515,GO:0008415	2.3.1.12	Dihydrolipoyllysine-residue acetyltransferase.
CBU_0463	221499	NP_819499.1	29653807	7195	407661	409085	+	408542	408591	Spotted	ATACATCGCTGTCGATAAACAAATGCGCACTAATGTCTCCCACATTTACG	341	69	operon	10	10	0	3	3	6	10	10	0	238	141	46	24	16	364.824	277	228.163	lpdA	dihydrolipoamide dehydrogenase (NCBI)	1249	C	Pyruvate/2-oxoglutarate dehydrogenase complex, dihydrolipoamide dehydrogenase (E3) component, and related enzymes	GO:0006118,GO:0045454,GO:0005737,GO:0004148,GO:0050660	1.8.1.4	Dihydrolipoyl dehydrogenase.
CBU_0463a	5437827			7195	409726	409340	-					342		-	0	0	0	0	0	0	0	0	0									CBU_0463a
CBU_0465	221500	NP_819500.1	29653808	7195	409709	409804	+	409745	409794	Spotted	CAGGTAAGGAACGAATATCGTAAAATGGAAGCGTTAACGTTGCTTAATCA	343		-	0	0	0	0	0	0	0	0	0									CBU_0465	hypothetical protein (NCBI)
CBU_0466					409841	409883		409841	409883	Spotted	CAACTACTTGGTAGTCCCTCTTTACCTCGCCCTCTTAAGTTGA	344			0	0	0	0	0	0	0	0	0
CBU_0467	221502	NP_819502.1	29653810	7195	410379	411227	+	410956	411005	Spotted	TTCATTATTCTTCGGTACCGCAGTTAATTAAGGATTTAAAACAACTGGGT	345		-	10	8	0	5	1	0	0	6	0	49	29	12	3	1	355.51	286	211.628	CBU_0467	methyltransferase, putative (NCBI)	2226	H	Methylase involved in ubiquinone/menaquinone biosynthesis	GO:0008152,GO:0008168
CBU_0468	221503	NP_819503.1	29653811	7195	411476	411228	-	411352	411401	Spotted	GAGCAAGGCGACTTAACGCTGGAAGAATCCCTACAAAATTTTGAAAGAGG	346		-	10	10	0	1	1	0	0	2	0	56	33	9	3	1	348.018	306.5	194.899	xseB	exodeoxyribonuclease VII small subunit (NCBI)	1722	L	Exonuclease VII small subunit	GO:0006308,GO:0009318,GO:0008855	3.1.11.6	Exodeoxyribonuclease VII.
CBU_0469	221504	NP_819504.1	29653812	7195	411692	411489	-	411641	411690	Spotted	GATTATCATTGAAACCTACACAGACGCCGTTGATGCCTATAACGCAAAGG	347		-	2	2	0	0	0	0	0	0	0	5	3	2	1	0	433.6	252	305.086	CBU_0469	hypothetical protein (NCBI)
CBU_0470	221505	NP_819505.1	29653813	7195	412395	411739	-	411864	411913	Spotted	ACCGGAATCGACAATTCAACAATTAAGCGCCGAAGTTGATAAAATTTATT	348		-	9	9	0	1	0	0	0	0	0	47	17	7	1	0	291.766	218	166.669	CBU_0470	hypothetical protein (NCBI)	1926	R	Predicted phosphoribosyltransferases	GO:0009116
CBU_0471	221506			7195	412731	414213	+	414127	414177	Spotted	AATAGCGAGTTGTATTCAGTATTTTATAAATACGTCGATGAGGTAGCGGGA	349		-	3	3	0	0	0	0	0	0	0	8	6	1	0	0	351	305.5	139.212	CBU_0471	hypothetical protein (RefSeq)
CBU_0472	221507	NP_819507.1	29653815	7195	414286	416091	+	416042	416091	Spotted	AAAATTACGGCAAGCTATTTCTTCACTTAATTAGGGAGCATCAGCAATAA	350		-	10	7	0	0	1	4	0	8	0	166	106	35	1	0	349.988	310	167.895	recQ	ATP-dependent DNA helicase RecQ (NCBI)	514	L	Superfamily II DNA helicase	GO:0006310,GO:0009432,GO:0005622,GO:0003676,GO:0004003,GO:0005524	3.6.1.-
CBU_0473	221508	NP_819508.2	215918971	7195	416156	416545	+	416496	416545	Spotted	ACGTCGTTAAAATTCGTCCACTCAAACGACTTAAAGAAATGGTTGAATAG	351		-	4	4	0	0	0	0	0	0	0	11	5	3	1	0	345.818	213	227.068	CBU_0473	DNA-binding protein BpH2 (RefSeq)	776	L	Bacterial nucleoid DNA-binding protein	GO:0003677
CBU_0474	221509	NP_819509.1	29653817	7195	416557	416805	+	416763	416805	Spotted	TAAAGTGACTCAAAAGAAAATGGGCCGTCGTTCCAAAGCTTGA	352		-	4	4	0	0	0	0	0	0	0	9	5	3	1	0	386.111	367	233.742	CBU_0474	hypothetical protein (NCBI)
CBU_0475					416894	416928		416894	416928	Spotted	CTGCTTCCCTTCGGTCGCCATTGTTGTGGATTTCC	353			3	3	0	0	0	0	0	0	0	5	5	3	0	0	494.6	540	131.515
CBU_0476	221511	NP_819511.1	29653819	7195	417287	419029	+	418973	419024	Spotted	GCGATTTCTCGATGGCTTAATTTGGCGCTTTCAATAATTAAGAATATTCAAG	354		-	1	1	0	0	0	0	0	0	0	5	4	1	0	0	350.2	354	121.555	CBU_0476	hypothetical protein (NCBI)
CBU_0477	221512	NP_819512.1	29653820	7195	419317	419039	-	419119	419168	Spotted	CTCACCATATCAATCCGCCATGTCAATGCTTAACTTCTACATCAACCGTG	355		-	1	1	0	0	0	0	0	0	0	7	3	1	0	0	290.429	186	190.835	CBU_0477	hypothetical protein (NCBI)
CBU_0478	221513	NP_819513.1	29653821	7195	419337	419435	+	419401	419435	Spotted	AAAAGGCACCTCCCGACATGAATGCCGGAATGTAA	356		-	2	2	0	0	0	0	0	0	0	2	2	1	0	0	557	557	162.635	CBU_0478	hypothetical protein (NCBI)
CBU_0478a	5437828	YP_002332965.1	215918972	7195	419555	419725	+					357	70	operon	0	0	0	0	0	0	0	0	0									CBU_0478a	conserved cytosolic protein (RefSeq)	2835	S	Uncharacterized conserved protein
CBU_0479	221514	NP_819514.2	215918973	7195	419715	420476	+	420136	420185	Spotted	TATTTAATCCGCACAGTACTAAAGTCGTTTTAAACCGGCGCAATTACGCG	357	70	operon	10	10	0	5	0	1	2	8	0	146	88	29	7	6	357.137	295	198.32	kdsB	3-deoxy-manno-octulosonate cytidylyltransferase (RefSeq)	1212	M	CMP-2-keto-3-deoxyoctulosonic acid synthetase	GO:0009103,GO:0005737,GO:0008690	2.7.7.38	3-deoxy-manno-octulosonate cytidylyltransferase.
CBU_0480	221515	NP_819515.1	29653823	7195	420939	420460	-	420475	420524	Spotted	AACAAATAGATCAAGCGCTCATTGAAGTAAAAGCTTCTTTGGAGAGCATT	358		-	10	10	0	0	0	0	0	4	0	74	46	14	3	0	350.108	276.5	178.672	argR	arginine repressor (NCBI)	1438	K	Arginine repressor	GO:0006355,GO:0003700
CBU_0481	221516	NP_819516.1	29653824	7195	421033	421785	+	421559	421608	Spotted	TAGACCCTAAAATGATAACAGCCATGCGTGATTTAATTCATGAATTAGCG	359	71	operon	8	8	2	3	0	0	3	3	0	85	21	6	4	3	260.329	223	176.747	CBU_0481	amino acid ABC transporter, ATP-binding protein (NCBI)	1126	E	ABC-type polar amino acid transport system, ATPase component	GO:0005524,GO:0015600,GO:0015597,GO:0015601,GO:0015598,GO:0015599	3.6.3.21	Polar-amino-acid-transporting ATPase.
CBU_0482	221517	NP_819517.1	29653825	7195	421789	422598	+	422497	422548	Spotted	GGCAATCAAGCGCTGTTGTTAAAATTAAATAAAGCATTAGCAGCAATTAAAG	359	71	operon	10	10	2	3	0	0	3	3	0	144	54	8	5	3	276.917	235	156.449	CBU_0482	amino acid ABC transporter, periplasmic amino acid-binding protein (NCBI)	834	ET	ABC-type amino acid transport/signal transduction systems, periplasmic component/domain	GO:0006810,GO:0030288,GO:0016020,GO:0004970,GO:0005234
CBU_0483	221518	NP_819518.1	29653826	7195	422598	423263	+	423093	423142	Spotted	GTGGCATTAATTGGATTAGGAGATTTAATGAATAAGGCGCAATTGGCCGC	359	71	operon	7	7	1	3	0	0	3	3	1	86	25	5	4	3	258.174	190.5	179.468	CBU_0483	amino acid ABC transporter, permease protein (NCBI)	4215	E	ABC-type arginine transport system, permease component	GO:0006810,GO:0009276,GO:0016021,GO:0005215
CBU_0484	221519	NP_819519.1	29653827	7195	423260	423931	+	423745	423794	Spotted	AGGAACTTCATTAGCAGGTACAATCACATTAATGGATATTATGGGAGTCA	359	71	operon	10	10	2	4	0	0	3	4	1	107	34	7	5	3	268.336	211	168.232	CBU_0484	amino acid ABC transporter, permease protein (NCBI)	4160	E	ABC-type arginine/histidine transport system, permease component	GO:0006810,GO:0009276,GO:0016021,GO:0005215
CBU_0485	221520	NP_819520.1	29653828	7195	423944	425560	+	425260	425309	Spotted	TAAAGATGTTGTACACCGTTGTGCTAAGGGCGACCTAAAACGAGACTTTA	360		-	5	5	0	0	0	0	0	0	0	5	5	5	4	0	780.2	822	90.6984	CBU_0485	hypothetical protein (NCBI)
CBU_0486	221521	NP_819521.1	29653829	7195	427782	425620	-	425620	425669	Spotted	AACCTCATCCTAATGGTAAAGTGAGCGACGATAATAGAGGCAATCGGTAA	361		-	10	7	0	0	0	7	0	7	0	190	116	34	9	1	346.621	310	174.825	CBU_0486	ribonuclease, Rne/Rng family (NCBI)	1530	J	Ribonucleases G and E	GO:0006396,GO:0005737,GO:0003723,GO:0004540	3.1.4.-
CBU_0487	2209993	YP_338279.1	77358713	7195	428111	429037	+	428988	429037	Spotted	TTTTAGATTCCGAGTTAATGAAATGTCTCACCCAACTTAACGCCACCTAA	362		-	10	8	0	4	0	1	0	0	0	188	89	21	2	0	292.957	245	146.202	rluC	ribosomal large subunit pseudouridine synthase C (NCBI)	564	J	Pseudouridylate synthases, 23S RNA-specific	GO:0001522,GO:0003723,GO:0016439	5.4.99.12	tRNA-pseudouridine synthase I.
CBU_0488	221522	NP_819522.1	29653830	7195	429066	429773	+	429684	429733	Spotted	AATAATCGGATCGCTTTAGATACCGGCGCTTTTCATACGGGAAATTTGTC	363		-	10	9	0	1	0	0	0	0	0	60	39	16	1	0	357.9	278.5	185.519	CBU_0488	serine/threonine protein phosphatase (NCBI)				GO:0017023,GO:0005963,GO:0000158,GO:0008420,GO:0017018,GO:0004723,GO:0008597,GO:0017020,GO:0004724,GO:0015071,GO:0016787,GO:0030357	3.1.3.16	Phosphoprotein phosphatase.
CBU_0489	221523	NP_819523.1	29653831	7195	430899	429865	-	429897	429948	Spotted	AGTGGTTATGGCCAAAGCTTGATTGAATACAATCATTATACAAATAGCGTTG	364		-	10	8	0	0	1	0	2	1	0	66	24	6	2	0	292.939	220	174.628	CBU_0489	phospholipase A, putative (NCBI)	2829	M	Outer membrane phospholipase A	GO:0006629,GO:0016020,GO:0017063	3.1.1.32	Phospholipase A(1).
CBU_0490	221524	NP_819524.2	215918974	7195	432739	430955	-	431033	431082	Spotted	ATTCCATTAACCAATTGGCCAATATAAAGTTTGGAATTGATACGGCCCGC	365		-	10	10	0	2	0	0	0	0	0	57	32	10	1	0	323.596	279	159.874	CBU_0490	DNA polymerase X family/PHP domain-containing protein (RefSeq)	1796	L	DNA polymerase IV (family X)	GO:0006260,GO:0006281,GO:0005622,GO:0003890,GO:0043565	2.7.7.7	DNA-directed DNA polymerase.
CBU_0491	221525	NP_819525.1	29653833	7195	432883	433077	+	433000	433042	Spotted	CATCACATCAGTCCGGAAGGCTATTATAAAGGTCGCCAAATTT	366	72	operon	10	4	0	0	9	7	0	3	0	116	81	40	22	6	449.595	385	258.327	rpmF	ribosomal protein L32 (NCBI)	333	J	Ribosomal protein L32	GO:0006412,GO:0015934,GO:0003735
CBU_0492	221526	NP_819526.1	29653834	7195	433085	434116	+	433901	433950	Spotted	ATTTTAAAGCGCCTCATCAGACGTGTTGATCCTGAACGTTATAATGGAGC	366	72	operon	10	10	0	1	4	0	1	7	0	216	128	41	8	5	351.38	289.5	189.268	plsX	fatty acid/phospholipid synthesis protein (NCBI)	416	I	Fatty acid/phospholipid biosynthesis enzyme	GO:0006633,GO:0003824
CBU_0493	221527	NP_819527.1	29653835	7195	434113	435072	+	434901	434950	Spotted	AAGAGAACGGGTTATTTTGACAATTGAGCAACATGGTAACACTTCCGCTG	366	72	operon	10	10	0	1	5	0	7	10	0	205	125	31	17	15	349.785	283	214.978	fabH	3-oxoacyl-(acyl carrier protein) synthase (NCBI)	332	I	3-oxoacyl-[acyl-carrier-protein] synthase III	GO:0006633,GO:0004315	2.3.1.180,2.3.1.41	Beta-ketoacyl-acyl-carrier-protein synthase III.,Beta-ketoacyl-acyl-carrier-protein synthase I.
CBU_0494	221528	NP_819528.1	29653836	7195	435173	436114	+	436001	436050	Spotted	GGTCCCGATAATAAATTAGCCGGTTTAATTAAGCGCATTGATCGCCAGAG	366	72	operon	10	10	2	2	6	0	8	5	0	293	187	67	18	13	381.348	340	202.194	fabD	malonyl CoA-acyl carrier protein transacylase (NCBI)	331	I	(acyl-carrier-protein) S-malonyltransferase	GO:0006633,GO:0004314	2.3.1.39	[Acyl-carrier-protein] S-malonyltransferase.
CBU_0495	221529	NP_819529.1	29653837	7195	436190	436939	+	436591	436640	Spotted	CTCGGGACGAATTATTAATATAAGTTCAGTAGTGGCGACAATGGGCAATG	366	72	operon	10	10	0	0	0	0	8	6	0	150	66	23	13	10	320.927	237	221.57	fabG	3-oxoacyl-(acyl-carrier-protein) reductase (NCBI)	1028	IQR	Dehydrogenases with different specificities (related to short-chain alcohol dehydrogenases)	GO:0006633,GO:0004316,GO:0051287	1.1.1.100	3-oxoacyl-[acyl-carrier-protein] reductase.
CBU_0496	221530	NP_819530.1	29653838	7195	437007	437261	+	437135	437184	Spotted	GGTGATGGCATTTGAAGAGGAATTCGAAACTGAAATCCCCGATGAAGATG	366	72	operon	10	5	0	0	3	7	5	10	0	235	149	62	24	15	402.162	332	224.869	acpP	acyl carrier protein (NCBI)	236	IQ	Acyl carrier protein	GO:0006633,GO:0000036,GO:0031177,GO:0048037
CBU_0497	221531	NP_819531.1	29653839	7195	437306	438550	+	438411	438460	Spotted	TTGAAAATCCCGATGAAGGCTGTGATTTAGATTTTGTACCCAATGAGGCG	366	72	operon	10	10	1	2	0	1	8	5	0	194	125	35	22	18	371.289	296	231.85	fabF	3-oxoacyl-acyl carrier protein synthase II (NCBI)	304	IQ	3-oxoacyl-(acyl-carrier-protein) synthase	GO:0009058,GO:0003824,GO:0004315	2.3.1.179,2.3.1.41	Beta-ketoacyl-acyl-carrier-protein synthase II.,Beta-ketoacyl-acyl-carrier-protein synthase I.
CBU_0498	221532	NP_819532.1	29653840	7195	438560	439672	+	439367	439416	Spotted	GTTTCTAATTCACCCTATAATACCTACCAGCATTACGGTTTACCTCCCAC	366	72	operon	10	10	0	0	0	0	0	3	0	197	119	42	9	4	364.391	313	191.383	CBU_0498	conserved hypothetical protein TIGR00247 (NCBI)	1559	R	Predicted periplasmic solute-binding protein
CBU_0499	221533	NP_819533.2	215918975	7195	439768	440253	+	440016	440065	Spotted	TTTATGTCGTGTTAAAAGTCGGGGTGCTAAAGATCGTATCGAAGCTGAGG	366	72	operon	10	5	0	0	1	0	6	8	0	228	152	72	21	9	402.803	348	222.296	tmk	thymidylate kinase (RefSeq)	125	F	Thymidylate kinase	GO:0006233,GO:0006235,GO:0004798,GO:0005524	2.7.4.9	dTMP kinase.
CBU_0500	221534	NP_819534.1	29653842	7195	440250	441209	+	441071	441122	Spotted	GCAAGAACTGAGTACTGCATTGCCGCAAAATAAAATAATGCTATTATTACAA	366	72	operon	10	7	0	1	0	5	6	8	0	141	75	24	16	9	348.355	255	232.348	holB	DNA polymerase III subunit delta (NCBI)	470	L	ATPase involved in DNA replication	GO:0006260,GO:0005634,GO:0003677,GO:0003893,GO:0016448,GO:0016452,GO:0003889,GO:0003894,GO:0008408,GO:0016449,GO:0019984,GO:0003890,GO:0003895,GO:0015999,GO:0016450,GO:0003891,GO:0016000,GO:0016451	2.7.7.7	DNA-directed DNA polymerase.
CBU_0501	221535	NP_819535.1	29653843	7195	441228	441353	+	441230	441279	Spotted	GGCAGTAATTCTGATTTTAGCTTTGAGACTTTTAAAAGCACGTCGTCCCG	367		-	7	7	0	0	0	0	0	0	0	13	11	6	4	0	503.846	486	234.364	CBU_0501	hypothetical protein (NCBI)
CBU_0502	221536	NP_819536.2	215918976	7195	441373	442140	+	441958	442007	Spotted	CCTTTGGAGAAAATGCTAATTGAAACAGATGCTCCTTATTTAGCCCCTGT	368		-	10	10	0	0	0	0	0	3	0	258	172	58	6	2	368.705	335	174.839	CBU_0502	hydrolase, TatD family (RefSeq)	84	L	Mg-dependent DNase		3.1.21.-
CBU_0503	221537	NP_819537.1	29653845	7195	443404	442325	-	442357	442406	Spotted	TTACCAAGTCGCGGCTATTTTGTTAGAAACGATTTGTGGGATTCAATTGC	369		-	10	0	0	0	0	0	10	3	0	47	32	20	17	5	505.766	363	319.791	glnA	glutamine synthetase (NCBI)	174	E	Glutamine synthetase	GO:0006542,GO:0004356	6.3.1.2	Glutamate--ammonia ligase.
CBU_0504	221538	NP_819538.1	29653846	7195	445045	443567	-	443614	443665	Spotted	TATGGACACGCCTTTATGAATAATGCGATTCTTTCATTTGTGATTGGTTTAA	370		-	4	4	1	1	0	0	1	1	0	34	12	4	1	0	275.941	230	158.271	CBU_0504	proton/peptide symporter family protein (NCBI)	3104	E	Dipeptide/tripeptide permease	GO:0006857,GO:0016021,GO:0005215
CBU_0505	221539	NP_819539.1	29653847	7195	445782	445165	-	445196	445245	Spotted	ATTACTCCGGAAATGAGCTCTAATCAGAAGCTAGAAAAGACCTGGGCAAG	371		-	6	6	0	0	0	0	0	0	0	44	16	4	0	0	268.659	230	129.532	CBU_0505	acetyltransferase, GNAT family (NCBI)	1670	J	Acetyltransferases, including N-acetylases of ribosomal proteins	GO:0008152,GO:0009323,GO:0008080,GO:0008999	2.3.1.128	Ribosomal-protein-alanine N-acetyltransferase.
CBU_0505a	5437829	YP_002332966.1	215918977	7195	446054	446164	+					372		-	0	0	0	0	0	0	0	0	0									CBU_0505a	hypothetical protein (RefSeq)
CBU_0506	221540	NP_819540.1	29653848	7195	446222	447946	+	447846	447895	Spotted	TTCATTGTGAATACGCGCATCTTGCTTATCGGTTGGATGTTAACGAGTTC	373		-	10	10	0	3	0	1	0	6	0	255	167	64	5	0	375.012	346	179.325	recJ	single-stranded-DNA-specific exonuclease RecJ (NCBI)	608	L	Single-stranded DNA-specific exonuclease	GO:0006281,GO:0006310,GO:0003676,GO:0030145,GO:0008409	3.1.-.-
CBU_0507	221541	NP_819541.1	29653849	7195	449058	448018	-	448114	448163	Spotted	TATTGTTGCAATTACTTCAGCGTAAGTTTCCCGATTTATCGACAACTTAT	374		-	1	1	0	0	0	0	0	0	0	13	5	0	0	0	250.923	186	109.199	CBU_0507	hypothetical protein (NCBI)
CBU_0508	221542	NP_819542.1	29653850	7195	449980	449267	-	449582	449631	Spotted	TAATAGCGATAGCATCGGGCCTAACAACTGGATTCTGCAATCTTTATTGG	375		-	3	3	0	0	0	0	0	0	0	3	3	2	0	0	594.667	632	95.6312	CBU_0508	hypothetical protein (NCBI)
CBU_0509	221543	NP_819543.1	29653851	7195	450030	450374	+	450264	450313	Spotted	GAAATTGCTCATGATCTTAACATTAGCATTGCAAAGATTACCCGCGGATC	376		-	10	9	0	4	0	0	0	2	0	48	22	8	3	1	329.208	236.5	199.831	trpR	Trp operon repressor (NCBI)	2973	K	Trp operon repressor	GO:0006355,GO:0005622,GO:0003700,GO:0043565,GO:0016564
CBU_0510	221544	NP_819544.1	29653852	7195	450387	450689	+	450580	450629	Spotted	ATCGACTGCTGAATGATTTATTTAAAGACCTAGAAGCTTTTCGCAACCCT	377		-	2	2	0	0	0	0	0	0	0	3	3	2	1	0	609.667	632	224.335	CBU_0510	hypothetical protein (NCBI)
CBU_0510a	5437830	YP_002332967.1	215918978	7195	450860	450979	+					378		-	0	0	0	0	0	0	0	0	0									CBU_0510a	hypothetical cytosolic protein (RefSeq)
CBU_0511	2209994			7195	452366	451088	-					379		-	0	0	0	0	0	0	0	0	0									CBU_0511
CBU_0512	2209995			7195	453430	452394	-					380		-	0	0	0	0	0	0	0	0	0									CBU_0512
CBU_0513	221545	NP_819545.1	29653853	7195	453557	454705	+	454426	454475	Spotted	TATTAATACGCCTGTTACTGGACCGTATTGTCATCCCCTAATTTCGGCAC	381	73	operon	7	7	0	0	0	0	0	0	0	31	14	4	1	0	314.968	230	180.965	CBU_0513	hypothetical protein (NCBI)	1980	G	Archaeal fructose 1,6-bisphosphatase
CBU_0514	221546	NP_819546.1	29653854	7195	454705	455496	+	455361	455410	Spotted	AATCTATCGCCAACTTCATGAAACGATCAGCGGACATACTTTAAAGCACC	381	73	operon	4	3	0	1	0	0	0	0	0	21	11	4	1	0	305.524	280	189.354	CBU_0514	hypothetical protein (NCBI)
CBU_0514a	5437831	YP_002332968.1	215918979	7195	455750	455860	+					382		-	0	0	0	0	0	0	0	0	0									CBU_0514a	hypothetical protein (RefSeq)
CBU_0515	221547	NP_819547.2	215918980	7195	456167	457486	+	457277	457326	Spotted	TCTTTTACGGAACCTTTGATCGGAAAATTTCTTGATTTATCCTGGCAAGG	383		-	1	1	0	0	0	0	0	0	0	15	3	1	0	0	219.267	188	113.293	CBU_0515	transporter, MFS superfamily (RefSeq)	2223	P	Nitrate/nitrite transporter	GO:0006810,GO:0016021,GO:0005215
CBU_0516	221548	NP_819548.1	29653856	7195	457584	457700	+	457597	457639	Spotted	GCGAAGTCGTACAATGGCTTTACAGACATCGATTGATTAAAGA	384		-	1	1	0	0	0	0	0	0	0	1	1	1	0	0	600	600	#DIV/0!	CBU_0516	hypothetical protein (NCBI)
CBU_0516a	5437832	YP_002332969.1	215918981	7195	458236	457880	-					385		-	0	0	0	0	0	0	0	0	0									CBU_0516a	hypothetical protein (RefSeq)
CBU_0517	221549	NP_819549.2	215918982	7195	459990	458719	-	458826	458875	Spotted	CATCAAACTCGGAACGTACTTATTGGATAAAACGAAAGTTGCCGTCGTCC	386		-	10	9	0	0	0	0	10	1	0	255	164	58	30	10	391.357	327	223.985	aspB	aspartate aminotransferase (RefSeq)	436	E	Aspartate/tyrosine/aromatic aminotransferase	GO:0009058,GO:0004069,GO:0016847,GO:0030170	2.6.1.1,2.6.1.17	Aspartate transaminase.,Succinyldiaminopimelate transaminase.
CBU_0518	221550	NP_819550.1	29653858	7195	459984	462002	+	461891	461940	Spotted	ATTGGAAGAGCAAATGTATCATCACGCACGAAACTTGGAATTTGAAGAGG	387		-	10	9	0	2	1	3	0	8	0	219	138	56	8	3	375.046	308	192.769	uvrB	excinuclease ABC subunit B (NCBI)	556	L	Helicase subunit of the DNA excision repair complex	GO:0006289,GO:0009380,GO:0005737,GO:0003677,GO:0004386,GO:0005524,GO:0009381
CBU_0519	221551	NP_819551.1	29653859	7195	462062	462670	+	462576	462625	Spotted	TTTTGTTGATCGTGTTGTTCATTATTCTATTGTCTCTACTGCCTGGAATT	388		-	10	10	0	0	1	0	0	0	0	152	94	22	0	0	333.467	285.5	150.55	CBU_0519	DedA family protein (NCBI)	586	S	Uncharacterized membrane-associated protein
CBU_0520	221552	NP_819552.2	215918983	7195	463599	462700	-	462743	462792	Spotted	TTAAAACGGTTAACGAGAGCAGGTCGATTGATTTGCGATTATTTAGGGCG	389	74	operon	10	8	0	2	0	0	7	6	0	78	51	23	16	4	418.962	325	246.872	leuA	hydroxymethylglutaryl-CoA lyase (RefSeq)	119	E	Isopropylmalate/homocitrate/citramalate synthases	GO:0008152,GO:0003824,GO:0004419	4.1.3.4	Hydroxymethylglutaryl-CoA lyase.
CBU_0521	221553	NP_819553.2	215918984	7195	465040	463586	-	464121	464172	Spotted	CGCAGTTAACTTCGGAAGAAATTAAATTAGTTGCGGATACTCAAACGAATAT	389	74	operon	10	10	0	0	0	0	0	1	0	111	68	22	5	0	346.252	294	171.462	CBU_0521	amidohydrolase family protein (RefSeq)	402	FR	Cytosine deaminase and related metal-dependent hydrolases	GO:0016810
CBU_0522	221554	NP_819554.1	29653862	7195	465216	465386	+	465322	465361	Spotted	TGGTGGTAACACAGGGCGATTTCACCAAAGTTCAAATTAG	390		-	2	2	0	0	0	0	0	0	0	2	2	2	0	0	501	501	0	CBU_0522	hypothetical protein (NCBI)
CBU_0522a	5437833	YP_002332970.1	215918985	7195	465582	465854	+					391		-	0	0	0	0	0	0	0	0	0									CBU_0522a	hypothetical protein (RefSeq)
CBU_0523	221555	NP_819555.2	215918986	7195	466945	465851	-					392		-	1	1	0	0	0	0	0	0	0	10	5	0	0	0	287.5	243	104.321	CBU_0523	IS1111A transposase (RefSeq)	3547	L	Transposase and inactivated derivatives	GO:0006313,GO:0003677,GO:0004803
CBU_0524	221556	NP_819556.2	215918987	7195	467155	469707	+	469632	469681	Spotted	TCAACTTTCACAAGATGAGTTATTAGTGGGTATGGAAGCGATTTCGGCAG	393	75	operon	10	9	2	3	0	2	1	6	0	213	128	39	8	2	345.577	289	178.797	gyrA	DNA gyrase subunit A (RefSeq)	188	L	Type IIA topoisomerase (DNA gyrase/topo II, topoisomerase IV), A subunit	GO:0006268,GO:0006265,GO:0005694,GO:0003918,GO:0005524	5.99.1.3	DNA topoisomerase (ATP-hydrolyzing).
CBU_0525	221557	NP_819557.1	29653865	7195	469768	470850	+	470708	470757	Spotted	AAGCAACGGAAAACGGATTGGCTAATTTAAAAGGTCATCGTCTTTTAGGC	393	75	operon	10	7	0	1	3	0	4	8	0	131	85	29	10	6	369.618	282	213.306	serC	phosphoserine aminotransferase (NCBI)	1932	HE	Phosphoserine aminotransferase	GO:0006564,GO:0004648,GO:0030170	2.6.1.52	Phosphoserine transaminase.
CBU_0526	221558	NP_819558.1	29653866	7195	470856	472172	+	471777	471826	Spotted	GATCAAGTGCCATTAACCATCGATGAATTTCCTGTTTTGCTTATTGCCGC	393	75	operon	10	10	5	4	3	0	2	7	0	234	133	45	15	8	346.855	277	202.716	aroA	3-phosphoshikimate 1-carboxyvinyltransferase (NCBI)	128	E	5-enolpyruvylshikimate-3-phosphate synthase	GO:0003866	2.5.1.19	3-phosphoshikimate 1-carboxyvinyltransferase.
CBU_0527	221559	NP_819559.1	29653867	7195	472173	472886	+	472799	472848	Spotted	AACTCATTTAAGTATCGAAGCAGTTTTCGCGACGGTCATGAATCATGTCC	393	75	operon	10	10	4	0	1	0	5	0	0	270	176	67	21	12	376.115	301	210.631	cmk	cytidylate kinase (NCBI)	283	F	Cytidylate kinase	GO:0006139,GO:0004127,GO:0005524	2.7.4.14	Cytidylate kinase.
CBU_0528	221560	NP_819560.2	215918988	7195	473018	474685	+	474542	474591	Spotted	GATCGTAAGAATCGACTTATCAATGTCTCGCATAAAGCTGTAGAAGGTCG	394		-	10	9	1	1	3	5	0	6	1	270	198	80	16	4	404.904	364	193.951	rpsA	SSU ribosomal protein S1P (RefSeq)	539	J	Ribosomal protein S1	GO:0006412,GO:0005840,GO:0003723,GO:0003735
CBU_0529	221561	NP_819561.1	29653869	7195	474840	475130	+	475061	475110	Spotted	ATCCAAAGTAAAGCAAATCGAAGCCGAAGTGCAAAATTTACGAACGATCC	395	76	operon	4	4	0	0	0	0	0	0	0	13	9	4	2	0	412.769	356	238.476	CBU_0529	hypothetical protein (NCBI)
CBU_0530	221562	NP_819562.2	215918989	7195	475127	476296	+	475970	476019	Spotted	AGAATTTCATTGGTATTGGCCATTTCGGATCATTTACAACATCGACACGG	395	76	operon	10	10	0	0	0	0	0	0	0	99	49	16	3	1	317.212	249	173.523	CBU_0530	tetratricopeptide repeat ptrotein (RefSeq)	2956	G	Predicted N-acetylglucosaminyl transferase	GO:0005488
CBU_0531	221563	NP_819563.1	29653871	7195	476300	477010	+	476959	477010	Spotted	AGATCCTTTAAAGGCATTAGAGGCTATTGATAAAGATATTAAGACCCGTTGA	395	76	operon	10	7	0	1	0	0	6	3	0	187	123	54	16	5	402.112	335	219.36	pyrF	orotidine 5'-phosphate decarboxylase (NCBI)	284	F	Orotidine-5'-phosphate decarboxylase	GO:0006207,GO:0004590	4.1.1.23	Orotidine-5'-phosphate decarboxylase.
CBU_0532	221564	NP_819564.2	215918990	7195	477073	477444	+	477395	477444	Spotted	TTGCTCGTCTCATAAGAAACAATCCTCATCGCTTAGTGGTTAATCCGTAG	396		-	9	9	0	0	0	0	0	0	0	25	14	3	0	0	322.8	277	154.212	CBU_0532	competence protein ComEA, helix-hairpin-helix repeat region (RefSeq)				GO:0005622,GO:0003677,GO:0043565
CBU_0533	221565	NP_819565.1	29653873	7195	477656	478723	+	478663	478712	Spotted	GTTGACGCGCAAACCGATCATAGACAACGAAATCGATATTATCGCTAACC	397		-	10	10	0	0	0	0	0	5	0	118	74	21	3	1	338.559	287	170.74	rfe	undecaprenyl-phosphatealpha-N-acetylglucosaminyltransferase (NCBI)	472	M	UDP-N-acetylmuramyl pentapeptide phosphotransferase/UDP-N-acetylglucosamine-1-phosphate transferase	GO:0016021,GO:0008963	2.7.8.-,2.4.1.-	,
CBU_0534	221566	NP_819566.1	29653874	7195	480042	478846	-	478896	478945	Spotted	CTTAAAGCAAGAGCCGCTTCGTAGATTACTTGAAATTTTGTGTACCGGCG	398		-	1	1	0	0	0	0	0	0	0	1	1	1	0	0	617	617	#DIV/0!	CBU_0534	hypothetical protein (NCBI)
CBU_0535	221567	NP_819567.1	29653875	7195	480220	481191	+	480947	480996	Spotted	CTAGTGTTGATTTAAAGGCCATTAAGGATTTTGTGAAACGCCATCACCTG	399		-	1	1	0	0	0	0	0	0	0	24	2	1	0	0	197.292	170.5	94.6143	CBU_0535	lipoprotein, putative (NCBI)				GO:0005488
CBU_0536	221568	NP_819568.1	29653876	7195	481347	481225	-	481235	481264	Spotted	TGAGGAGGCCAAAATTGAAGTGGCTGTGCG	400		-	2	2	0	0	0	0	0	0	0	10	3	1	0	0	262.1	196	164.968	CBU_0536	hypothetical protein (NCBI)
CBU_0537	221569	NP_819569.1	29653877	7195	481372	481545	+	481388	481437	Spotted	TGTTCCTTTCAAAATTCCTTGATACAACGGATTCCTATTATTACCCAGCC	401		-	2	2	0	0	0	0	0	0	0	10	3	2	0	0	284.9	213.5	175.777	CBU_0537	hypothetical protein (NCBI)
CBU_0538	221570	NP_819570.1	29653878	7195	481714	481806	+	481732	481761	Spotted	GGCGGGAATCTAGCGCGCTTTCTATCAAGG	402		-	3	3	0	0	0	0	0	0	0	10	6	2	0	0	304.7	276	139.637	CBU_0538	hypothetical protein (NCBI)
CBU_0539	221571	NP_819571.2	215918991	7195	481875	483482	+	483314	483363	Spotted	TTATGACCATTTATTCATGAAAATCGGTCTGATTACCGTAGCGATATCGC	403		-	4	4	1	1	0	0	0	0	0	32	13	4	1	0	278.25	218.5	159.52	CBU_0539	tripeptide permease TppB (RefSeq)	3104	E	Dipeptide/tripeptide permease	GO:0006857,GO:0016021,GO:0005215
CBU_0540	221572	NP_819572.1	29653880	7195	483661	487170	+	487121	487170	Spotted	GAATTGTCTCAGTCAATATGCAAGAAGCTATCGGGTTGGTGGAAGCATAA	404	77	operon	10	8	1	2	0	0	0	0	1	159	94	36	4	0	347.484	279	173.645	CBU_0540	SMC family protein (NCBI)	1196	D	Chromosome segregation ATPases	GO:0051277,GO:0006259,GO:0005694,GO:0005515,GO:0005524
CBU_0541	221573	NP_819573.2	215918992	7195	487225	487917	+	487702	487751	Spotted	GGCTTAGTATTATTTATGGTGTTAAAACATACGCCGGACCCATTGATGGC	404	77	operon	10	6	0	3	0	2	0	5	0	101	54	11	3	1	305.505	256	156.598	zipA	cell division protein ZipA (RefSeq)				GO:0000917,GO:0007049,GO:0016021,GO:0009276,GO:0005515
CBU_0542	221574	NP_819574.2	215918993	7195	487918	489939	+	489888	489939	Spotted	GGGAATTTCGCTTATTGATGAAGAAGCCTTCTTGAAATTACTGAAATCGTAA	404	77	operon	10	10	0	0	0	0	0	3	0	234	183	73	10	0	415.111	389	177.928	ligA	NAD-dependent DNA ligase (RefSeq)	272	L	NAD-dependent DNA ligase (contains BRCT domain type II)	GO:0006281,GO:0006260,GO:0005622,GO:0003677,GO:0003911,GO:0043565	6.5.1.2	DNA ligase (NAD(+)).
CBU_0543	221575	NP_819575.1	29653883	7195	490170	493025	+	492976	493025	Spotted	GCCGACCCCTATTAGAGGAAGTAGAGAAGAAGGATTATACGCCAGTCTAA	405		-	7	3	0	4	0	0	0	0	0	43	15	1	0	0	255.977	199	125.236	CBU_0543	hypothetical protein (NCBI)
CBU_0544	221576	NP_819576.1	29653884	7195	493270	493551	+	493502	493551	Spotted	CGGGTTCTCTGAGTAATAACCAGTGCTTATTTGAAGTGCCCTCTAAATAA	406		-	3	3	0	0	0	0	0	0	0	10	5	2	0	0	306.9	263.5	156.69	CBU_0544	hypothetical protein (NCBI)
CBU_0545	221577	NP_819577.2	215918994	7195	493610	494257	+	494158	494209	Spotted	GGTCAGTGCATTTCCCAGTAAGTTGAATTTTGATTTCCCTTATTGGCAATTG	407	78	operon	10	10	0	1	0	0	0	1	0	138	79	13	1	1	308.688	276.5	136.224	lemA	LemA family protein (RefSeq)	1704	S	Uncharacterized conserved protein
CBU_0546	221578	NP_819578.1	29653886	7195	494267	495313	+	495264	495313	Spotted	CATTAGTAAAACGTTTGGCGGCGATAGGCTATAAACTTAAAGAACAGTAA	407	78	operon	10	10	0	1	0	0	0	1	0	146	73	15	1	1	289.863	250	146.685	htpX	heat shock protein HtpX (NCBI)	501	O	Zn-dependent protease with chaperone function	GO:0006508,GO:0016020,GO:0004222	3.4.24.-
CBU_0547	221579	NP_819579.1	29653887	7195	497039	495354	-	495493	495544	Spotted	CGCTCACAGTCGAGAAAACACATCAATTTCCTTATGAATTATTACAAACGAT	408		-	4	4	0	0	0	0	0	0	0	45	16	3	1	0	257.422	203	147.147	CBU_0547	TPR domain protein (NCBI)	4976	R	Predicted methyltransferase (contains TPR repeat)	GO:0005488
CBU_0548	221580	NP_819580.1	29653888	7195	498024	497020	-	497050	497099	Spotted	ATCCGCGTATAATTTATGCAATGACCGTTTATCAATTGAGTCAAGCCCTT	409	79	operon	10	9	0	2	0	0	0	0	0	76	33	7	1	0	289.105	232	141.343	CBU_0548	lytic murein transglycosylase (NCBI)	2951	M	Membrane-bound lytic murein transglycosylase B		2.4.-.-,3.2.1.-	,
CBU_0549	221581	NP_819581.2	215918995	7195	499252	498104	-	498104	498153	Spotted	TTGGTATGATTATGTCCATCCACACACATCGAAAATTATGGACCAGTTGA	409	79	operon	10	10	1	7	0	1	0	9	0	170	86	30	13	3	335.941	260	206.292	rodA	rod shape-determining protein (RefSeq)	772	D	Bacterial cell division membrane protein	GO:0007049,GO:0008360,GO:0009276,GO:0016021,GO:0031177
CBU_0550	221582	NP_819582.2	215918996	7195	501142	499295	-	499310	499360	Spotted	AGCGCAATGGCTGATAAAATGGCAGGAGAAATCATTAATTATTACTTCAAA	409	79	operon	10	10	2	5	0	1	0	6	0	197	119	47	7	4	362.401	319	187.603	pbpA	penicillin-binding protein (RefSeq)	768	M	Cell division protein FtsI/penicillin-binding protein 2	GO:0009273,GO:0008658
CBU_0551	2209997			7195	501628	501162	-					410		-	0	0	0	0	0	0	0	0	0									CBU_0551
CBU_0552	221583	NP_819583.1	29653891	7195	501968	501618	-	501914	501963	Spotted	AAGTGCCGAACTTGCCAATTTAGTGATTAACACGCTTGATGAGCATAAAG	411		-	10	10	1	1	0	0	0	1	0	192	130	45	8	1	364.948	309.5	181.64	CBU_0552	iojap-related protein (NCBI)	799	S	Uncharacterized homolog of plant Iojap protein
CBU_0553					502001	502050		502001	502050	Spotted	CGCCCTTTAACCCTAACTTGTTTGAAATCCACAATCCCTTTATCATTAGG	412			2	2	0	0	0	0	0	0	0	2	2	2	1	0	757	757	124.451
CBU_0554	221585	NP_819585.2	215918997	7195	502093	503187	+					413		-	2	2	0	0	0	0	0	0	0	2	2	2	0	0	660	660	12.7279	CBU_0554	IS1111A transposase (RefSeq)	3547	L	Transposase and inactivated derivatives	GO:0006313,GO:0003677,GO:0004803
CBU_0554a	5437834	YP_002332971.1	215918998	7195	503456	503184	-					414		-	0	0	0	0	0	0	0	0	0									CBU_0554a	hypothetical protein (RefSeq)
CBU_0555	221586	NP_819586.1	29653894	7195	503753	503550	-	503666	503700	Spotted	TATCGTCATCGGCGTCATTTCGTCGGTTGCGCTAT	415		-	4	4	0	0	0	0	0	0	0	10	7	0	0	0	367.2	379.5	122.781	CBU_0555	hypothetical protein (NCBI)
CBU_0556	221587	NP_819587.2	215918999	7195	504627	503959	-	503959	504010	Spotted	ACCGAAAACCGTACTTACTTACATTAAAGCGCATAAGCTTTATCAACAATAA	416	80	operon	10	6	1	0	1	0	7	1	0	171	117	40	17	6	384.801	323	216.188	nadD	nicotinate (nicotinamide) nucleotide adenylyltransferase (RefSeq)	1057	H	Nicotinic acid mononucleotide adenylyltransferase	GO:0009435,GO:0004515	2.7.7.18	Nicotinate-nucleotide adenylyltransferase.
CBU_0557	221588	NP_819588.1	29653896	7195	505627	504608	-	504871	504920	Spotted	ATATTTTGCCGACAAAGAAGCGGGATTGCTGATATTATGGGCCATAACTC	416	80	operon	10	2	0	1	2	5	8	5	0	108	60	17	13	7	349.185	271.5	237.917	holA	DNA polymerase III, delta subunit (NCBI)	1466	L	DNA polymerase III, delta subunit	GO:0006260,GO:0009360,GO:0043625,GO:0003677,GO:0003893,GO:0016449,GO:0019984,GO:0003889,GO:0003894,GO:0015999,GO:0016450,GO:0003890,GO:0003895,GO:0016000,GO:0016451,GO:0003891,GO:0016448,GO:0016452	2.7.7.7	DNA-directed DNA polymerase.
CBU_0558	221589	NP_819589.1	29653897	7195	506181	505630	-	505665	505714	Spotted	GCGGACGATGGTGACATTGATTTATAATTATTTGGTTACGGGTTTAGCCC	416	80	operon	7	5	0	2	0	0	0	0	0	34	9	4	3	0	289.5	178.5	219.519	CBU_0558	hypothetical protein (NCBI)	2980	M	Rare lipoprotein B
CBU_0559	221590	NP_819590.1	29653898	7195	508633	506171	-	506911	506960	Spotted	CGAACCTTTTATTCGATTATTGACGCAAGGAATGGTCTTAAAAGACGGCG	416	80	operon	10	9	0	0	0	0	1	3	0	244	166	58	7	2	374.668	324	180.629	leuS	leucyl-tRNA synthetase (NCBI)	495	J	Leucyl-tRNA synthetase	GO:0006429,GO:0005737,GO:0004823,GO:0005524	6.1.1.4	Leucine--tRNA ligase.
CBU_0560	221591	NP_819591.1	29653899	7195	508773	510005	+	509934	509983	Spotted	TTATCGTCTGCTCAAAAGTCGCAGAATATTCCTATGACTCCGACTTCGAG	417		-	8	4	0	4	0	0	0	0	0	36	13	8	0	0	303.528	202.5	184.6	CBU_0560	hypothetical protein (NCBI)
CBU_0560a	5437835			7195	510503	510012	-					418		-	0	0	0	0	0	0	0	0	0									CBU_0560a
CBU_0562	221592	NP_819592.1	29653900	7195	512175	510895	-	510988	511039	Spotted	CGGACTCCTTGAGGCTTTAGAAAGCTACAATCTCAAAGAAGGTTATATTTTA	419		-	5	0	0	5	0	0	0	4	0	19	10	1	0	0	302.579	266	136.216	CBU_0562	hypothetical protein (NCBI)	1373	R	Predicted ATPase (AAA+ superfamily)
CBU_0562a	5437836	YP_002332972.1	215919000	7195	512827	512405	-					420		-	0	0	0	0	0	0	0	0	0									CBU_0562a	hypothetical protein (RefSeq)
CBU_0563	221593	NP_819593.1	29653901	7195	513032	512817	-	512817	512866	Spotted	GCTATACTGAGATAAATTCGGGGCATCAGGAGGATAAAGATGAAACTTAA	421		-	7	7	0	0	0	0	0	0	0	11	8	5	2	0	454.545	484	224.973	CBU_0563	hypothetical protein (NCBI)
CBU_0564	221594	NP_819594.1	29653902	7195	514509	513052	-	513312	513361	Spotted	TAACAAGCAATTTATCGTTGTGGTCAATGATGATAGCTGGTTCGCTGGAA	422	81	operon	10	10	1	0	0	0	0	0	0	131	75	19	6	1	328.794	274	180.998	cutE	apolipoprotein N-acyltransferase (NCBI)	815	M	Apolipoprotein N-acyltransferase	GO:0006807,GO:0042158,GO:0016021,GO:0016410,GO:0016810	2.3.1.-
CBU_0565	221595	NP_819595.2	215919001	7195	515353	514502	-	514504	514555	Spotted	ACTAAACGAAGTATTCAATTGCTGCATTTAACGAAGAAAACCGAAAATGAAT	422	81	operon	10	10	0	0	1	0	0	0	0	190	110	25	6	3	319.537	272	160.167	corC	CBS domain-containing protein (RefSeq)	4535	P	Putative Mg2+ and Co2+ transporter CorC
CBU_0566	221596	NP_819596.1	29653904	7195	516661	515396	-	515732	515781	Spotted	TTATTCTCATTTACGTTCCAGGCTTACCCCTTTCAGTGGCTTTAAGCTTG	423		-	7	7	0	0	0	0	0	0	0	22	8	7	0	0	346.136	218.5	222.875	CBU_0566	major facilitator family transporter (NCBI)	2271	G	Sugar phosphate permease	GO:0006810,GO:0016021,GO:0005215
CBU_0567	221597	NP_819597.1	29653905	7195	517175	516717	-	516832	516881	Spotted	GCGCAACATAAGACTACAGAAGCTCATTTTGCTCATTTAATTACCCATGG	424	82	operon	10	10	1	1	2	1	0	0	0	225	151	36	9	3	348.942	303	172.304	CBU_0567	conserved hypothetical protein TIGR00043 (NCBI)	319	R	Predicted metal-dependent hydrolase
CBU_0568	221598	NP_819598.1	29653906	7195	518143	517172	-	517253	517302	Spotted	TGCGACATGCCATTACTTTATTGCGTGACATCGACGAAATTCAATTTACC	424	82	operon	10	10	0	0	1	1	0	0	0	244	170	45	7	3	359.725	324	169.234	CBU_0568	PhoH family protein (NCBI)	1702	T	Phosphate starvation-inducible protein PhoH, predicted ATPase	GO:0016036,GO:0005524
CBU_0569	221599	NP_819599.1	29653907	7195	519473	518154	-	518165	518214	Spotted	GATGGTCACGATTAAAATTAAAGAAGCTCGCCCTTATTCACTCTGGGGTG	424	82	operon	10	10	0	1	1	0	0	2	0	266	160	45	7	3	344.259	296	174.928	CBU_0569	hypothetical protein (NCBI)	621	J	2-methylthioadenine synthetase	GO:0003824,GO:0051536
CBU_0570	221600	NP_819600.1	29653908	7195	521176	519494	-	519667	519718	Spotted	GGCGGTATTAATAAAATTCACTTCGGTTGGGATTTTCTATACCTTGCTATTT	424	82	operon	8	8	0	0	0	0	0	0	0	12	10	4	3	0	473.833	482	219.533	CBU_0570	amino acid permease family protein (NCBI)	531	E	Amino acid transporters	GO:0006865,GO:0016020,GO:0015171
CBU_0571	221601	NP_819601.1	29653909	7195	521816	521391	-	521665	521714	Spotted	ACGCCTATAGTTAAGGTAGAAAGCAATATTGAGGGCAACATTTGGCATCT	425		-	5	5	0	0	0	0	0	0	0	10	10	0	0	0	383.1	398	67.7765	CBU_0571	hypothetical protein (NCBI)
CBU_0572	221602	NP_819602.1	29653910	7195	522138	523514	+	523098	523147	Spotted	GAAGCGGTGAAAGAAGATCCCGATTTGATCATCGACTTTTCTACACTCAC	426	83	operon	10	10	0	0	0	0	0	1	0	201	110	25	1	0	319.244	271	144.802	CBU_0572	cytosol aminopeptidase family protein (NCBI)	260	E	Leucyl aminopeptidase	GO:0006508,GO:0005737,GO:0004178,GO:0030145	3.4.11.1	Leucyl aminopeptidase.
CBU_0573	221603	NP_819603.1	29653911	7195	523524	525671	+	525622	525671	Spotted	AAGCTTTTGCTGTACTTTATTGGGATGTATTGCAAGTGGATGAATTTTAA	426	83	operon	9	7	0	2	2	0	6	2	0	57	19	8	7	4	309.93	201	243.553	CBU_0573	acyl-CoA dehydrogenase family protein (NCBI)	1960	I	Acyl-CoA dehydrogenases	GO:0006118,GO:0003995,GO:0050660	1.3.99.-
CBU_0574	221604	NP_819604.1	29653912	7195	526216	527511	+	527180	527229	Spotted	TAACGCTTGAAGATATCGATTATTGGGAGATGAATGAAGCTTTTGCGGCC	427	84	operon	10	6	0	3	2	1	10	7	1	42	26	14	14	6	461.405	342.5	306.781	CBU_0574	acetyl-CoA acetyltransferase (NCBI)	183	I	Acetyl-CoA acetyltransferase	GO:0003985,GO:0003988	2.3.1.16	Acetyl-CoA C-acyltransferase.
CBU_0575					527571	527620		527571	527620	Spotted	ATTTTCCAGTGTTTGTAAGTTTGTAATTCCCGCATTTTACTCCCTCGCTG	428	84	operon	2	2	0	0	0	0	0	0	0	2	2	2	0	0	675	675	0
CBU_0576	221606	NP_819606.2	215919002	7195	527562	529613	+	529534	529583	Spotted	CCGATGTCGTGAAAACTTTAAAACGCTTAGCAAAACAATACGGTGAACGA	429	84	operon	10	10	2	4	3	1	5	6	1	54	28	13	7	6	374.907	263.5	262.296	yfcX	putative fatty oxidation complex, alpha subunit (RefSeq)	1250	I	3-hydroxyacyl-CoA dehydrogenase	GO:0006631,GO:0003857,GO:0016491,GO:0050662	1.1.1.35,4.2.1.17,5.1.2.3,5.3.3.8	3-hydroxyacyl-CoA dehydrogenase.,Enoyl-CoA hydratase.,3-hydroxybutyryl-CoA epimerase.,Dodecenoyl-CoA isomerase.
CBU_0577	221607	NP_819607.2	215919003	7195	529601	530377	+	530328	530377	Spotted	CCGTCTTATTGGTAAATGATTTGCATCTGAGGAATCAGAAAATAACGTGA	430		-	3	3	0	0	0	0	0	0	0	3	3	2	1	0	653.667	675	226.754	CBU_0577	hypothetical membrane spanning protein (RefSeq)
CBU_0578	221608	NP_819608.1	29653916	7195	531364	530390	-	530647	530696	Spotted	ACGTTTATTCAGTCTCGCTTTACACGGCATCTTTTCATTTTCGGATGTGC	431	85	operon	10	10	0	2	0	0	0	1	0	113	67	22	2	2	343.434	316	169.457	CBU_0578	glycosyl transferase, group 2 family protein (NCBI)	463	M	Glycosyltransferases involved in cell wall biogenesis		2.-.-.-,2.4.1.-	,
CBU_0579	221609	NP_819609.1	29653917	7195	532844	531351	-	531792	531843	Spotted	ACCCGTAATCGACAAAAGACGATTACTTCACTTTCTAAGCTTATATCTCATT	431	85	operon	3	2	1	2	0	0	0	0	0	38	10	3	3	1	264.211	204.5	189.935	CBU_0579	hypothetical protein (NCBI)	1807	M	4-amino-4-deoxy-L-arabinose transferase and related glycosyltransferases of PMT family
CBU_0580	221610	NP_819610.1	29653918	7195	532969	533790	+	533741	533790	Spotted	ACGTTCGATTAACGCGCTTTTACTTAGGCCATTCTTCCTCTAAATATTGA	432		-	2	2	0	2	0	0	0	0	0	36	9	2	2	1	248.611	197.5	169.952	CBU_0580	hypothetical protein (NCBI)	3394	S	Uncharacterized protein conserved in bacteria
CBU_0581	221611	NP_819611.1	29653919	7195	534095	533760	-	533760	533809	Spotted	CGGAGGTTCCCGATAAACTTCAATATTTAGAGGAAGAATGGCCTAAGTAA	433		-	10	10	0	0	0	0	0	0	0	93	48	12	0	0	305.065	258	148.545	CBU_0581	ferrodoxin (NCBI)	1146	C	Ferredoxin	GO:0006118,GO:0009055,GO:0051536
CBU_0582	221612	NP_819612.1	29653920	7195	534168	534407	+	534184	534233	Spotted	ATATCAAACAATGGATCGAAACGGGCTTATCGGAAAGTCGTGTGATTTCC	434	86	operon	9	9	0	1	0	0	0	0	0	37	16	5	2	1	314.946	224	198.048	CBU_0582	bolA protein, putative (NCBI)	5007	K	Predicted transcriptional regulator, BolA superfamily
CBU_0583	221613	NP_819613.1	29653921	7195	534410	534709	+	534660	534709	Spotted	ATATTGTGGGAGAATTATTCGAAACGGGCAAATTGCAGGAACTCTTGTAG	434	86	operon	10	10	0	1	0	0	0	1	0	111	64	19	1	1	329.982	269	170.53	CBU_0583	glutaredoxin-related protein (NCBI)	278	O	Glutaredoxin-related protein	GO:0045454,GO:0009055,GO:0015035
CBU_0584	221614	NP_819614.1	29653922	7195	534906	535223	+	535082	535131	Spotted	ATTAATAGGACTCGGAATTGGAAATGCGGTAGGGTTTGGGCTTAGTAGTG	435		-	2	2	0	0	0	0	0	0	0	3	3	0	0	0	461.667	495	57.735	CBU_0584	hypothetical protein (NCBI)
CBU_0585	221615	NP_819615.1	29653923	7195	535469	535266	-	535266	535308	Spotted	GCAACCTGCAAAGAAACCCTCAATTTGGGATTTTGAAGAATAA	436		-	7	7	0	0	0	0	0	0	0	7	7	2	0	0	468.714	418	100.869	CBU_0585	hypothetical protein (NCBI)
CBU_0586	221616	NP_819616.1	29653924	7195	535521	539036	+	538946	538995	Spotted	CGAACGATTATTACAAAACCGGACCCAAGAGATTTTATCGGACGTTTGGC	437		-	10	10	0	0	0	0	0	0	0	44	25	9	0	0	324.409	293	161.94	CBU_0586	hypothetical protein (NCBI)	493	ER	NADPH-dependent glutamate synthase beta chain and related oxidoreductases	GO:0006118,GO:0016020,GO:0005524,GO:0016887,GO:0051536,GO:0016491
CBU_0587	221617	NP_819617.1	29653925	7195	539081	539404	+	539307	539356	Spotted	ATTTGGTTGAGCAAGGTTTTAAAGAGGTCTACAGTTTAATCGGCGGCTTT	438		-	10	6	2	0	0	2	0	1	0	55	40	22	2	1	433.691	406	201.529	CBU_0587	glpE protein, putative (NCBI)	607	P	Rhodanese-related sulfurtransferase	GO:0004792	2.8.1.1	Thiosulfate sulfurtransferase.
CBU_0588	221618	NP_819618.1	29653926	7195	539484	540479	+	540365	540414	Spotted	CTTAATTACTGGCAGTAATGAAATTGTTTTAGATTCCGAAATCATGGCCA	439	87	operon	10	10	0	2	1	1	2	3	0	186	126	31	6	2	357.93	325.5	177.061	nadA	quinolinate synthetase (NCBI)	379	H	Quinolinate synthase	GO:0009435,GO:0008987
CBU_0589	221619	NP_819619.1	29653927	7195	540476	540874	+	540712	540761	Spotted	TATTGCAGTGGTTTATCCTGATGGTATTTGGTACCACTCCTGTACACCAG	439	87	operon	10	10	0	0	0	0	0	0	0	71	48	16	4	0	364.958	341	183.826	CBU_0589	ferredoxin 2fe-2s (NCBI)	3411	C	Ferredoxin
CBU_0590	221620	NP_819620.1	29653928	7195	540871	541044	+	541010	541044	Spotted	CGGGATCGGAAATGACAGAGCCTAAAACGGTCTAA	439	87	operon	7	7	0	0	0	0	0	0	0	7	7	6	4	0	712.143	825	186.716	CBU_0590	hypothetical protein (NCBI)
CBU_0591	221621	NP_819621.1	29653929	7195	541051	541875	+	541818	541869	Spotted	CGGCGTTATTAATATTCGAAAATATAGCGGTTATCACGTGGAATGTAATGTA	439	87	operon	10	10	0	0	0	0	0	0	0	35	16	9	4	0	344.143	208	236.904	CBU_0591	hypothetical protein (NCBI)
CBU_0592	221622	NP_819622.2	215919004	7195	541877	542194	+	542052	542103	Spotted	CCTGGAATTTACCTTCAGTCATTATCGAGTTTGCTTGGTTGTTAATTAGTTT	439	87	operon	7	7	0	0	0	0	0	0	0	7	7	6	4	0	689	825	185.228	CBU_0592	hypothetical membrane spanning protein (RefSeq)
CBU_0593	221623			7195	543317	542168	-	542287	542336	Spotted	TACTCACTTACATCTGGCTTACGCATTTGCCTATGCAGTTCTATTACCGG	440	88	operon	3	3	2	0	0	0	0	0	0	23	9	3	3	2	305.174	212	244.713	CBU_0593	CAAX amino terminal protease family protein (RefSeq)
CBU_0594					542699	542750		542699	542750	Spotted	CAATCGTTACCGTCCCCATGATTGTGGTTATTACTCTTTTGCTATTTTATAT	441	88	operon	3	3	2	0	0	0	0	0	0	3	3	3	3	2	915.667	923	43.4665
CBU_0595					543068	543119		543068	543119	Spotted	GTAAAGCTTATGAAATTTCCACATTATCGGAAAATCACACCATTGGAGAAAT	441	88	operon	3	3	2	0	0	0	0	0	0	3	3	3	3	2	920.333	937	45.3578
CBU_0596	221626	NP_819626.1	29653934	7195	544063	543314	-	543324	543373	Spotted	GATGCTAAAGCTGCTGGTTTTCAAGGCTTTGTTAAACGAGGACAAACATT	442	88	operon	4	4	0	0	0	0	0	0	0	25	7	3	3	0	283.16	197	227.512	CBU_0596	hypothetical protein (NCBI)	1234	R	Metal-dependent hydrolases of the beta-lactamase superfamily III	GO:0016787
CBU_0596a	5437837	YP_002332973.1	215919005	7195	544319	544558	+					443		-	0	0	0	0	0	0	0	0	0									CBU_0596a	hypothetical protein (RefSeq)
CBU_0597	221627	NP_819627.1	29653935	7195	545803	544676	-	544838	544887	Spotted	AATTACCCCTTGAATTTATGATGAACGCCCTCCGATTGCAAAAGCCTATC	444		-	10	10	0	0	1	0	1	2	0	203	122	48	7	1	366.532	316	185.151	CBU_0597	oxygen-independent coproporphyrinogen III oxidase, putative (NCBI)	635	H	Coproporphyrinogen III oxidase and related Fe-S oxidoreductases	GO:0006779,GO:0005737,GO:0004109,GO:0051989,GO:0051536	1.3.99.22	Coproporphyrinogen dehydrogenase.
CBU_0598	221628	NP_819628.2	215919006	7195	545856	546419	+	546011	546062	Spotted	TGTTATGATTATCCCTTTATTGGATGAAGATACAGTATTGTTGGTACGCGAA	445	89	operon	10	10	0	0	0	0	0	0	0	110	72	18	1	0	338.791	305.5	152.695	nudE	ADP-ribose diphosphatase NudE (RefSeq)				GO:0016787	3.6.1.-,3.6.1.13,3.6.1.22,3.6.1.29	,ADP-ribose diphosphatase.,NAD(+) diphosphatase.,Bis(5'-adenosyl)-triphosphatase.
CBU_0599	221629	NP_819629.1	29653937	7195	546409	547224	+	547118	547167	Spotted	AATTGCGATACAACGAGAAGAATTCCCTTATGAATCCAGCCTTTGTAGCG	445	89	operon	8	8	0	0	0	0	0	0	0	60	26	3	1	0	278.95	240	136.847	cysQ-1	3'(2'),5'-bisphosphate nucleotidase (NCBI)	1218	P	3'-Phosphoadenosine 5'-phosphosulfate (PAPS) 3'-phosphatase	GO:0004437,GO:0008441	3.1.3.7	3'(2'),5'-bisphosphate nucleotidase.
CBU_0600	221630			7195	547417	549017	+	547634	547683	Spotted	ACCCAAGCCACAAACTTTCCTCAAGCGAATTTAAGGAAAATAGCTTATGA	446		-	4	4	2	0	0	0	0	0	0	5	5	2	2	1	638.8	498	243.049	CBU_0600	hypothetical protein (RefSeq)
CBU_0601					548162	548211		548162	548211	Spotted	ATCAAGCAATGGTGTAATGCGAAACACGTAGATTTGGAGTCAACCAATGA	447		-	4	4	2	0	0	0	0	0	0	5	5	2	2	1	598.2	431	269.609
CBU_0602					548896	548945		548896	548945	Spotted	ATCAAACTACAGTTCAAATGCGTGTCTATAAAGAGCATTCTTCTCCCATC	447		-	2	2	0	0	0	0	0	0	0	5	4	2	2	0	505	277	329.52
CBU_0603	221633			7195	550458	549346	-	549823	549874	Spotted	CCAAGGGACAGGCTTCATTTTATTCTATTGATAGTAACAACTCTGATCAATT	448		-	3	3	2	0	0	0	0	0	0	3	3	2	1	1	636.667	517	260.043	CBU_0603	hypothetical protein (RefSeq)
CBU_0604					549976	550025		549976	550025	Spotted	CGCATCATGGACTTATTAATTTGGAACGAGGCCAATTAGCAACAGCAATT	449		-	3	3	1	0	0	0	0	0	0	3	3	3	1	1	708	634	200.517
CBU_0605	221635			7195	550607	551779	+	551034	551083	Spotted	TAGATCAACTATGTGAGCGGTTGGATAAATTCAATGGGCGTTTGGAACAG	450		-	3	3	1	0	0	0	0	0	0	3	3	3	1	1	693.667	634	212.867	CBU_0605	hypothetical protein (RefSeq)
CBU_0606					551601	551650		551601	551650	Spotted	GGGAGAGCACAACGAAAGTTAATCAATACCTTGTTATGGGACGTCAACAA	451		-	3	3	1	0	0	0	0	0	0	3	3	2	1	1	647.667	555	249.272
CBU_0607	221637	NP_819637.1	29653945	7195	553433	551922	-	552072	552121	Spotted	GCAATCAGCTAATTGAAAACGAATACGATCACGTTCTCATCGGATTCACC	452	90	operon	10	9	0	3	0	0	2	3	0	51	31	5	4	1	318.275	269	198.398	mvaD	diphosphomevalonate decarboxylase (NCBI)	3407	I	Mevalonate pyrophosphate decarboxylase	GO:0016310,GO:0008299,GO:0004163,GO:0016301,GO:0004452,GO:0005524,GO:0016787	4.1.1.33,5.3.3.2	Diphosphomevalonate decarboxylase.,Isopentenyl-diphosphate Delta-isomerase.
CBU_0608	221638	NP_819638.1	29653946	7195	554367	553426	-	553498	553547	Spotted	GTGTCATTGGCATTGGTACATTAAAACCCGATCGATTTCCGCGAAATAAT	452	90	operon	10	9	0	5	0	4	1	1	0	48	22	10	4	4	352.042	236.5	244.972	CBU_0608	phosphomevalonate kinase, putative (NCBI)	1577	I	Mevalonate kinase	GO:0008299,GO:0016310,GO:0032259,GO:0005737,GO:0003676,GO:0008168,GO:0004496,GO:0005524	2.7.1.36	Mevalonate kinase.
CBU_0609	221639	NP_819639.1	29653947	7195	555488	554466	-	554466	554515	Spotted	CCATCATTCCCATTCAAACCGACAGTCAAGGGACTTGTATTATCGAATAA	452	90	operon	10	9	0	4	0	3	1	1	0	37	14	5	4	3	328.243	215	245.199	CBU_0609	mevalonate kinase, putative (NCBI)	1577	I	Mevalonate kinase	GO:0016310,GO:0008299,GO:0005737,GO:0004496,GO:0005524	2.7.1.36	Mevalonate kinase.
CBU_0610	221640	NP_819640.1	29653948	7195	556558	555485	-	555682	555731	Spotted	GTTGCCTAATATCATTGTAGGAACGGTAGGCAATGGTAAGCATTACGATT	452	90	operon	10	8	0	4	0	0	4	2	1	31	20	7	5	2	408.968	344	251.581	CBU_0610	3-hydroxy-3-methylglutaryl Coenzyme A reductase (NCBI)	1257	I	Hydroxymethylglutaryl-CoA reductase	GO:0015936,GO:0004420,GO:0050662	1.1.1.34	Hydroxymethylglutaryl-CoA reductase (NADPH).
CBU_0611	221641	NP_819641.1	29653949	7195	556738	559149	+	558830	558879	Spotted	TGATATTGCCGCAATTTATTAGCGAAAGGGTACGTACCGCCATTGTTTTC	453	91	operon	10	8	0	4	0	0	0	5	0	143	79	26	14	4	342.259	265	209.964	CBU_0611	surface antigen, putative (NCBI)	4775	M	Outer membrane protein/protective antigen OMA87	GO:0019867
CBU_0612	221642	NP_819642.1	29653950	7195	559227	559724	+	559625	559674	Spotted	CGAGAGAGAAAATCTCGATCTCGTTTTGCCTAAAGATACCGTACTTTATG	453	91	operon	10	10	0	0	3	0	0	1	0	104	65	21	7	3	362.942	298	200.55	CBU_0612	outer membrane protein OmpH, putative (NCBI)	2825	M	Outer membrane protein	GO:0005515
CBU_0613	221643	NP_819643.1	29653951	7195	559734	560762	+	560420	560469	Spotted	TGGTAACGGCGTAAAGATAGATGATTTGGTGATGATCGCTCATAACGTCC	453	91	operon	10	9	0	5	5	1	3	3	1	220	140	41	17	7	357.832	299	200.363	lpxD	UDP-3-O-[3-hydroxymyristoyl] glucosamine N-acyltransferase (NCBI)	1044	M	UDP-3-O-[3-hydroxymyristoyl] glucosamine N-acyltransferase	GO:0009245,GO:0008415,GO:0043764	2.3.1.-
CBU_0614	221644	NP_819644.1	29653952	7195	560759	561196	+	561065	561114	Spotted	GAGCCTGGAGATCAATTAACTTTAGAGGTGAAAGTATTAAAAGTTCACCG	453	91	operon	10	10	1	2	5	0	2	7	0	245	171	61	26	10	405.245	364	217.663	fabZ	(3R)-hydroxymyristoyl-(acyl carrier protein) dehydratase (NCBI)	764	I	3-hydroxymyristoyl/3-hydroxydecanoyl-(acyl carrier protein) dehydratases	GO:0006633,GO:0005737,GO:0016836	4.2.1.-
CBU_0615	221645	NP_819645.1	29653953	7195	561201	561980	+	561907	561956	Spotted	AAACGCCCGAGATCAGTCACTTATTGAATATGATTAATACCTCCAGCCGT	453	91	operon	10	10	0	3	2	1	3	5	1	187	119	50	20	7	386.856	323	223.651	lpxA	UDP-N-acetylglucosamine acyltransferase (NCBI)	1043	M	Acyl-[acyl carrier protein]--UDP-N-acetylglucosamine O-acyltransferase	GO:0008610,GO:0008780	2.3.1.129	Acyl-[acyl-carrier-protein]--UDP-N-acetylglucosamine O-acyltransferase.
CBU_0616	221646	NP_819646.1	29653954	7195	561977	562567	+	562400	562449	Spotted	TTAGTGATTGATGACCGCTTAACTTCAGGTATATTATCCGCCTGTCTCAT	453	91	operon	7	7	0	1	0	0	0	0	0	30	11	5	4	0	324.433	203.5	237.755	CBU_0616	hypothetical protein (NCBI)	2179	R	Predicted hydrolase of the HAD superfamily
CBU_0617	221647	NP_819647.2	215919007	7195	564177	562660	-	562660	562709	Spotted	ATCGTTATCAGACTACCATTGCTAATTTTGCTATTTATGGACGGGGATAA	454	92	operon	4	4	0	0	0	0	0	0	0	9	7	2	1	0	406.333	318	229.39	CBU_0617	hypothetical membrane spanning protein (RefSeq)
CBU_0618	221648	NP_819648.2	215919008	7195	565276	564182	-	564204	564253	Spotted	AATTTATTAACTCGCGTTAAGCCATTCTCTAAGCCGATTGCCGTTAGCAC	454	92	operon	4	4	0	0	0	0	0	0	0	27	9	2	1	0	254.111	176	171.242	CBU_0618	acyltransferase family (RefSeq)	1835	I	Predicted acyltransferases	GO:0016747
CBU_0619	221649	NP_819649.1	29653957	7195	565820	565332	-	565574	565624	Spotted	GCATTGATACATCTGTCTCAGGATTTCAATTTCAAATAAATACAAACGGCC	455		-	4	4	0	0	0	0	0	0	0	9	7	4	0	0	428.778	381	182.096	CBU_0619	hypothetical protein (NCBI)
CBU_0620	221650	NP_819650.1	29653958	7195	567108	565978	-	566075	566126	Spotted	CCATCGCCGATGAAGTTTTCCAATTGCTAAATAATCACAATTATCGGCAATC	456	93	operon	10	10	0	8	2	0	3	5	0	172	121	41	15	7	382.686	320.5	215.685	lpxB	lipid-A-disaccharide synthase (NCBI)	763	M	Lipid A disaccharide synthetase	GO:0009245,GO:0008915	2.4.1.182	Lipid-A-disaccharide synthase.
CBU_0621	221651	NP_819651.1	29653959	7195	568081	567098	-	567118	567167	Spotted	TTCGTTAATTGTGCGACGTACCAATGAACAATTTCCGATTTCACCCATCG	456	93	operon	10	10	0	2	0	0	0	0	1	125	80	23	5	1	365.56	354	180.334	CBU_0621	oxidoreductase family protein (NCBI)	673	R	Predicted dehydrogenases and related proteins	GO:0016491
CBU_0622	221652	NP_819652.2	215919009	7195	568273	568719	+	568459	568501	Spotted	AAACGAGTCGGCAATTACCGTTTAGTAGACACTACGCTCTACG	457	94	operon	10	8	2	0	0	0	0	0	0	184	127	33	2	0	358.804	337.5	149.884	CBU_0622	zinc-binding domain-containing protein (RefSeq)	590	FJ	Cytosine/adenosine deaminases	GO:0008270,GO:0016787
CBU_0623	221653	NP_819653.1	29653961	7195	568724	568846	+	568797	568846	Spotted	TCATCGTTTGTCCTATTCCGCAGGTATTAATGGAATCACCCGATATTTGA	457	94	operon	4	4	0	0	0	0	0	0	0	9	9	4	1	0	475.111	378	193.031	CBU_0623	hypothetical protein (NCBI)
CBU_0624	221654	NP_819654.1	29653962	7195	568946	569080	+	568956	568988	Spotted	GGGCGTGCTTGAAAATCACCGCTGTTGAAGAGC	458		-	5	5	0	0	0	0	0	0	0	9	9	2	0	0	408	420	132.586	CBU_0624	hypothetical protein (NCBI)
CBU_0625	221655	NP_819655.1	29653963	7195	569281	569688	+	569587	569638	Spotted	GCTGCCGACAATTTGAAGGAATATATTGCATTAGAAATTGGTCGAAAATTTT	459		-	2	2	0	0	0	0	0	0	0	9	6	1	0	0	329.556	278	134.93	CBU_0625	hypothetical protein (NCBI)
CBU_0626	221656	NP_819656.1	29653964	7195	569797	571884	+	571835	571884	Spotted	CTTCCGATGAATTAAAATCAACATCCTCGACCCCAAGAATGAATACTTAA	460		-	6	1	0	5	0	0	0	0	0	44	12	1	0	0	239.636	201.5	103.198	CBU_0626	hypothetical protein (NCBI)
CBU_0627	221657	NP_819657.1	29653965	7195	572132	572010	-	572020	572069	Spotted	GGTAATGATACGATTACAACAACTCCCCAACGAGGAGGAATTGGATATTC	461		-	2	2	0	0	0	0	0	0	0	4	4	1	0	0	421	391	162.37	CBU_0627	hypothetical protein (NCBI)
CBU_0628	221658	NP_819658.1	29653966	7195	572267	572794	+	572661	572712	Spotted	CCATTTCTCACTTCTTTGAACGTTATAAAGATTTAGAGCCAAATAAATGGGC	462		-	10	2	0	0	6	0	8	2	0	230	157	52	9	5	375.096	336	186.283	ppa	inorganic pyrophosphatase (NCBI)	221	C	Inorganic pyrophosphatase	GO:0006796,GO:0005737,GO:0000287,GO:0004427	3.6.1.1	Inorganic diphosphatase.
CBU_0629	221659	NP_819659.1	29653967	7195	572913	576053	+	575733	575783	Spotted	CGTTATAAGCGAGAAAATTTGAATAAAGTTATCGAAGAAATCAACGGGCTG	463		-	10	2	0	0	0	0	10	1	0	71	43	15	12	3	385.817	299	253.102	putA	proline dehydrogenase/delta-1-pyrroline-5-carboxylate dehydrogenase (NCBI)	4230	C	Delta 1-pyrroline-5-carboxylate dehydrogenase	GO:0006562,GO:0006537,GO:0006561,GO:0003842,GO:0004657	1.5.1.12,1.5.99.8	1-pyrroline-5-carboxylate dehydrogenase.,Proline dehydrogenase.
CBU_0630	221660	NP_819660.1	29653968	7195	576126	576818	+	576296	576345	Spotted	AATGGGGTTAAGCGATGCTTATTTAGGCAAAGAAACCCAGATGACTGAAG	464		-	10	10	0	0	2	0	0	0	0	164	84	13	0	0	297.89	256.5	123.675	mip	peptidyl-prolyl cis-trans isomerase (NCBI)	545	O	FKBP-type peptidyl-prolyl cis-trans isomerases 1	GO:0006457,GO:0016020,GO:0003755,GO:0030051,GO:0004600,GO:0042027	5.2.1.8	Peptidylprolyl isomerase.
CBU_0631	221661	NP_819661.2	215919010	7195	576860	580834	+	580269	580318	Spotted	GGGCGCAAGTTATTTTAATGCATCCCAAAATACGCGATAAATTCAGTCTA	465		-	10	4	1	3	8	1	3	9	0	111	67	17	5	4	354.243	304	195.51	purL	phosphoribosylformylglycinamidine synthase (RefSeq)	46	F	Phosphoribosylformylglycinamidine (FGAM) synthase, synthetase domain	GO:0006189,GO:0004642	6.3.5.3	Phosphoribosylformylglycinamidine synthase.
CBU_0632	221662	NP_819662.1	29653970	7195	581193	580894	-	581003	581052	Spotted	GAATTAGCCGACATATTAGCCCACAATCGTGATGAAGAGAAAGAACACGC	466		-	6	6	0	0	0	0	0	0	0	24	16	1	0	0	310.792	296.5	121.142	CBU_0632	hypothetical protein (NCBI)	3461	S	Uncharacterized conserved protein	GO:0016491,GO:0046914
CBU_0633					581357	581406		581357	581406	Spotted	GGATCAAGATGGGATGTTAAATGGCCATGAATTCTATGAAAGAAAGCGTA	467		-	4	4	0	0	0	0	0	0	0	4	4	2	0	0	514.75	508	87.8725
CBU_0634	221664	NP_819664.2	215919011	7195	581377	583269	+	583218	583269	Spotted	GCCGGTAACCGTCGAAGAAATTAGAAGAGCACTTTTAGATTATCTATTCTAA	468		-	6	5	2	2	0	0	0	0	2	47	15	5	3	0	269.021	200	176.051	CBU_0634	putative aerobic respiration control sensor protein arcB (RefSeq)	642	T	Signal transduction histidine kinase	GO:0006355,GO:0000160,GO:0016310,GO:0018106,GO:0016020,GO:0000155,GO:0000156,GO:0005524
CBU_0635	221665	NP_819665.1	29653973	7195	583288	584778	+	584719	584770	Spotted	GTTGATAACGATAATGATATGCCTGAACCTTCTGATAACCGTTTAATGACAT	469		-	3	3	0	0	0	0	0	0	0	4	4	2	1	0	594	602.5	196.229	CBU_0635	hypothetical protein (NCBI)
CBU_0636	221666	NP_819666.1	29653974	7195	584821	585714	+	585590	585639	Spotted	TCTGGAAAGAAAACATTACTCTACTGACAATAGCGGGAATTTTGCTGGTA	470		-	10	10	0	0	0	0	0	0	0	75	37	6	0	0	285.787	249	127.58	CBU_0636	hypothetical protein (NCBI)	5006	R	Predicted permease, DMT superfamily	GO:0016020
CBU_0637	221667	NP_819667.1	29653975	7195	586494	585733	-	585791	585840	Spotted	AAAGAAAGTAAGATAAATCGAGAATTATTACGAAAGGGTGCCTTAACGGC	471		-	1	0	0	2	0	0	0	0	0	37	9	0	0	0	220.595	207	57.3544	CBU_0637	hypothetical protein (NCBI)	5424	H	Pyrroloquinoline quinone (Coenzyme PQQ) biosynthesis protein C
CBU_0638	221668	NP_819668.1	29653976	7195	588048	586912	-	587238	587287	Spotted	TCCTCAAGGACTGTATGTTCCCGTATTAAAAGATGTCAGCCATCAGGATG	472	95	operon	10	6	1	3	0	1	10	5	0	37	26	19	17	6	561	542	331.543	CBU_0638	dihydrolipoamide acetyltransferase (NCBI)	508	C	Pyruvate/2-oxoglutarate dehydrogenase complex, dihydrolipoamide acyltransferase (E2) component, and related enzymes	GO:0008152,GO:0009351,GO:0004742,GO:0005515,GO:0008415	2.3.1.12	Dihydrolipoyllysine-residue acetyltransferase.
CBU_0639	221669	NP_819669.1	29653977	7195	589028	588048	-	588048	588097	Spotted	GCGCGGATCGAATTATTAAAACCGTCCAATCATTAATGGAGTTTTCTTAA	472	95	operon	10	8	2	4	0	5	10	7	0	129	72	32	21	8	390.783	287	259.298	CBU_0639	dehydrogenase, E1 component, beta subunit, putative (NCBI)	22	C	Pyruvate/2-oxoglutarate dehydrogenase complex, dehydrogenase (E1) component, eukaryotic type, beta subunit	GO:0008152,GO:0004739	1.2.4.1	Pyruvate dehydrogenase (acetyl-transferring).
CBU_0640	221670	NP_819670.1	29653978	7195	590339	589233	-	589296	589345	Spotted	AAGCCACGGACATGTTTGATTATCTTTATGCAGAACTTCCGGTATCGTTA	472	95	operon	10	8	2	4	0	2	9	8	1	87	54	23	20	7	415.678	307	274.974	CBU_0640	dehydrogenase, E1 component, alpha subunit (NCBI)	1071	C	Pyruvate/2-oxoglutarate dehydrogenase complex, dehydrogenase (E1) component, eukaryotic type, alpha subunit	GO:0008152,GO:0004739,GO:0016624	1.2.4.1	Pyruvate dehydrogenase (acetyl-transferring).
CBU_0641	221671	NP_819671.2	215919012	7195	591484	590336	-	590631	590682	Spotted	TGGGCGGCGTTATCAATTTAAATACTTTAAATCGAATTAAAGCCCCTATTAT	472	95	operon	10	7	0	0	0	0	4	2	0	40	25	11	5	2	405.275	307	247.067	CBU_0641	leucine dehydrogenase (RefSeq)	334	E	Glutamate dehydrogenase/leucine dehydrogenase	GO:0006520,GO:0016491,GO:0050049	1.4.1.9	Leucine dehydrogenase.
CBU_0642	221672	NP_819672.1	29653980	7195	591520	592272	+	592223	592272	Spotted	CTCAAGGAGTCGATGCCGTTGTTAGCGATAATCCAGAGTTACTGAAATGA	473	96	operon	10	10	0	0	0	0	0	0	0	121	55	9	1	0	282.884	240	140.548	CBU_0642	glycerophosphoryl diester phosphodiesterase, putative (NCBI)	584	C	Glycerophosphoryl diester phosphodiesterase	GO:0006071,GO:0008889	3.1.4.46	Glycerophosphodiester phosphodiesterase.
CBU_0643	221673	NP_819673.1	29653981	7195	592269	593333	+	593069	593118	Spotted	TCGTAGGTCTGAAGGATTAGACTTAAATGAAGTGCTTGACGTCATTGGCA	473	96	operon	10	10	0	4	0	2	1	2	0	202	125	45	10	3	352.842	295	191.832	ribD	riboflavin biosynthesis protein RibD (NCBI)	117	H	Pyrimidine deaminase	GO:0009231,GO:0004023,GO:0008703,GO:0004024,GO:0008835,GO:0004025,GO:0008270	1.1.1.1,1.1.1.193,3.5.4.26	Alcohol dehydrogenase.,5-amino-6-(5-phosphoribosylamino)uracil reductase.,Diaminohydroxyphosphoribosylaminopyrimidine deaminase.
CBU_0644	221674	NP_819674.1	29653982	7195	593649	593311	-	593343	593392	Spotted	TATTCATATTATTTGCGACGTTAGAAAGGATATGAAGAGCCTTCTTCTGC	474	97	operon	1	1	0	1	0	0	0	0	0	18	7	1	1	1	272	194.5	190.087	CBU_0644	hypothetical protein (NCBI)
CBU_0645	221675	NP_819675.1	29653983	7195	593918	593655	-	593655	593704	Spotted	GTCAATTTCGTTCTGCCGACGATGTATTTGCCGATTTGGATAAAGATTAA	474	97	operon	1	1	0	1	0	0	0	0	0	17	10	1	1	1	303.706	268	187.53	CBU_0645	hypothetical protein (NCBI)
CBU_0646	221676	NP_819676.2	215919013	7195	594273	594896	+	594293	594342	Spotted	TACAGGCATTATTAATCATTGTGGTGAAATACGGTCGATGGAGGCATTGC	475	98	operon	10	10	0	3	0	0	2	3	0	200	143	48	10	4	386.565	341.5	191.256	ribE	riboflavin synthase alpha chain (RefSeq)	307	H	Riboflavin synthase alpha chain	GO:0009349,GO:0004746,GO:0005529	2.5.1.9	Riboflavin synthase.
CBU_0647	221677	NP_819677.2	215919014	7195	594937	596100	+	595942	595991	Spotted	AATAATCCCAATAAAGTAGAAAGCTTAACGCGGTATGGCATTTCTGTTGC	475	98	operon	10	6	1	3	0	0	7	3	0	207	128	31	16	3	354.15	298	189.27	ribA	3,4-dihydroxy-2-butanone 4-phosphate synthase domain/GTP cyclohydrolase II domain protein (RefSeq)	108	H	3,4-dihydroxy-2-butanone 4-phosphate synthase	GO:0009231,GO:0003935,GO:0008686	3.5.4.25	GTP cyclohydrolase II.
CBU_0648	221678	NP_819678.1	29653986	7195	596097	596552	+	596502	596552	Spotted	GCGGTGTCAATGATAAAGTTAATGAAAGAAATCGAGATCACTGATGAGTAA	475	98	operon	10	10	1	3	0	1	2	2	0	223	151	44	9	3	370.43	341	175.312	ribH	6,7-dimethyl-8-ribityllumazine synthase (NCBI)	54	H	Riboflavin synthase beta-chain	GO:0009231,GO:0009349,GO:0004746	2.5.1.-,6.3.3.-	,
CBU_0649	221679	NP_819679.1	29653987	7195	596545	597636	+	597394	597445	Spotted	CATTTTGCGTATTTAATGATTGTTTACGCCATAATTATCACTTTGGATGGGA	476		-	10	10	0	2	0	0	0	0	0	121	64	17	3	0	326.38	277	170.152	CBU_0649	hypothetical protein (NCBI)	628	R	Predicted permease
CBU_0650	221680			7195	597809	599033	+	598525	598576	Spotted	AGGCTGATTCAGAGGAACTCTTCTGAGTCTTTTATTTCTGAGTCTTTTATTA	477		-	10	10	0	0	0	0	0	0	0	11	9	5	1	0	515.182	449	217.532	CBU_0650	hypothetical protein (RefSeq)
CBU_0651					598873	598922		598873	598922	Spotted	AAGATGATGAAATTGAGAGTCCTAATTCTCTTATGTTGCGTCTCATCAAC	478		-	5	5	0	0	0	0	0	0	0	11	9	5	1	0	487	384	235.261
CBU_0652	221682			7195	599067	599909	+	599199	599248	Spotted	GATATAACTGAGTCATTAGGAGACCTTGTAGTAACACCAGAAAGGCCGCC	479		-	5	5	1	0	0	0	0	0	0	5	5	5	2	1	762.6	743	132.031	CBU_0652	hypothetical protein (RefSeq)
CBU_0653					599793	599842		599793	599842	Spotted	CATACTGCCTTAGGGAAATTGCGTTCTGAGCATCCAGAATATTGGATTCC	480		-	5	5	1	0	0	0	0	0	0	9	9	5	2	1	559.778	612	257.31
CBU_0654	221684			7195	599933	601422	+	600033	600084	Spotted	CGGCTATTTTAATACAGATTCTCTGTACGAGTCTTACGCATACATTGGAAAA	481		-	5	5	1	0	0	0	0	0	0	5	5	5	3	1	755.2	760	114.772	CBU_0654	hypothetical protein (RefSeq)
CBU_0655					601254	601303		601254	601303	Spotted	TGCGGAAAATAGTCGAGCCGATGACTTATTGGATGAATTTTATGCAGCAG	482		-	5	5	1	0	0	0	0	0	0	9	9	5	1	1	477.444	520	224.05
CBU_0656	221686	NP_819686.1	29653994	7195	601757	601425	-	601526	601575	Spotted	GCTCCTCAAAGAATCTAAAGAAGTGATTGAAGATCTTATCAAAGCCGCGC	483	99	operon	10	10	1	0	1	0	0	0	0	146	68	10	3	1	291.308	233	147.645	CBU_0656	conserved hypothetical protein TIGR00103 (NCBI)	718	S	Uncharacterized protein conserved in bacteria
CBU_0657	221687	NP_819687.1	29653995	7195	602376	601771	-	601861	601910	Spotted	TTGCAAATCACATCGATCACACTAAAATAAAATGTTCGCGCATCGCTCAC	483	99	operon	10	8	1	3	1	2	0	6	0	248	156	57	11	3	363.617	307.5	182.953	recR	recombination protein RecR (NCBI)	353	L	Recombinational DNA repair protein (RecF pathway)	GO:0006310,GO:0006281,GO:0006304,GO:0005622,GO:0003676,GO:0043565
CBU_0658	221688	NP_819688.1	29653996	7195	602819	602388	-	602463	602512	Spotted	TGCAAAGCATGCGTATTCCTGAAGATATCCGAAATCTTTCTGTAGAAGAA	483	99	operon	6	4	0	2	0	0	0	0	1	33	11	5	2	0	284.242	210	181.675	CBU_0658	hypothetical protein (NCBI)
CBU_0659	221689	NP_819689.1	29653997	7195	604458	602929	-	602976	603025	Spotted	AAGAATGATGAATGATCGTCAGGTTCAGCGGATAATGCAAACTTTCGACG	483	99	operon	10	7	0	1	1	6	8	7	1	268	189	60	19	9	382.601	338	196.395	dnaZX	DNA polymerase III, gamma and tau subunits (NCBI)	2812	L	DNA polymerase III, gamma/tau subunits	GO:0006260,GO:0005634,GO:0009360,GO:0003677,GO:0003893,GO:0016000,GO:0016451,GO:0003889,GO:0003894,GO:0016448,GO:0016452,GO:0003890,GO:0003895,GO:0016449,GO:0017111,GO:0003891,GO:0005524,GO:0015999,GO:0016450,GO:0019984	2.7.7.7	DNA-directed DNA polymerase.
CBU_0660	221690	NP_819690.1	29653998	7195	604626	604462	-	604581	604623	Spotted	ATTAATTACGAACATTTACTGAGTACTGGCAGCCGCAGGGGTC	483	99	operon	4	4	0	0	0	0	0	0	0	9	7	4	1	0	419.111	287	224.083	CBU_0660	hypothetical protein (NCBI)
CBU_0661	221691	NP_819691.1	29653999	7195	605024	605434	+	605374	605424	Spotted	TGGCCAGCAATTGAAAGATCTCTCTTATCAATCTTCATTTATTAGCTTCTT	484		-	7	3	0	4	0	0	0	0	0	25	11	7	1	0	363.8	232	234.006	CBU_0661	hypothetical protein (NCBI)
CBU_0662	221692	NP_819692.1	29654000	7195	605424	605540	+	605491	605540	Spotted	GTGTGATTTGCATCGATACCCTGTTTGAGAATTTGGCTGCTTTACTCTGA	485		-	3	3	0	0	0	0	0	0	0	9	6	3	1	0	419.111	287	242.086	CBU_0662	hypothetical protein (NCBI)
CBU_0663	221693	NP_819693.1	29654001	7195	605572	605676	+	60808	60842	Spotted	CCCCTGGATGTGGAGCGCCATTTGTGGGTAATTTG	486		-	4	4	0	0	0	0	0	0	0	9	6	3	0	0	409.778	264	229.661	CBU_0663	hypothetical protein (NCBI)
CBU_0664	221694	NP_819694.1	29654002	7195	605781	606926	+	606704	606753	Spotted	GCACTGGGCTATTGAAAATCAACTCCATTGGAAATTGGATATTGGTTTGG	487		-	4	4	0	0	0	0	0	0	0	10	5	4	0	0	352.2	253.5	181.167	CBU_0664	transposase, ISAs1 family (NCBI)	5433	L	Transposase	GO:0006313,GO:0003677,GO:0004803
CBU_0665	221695	NP_819695.1	29654003	7195	607018	608004	+	607730	607781	Spotted	ACTCACAAAGAAGTCAATCGCTTCAAAAGCTAGTATTGGATTGTAATTATCT	488		-	2	2	0	0	0	0	0	0	0	9	4	1	0	0	301.889	194	156.752	CBU_0665	hypothetical protein (NCBI)
CBU_0666	221696	NP_819696.1	29654004	7195	609142	608018	-	608373	608423	Spotted	GGGTGCTGCCAATGTTATTCCTGCGACGTTAAAGGCAAAATTTAATTTTCG	489	100	operon	10	8	0	3	0	0	2	4	0	163	104	31	5	2	350	323	175.813	dapE	succinyl-diaminopimelate desuccinylase (NCBI)	624	E	Acetylornithine deacetylase/Succinyl-diaminopimelate desuccinylase and related deacylases	GO:0006508,GO:0009089,GO:0046983,GO:0008237,GO:0009014	3.5.1.18	Succinyl-diaminopimelate desuccinylase.
CBU_0667	221697	NP_819697.1	29654005	7195	609963	609148	-	609204	609253	Spotted	CTCTAAAGACGGCCACTACAATCGTTACAGCGCAATCATCGTTAAACAAG	489	100	operon	10	10	0	2	3	0	2	4	0	130	78	26	8	3	356.092	288	195.723	dapD	2,3,4,5-tetrahydropyridine-2,6-dicarboxylate N-succinyltransferase (NCBI)	2171	E	Tetrahydrodipicolinate N-succinyltransferase	GO:0009089,GO:0008666,GO:0016757	2.3.1.117	2,3,4,5-tetrahydropyridine-2,6-dicarboxylate N-succinyltransferase.
CBU_0668	221698	NP_819698.1	29654006	7195	610139	609960	-	610006	610057	Spotted	GCGCAAACTTGATAAATCTAAAACAAGATGGCAAGTTACGTAATTATCCTCT	489	100	operon	3	3	0	0	0	0	0	0	0	4	4	3	2	0	691.5	764.5	232.979	CBU_0668	hypothetical protein (NCBI)
CBU_0669	221699	NP_819699.1	29654007	7195	610139	610312	+	610147	610197	Spotted	ACGGTTCCTTCGATGGGTATTCATAGAAGAAATATACCAAAAGATTGTTTT	490		-	4	4	0	0	0	0	0	0	0	4	4	3	0	0	615.5	669.5	111.787	CBU_0669	hypothetical protein (NCBI)
CBU_0670	221700	NP_819700.2	215919015	7195	610563	611825	+	611661	611710	Spotted	TTATTGAGAGATATTGAGAAGTTGTTGCAATCTAAAATGCCGCAGGAAGT	491		-	10	10	0	0	1	3	0	3	0	187	99	19	2	0	305.679	263	141.758	rhlE	putative ATP-dependent RNA helicase rhlE (RefSeq)	513	LKJ	Superfamily II DNA and RNA helicases	GO:0003676,GO:0005524,GO:0008026
CBU_0671	221701	NP_819701.1	29654009	7195	612249	613682	+	613609	613658	Spotted	AATATTTGGGTGAGGATGATATTGTGCGATTTGATGATGCTTACGGTCGC	492		-	10	10	0	0	0	0	3	7	0	159	103	37	11	3	374.943	326	195.625	rfbA	mannose-1-phosphate guanylyltransferase/mannose-6-phosphate isomerase (NCBI)	836	M	Mannose-1-phosphate guanylyltransferase	GO:0009103,GO:0008928	2.7.7.22,5.3.1.8	Mannose-1-phosphate guanylyltransferase (GDP).,Mannose-6-phosphate isomerase.
CBU_0672	221702	NP_819702.1	29654010	7195	615284	613668	-	613708	613759	Spotted	CAGCATTCATAAATTCAGATTCCTATAAGCGTTTCGTAGAATCTTACGAAGG	493		-	10	10	0	0	0	0	0	0	0	10	10	10	3	0	673.1	594	127.699	CBU_0672	hypothetical protein (NCBI)
CBU_0673	221703	NP_819703.1	29654011	7195	615822	615277	-	615277	615326	Spotted	AAGATCTCTCGCAGGGAGTTGAAATTATCTTAAGAGAAGAGAATGCGTAG	494	101	operon	10	10	1	5	0	0	0	0	0	41	25	13	9	2	424.268	275	273.469	CBU_0673	histidine biosynthesis bifunctional protein hisB (NCBI)	241	E	Histidinol phosphatase and related phosphatases	GO:0000105,GO:0004401	3.1.3.-
CBU_0674	221704	NP_819704.2	215919016	7195	616406	615816	-	615884	615933	Spotted	TATTATTCCGTCCGTTGATGATAAACATATTACTCCGCATGCCGAAGCCT	494	101	operon	10	9	0	8	0	0	3	0	1	28	17	15	12	6	546.536	580.5	344.968	CBU_0674	SIS domain protein (RefSeq)	279	G	Phosphoheptose isomerase		5.-.-.-
CBU_0675	221705	NP_819705.1	29654013	7195	617153	616410	-	616410	616459	Spotted	ATGCACAAGCCTCTCGTTATTCAATTCATTGTAGTTCGGCCGTGTTATAA	494	101	operon	10	10	0	3	0	0	1	1	0	104	67	22	12	3	374.827	307	218.567	CBU_0675	transaldolase (NCBI)	176	G	Transaldolase	GO:0008152,GO:0004801	2.2.1.2	Transaldolase.
CBU_0676	221706	NP_819706.1	29654014	7195	617333	618346	+	618297	618346	Spotted	ACAATCGTTATTTCAACGTGCGTTGTATTAAAGCATTGGAAGTGGTTTGA	495	102	operon	10	10	0	6	0	0	0	0	1	48	37	15	9	7	458.604	363	266.483	CBU_0676	NAD dependent epimerase/dehydratase (NCBI)	451	MG	Nucleoside-diphosphate-sugar epimerases	GO:0044237,GO:0003824,GO:0050662
CBU_0677	221707	NP_819707.2	215919017	7195	618343	619380	+	619218	619267	Spotted	CTTTGCTGATGGTGTTAGTCGTATGATGAGTGAAATTGGTGTCTGGCATG	495	102	operon	10	10	0	5	0	0	6	4	1	123	62	26	15	12	361.537	253	251.64	CBU_0677	NAD dependent epimerase/dehydratase family (RefSeq)	1087	M	UDP-glucose 4-epimerase	GO:0044237,GO:0003978,GO:0050662	5.1.3.2	UDP-glucose 4-epimerase.
CBU_0678	221708	NP_819708.1	29654016	7195	619355	620935	+	620876	620925	Spotted	ACGTGTTTGGATTCGTCGGATTTCCAATCGATAAAAGAAAATGAGACGCT	495	102	operon	10	9	0	8	0	0	3	0	1	37	27	16	11	8	512.622	380	312.769	CBU_0678	ADP-heptose synthase, putative (NCBI)	2870	M	ADP-heptose synthase, bifunctional sugar kinase/adenylyltransferase	GO:0009058,GO:0016779	2.7.1.-,2.7.-.-	,
CBU_0679	221709	NP_819709.1	29654017	7195	620938	621882	+	621799	621848	Spotted	GAAAAGGACATTTGGATATATGATCAATTAAATGGCTTGACGCAAGCGGC	495	102	operon	10	10	0	8	0	0	0	0	0	29	11	10	9	7	429.069	193	349.391	CBU_0679	oxidoreductase, Gfo/Idh/MocA family (NCBI)	673	R	Predicted dehydrogenases and related proteins	GO:0006118,GO:0016491
CBU_0680	221710	NP_819710.1	29654018	7195	621867	623177	+	623103	623152	Spotted	CAGGCAGGATTTTATGTTCATACGTTGGGAGTTAATTCGAACGCCCTAAA	495	102	operon	10	9	0	6	0	0	4	0	1	20	15	13	11	8	646.9	846.5	338.366	CBU_0680	UDP-glucose/GDP-mannose dehydrogenase family protein (NCBI)	1004	M	Predicted UDP-glucose 6-dehydrogenase	GO:0006118,GO:0003979,GO:0051287	1.1.1.22	UDP-glucose 6-dehydrogenase.
CBU_0681	221711	NP_819711.1	29654019	7195	623170	624075	+	623760	623811	Spotted	TGATCATGTTTATATTGACGACGTTGCTGAAATAATTACTCGAGTGATTCAG	495	102	operon	10	10	0	7	0	0	0	0	0	38	16	11	9	6	404.026	235	312.809	CBU_0681	hypothetical protein (NCBI)	451	MG	Nucleoside-diphosphate-sugar epimerases	GO:0044237,GO:0003824,GO:0050662
CBU_0682	221712	NP_819712.1	29654020	7195	624078	624731	+	624561	624610	Spotted	GTTTCTGGTGGTAAGGCGTATATTCAAGTAGATAGTTACCACACTCCAGA	495	102	operon	10	10	0	6	0	0	0	0	0	32	23	12	9	6	485.938	375	300.384	CBU_0682	hypothetical protein (NCBI)				GO:0008152,GO:0008168
CBU_0683	221713	NP_819713.1	29654021	7195	625990	624728	-	624883	624932	Spotted	TCAGATAACGGATATATTACCAACAATAACTGAACTGCATAAAAGTGCGG	496		-	0	0	0	0	0	0	0	0	0	35	5	0	0	0	198.657	182	49.6843	CBU_0683	methyltransferase, FkbM family (NCBI)
CBU_0684	221714	NP_819714.1	29654022	7195	626329	627747	+	627606	627657	Spotted	ATTCTATTATGCCATCGGTTATGATAGTTCTTACATGCAACAACTAAGCATT	497		-	0	0	0	0	0	0	0	0	0	1	1	0	0	0	371	371	#DIV/0!	CBU_0684	hypothetical protein (NCBI)
CBU_0685	221715	NP_819715.1	29654023	7195	628192	631530	+	631421	631470	Spotted	TTACTCATTACGTTCCGTCCATTCTGAAAACTGTCTTCTTTTCTTTTCGC	498		-	2	2	0	0	0	0	0	0	0	6	4	0	0	0	314.667	256	112.651	CBU_0685	hypothetical protein (NCBI)
CBU_0686	221716	NP_819716.2	215919018	7195	631758	632468	+	631964	632013	Spotted	TGAAGAAAGCTATCGATATATCCAGCAAACGAGGAAAGTTATCGAAGGCA	499		-	4	3	1	1	0	0	1	0	0	18	10	2	2	0	349.833	310	212.882	CBU_0686	pyruvate dehydrogenase (acetyl-transferring) E1 component, alpha/beta fusion protein (RefSeq)				GO:0008152,GO:0004739	1.2.4.1	Pyruvate dehydrogenase (acetyl-transferring).
CBU_0687	221717	NP_819717.1	29654025	7195	632485	634128	+	633867	633918	Spotted	GAATAAAGAAGCTCATTCCGAAACAAGTATTAGCAAATTTGCATTTACACGC	500		-	4	4	0	0	0	0	0	0	0	6	6	1	1	0	460.833	412	174.037	CBU_0687	hypothetical protein (NCBI)
CBU_0688	221718	NP_819718.1	29654026	7195	634508	635506	+	635439	635490	Spotted	CGTATCAGTACTATTTATCGTATGAGAGACAAGCTATTGCAATTGAGGGAAT	501	103	operon	10	10	0	1	0	0	1	2	1	74	57	20	4	1	396.581	343.5	190.779	wcaG	GDP-fucose synthetase (NCBI)	451	MG	Nucleoside-diphosphate-sugar epimerases	GO:0009225,GO:0042351,GO:0050577,GO:0050662	1.1.1.271	GDP-L-fucose synthase.
CBU_0689	221719	NP_819719.1	29654027	7195	635499	636545	+	636415	636465	Spotted	GGCAGCCGAATACTTCTTTCCATAAGCTTATTAAAATTATGCTTGAACATG	501	103	operon	10	10	0	1	0	0	3	8	0	109	76	28	9	3	398.716	341	215.558	gmd	GDP-mannose 4,6-dehydratase (NCBI)	1089	M	GDP-D-mannose dehydratase	GO:0019673,GO:0005622,GO:0008446,GO:0050662	4.2.1.47	GDP-mannose 4,6-dehydratase.
CBU_0690	221720	NP_819720.2	215919019	7195	636554	637411	+	637252	637303	Spotted	TGAGTTACCTTCAACTTACGCAGAAAGGAACACAGGTAACTCTAAAATTATA	501	103	operon	7	6	3	0	0	0	0	0	0	45	19	6	4	0	301.067	224	189.788	CBU_0690	polyprenyl-phosphate beta-D-mannosyltransferase (RefSeq)	463	M	Glycosyltransferases involved in cell wall biogenesis
CBU_0691	221721	NP_819721.2	215919020	7195	637404	638642	+	638432	638481	Spotted	TATTGCTGAAGTCAATCCAGACAAGTTTAATTGTGTTACACCGGGGACAC	502		-	10	10	0	1	0	0	0	1	0	57	28	8	3	0	319.351	249	181.523	CBU_0691	methyltransferase (RefSeq)
CBU_0692	221722	NP_819722.1	29654030	7195	639724	638663	-	639167	639216	Spotted	TTATTGAACATCGATGGCTGCATAATATTCATGTCAATGAAGCTGAAGAC	503	104	operon	10	7	2	4	0	5	9	7	1	48	31	20	18	5	494.5	391.5	312.699	CBU_0692	dehydrogenase, E1 component, beta subunit (NCBI)	22	C	Pyruvate/2-oxoglutarate dehydrogenase complex, dehydrogenase (E1) component, eukaryotic type, beta subunit	GO:0008152,GO:0004739	1.2.4.1	Pyruvate dehydrogenase (acetyl-transferring).
CBU_0693	221723	NP_819723.2	215919021	7195	640770	639721	-	639721	639770	Spotted	AATGGCTAAGACATCAGTTGGATAAACAAAAGGATGAGGTGCTAACTTGA	503	104	operon	10	6	2	4	2	4	10	8	1	88	45	24	19	5	401.057	257	272.458	CBU_0693	putative pyruvate dehydrogenase (acetyl-transferring) E1 component, alpha subunit (RefSeq)	1071	C	Pyruvate/2-oxoglutarate dehydrogenase complex, dehydrogenase (E1) component, eukaryotic type, alpha subunit	GO:0008152,GO:0004739,GO:0016624	1.2.4.1	Pyruvate dehydrogenase (acetyl-transferring).
CBU_0694	221724	NP_819724.1	29654032	7195	642009	640897	-	641062	641111	Spotted	TGACAAGAACCTTTCTCCAAAATACCTTTTCTATCAAACTGCACGGGAAA	504		-	8	8	0	0	0	0	0	0	0	37	18	6	0	0	307.081	248	158.524	CBU_0694	glycosyl transferase, group 2 family protein (NCBI)					2.4.1.-
CBU_0695	221725	NP_819725.1	29654033	7195	643447	642071	-	642193	642244	Spotted	TGTGACATGATTTCAAAGAATCCATCTACTTATGATACACCACTAAACCGTT	505		-	7	7	0	0	0	0	0	0	0	7	7	4	1	0	607.714	662	171.309	CBU_0695	hypothetical protein (NCBI)
CBU_0696	221726	NP_819726.2	215919022	7195	644594	643440	-	643675	643724	Spotted	GTAAAATACCGCGATCAATTATTTCAATACTTGAAAGACAACGGCATTGA	506	105	operon	10	10		2	0	0	0	0	1	66	38	15	2	0	352.273	301.5	186.285	CBU_0696	DegT/DnrJ/EryC1/StrS aminotransferase family protein (RefSeq)	399	M	Predicted pyridoxal phosphate-dependent enzyme apparently involved in regulation of cell wall biogenesis	GO:0003824,GO:0030170
CBU_0697	221727	NP_819727.1	29654035	7195	645785	644625	-	644711	644762	Spotted	GCTCTATCCTTACCCATTTATCCGGAACTTAATCTCAAGCAACAAGATTATA	506	105	operon	10	10	0	2	0	0	0	0	0	75	44	14	3	0	343.92	320	179.049	CBU_0697	pleiotropic regulatory protein (NCBI)	399	M	Predicted pyridoxal phosphate-dependent enzyme apparently involved in regulation of cell wall biogenesis	GO:0003824,GO:0030170
CBU_0698	221728	NP_819728.1	29654036	7195	646977	645808	-	645853	645902	Spotted	AGGAGGAAATCATTTCTAGGGAATTCGACTCAATGTATGCGTTATTAGAG	507		-	5	5	0	0	0	0	0	0	0	7	7	5	1	0	559	598	165.551	CBU_0698	hypothetical protein (NCBI)
CBU_0699	221729	NP_819729.1	29654037	7195	647180	648739	+	648642	648691	Spotted	TGGAAGAGTTAGAAGATGGTTATTTAACTATAGAGCCGCCACTTATGAGG	508		-	4	4	0	0	0	0	0	0	0	7	7	2	0	0	428.857	469	126.856	CBU_0699	hypothetical protein (NCBI)
CBU_0700	221730	NP_819730.2	215919023	7195	650532	648775	-	648784	648833	Spotted	GATATTTGACGCCTAAAGTAGACAGGGTGAGGAATTCAGTTCTGAGCGTC	509	106	operon	10	10	0	0	0	0	0	2	0	77	36	6	1	0	284.948	248	139.945	CBU_0700	sulfate adenylyltransferase/adenylylsulfate kinase (RefSeq)	2046	P	ATP sulfurylase (sulfate adenylyltransferase)	GO:0000103,GO:0009336,GO:0004020,GO:0004781,GO:0005524	2.7.1.25,2.7.7.4	Adenylyl-sulfate kinase.,Sulfate adenylyltransferase.
CBU_0701	221731	NP_819731.2	215919024	7195	651347	650514	-	650675	650724	Spotted	GTTAGCAGAAGGGGAAGTAGACATCTACCCGAGATTAGGTCCTACGAAAG	509	106	operon	6	6	0	0	0	0	0	0	0	59	22	4	1	0	272.898	222	134.963	cysQ-2	3'(2'),5'-bisphosphate nucleotidase (RefSeq)	1218	P	3'-Phosphoadenosine 5'-phosphosulfate (PAPS) 3'-phosphatase	GO:0004437,GO:0008441	3.1.3.7,3.1.3.25	3'(2'),5'-bisphosphate nucleotidase.,Inositol-phosphate phosphatase.
CBU_0702	221732	NP_819732.1	29654040	7195	651484	652233	+	651836	651885	Spotted	AACTGATACCCAAAATGGTGGATCGTCAAAGCGGTGTGATTATTCATGTG	510	107	operon	10	5	0	2	0	0	7	0	1	29	14	10	9	2	432.828	224	313.676	CBU_0702	oxidoreductase, short-chain dehydrogenase/reductase family (NCBI)	300	R	Short-chain dehydrogenases of various substrate specificities	GO:0008152,GO:0004316,GO:0016491	1.1.1.100	3-oxoacyl-[acyl-carrier-protein] reductase.
CBU_0703	221733	NP_819733.1	29654041	7195	652243	653106	+	653037	653088	Spotted	TGTGGTCGGTTGGACATTTACGATGGTTTATTTAGGACGAAATTATAATAAA	510	107	operon	9	9	0	1	0	0	1	2	0	34	22	9	3	1	384.176	323	211.645	CBU_0703	lipopolysaccharide/O-antigen ABC transporter, permease protein, putative (NCBI)	1682	GM	ABC-type polysaccharide/polyol phosphate export systems, permease component
CBU_0704	221734	NP_819734.1	29654042	7195	653116	653892	+	653776	653825	Spotted	AAAGCGATATTATTGGAGCATGGTAGTATCAAAGCTTTTGGCGATGTTGA	510	107	operon	10	10	0	1	0	0	1	4	0	63	36	13	3	1	355.079	313	195.308	rfbI	lipopolysaccharide/O-antigen ABC transporter, ATP-binding protein (NCBI)	1134	GM	ABC-type polysaccharide/polyol phosphate transport system, ATPase component	GO:0005524,GO:0016887
CBU_0705	221735	NP_819735.1	29654043	7195	654933	654604	-	654679	654728	Spotted	TTAACGATGCTGAACCACTATTATCCCCTGAACAAGCCAAACATTATCGG	511		-	2	2	0	0	0	0	0	0	0	2	2	2	1	0	671.5	671.5	188.798	CBU_0705	hypothetical protein (NCBI)
CBU_0706	221736	NP_819736.1	29654044	7195	655660	654950	-	654950	654999	Spotted	AAGAGACGACTATCAAATTTCTAAATCCCTCCTCACAAGTGATGCTTTAA	512		-	2	2	0	0	0	0	0	0	0	2	2	2	1	0	691	691	161.22	CBU_0706	hypothetical protein (NCBI)
CBU_0707	221737	NP_819737.1	29654045	7195	656064	655774	-	655900	655949	Spotted	TATTTTCAGAAGCGATGGATCTGCATCCTATCGTGATTATTCTGTCCATA	513		-	2	2	0	0	0	0	0	0	0	4	2	2	0	0	363.25	359	225.044	CBU_0707	permease-like protein (NCBI)
CBU_0707a	5437838			7195	656111	656512	+					514		-	0	0	0	0	0	0	0	0	0									CBU_0707a
CBU_0709	221738			7195	657486	656654	-	656654	656703	Spotted	AACAAGAGAAAGAAGAACAAGAATATAAAGCGCTTGGTTGCTACCGGTAA	515		-	2	2	1	0	0	0	0	0	0	2	2	1	1	1	688	688	388.909	CBU_0709	hypothetical protein (RefSeq)
CBU_0710					657253	657302		657253	657302	Spotted	GCGGCGTTATTACCGTTTTCAAACAAAAGAAAGGAAATGTTACACATTAG	516		-	2	2	1	0	0	0	0	0	0	2	2	1	1	1	696.5	696.5	376.888
CBU_0711	221740	NP_819740.1	29654048	7195	657937	657794	-	657803	657852	Spotted	ATTACTTGAAAAGAATTCCGGGACCTTCGTTAACAAAGAAGCTTGGCAAC	517		-	2	2	0	0	0	0	0	0	0	2	2	0	0	0	421.5	421.5	12.0208	CBU_0711	hypothetical protein (NCBI)
CBU_0712	221741	NP_819741.1	29654049	7195	659564	658929	-	659076	659125	Spotted	ATAGTATTTCTGATCGTGAGATGGAAATCCTTTTAATGATGGTGCGAGGA	518		-	5	5	0	0	0	0	0	0	0	45	13	2	0	0	248.689	206	124.477	CBU_0712	DNA-binding response regulator, GacA family (NCBI)	2197	TK	Response regulator containing a CheY-like receiver domain and an HTH DNA-binding domain	GO:0006355,GO:0000160,GO:0005622,GO:0000156,GO:0043565,GO:0003700
CBU_0713	221742	NP_819742.2	215919025	7195	660873	659623	-	659623	659673	Spotted	ACTTTGTTATTACCGGAAATGAAAGGTAAAGCCATTGATGTGATCGAATAA	519		-	3	3	0	0	0	0	0	0	0	32	12	3	1	0	260.562	202.5	162.799	CBU_0713	phosphate transporter (RefSeq)	2223	P	Nitrate/nitrite transporter	GO:0006810,GO:0016021,GO:0005215
CBU_0714	221743	NP_819743.2	215919026	7195	661333	660923	-	660959	661008	Spotted	CGGCCGAATATTTATTATCTAAGCCTCAATTGGCAGACTATCTCGAGGCG	520		-	7	5	0	2	0	0	0	0	0	27	14	5	1	0	316.222	254	187.647	CBU_0714	hypothetical protein (RefSeq)
CBU_0715	221744	NP_819744.1	29654052	7195	661506	662498	+	662444	662493	Spotted	ATTTAAAACCCCTTATCAGGTCTTCCTTAAGCGAACTGGTGCAATTCCTC	521		-	3	3	0	0	0	0	0	0	0	3	3	2	0	0	560	601	71.0141	CBU_0715	transposase, IS30 family (NCBI)	2826	L	Transposase and inactivated derivatives, IS30 family	GO:0006310,GO:0015074,GO:0003677
CBU_0716	221745	NP_819745.1	29654053	7195	663477	662557	-	662705	662755	Spotted	CGCTGATCTGGGTTGTTCTTATAACGAGGAAAATTTATTACACGTTAATGA	522		-	3	3	0	0	0	0	0	0	0	27	10	0	0	0	244.296	224	99.0943	CBU_0716	pyridine nucleotide-disulfide oxidoreductase (NCBI)	492	O	Thioredoxin reductase	GO:0006118,GO:0006725,GO:0004497
CBU_0716a	5437839			7195	663625	665294	+					523		-	0	0	0	0	0	0	0	0	0									CBU_0716a
CBU_0718	221746	NP_819746.1	29654054	7195	665529	665813	+	665673	665722	Spotted	AACTTTGTCAATCGAGGAAAGGATGTCATTCATTCAGTAGAAAGCAAATG	524	108	operon	1	1	0	0	0	0	0	0	0	2	2	1	1	0	576	576	414.365	CBU_0718	hypothetical protein (NCBI)
CBU_0719	221747	NP_819747.1	29654055	7195	665810	666235	+	666066	666115	Spotted	CAATAATTAGTAAGCATTTTGGTAAAAGTATTTTGGGAATCGGCGCCGCT	524	108	operon	1	1	0	0	0	0	0	0	0	2	2	1	1	0	576	576	414.365	CBU_0719	hypothetical protein (NCBI)
CBU_0720	221748	NP_819748.1	29654056	7195	667172	666291	-	666346	666395	Spotted	GTAGGCGCTGATATTAATGAATTAGCACCTATCCCTGGATTCCACAGTTG	525	109	operon	10	9	0	0	0	0	2	1	0	77	42	9	3	2	324.519	260	179.066	CBU_0720	agmatinase, putative (NCBI)	10	E	Arginase/agmatinase/formimionoglutamate hydrolase, arginase family	GO:0006596,GO:0008783,GO:0046872	3.5.3.11	Agmatinase.
CBU_0721	221749	NP_819749.2	215919027	7195	668233	667172	-	667172	667221	Spotted	ATCGTTCGCCTCGACAGTACGCGAATTTATTTAAATCGGAATCAAAATAA	525	109	operon	10	10	0	1	0	0	0	0	0	44	23	5	2	2	318.364	254	179.181	CBU_0721	deoxyhypusine synthase (RefSeq)	1899	O	Deoxyhypusine synthase	GO:0008612,GO:0050983,GO:0004171	2.5.1.46	Deoxyhypusine synthase.
CBU_0722	221750	NP_819750.2	215919028	7195	669459	668257	-	668262	668311	Spotted	CATGTATTCGGATGAATATATTACCCACGAACCGCTTGAAGTCATCGCTG	525	109	operon	8	7	1	2	0	0	3	1	0	61	28	6	5	3	303.164	236	206.725	CBU_0722	putative decarboxylase, pyridoxal-dependent (RefSeq)	19	E	Diaminopimelate decarboxylase	GO:0006596,GO:0003824,GO:0004586	4.1.1.17	Ornithine decarboxylase.
CBU_0723					669570	669609		669570	669609	Spotted	CGCCAGTAATAAAGACCCAAAATTTTAAAGCCCGCCATGC	526		-	3	3	0	0	0	0	0	0	0	3	3	3	0	0	598.667	575	40.9919
CBU_0724	221752	NP_819752.1	29654060	7195	670697	669705	-					527		-	0	0	0	0	0	0	0	0	0									CBU_0724	transposase, IS30 family (NCBI)	2826	L	Transposase and inactivated derivatives, IS30 family	GO:0006310,GO:0015074,GO:0003677
CBU_0724a	5437840			7195	671952	670899	-					528		-	0	0	0	0	0	0	0	0	0									CBU_0724a
CBU_0724c	5437841	YP_002332974.1	215919029	7195	672070	672005	-					529		-	0	0	0	0	0	0	0	0	0									CBU_0724c	hypothetical protein (RefSeq)
CBU_0727	221753	NP_819753.1	29654061	7195	672203	673336	+	673047	673098	Spotted	GGACGTTTGGGAGTATGATAATGGCTAAATCTCAATTGGATATTGGATATTT	530	110	operon	10	10	0	3	0	0	0	0	0	133	93	20	3	2	350.549	340	159.6	CBU_0727	hypothetical protein (NCBI)	767	Q	ABC-type transport system involved in resistance to organic solvents, permease component
CBU_0728	221754	NP_819754.2	215919030	7195	673333	674142	+	674093	674142	Spotted	CGTTTCGTGATAAACTTGAACGAGGGGTTAAGGATGGATACAAAAGTTAA	530	110	operon	6	6	0	3	0	0	0	0	0	68	18	4	3	2	258.632	199.5	171.902	CBU_0728	ABC transporter ATP-binding protein (RefSeq)	1127	Q	ABC-type transport system involved in resistance to organic solvents, ATPase component	GO:0005524,GO:0016887
CBU_0729	221755	NP_819755.1	29654063	7195	674126	675052	+	674979	675028	Spotted	TTGAGTTACAGCATAATCCATCGATGTTGGTCCGAGGTAAATATCCTCCG	530	110	operon	10	10	0	3	0	0	0	0	0	79	45	9	3	3	325.481	267	176.329	CBU_0729	hypothetical protein (NCBI)	1463	Q	ABC-type transport system involved in resistance to organic solvents, periplasmic component
CBU_0730	221756	NP_819756.1	29654064	7195	675055	675654	+	675397	675446	Spotted	GGAATGACTCATTACCGTCTTGATACACGTTTACTGAAATTGCAGCAAGA	530	110	operon	6	5	0	4	0	0	0	0	0	38	14	4	3	1	285.474	194	208.547	CBU_0730	hypothetical protein (NCBI)	3218	R	ABC-type uncharacterized transport system, auxiliary component
CBU_0731	221757	NP_819757.2	215919031	7195	676121	675651	-	675666	675715	Spotted	ATTATATTTGCGGATCTCCTAAACAAACGCTGGATACCTGTCAATTTGAG	531		-	2	2	0	0	0	0	0	0	0	4	4	1	0	0	428.25	434.5	98.7265	CBU_0731	hypothetical protein (RefSeq)
CBU_0732	221758			7195	677149	676224	-	676260	676311	Spotted	GCGTCATTTATGGAGAAGCGATCTGTGGAAGCGTTATAATAAAGTAATTAAA	532		-	4	4	1	0	0	0	0	0	0	4	4	3	1	1	633.5	555.5	220.899	CBU_0732	hypothetical protein (RefSeq)
CBU_0733					676715	676766		676715	676766	Spotted	TAAAACACCCCATAACACACTAGCCCTTTCTCAAAATACGTTTAATTTCACG	533		-	4	4	1	0	0	0	0	0	0	4	4	2	1	1	644.25	564	217.809
CBU_0734	221760	NP_819760.1	29654068	7195	677433	677209	-	677298	677327	Spotted	CGAAGAGACGCGCAGGCAGAAGTCCAGGCG	534		-	3	3	0	0	0	0	0	0	0	4	4	3	0	0	566	606	131.479	CBU_0734	hypothetical protein (NCBI)
CBU_0735	221761	NP_819761.1	29654069	7195	677415	678263	+	678146	678195	Spotted	AACGCCCGTAGACAATAATCAAGAACGCATTAATAAAGCTATCCAGCGAG	535		-	10	6	0	1	0	0	6	4	0	83	43	11	7	3	322.759	260	207.584	CBU_0735	phosphorylase family protein (NCBI)	2820	F	Uridine phosphorylase	GO:0009116,GO:0003824,GO:0004850	2.4.2.3	Uridine phosphorylase.
CBU_0736	221762	NP_819762.1	29654070	7195	678937	678284	-	678315	678364	Spotted	GGTGATACGGTGATTACTTATTTTCCTCAAAACAGTTTTCAAGGAAAGGG	536		-	2	2	0	0	0	0	0	0	0	6	6	0	0	0	385	370.5	70.7672	CBU_0736	hypothetical protein (NCBI)
CBU_0737	221763	NP_819763.1	29654071	7195	679226	680554	+	680484	680533	Spotted	TAATGAGTGAACTTGAAGTGAAAGATCAAGCGATTCCCTACGAAGAGGCG	537	111	operon	10	8	0	1	3	4	0	7	0	312	191	60	16	3	352.003	300	184.408	tig	trigger factor (NCBI)	544	O	FKBP-type peptidyl-prolyl cis-trans isomerase (trigger factor)	GO:0006457,GO:0015031,GO:0003755,GO:0030051,GO:0004600,GO:0042027	5.2.1.8	Peptidylprolyl isomerase.
CBU_0738	221764	NP_819764.1	29654072	7195	680564	681151	+	681102	681151	Spotted	AAGCGGTGGAATATGGTTTAATCGATTCTATATTTAAAGAACGCCCCTAG	537	111	operon	10	8	0	1	7	5	0	10	0	271	151	43	12	3	338.675	283	186.523	clpP	ATP-dependent Clp protease, proteolytic subunit ClpP (NCBI)	740	OU	Protease subunit of ATP-dependent Clp proteases	GO:0006508,GO:0008462	3.4.21.92	Endopeptidase Clp.
CBU_0739	221765	NP_819765.1	29654073	7195	681206	682474	+	682224	682273	Spotted	AAGGTGTGGAAATAGATTTCCGAGAAGATGCGTTAAAGGCAATTGCAAAG	537	111	operon	10	8	0	1	4	6	0	8	0	231	125	44	10	6	339.186	257	196.285	clpX	ATP-dependent protease ATP-binding subunit (NCBI)	1219	O	ATP-dependent protease Clp, ATPase subunit	GO:0019538,GO:0015031,GO:0005524,GO:0008270,GO:0046983,GO:0016887
CBU_0740	221766	NP_819766.1	29654074	7195	682488	684941	+	684877	684926	Spotted	AGCCACCGATGAAAACATCATCCAATAAATTACGTAAAGAGGATCGGGAT	537	111	operon	10	8	0	0	6	3	0	4	0	225	130	38	9	4	336.138	282	179.844	lon	ATP-dependent protease La (NCBI)	466	O	ATP-dependent Lon protease, bacterial type	GO:0006510,GO:0004176,GO:0017111,GO:0005524,GO:0008846	3.4.21.53	Endopeptidase La.
CBU_0741	221767	NP_819767.1	29654075	7195	684950	686272	+	686211	686260	Spotted	CTCGCGGCAACATTAAAACGGGTTCCATATTGATAGAACAAATGACCGTT	537	111	operon	10	10	1	1	0	0	0	1	1	122	66	15	3	1	313.459	268	155.652	pmbA	PmbA protein (NCBI)	312	R	Predicted Zn-dependent proteases and their inactivated homologs
CBU_0742	221768	NP_819768.1	29654076	7195	686356	686502	+	686361	686390	Spotted	GACACGCCGTGAACTCGTCCCTGAGGGCTC	538		-	5	5	0	0	0	0	0	0	0	6	6	3	0	0	498.667	516.5	127.89	CBU_0742	hypothetical protein (NCBI)
CBU_0743	221769	NP_819769.1	29654077	7195	686768	686499	-	686499	686548	Spotted	TGGAAGCCATCGAAAAGTTAATTAATGATAAATTCGGCGAAGAAGCTTAG	539	112	operon	10	10	1	2	0	0	0	2	0	139	80	25	4	3	350.899	297	181.798	ptsH	phosphocarrier protein HPr (NCBI)	1925	G	Phosphotransferase system, HPr-related proteins	GO:0009401,GO:0005351
CBU_0744	221770	NP_819770.1	29654078	7195	687327	686749	-	686840	686889	Spotted	CATCCAGGAAGGAATTTACCTTTACTTATTGAAACATTGGTACGCAACCA	539	112	operon	10	10	0	1	0	0	0	2	0	104	65	29	3	2	377.279	309.5	201.49	CBU_0744	HPr kinase/phosphorylase (NCBI)				GO:0000160,GO:0006109,GO:0000155,GO:0005524	2.7.11.-,2.7.4.-	,
CBU_0745	221771	NP_819771.1	29654079	7195	687617	687327	-	687486	687537	Spotted	ACAACCTTGTCGCGATGAAATTTCTAATATCCACATCATCTTCCATATTAAT	539	112	operon	10	10	0	0	0	0	0	0	0	59	34	11	3	2	346.271	267	200.291	CBU_0745	ribosomal subunit interface protein (NCBI)	1544	J	Ribosome-associated protein Y (PSrp-1)
CBU_0746	221772	NP_819772.1	29654080	7195	688465	687716	-	687848	687897	Spotted	TTTTGATTACCGATCATAATGTTCGAGAAACCCTTGATATTTGCCAACGC	540	113	operon	10	8	0	3	1	0	0	4	0	148	61	16	4	3	287.797	228	167.798	CBU_0746	ABC transporter, ATP-binding protein (NCBI)	1137	R	ABC-type (unclassified) transport system, ATPase component	GO:0005524,GO:0016887	3.6.3.-
CBU_0747	221773	NP_819773.2	215919032	7195	688896	688468	-	688711	688760	Spotted	TCGTCTATCATAATCCGACCACTAATCGAATCGTACGATTGAAAGCCATT	540	113	operon	10	9	0	2	1	0	0	4	0	50	28	14	4	0	350.76	263.5	216.564	CBU_0747	cell envelope biogenesis protein YhbN (RefSeq)	1934	S	Uncharacterized protein conserved in bacteria
CBU_0748	221774	NP_819774.1	29654082	7195	689533	688946	-	689050	689099	Spotted	TAAAACAAACGATCCCGTCACTATTACCCGACCTAACGCAGTCATAAAAG	540	113	operon	10	10	0	1	0	0	0	0	0	46	23	9	4	3	348.239	253	228.461	CBU_0748	hypothetical protein (NCBI)	3117	S	Uncharacterized protein conserved in bacteria
CBU_0749	221775	NP_819775.1	29654083	7195	690046	689549	-	689851	689900	Spotted	GATCAAACAGTTGTTAAAGGCGGGTATTGAAGTGGCAATTATAAGCAGCC	540	113	operon	10	10	1	2	4	0	2	4	0	101	68	33	8	5	413.04	344	227.917	CBU_0749	hydrolase, HAD-superfamily, subfamily IIIA (NCBI)	1778	R	Low specificity phosphatase (HAD superfamily)	GO:0009103,GO:0000287,GO:0019143	3.1.3.45,3.1.3.-	3-deoxy-manno-octulosonate-8-phosphatase.,
CBU_0750	221776	NP_819776.1	29654084	7195	691022	690048	-	690107	690156	Spotted	CAAAATGATGCAGCAGAATAAGATTACTTCGCTTGTGGTCGTGGATACCG	540	113	operon	10	10	0	4	0	0	0	5	0	167	99	44	6	5	370.383	308	201.301	CBU_0750	KpsF/GutQ family protein (NCBI)	794	M	Predicted sugar phosphate isomerase involved in capsule formation	GO:0005975,GO:0005529,GO:0019146	5.3.1.13	Arabinose-5-phosphate isomerase.
CBU_0751	221777	NP_819777.1	29654085	7195	691173	692477	+	692336	692385	Spotted	TACCATTGTCGATCGAATTTATCACATTGATCGCGGGTATGAATGTATTG	541		-	10	9	0	5	1	0	4	3	0	246	167	63	11	3	391.301	349.5	197.443	murA	UDP-N-acetylglucosamine 1-carboxyvinyltransferase (NCBI)	766	M	UDP-N-acetylglucosamine enolpyruvyl transferase	GO:0019277,GO:0008760	2.5.1.7	UDP-N-acetylglucosamine 1-carboxyvinyltransferase.
CBU_0752	221778	NP_819778.2	215919033	7195	692468	693409	+	693327	693378	Spotted	CTGGGAATCATTTATTGCATGTAGGGAAATTTAAGGAAGATTTTACGCATTT	542		-	5	5	0	0	0	0	0	0	0	9	9	6	0	0	503.111	516	117.712	CBU_0752	esterase family protein (RefSeq)
CBU_0752a	5437842	YP_002332975.1	215919034	7195	693440	693622	+					543		-	0	0	0	0	0	0	0	0	0									CBU_0752a	hypothetical protein (RefSeq)
CBU_0753	221779	NP_819779.1	29654087	7195	696788	693720	-	693720	693769	Spotted	TCCTAAAACGCTTTAAAACGACGGACGAAATGTCATTGTCAGGGAAATGA	544		-	6	6	0	3	0	0	0	3	0	44	12	4	3	2	272.773	195	202.018	CBU_0753	transporter, AcrB/AcrD/AcrF family (NCBI)	841	V	Cation/multidrug efflux pump
CBU_0754	221780	NP_819780.1	29654088	7195	697882	696836	-	696838	696889	Spotted	ACTGGACAAGATCAAATTTATAAAAGTGGAGCAAAGGTAAAAGTGGTTCATT	545	114	operon	10	10	0	5	0	0	0	0	0	43	18	7	5	1	306.558	201	226.941	CBU_0754	efflux transporter, RND family, MFP subunit (NCBI)	845	M	Membrane-fusion protein	GO:0009306,GO:0016020,GO:0008565
CBU_0755	221781	NP_819781.1	29654089	7195	699237	697882	-	698272	698321	Spotted	AATCTGTCAACGGTATTCGGATTCATAGTTCAGCACAACTCCACAACATG	545	114	operon	10	9	0	0	0	0	0	1	0	247	140	27	2	0	311.769	272	139.454	htrA	protease DO (NCBI)	265	O	Trypsin-like serine proteases, typically periplasmic, contain C-terminal PDZ domain	GO:0006508,GO:0004252,GO:0005515	3.4.21.-,3.4.21.107	,Peptidase Do.
CBU_0756	221782	NP_819782.2	215919035	7195	700036	699398	-	699478	699527	Spotted	AGGCGTTTCCCACATTTATGGCGGAAAATTCTGTACCTATCAGGATAAAA	546	115	operon	10	10	0	0	0	0	0	3	0	160	98	22	4	1	337.675	295.5	159.87	CBU_0756	hypothetical protein (RefSeq)	1496	S	Uncharacterized conserved protein
CBU_0757	2210009	YP_338280.2	215919036	7195	701060	700077	-	700658	700707	Spotted	GACATTAATTAACGCTTTATTGCATTATGACCCGAGCTTAAGCGTGGTGC	546	115	operon	10	8	0	3	0	1	0	4	0	218	124	30	7	1	324.826	273	160.745	rluD	ribosomal large subunit pseudouridine synthase D (RefSeq)	564	J	Pseudouridylate synthases, 23S RNA-specific	GO:0001522,GO:0003723,GO:0016439	5.4.99.12,4.2.1.70	tRNA-pseudouridine synthase I.,Pseudouridylate synthase.
CBU_0758	221783	NP_819783.2	215919037	7195	701120	701938	+	701864	701913	Spotted	GCTGATGCGAGTAATCACTTATTACAAACAAATTATCCTCATACGCTGGA	547		-	10	7	0	3	0	0	0	2	0	130	80	15	3	1	320.562	292.5	152.681	CBU_0758	competence lipoprotein ComL (RefSeq)	4105	R	DNA uptake lipoprotein
CBU_0759	2210010			7195	703090	702144	-					548		-	0	0	0	0	0	0	0	0	0									CBU_0759
CBU_0760	221784	NP_819784.1	29654092	7195	703546	703172	-	703262	703311	Spotted	GTAGCACACCCATTATTGCTTTAACTTCAGAGAGTAGTAAGAACAAACCC	549		-	10	4	4	7	0	0	0	0	3	27	17	7	2	1	371.889	283	227.681	CBU_0760	response regulator protein, putative (NCBI)				GO:0000160,GO:0006355,GO:0000156
CBU_0761	221785	NP_819785.1	29654093	7195	703762	703872	+	703785	703827	Spotted	CAAAAGTGGAGGAGACGGCTATGAAGCGTTTGAAGGAAGAACG	550		-	3	3	0	0	0	0	0	0	0	3	3	3	1	0	687.667	608	157.424	CBU_0761	hypothetical protein (NCBI)
CBU_0762	221786	NP_819786.1	29654094	7195	703865	704491	+	704392	704441	Spotted	AACAGCGTCTAAGCCTTTCCTCTATAATATTGAATTAGTGAACGCAGCGC	551		-	3	3	0	0	0	0	0	0	0	3	3	3	1	0	687.667	608	157.424	CBU_0762	hypothetical protein (NCBI)				GO:0003677
CBU_0763	221787	NP_819787.2	215919038	7195	704512	705102	+	704957	705006	Spotted	GTTGGTGGTTTAAGCTCGATTGGTTATTAGTGCTATTAATGGGACCGCTC	552		-	3	3	0	0	0	0	0	0	0	3	3	2	0	0	547.667	608	104.5	CBU_0763	hypothetical membrane spanning protein (RefSeq)
CBU_0764	2210011			7195	705123	707557	+					553	116	operon	0	0	0	0	0	0	0	0	0									CBU_0764
CBU_0765	2210012			7195	707557	709219	+					553	116	operon	0	0	0	0	0	0	0	0	0									CBU_0765
CBU_0766	221788	NP_819788.1	29654096	7195	711285	709333	-	709333	709382	Spotted	AAAACCCCAAAATACTAGAATATTTCCAGAATCTCAAAGAATTGGGGTGA	554		-	10	7	0	0	1	0	10	4	0	109	59	24	16	7	370.569	260	251.044	CBU_0766	acetoacetyl-CoA synthase (NCBI)	365	I	Acyl-coenzyme A synthetases/AMP-(fatty) acid ligases	GO:0008152,GO:0003987,GO:0016405,GO:0030729	6.2.1.1,6.2.1.16	Acetate--CoA ligase.,Acetoacetate--CoA ligase.
CBU_0767	221789	NP_819789.1	29654097	7195	711583	711714	+	711630	711679	Spotted	TTGGACGTCAGAATTGCCGATCATAGTAAAGATGAATGATCTTCCTAAAG	555		-	1	1	0	0	0	0	0	0	0	1	1	0	0	0	455	455	#DIV/0!	CBU_0767	hypothetical protein (NCBI)
CBU_0768	221790	NP_819790.2	215919039	7195	712126	713661	+	713607	713658	Spotted	CCTTGGAGGAAATATCTTGCGTATTATGGGATATTTCTCTTCATGTTCAAAT	556		-	1	1	0	0	0	0	0	0	0	23	6	1	0	0	246.174	216	96.5762	CBU_0768	multidrug resistance protein B (RefSeq)				GO:0006508,GO:0006810,GO:0016021,GO:0004237,GO:0008239,GO:0005215
CBU_0769	221791	NP_819791.1	29654099	7195	713761	714447	+	714272	714321	Spotted	GATTCCAATTTCATATGGAGCTGACTTTGTCGGTAATTGAAGAGATGATT	557		-	10	10	0	0	0	0	0	0	0	76	37	4	0	0	288.145	244.5	123.58	CBU_0769	glutamine amidotransferase, class I (NCBI)	518	F	GMP synthase - Glutamine amidotransferase domain	GO:0006541,GO:0003824,GO:0003922
CBU_0770	221792	NP_819792.2	215919040	7195	714614	715879	+	715828	715879	Spotted	GCTAATACCATTGGATCGGTATGTGGATGCTGTTCCAATTACTTTAATTTAG	558		-	4	4	0	0	0	0	0	0	0	33	22	3	0	0	303.545	319	99.3382	CBU_0770	hypothetical ATPase (RefSeq)	1373	R	Predicted ATPase (AAA+ superfamily)
CBU_0771	221793	NP_819793.1	29654101	7195	716051	716923	+	716840	716891	Spotted	CGCGAAGCATTGTATGAAGTCCTAAATTATCATGCCTACGAAGATAAATTAA	559	117	operon	10	8	0	2	0	0	3	5	0	65	33	19	6	2	365.262	260	230.907	prpB	methylisocitrate lyase (NCBI)	2513	G	PEP phosphonomutase and related enzymes	GO:0008152,GO:0046421	4.1.3.30	Methylisocitrate lyase.
CBU_0772	221794	NP_819794.1	29654102	7195	716916	718034	+	717937	717986	Spotted	TCTTTGAACAACGCAAAGATAACCGCATTATTCGACCCAATGCCGATTAT	559	117	operon	10	8	0	2	1	0	4	6	0	87	46	15	8	5	335.609	262	214.848	prpC	2-methylcitrate synthase (NCBI)	372	C	Citrate synthase	GO:0005737,GO:0050440	2.3.3.5	2-methylcitrate synthase.
CBU_0773	221795	NP_819795.1	29654103	7195	718037	718507	+	718434	718483	Spotted	TTTCCACTCACATTGAAGATTTATCAGACGAAGAAATTCGAAAGCGCGCG	559	117	operon	10	10	0	0	0	0	0	0	0	27	15	8	2	0	360.37	287	209.314	CBU_0773	hypothetical protein (NCBI)	2764	S	Uncharacterized protein conserved in bacteria
CBU_0774	221796	NP_819796.1	29654104	7195	718636	718884	+	718835	718884	Spotted	AAAAGGGAAGAACGATAGATCACAACGAGGTTAAAGGTCCACAAGAGTAA	560	118	operon	10	10	0	0	0	0	0	0	0	42	29	11	3	0	389.619	348	202.211	CBU_0774	PspC domain protein (NCBI)	1983	KT	Putative stress-responsive transcriptional regulator
CBU_0775	221797	NP_819797.1	29654105	7195	718891	719232	+	719044	719093	Spotted	AAAGCTTATCAAAGTTTACTGGATGATAATGTCATTGAGAAACGCCGCGG	560	118	operon	7	7	0	2	0	0	0	0	0	35	20	6	3	2	341.514	281	215.949	CBU_0775	transcriptional regulator, GntR family (NCBI)	1725	K	Predicted transcriptional regulators	GO:0006355,GO:0005622,GO:0003700
CBU_0776	221798	NP_819798.1	29654106	7195	719229	720080	+	719813	719862	Spotted	TTTAACGAATCTAATTATGATTGATCGAGGTGAGCTCCTTCTTGAATCCT	560	118	operon	7	7	0	2	0	0	0	0	0	40	12	6	3	2	286.85	195	220.204	CBU_0776	ABC transporter, ATP-binding protein (NCBI)	1131	V	ABC-type multidrug transport system, ATPase component	GO:0005524,GO:0016887
CBU_0777	221799	NP_819799.2	215919041	7195	720077	720991	+	720904	720953	Spotted	TACGATGGGGATAGGAATTCTCCTCAGCTTAATCTGCTACATACTAGCCG	560	118	operon	9	6	0	5	0	0	0	0	0	38	14	7	3	2	313.921	227	225.082	CBU_0777	ABC transporter permease (RefSeq)
CBU_0777c	5437843	YP_002332976.1	215919042	7195	721960	721562	-					561		-	0	0	0	0	0	0	0	0	0									CBU_0777c	hypothetical protein (RefSeq)
CBU_0778	2210014			7195	721524	721007	-					562		-	0	0	0	0	0	0	0	0	0									CBU_0778
CBU_0779					721550	721601		721550	721601	Spotted	TGCTTAGTTTATCTAAAACCATGAGGATAACAAGTTATGGGTTAAATGCGTT	563		-	0	0	0	0	0	0	0	0	0
CBU_0780	221801	NP_819801.1	29654109	7195	722166	722816	+	722311	722360	Spotted	ATGTCGTCATGCTTGATTTTCAATTACCGGACACTAACGGCCTTGAATTG	564		-	1	1	0	0	0	0	0	0	0	23	2	1	0	0	209.087	173	110.489	CBU_0780	DNA-binding response regulator, LuxR family (NCBI)	2197	TK	Response regulator containing a CheY-like receiver domain and an HTH DNA-binding domain	GO:0006355,GO:0000160,GO:0005622,GO:0000156,GO:0043565,GO:0003700
CBU_0781	221802	NP_819802.1	29654110	7195	722881	723897	+	723678	723727	Spotted	TCCTCAGCTTTTCTTCGAGATTTCTAAGTTGGTTGAAATTATTTCCGACT	565		-	10	1	0	9	0	0	0	0	0	35	17	12	0	0	373.629	240	232.924	CBU_0781	ankyrin repeat domain protein (NCBI)
CBU_0782	221803	NP_819803.1	29654111	7195	724097	725485	+	725311	725362	Spotted	AGAAGCAAAGTTTTATTTCCGATTTTCTATAGCTTGTGTTGCGGGATTATTA	566		-	1	1	0	0	0	0	0	0	0	2	2	0	0	0	443	443	70.7107	CBU_0782	hypothetical protein (NCBI)
CBU_0783	2210015			7195	726489	725502	-					567		-	0	0	0	0	0	0	0	0	0									CBU_0783
CBU_0784	221804	NP_819804.1	29654112	7195	726619	726726	+	726631	726673	Spotted	CGGGGCGAAAATAAATTACGAGTCTCTTGCTGCCTTCATGGAA	568		-	1	1	0	0	0	0	0	0	0	8	2	0	0	0	249.125	215.5	111.117	CBU_0784	hypothetical protein (NCBI)
CBU_0785					727001	727043		727001	727043	Spotted	AAGGGCATTATTAAGCCGTTACCAATCAGAAGTTTTGCTGGGG	569		-	2	2	0	0	0	0	0	0	0	8	4	1	0	0	320.125	295.5	150.771
CBU_0786	221806	NP_819806.2	215919043	7195	726996	728168	+	727763	727814	Spotted	TGGGTTGATTTCAATTGCAACAGTGAATGAAGATCAGTTTAGAAAATTTTGT	570		-	4	4	0	0	0	0	0	0	0	31	9	2	0	0	243.032	192	121.258	CBU_0786	coA-transferase family III protein (RefSeq)	1804	C	Predicted acyl-CoA transferases/carnitine dehydratase	GO:0008152,GO:0003824
CBU_0787	221807	NP_819807.2	215919044	7195	728202	729746	+	729697	729746	Spotted	CTGCGTTGGTTCAAATGAGAAAGTTGGGAGTAAAAGAAAATGCTGAGTGA	571	119	operon	10	8	5	6	0	0	0	1	3	82	35	6	3	3	283.902	228.5	166.413	CBU_0787	AMP-binding enzyme domain protein (RefSeq)	1020	Q	Non-ribosomal peptide synthetase modules and related proteins	GO:0008152,GO:0003824,GO:0016874
CBU_0788	221808	NP_819808.1	29654116	7195	729736	734574	+	734479	734528	Spotted	GATTTAATACGGGAAACCTCTTTTGGAGGGATGGTAAGGTTTGTGGAAGC	571	119	operon	7	6	4	5	0	0	0	2	0	34	16	6	4	2	325.5	242	232.151	CBU_0788	polyketide synthase, putative (NCBI)	3321	Q	Polyketide synthase modules and related proteins	GO:0009058,GO:0048037,GO:0016491,GO:0016740,GO:0031177
CBU_0789	221809	NP_819809.2	215919045	7195	734690	737185	+	736960	737009	Spotted	AAAGGCCTATCAAGAAAGAAATAATGAGATTTTACGTGCCGAATTGCATC	571	119	operon	5	5	1	1	0	0	0	0	1	25	10	2	0	0	269.08	236	113.993	CBU_0789	two component system histidine kinase (RefSeq)	642	T	Signal transduction histidine kinase	GO:0006355,GO:0000160,GO:0016310,GO:0018106,GO:0016020,GO:0000155,GO:0000156,GO:0005524
CBU_0790	221810			7195	737435	740622	+	738436	738487	Spotted	ACACATTTTGGAATTTTCCTATTTGATCTTCAAGCAGATTCAAAAGGGTTAT	572		-	3	3	1	0	0	0	0	0	0	8	5	2	1	1	396.375	303	259.472	CBU_0790	hypothetical protein (RefSeq)
CBU_0791					740526	740575		740526	740575	Spotted	TTATGCGATGTTTGCGTATTTGGCTAAGGAAACTGAGTCAACAAATGCAG	573		-	3	3	1	0	0	0	0	0	0	8	5	2	1	1	396.375	303	259.472
CBU_0792	221812	NP_819812.2	215919046	7195	740711	742099	+	741881	741930	Spotted	ATTGCGGCTTTAACTCGAATGATACAAAATTTAGCGATTGCGTTTGAGGC	574		-	3	2	0	1	0	0	0	0	0	43	14	2	0	0	243.884	210	108.097	CBU_0792	multidrug resistance protein B (RefSeq)				GO:0015904,GO:0046677,GO:0016021,GO:0015520
CBU_0793	221813	NP_819813.1	29654121	7195	742817	742203	-	742248	742297	Spotted	CAGGCTTGGATAAATTCCATTTGGTTCAATTAGGAAAGAAAATTATGCCA	575		-	1	1	0	0	0	0	0	0	0	1	1	1	0	0	705	705	#DIV/0!	CBU_0793	hypothetical protein (NCBI)
CBU_0794	221814	NP_819814.1	29654122	7195	744258	742864	-	742935	742984	Spotted	AACTTTCTTCCATGCCAATTTAAACTCTAACTCTTCTAACCCAACGAACG	576		-	1	1	0	3	0	0	0	0	0	31	8	3	0	0	248.161	177	156.567	CBU_0794	hypothetical protein (NCBI)
CBU_0795	221815	NP_819815.2	215919047	7195	745260	744694	-	744856	744905	Spotted	TACAAGAAAATCTCACCAAACAAATCGCAGAAGCCATATTAACCGCGACG	577	120	operon	10	7	1	0	0	0	5	3	0	181	126	58	18	3	408.812	356	209.293	folE	GTP cyclohydrolase I (RefSeq)	302	H	GTP cyclohydrolase I	GO:0019438,GO:0005737,GO:0003934	3.5.4.16	GTP cyclohydrolase I.
CBU_0796	221816	NP_819816.1	29654124	7195	745601	745260	-	745523	745572	Spotted	AAAAGGCGAAATAGGCGAATTAATTTACGAAGATAAGCAAGTGGTCGCTT	577	120	operon	10	10	0	0	0	0	0	0	0	202	132	48	5	0	374.45	334.5	175.695	CBU_0796	HIT family protein (NCBI)	537	FGR	Diadenosine tetraphosphate (Ap4A) hydrolase and other HIT family hydrolases	GO:0003824
CBU_0797	221817	NP_819817.1	29654125	7195	747198	745618	-	745939	745988	Spotted	GTTATTCACGAATGCTAGGCACTTCCATTGGCATTTCCTTACTAAGCACG	577	120	operon	10	10	0	1	0	0	0	1	0	72	28	7	3	1	277.319	215	169.727	CBU_0797	drug resistance transporter, EmrB/QacA family (NCBI)	2814	G	Arabinose efflux permease	GO:0015904,GO:0046677,GO:0016021,GO:0015520
CBU_0798	221818	NP_819818.1	29654126	7195	748194	747199	-	747364	747413	Spotted	ACCCTCATCAAATATTTATCGGCAAAGTCGTCGATGTTAACAAAGACAGC	577	120	operon	10	10	0	1	0	0	0	1	0	73	27	7	4	1	283.192	216	170.377	CBU_0798	multidrug resistance protein (NCBI)	1566	V	Multidrug resistance efflux pump	GO:0009306,GO:0016020,GO:0008565
CBU_0799	221819	NP_819819.1	29654127	7195	748218	748343	+	748240	748291	Spotted	GGCTTTGTGGTGTTAAAACTCATTTTTGTTGTGTTAACATAAGTCACATGAT	578	121	operon	0	0	0	0	0	0	0	0	0									CBU_0799	hypothetical protein (NCBI)
CBU_0800	221820	NP_819820.1	29654128	7195	748340	748753	+	748415	748464	Spotted	TACCATTATGATTTGCTAGATACTCAAGACAGGCAAGTCGGAGTGTTGCT	578	121	operon	5	5	0	0	0	0	0	0	0	5	5	5	1	0	659	635	121.153	CBU_0800	hypothetical protein (NCBI)
CBU_0801	221821	NP_819821.1	29654129	7195	748750	749187	+	749038	749087	Spotted	ACACGGCTGTTATTAGAAGTACGAAAATCTAATAGATCCGCTATCGAATT	578	121	operon	10	10	1	0	0	0	0	0	0	107	64	19	5	1	354.393	320	185.689	rimI	ribosomal-protein-alanine acetyltransferase (NCBI)	456	R	Acetyltransferases	GO:0006474,GO:0009323,GO:0008999	2.3.1.128	Ribosomal-protein-alanine N-acetyltransferase.
CBU_0802	221822	NP_819822.2	215919048	7195	750014	749208	-	749278	749327	Spotted	GGACTTACACCTAAATTAGCTGCTTCCGCTTTAGCAATCGATGAAGCAAG	579		-	2	2	0	0	0	0	0	0	0	2	2	2	0	0	598	598	11.3137	CBU_0802	hypothetical protein (RefSeq)
CBU_0803	221823	NP_819823.1	29654131	7195	750192	751247	+	751198	751247	Spotted	AGCAAAAGTTGGATGATGGAAGTGTCATTAAAGTTCAGAAAGATGCGTAG	580	122	operon	5	5	0	4	0	1	0	3	0	50	13	5	4	3	270.16	192.5	207.373	CBU_0803	efflux transporter, RND family, MFP subunit (NCBI)	845	M	Membrane-fusion protein	GO:0009306,GO:0016020,GO:0008565
CBU_0804	221824	NP_819824.1	29654132	7195	751255	754293	+	754202	754251	Spotted	TGATTGTGGGTGGATTATTGTTCGGCACTTTCTTTTCCCTAATCGTTGTG	580	122	operon	4	4	0	3	0	0	0	3	0	40	10	4	3	1	265.275	194.5	199.675	CBU_0804	transporter, AcrB/AcrD/AcrF family (NCBI)	841	V	Cation/multidrug efflux pump
CBU_0805	221825	NP_819825.2	215919049	7195	754767	754657	-	754667	754716	Spotted	ACTATTCTGGGGGTATCAGGAACAGTAACAGTAAAATCGGAATTGACTGG	581		-	2	2	0	0	0	0	0	0	0	2	2	1	0	0	524	524	87.6812	CBU_0805	hypothetical protein (RefSeq)
CBU_0806	221826	NP_819826.1	29654134	7195	754978	754871	-	754871	754913	Spotted	AGAATTGCTGCACTCTCCCTTAAACGGGAATGATGAATTTTAA	582		-	2	2	0	0	0	0	0	0	0	2	2	2	0	0	625	625	55.1543	CBU_0806	hypothetical protein (NCBI)
CBU_0807	221827	NP_819827.1	29654135	7195	755036	756175	+	756086	756135	Spotted	TTTGCTTTAGCGGTCAACGTGAGTCGTAAACTCATTCATTTTCATGAGCC	583		-	3	2	1	1	0	0	0	0	0	23	4	1	0	0	231.522	190	123.488	CBU_0807	beta-lactamase (NCBI)	1680	V	Beta-lactamase class C and other penicillin binding proteins	GO:0030655,GO:0046677,GO:0008800
CBU_0808	221828	NP_819828.1	29654136	7195	758969	756207	-	756670	756721	Spotted	GGCCTCAATTCAATATCCACGAAATGAATTATGATGCTAAAGTTGAAATTGA	584		-	10	10	0	0	0	0	1	3	0	254	178	51	7	2	365.598	328.5	170.697	valS	valyl-tRNA synthetase (NCBI)	525	J	Valyl-tRNA synthetase	GO:0006438,GO:0005737,GO:0004832,GO:0005524	6.1.1.9	Valine--tRNA ligase.
CBU_0809	221829	NP_819829.2	215919050	7195	759106	760224	+	760104	760153	Spotted	ATACCTTGGATTATGGTGGATTCTTGGTTTGCTTTTGTTGCTAGCCATCG	585	123	operon	9	9	0	1	0	0	1	1	0	72	22	5	3	1	260.958	196.5	169.591	CBU_0809	putative permease (RefSeq)	795	R	Predicted permeases	GO:0016021
CBU_0810	221830	NP_819830.1	29654138	7195	760212	761279	+	760938	760987	Spotted	CAATCCATTGTGGGTCTTTATCATACCATTCGTTATCATCAGCAAGCAGG	585	123	operon	10	9	0	2	0	0	0	2	1	98	45	14	4	1	308.255	243	173.719	CBU_0810	hypothetical protein (NCBI)	795	R	Predicted permeases	GO:0016021
CBU_0811	221831	NP_819831.1	29654139	7195	761280	762857	+	762713	762762	Spotted	AGAAAGATTTAATCAGGAACAATCGCGTAATTTGGCTTACGATGGCGGTG	585	123	operon	10	10	0	0	1	0	0	1	0	140	86	24	3	0	341.979	289.5	164.335	prfC	peptide chain release factor 3 (NCBI)	4108	J	Peptide chain release factor RF-3	GO:0006415,GO:0005737,GO:0003924,GO:0016149,GO:0005525
CBU_0812	221832	NP_819832.1	29654140	7195	762872	764230	+	763892	763943	Spotted	GCCTCGCTTTATATCGATGTTAAAGCTCCTCAATACACTCATATGATTCATT	585	123	operon	8	8	0	0	0	0	0	0	0	78	33	4	3	0	267.705	221.5	139.468	CBU_0812	MATE efflux family protein (NCBI)	534	V	Na+-driven multidrug efflux pump	GO:0006855,GO:0016020,GO:0015238,GO:0015297
CBU_0813	221833	NP_819833.1	29654141	7195	764518	764976	+	764927	764976	Spotted	TTGCGGAACACTTATTTTATTGGATGACCGGTGATTGTGAAATAGAATGA	586		-	6	6	0	0	0	0	0	0	0	8	8	0	0	0	404.625	416	34.7314	CBU_0813	hypothetical protein (NCBI)
CBU_0814	221834			7195	765359	767212	+	766050	766099	Spotted	TGATCATTTTGTCCAATTCACGGCTACAAGTAATGTCACGTTTGGATTGA	587		-	3	3	0	0	0	0	0	0	0	8	4	2	2	0	408.25	252	261.955	CBU_0814	hypothetical protein (RefSeq)
CBU_0815					766868	766919		766868	766919	Spotted	CCGGTATCCATAACTTAGAGTATTTACTCTATAACGTCCTGGTCGAAAGATA	588		-	4	3	2	1	0	0	0	0	1	33	5	3	2	1	260.848	201	193.809
CBU_0816					767153	767202		767153	767202	Spotted	TATGATCCCTTGGATTATTTTAATTTGATTCAACCAGAAATCAGCTGCAC	588		-	2	2	1	0	0	0	0	0	0	8	3	2	2	1	404.25	237.5	286.132
CBU_0817	221837	NP_819837.2	215919051	7195	767844	767242	-	767242	767291	Spotted	CTACGGCACACCTCATGATGCGATTAAACGTGAAGGATTTAAAGAAGTAA	589		-	6	4	0	3	0	0	0	0	0	28	12	2	0	0	275.036	221	129.347	aacA4	GNAT family acetyltransferase (RefSeq)				GO:0008152,GO:0008080	2.3.1.82	Aminoglycoside N(6')-acetyltransferase.
CBU_0818	221838	NP_819838.1	29654146	7195	768058	768639	+	768563	768612	Spotted	TAGCCCGTCTTTATCAGGATGAGAAAAGATTGGTGCAGATTAAGGATGTG	590		-	3	3	0	0	0	0	0	0	0	25	12	3	0	0	263.2	201	133.862	CBU_0818	transcriptional regulator, TetR family (NCBI)	1309	K	Transcriptional regulator	GO:0006355,GO:0003700
CBU_0819	221839	NP_819839.1	29654147	7195	768696	769370	+	769306	769357	Spotted	GGGCTAGATTGCATGAGTATTTTAAACAAATTATTTCCAGAGCCTCGTTTAA	591		-	7	7	0	0	0	0	0	0	0	44	14	2	0	0	254.773	191.5	128.868	CBU_0819	glutathione S-transferase family protein (NCBI)	625	O	Glutathione S-transferase
CBU_0820	221840			7195	769444	770774	+	770382	770431	Spotted	ATTTCTTTGCCTCGATTTTAATGCGATCACTGTGATTCCAGCGGAAATTG	592		-	6	3	1	3	0	0	0	0	0	45	14	4	1	1	264.378	217	148.874	CBU_0820	leucine rich repeat domain protein (RefSeq)
CBU_0821					770647	770696		770647	770696	Spotted	AACGATTAGAATACTTATTCCTGGGTGATATAGGAAATTTTGAGGGCGCA	593		-	2	2	1	0	0	0	0	0	0	4	4	1	1	1	480.75	381.5	289.01
CBU_0822	221842	NP_819842.1	29654150	7195	771975	770839	-	771033	771082	Spotted	CACCGAGCTAAATGCCCGTCAAATAAAAGTATTAAACCGTTTACTCGATG	594		-	3	3	0	1	0	0	0	0	1	11	7	0	0	0	298.455	285	103.934	CBU_0822	hypothetical protein (NCBI)	3177	S	Uncharacterized conserved protein	GO:0000074
CBU_0823	221843	NP_819843.1	29654151	7195	774118	772421	-	772431	772480	Spotted	GAAACACTGGTCGATCAACAAATCTGGGAACCTCATTATTTATCTTACCG	595		-	10	1	0	0	0	0	9	4	0	88	58	19	10	3	386.045	352	217.45	sfcA	malate oxidoreductase (NCBI)	281	C	Malic enzyme	GO:0006108,GO:0004470,GO:0016619,GO:0051287	1.1.1.38	Malate dehydrogenase (oxaloacetate-decarboxylating).
CBU_0824	221844	NP_819844.1	29654152	7195	775531	774146	-	774344	774393	Spotted	CACATTCGGAAGTGCTAGCAGAAGCTTTACAAACAGTAATGCGTCGATAC	596		-	10	9	0	1	4	0	7	3	0	151	85	35	9	6	362.199	301	207.427	purB	adenylosuccinate lyase (NCBI)	15	F	Adenylosuccinate lyase	GO:0009152,GO:0004018	4.3.2.2	Adenylosuccinate lyase.
CBU_0825	221845	NP_819845.1	29654153	7195	775635	776744	+	776695	776744	Spotted	TTTGTGACGAATTATTAAGCATTGTGAGCTGTAAGAGTGTCAACGGATAG	597	124	operon	10	10	0	3	0	0	0	3	1	112	62	24	8	1	353.009	287.5	199.995	CBU_0825	pleiotropic regulatory protein (NCBI)	399	M	Predicted pyridoxal phosphate-dependent enzyme apparently involved in regulation of cell wall biogenesis	GO:0003824,GO:0030170
CBU_0826	221846	NP_819846.1	29654154	7195	776731	777234	+	777159	777208	Spotted	AGTCACTTTGTTATTGGACATGGTTGGTAAAGTAACCCGTGTTGAAGTGC	597	124	operon	10	10	0	0	0	0	0	1	0	73	36	13	2	1	318.973	246	174.415	CBU_0826	transcriptional antitermination protein, putative (NCBI)	250	K	Transcription antiterminator	GO:0006355,GO:0003711
CBU_0827	221847	NP_819847.1	29654155	7195	777269	777865	+	777442	777493	Spotted	TCCAGCCAATCGTTATTTATATTATTTAACGCCGAAAGGTTTTGCAGAGAAA	597	124	operon	10	10	0	1	0	0	0	0	0	54	33	14	2	1	365.167	318	196.085	CBU_0827	hypothetical protein (NCBI)
CBU_0828	221848	NP_819848.1	29654156	7195	777942	779495	+	779446	779495	Spotted	ACGGTGTGAATGATGAGAATGAATTAATTGAGATCGCCTGTATTAGTTAA	598	125	operon	10	10	0	2	0	0	0	3	2	81	55	25	10	5	419.642	352	239.976	CBU_0828	oxidoreductase, Gfo/Idh/MocA family/transferase hexapeptide repeat protein (NCBI)	673	R	Predicted dehydrogenases and related proteins	GO:0006118,GO:0008415,GO:0016491
CBU_0829	221849	NP_819849.2	215919052	7195	779510	780505	+	780409	780458	Spotted	AGAAGTGGGTTTAACCGAAGGATTACAAAGATTAATTGAATGGCGTCGTT	598	125	operon	10	10	0	2	0	0	7	5	0	144	71	36	16	11	361.757	242	245.883	CBU_0829	NAD dependent epimerase/dehydratase family (RefSeq)	451	MG	Nucleoside-diphosphate-sugar epimerases	GO:0044237,GO:0003978,GO:0016491,GO:0050662	5.1.3.2	UDP-glucose 4-epimerase.
CBU_0830	221850	NP_819850.1	29654158	7195	780502	781656	+	781584	781635	Spotted	GGCGATTCCTCTTCATAATCGTATGACTAAAGATGATTACGATTACGTCATT	598	125	operon	10	10	0	3	0	0	3	1	1	85	53	29	11	6	416.788	354	245.479	CBU_0830	polysaccharide biosynthesis protein (NCBI)	399	M	Predicted pyridoxal phosphate-dependent enzyme apparently involved in regulation of cell wall biogenesis	GO:0003824,GO:0030170
CBU_0831	221851	NP_819851.1	29654159	7195	781659	783557	+	783497	783547	Spotted	TTTGTCTAAGGGTCATAAATCTAATTATCATTTGTTTACGCCAGAAACGGT	598	125	operon	10	6	0	3	0	0	5	2	1	91	54	33	22	6	445.934	331	280.251	asnB-1	asparagine synthetase B, glutamine-hydrolyzing (NCBI)	367	E	Asparagine synthase (glutamine-hydrolyzing)	GO:0006529,GO:0004066	6.3.5.4	Asparagine synthase (glutamine-hydrolyzing).
CBU_0832	221852	NP_819852.1	29654160	7195	783558	784109	+	783990	784039	Spotted	GGCGCTAATAGTTTTGTAAATACTAATGTGCCTGCTTATTCAATAGTGGC	598	125	operon	10	10	0	0	0	0	0	0	1	77	37	18	8	4	359.455	248	235.073	CBU_0832	acetyltransferase, putative (NCBI)	663	R	Carbonic anhydrases/acetyltransferases, isoleucine patch superfamily	GO:0008415
CBU_0833	221853	NP_819853.1	29654161	7195	784120	785925	+	785821	785870	Spotted	GTGTTACATGAAGGAAAGATTGTTTCAGAAGGTAATCACAACGAACTTGT	598	125	operon	10	10	0	2	0	0	0	1	1	84	45	17	7	0	348.476	258	206.927	CBU_0833	ABC transporter, ATP-binding/permease protein (NCBI)	2274	V	ABC-type bacteriocin/lantibiotic exporters, contain an N-terminal double-glycine peptidase domain	GO:0006810,GO:0016021,GO:0005524,GO:0042626,GO:0016887
CBU_0834	221854	NP_819854.1	29654162	7195	785938	786924	+	786592	786643	Spotted	TGGGAAGACATTAAATCTTTGTCAAAGCTAGGGAAGATTTTAGGAGATCTTA	598	125	operon	10	10	0	0	0	0	0	0	0	32	18	10	6	0	401.969	277.5	251.655	CBU_0834	hypothetical protein (NCBI)	2226	H	Methylase involved in ubiquinone/menaquinone biosynthesis	GO:0008152,GO:0008168
CBU_0835	221855	NP_819855.1	29654163	7195	786933	787202	+	787144	787193	Spotted	ATTGGCTTTCTGACGTATTAAGCAAAATGTTAGAGCAACACATGTGGTGG	598	125	operon	10	10	0	0	0	0	0	0	0	20	15	10	6	0	499	489	233.292	CBU_0835	hypothetical protein (NCBI)
CBU_0836	221856	NP_819856.2	215919053	7195	787206	788282	+	788221	788270	Spotted	GAACTCCCACATTGAAAGAATCGATACCGGCTGAGATTCCAATGCAATTG	598	125	operon	10	9	0	1	0	0	0	0	0	52	23	9	1	0	308.212	237	169.173	CBU_0836	radical SAM domain-containing protein (RefSeq)	535	R	Predicted Fe-S oxidoreductases	GO:0003824,GO:0051536
CBU_0837	221857	NP_819857.1	29654165	7195	788297	789781	+	789525	789574	Spotted	ATTGCCTTCCTTATCACCTAGCTGATTTTGTTGCTTATCATACGCGCAAG	599		-	10	10	0	0	0	0	0	0	0	20	17	4	1	0	401.1	386.5	147.258	CBU_0837	hypothetical protein (NCBI)
CBU_0838	221858	NP_819858.2	215919054	7195	790067	791167	+	790744	790795	Spotted	TGTTGGTGATGGGGAATTACGTAATAAATTGAAACAGTTTGCAGTAAACTTA	600		-	10	10	1	2	0	0	0	1	2	97	57	18	5	1	335.526	265	186.14	CBU_0838	lipopolysaccharide N-acetylglucosaminyltransferase (RefSeq)	438	M	Glycosyltransferase	GO:0009058	2.4.1.-
CBU_0839	221859	NP_819859.1	29654167	7195	791303	792595	+	792427	792476	Spotted	TTTAGAGGCTTGTGTTTTGCGTTATGATCAATTTTATGAGGCTATGCTAG	601	126	operon	10	10	1	2	0	0	0	0	2	82	31	6	4	2	278.878	214.5	168.203	CBU_0839	glycosyl transferase, group 1 family protein (NCBI)	438	M	Glycosyltransferase	GO:0009058	2.4.1.-
CBU_0840	221860	NP_819860.1	29654168	7195	792595	794508	+	794445	794494	Spotted	AAGAAATTGGCAATATTCACTTTGGAGCGTGCTTATGTTCCAATTGTGGC	601	126	operon	10	3	0	2	0	0	8	1	1	96	57	29	20	3	412.99	310	262.005	asnB-2	asparagine synthetase B, glutamine-hydrolyzing (NCBI)	367	E	Asparagine synthase (glutamine-hydrolyzing)	GO:0006529,GO:0004066	6.3.5.4	Asparagine synthase (glutamine-hydrolyzing).
CBU_0841	221861	NP_819861.1	29654169	7195	794515	795648	+	795558	795608	Spotted	GCGTGCAAGAGTAGAGTCCAAATATGAGTTGGACAAAATTAATTTTCAAAC	601	126	operon	10	10	1	3	0	0	0	1	2	98	56	22	7	3	369.541	295	210.25	CBU_0841	glycosyl transferase, group 1 family protein (NCBI)	438	M	Glycosyltransferase	GO:0009058
CBU_0842	221862	NP_819862.1	29654170	7195	795879	796976	+	796887	796936	Spotted	AATGATATGTCTGAGTCTAGGCCAATGTTTTATGGTGACGGTAATGCTGC	602	127	operon	10	9	1	0	1	0	4	6	0	150	95	39	15	3	386.027	307	211.952	wecB	UDP-N-acetylglucosamine 2-epimerase (NCBI)	381	M	UDP-N-acetylglucosamine 2-epimerase	GO:0006047,GO:0009103,GO:0008761	5.1.3.14	UDP-N-acetylglucosamine 2-epimerase.
CBU_0843	221863	NP_819863.2	215919055	7195	796987	798144	+	798079	798130	Spotted	GGTCTAATAGCAAAACAGCTTGAAATTGATTTGTACCGCTCATTATATCAGA	602	127	operon	5	4	0	1	0	0	0	0	1	43	8	2	1	0	221.023	175	122.206	CBU_0843	glycosyltransferase (RefSeq)	438	M	Glycosyltransferase	GO:0005975,GO:0009058
CBU_0844	221864	NP_819864.2	215919056	7195	799168	798149	-	798354	798405	Spotted	CCAAAAGCAACGCACCTTATCGAATTTATAATATCGGCAGTAATAATCCTAT	603	128	operon	10	10	0	0	1	0	0	7	0	127	85	34	7	2	389.268	340	200.183	CBU_0844	capsular polysaccharide biosynthesis protein (RefSeq)	451	MG	Nucleoside-diphosphate-sugar epimerases	GO:0005975,GO:0044237,GO:0016857,GO:0050662	5.1.3.-,5.1.3.7	,UDP-N-acetylglucosamine 4-epimerase.
CBU_0845	221865	NP_819865.1	29654173	7195	800445	799156	-	799241	799291	Spotted	TCATGACCAATTTCACCAATATTCTTTAGAAGACTATCACGCCAAATTGGC	603	128	operon	10	10	1	0	2	0	1	7	1	122	77	30	18	3	392.721	322	224.343	CBU_0845	UDP-glucose/GDP-mannose dehydrogenase family (NCBI)	677	M	UDP-N-acetyl-D-mannosaminuronate dehydrogenase	GO:0006118,GO:0016616,GO:0051287
CBU_0846	221866	NP_819866.1	29654174	7195	800503	801852	+	801769	801818	Spotted	CAACCGCATCAATTACAGGAATGGGGATTTGATTATTTTGCGATTGCTCG	604		-	10	9	1	1	0	1	4	5	2	181	131	50	12	5	397.53	329	200.958	ugd	UDP-glucose 6-dehydrogenase (NCBI)	1004	M	Predicted UDP-glucose 6-dehydrogenase	GO:0006118,GO:0003979,GO:0051287	1.1.1.22	UDP-glucose 6-dehydrogenase.
CBU_0847	221867	NP_819867.1	29654175	7195	801866	802630	+	802559	802608	Spotted	ATTATTGAAAACCCCTATTTAAATGGGAGCGTGATCCGTTTAGATGGCGC	605	129	operon	10	10	0	0	0	0	10	3	0	54	28	19	14	11	438.204	258.5	306.662	CBU_0847	3-oxoacyl-(acyl-carrier-protein) reductase (NCBI)	4221	R	Short-chain alcohol dehydrogenase of unknown specificity	GO:0008152,GO:0003857,GO:0016491	1.1.1.100,1.1.1.35	3-oxoacyl-[acyl-carrier-protein] reductase.,3-hydroxyacyl-CoA dehydrogenase.
CBU_0848	221868	NP_819868.1	29654176	7195	802640	804283	+	804224	804273	Spotted	GACAGTTCTACGGAACGATTGATCAATTACGTGCTCAAAATAAAAGGTAA	605	129	operon	10	8	0	0	2	0	8	6	0	188	127	52	15	7	353.5	353.5	208.626	pgi	glucose-6-phosphate isomerase (NCBI)	166	G	Glucose-6-phosphate isomerase	GO:0006094,GO:0006096,GO:0004347	5.3.1.9	Glucose-6-phosphate isomerase.
CBU_0849	221869	NP_819869.1	29654177	7195	804280	805167	+	804766	804815	Spotted	CAGGTGCCTTTAAATCAAACCGATAAATATGGCATCGTTTCTGTGGTGGA	605	129	operon	10	10	1	0	0	0	5	5	1	226	162	52	14	7	381	381	195.342	galU	UTP-glucose-1-phosphate uridylyltransferase (NCBI)	1210	M	UDP-glucose pyrophosphorylase	GO:0006011,GO:0009058,GO:0003983	2.7.7.9	UTP--glucose-1-phosphate uridylyltransferase.
CBU_0850	221870	NP_819870.2	215919057	7195	805231	806124	+	806066	806115	Spotted	TTTATTACCTCATCAAGTATCTTCACGTTCTGCGACAAAGGCATTGGCAC	606		-	10	8	0	2	0	0	0	0	0	42	15	4	0	0	206	206	140.787	CBU_0850	hypothetical membrane spanning protein (RefSeq)
CBU_0851	221871	NP_819871.1	29654179	7195	806380	806649	+	806600	806649	Spotted	ATCTCCAACGATATCTCAAACTTATTGAACGATTAGGATTGCGCTCATAA	607	130	operon	10	8	0	1	7	6	0	9	0	280	212	76	30	8	357	357	209.828	rpsO	ribosomal protein S15 (NCBI)	184	J	Ribosomal protein S15P/S13E	GO:0006412,GO:0005840,GO:0003735
CBU_0852	221872	NP_819872.1	29654180	7195	806660	808750	+	808665	808714	Spotted	TAGAAGAAGGACAAGTGATTCGAGTTAAAGTCATTGAAATTGACCGACAA	607	130	operon	10	6	0	0	3	4	7	5	0	268	184	83	29	13	341	341	225.392	pnp	polyribonucleotide nucleotidyltransferase (NCBI)	1185	J	Polyribonucleotide nucleotidyltransferase (polynucleotide phosphorylase)	GO:0006402,GO:0006396,GO:0000175,GO:0003723,GO:0004654	2.7.7.8	Polyribonucleotide nucleotidyltransferase.
CBU_0853	221873	NP_819873.2	215919058	7195	809318	808842	-	808880	808930	Spotted	CCGATTATTTACTAACTTCGCCTTTATTTGACAGTGATTATCACCCTGAAA	608		-	10	10	0	0	0	0	1	0	0	0	0	0	0	0	#NUM!	#NUM!	#DIV/0!	mgsA	methylglyoxal synthase (RefSeq)	1803	G	Methylglyoxal synthase	GO:0019242,GO:0005737,GO:0008929	4.2.3.3	Methylglyoxal synthase.
CBU_0854	221874	NP_819874.1	29654182	7195	809343	809453	+	809404	809453	Spotted	CCATCGGAATCCAGGTTAAAAGGTTTGAGAAAAGCGCCATCGACTTATAA	609		-	1	1	0	0	0	0	0	0	0	1	1	1	0	0	661	661	#DIV/0!	CBU_0854	hypothetical protein (NCBI)
CBU_0855	2210017			7195	809500	811809	+					610		-	0	0	0	0	0	0	0	0	0									CBU_0855
CBU_0856	221875	NP_819875.2	215919059	7195	811791	813581	+	813440	813489	Spotted	TTGGATTATGGTGTTAGAAGAAGGACGATTAATAGAGAAAGGAACCCATC	611	131	operon	10	10	0	3	0	0	0	2	1	249	119	24	2	1	245	245	142.147	CBU_0856	lipid ABC transporter permease/ATP-binding protein (RefSeq)	1132	V	ABC-type multidrug transport system, ATPase and permease components	GO:0006869,GO:0009276,GO:0016021,GO:0005524,GO:0042626	3.6.3.-
CBU_0857	221876	NP_819876.1	29654184	7195	813581	814558	+	814154	814203	Spotted	GTAGATTTCGTTGTTCCCAAGCAATTACGACCGAATGAAATATACCAATT	611	131	operon	10	8	1	9	0	0	2	3	0	161	98	33	8	4	305	305	192.093	lpxK	tetraacyldisaccharide 4'-kinase (NCBI)	1663	M	Tetraacyldisaccharide-1-P 4'-kinase	GO:0009245,GO:0009029	2.7.1.130	Tetraacyldisaccharide 4'-kinase.
CBU_0858	221877	NP_819877.1	29654185	7195	816183	814555	-	814555	814604	Spotted	GGAAAGATAGGCGATATCCCATTACTTCTGGCTTTGCTAAAGATGTTTAA	612	132	operon	10	3	0	0	0	0	10	0	0	153	112	43	15	5	316	316	217.762	nadE	NAD+ synthetase (NCBI)	171	H	NAD synthase	GO:0009435,GO:0006807,GO:0003952,GO:0005524,GO:0016810,GO:0008795	6.3.1.5,6.3.5.1	NAD(+) synthase.,NAD(+) synthase (glutamine-hydrolyzing).
CBU_0859	221878	NP_819878.1	29654186	7195	816561	816190	-	816285	816334	Spotted	TAAATGGCCTTCTAAAACACAACTAGCACCATTTCATCAACGCCGTATTG	612	132	operon	10	10	0	0	0	0	0	0	0	55	31	6	1	0	264	264	154.323	CBU_0859	hypothetical protein (NCBI)	3737	S	Uncharacterized conserved protein
CBU_0860	221879	NP_819879.2	215919060	7195	816685	817146	+	817045	817096	Spotted	AGTGCTCTTAAAATTCTCTCGGCAATATTTGAAATAAAGGATATCAAGGCAA	613		-	7	7	0	0	0	0	0	0	0	11	11	4	0	0	411	411	146.981	CBU_0860	hypothetical protein (RefSeq)
CBU_0861	221880			7195	817234	819075	+	818276	818325	Spotted	AGATGTGTTATTGGTTGGCTGTGTATTGTCCCTTTATTCCCACCCATTTC	614		-	8	8	1	0	0	0	0	0	0	11	11	6	1	1	512	512	192.064	CBU_0861	hypothetical protein (RefSeq)
CBU_0862					818896	818945		818896	818945	Spotted	GAGGAGTTCTGTAAGCCCTTAAAATATACTGACTTGTTGCGCAATGAGCA	615		-	8	8	1	0	0	0	0	0	0	11	11	6	1	1	512	512	192.064
CBU_0863	221882	NP_819882.1	29654190	7195	819088	819198	+	819094	819143	Spotted	TCTGAGATTGGATTGTCTAAAATGCTCGTCTTTATCACTCCTTGCTCCAC	616		-	0	0	0	0	0	0	0	0	0									CBU_0863	hypothetical protein (NCBI)
CBU_0864	221883	NP_819883.1	29654191	7195	819185	819568	+	819450	819499	Spotted	TTTTAAAGCGTGACCATGCCATTACGAAATCTTCCCTTATCATGCAAGGG	617	133	operon	10	3	0	0	8	7	0	8	0	208	130	60	30	9	334.5	334.5	237.219	rpsF	30S ribosomal protein S6 (NCBI)	360	J	Ribosomal protein S6	GO:0006412,GO:0005840,GO:0003735
CBU_0865	221884	NP_819884.1	29654192	7195	819581	819802	+	819638	819687	Spotted	GATTACAAAGACGTCAACACCTTGAAAGATTACATCATGGAATCGGGGCG	617	133	operon	10	6	0	0	8	8	0	2	0	263	178	68	27	6	338	338	216.848	rpsR	ribosomal protein S18 (NCBI)	238	J	Ribosomal protein S18	GO:0006412,GO:0005840,GO:0003735
CBU_0866	221885	NP_819885.1	29654193	7195	819806	820705	+	820650	820700	Spotted	GCCTGATTGATAGCTTTTATAATTTTCGGAAACGTTACCCATTACTACAGA	617	133	operon	10	6	0	4	0	0	0	0	0	62	27	7	3	0	235	235	166.012	CBU_0866	hypothetical protein (NCBI)
CBU_0867	221886	NP_819886.2	215919061	7195	820717	821181	+	821132	821181	Spotted	TTTCGGTGAATGTGAAAATCGAAGTCGCGCCAGAAAACTCCAATTCATAG	617	133	operon	10	7	0	0	6	7	0	6	0	288	202	83	36	6	349.5	349.5	221.189	rplI	LSU ribosomal protein L9P (RefSeq)	359	J	Ribosomal protein L9	GO:0006412,GO:0005840,GO:0003735
CBU_0868	221887	NP_819887.1	29654195	7195	821430	823262	+	823083	823132	Spotted	GATGAAGTGTATCACGAAGATTCGCCGGATAAAGGAAAGGCTGAAATTAT	618	134	operon	10	9	0	1	0	3	0	5	0	297	191	55	14	4	320	320	182.879	dnaB	replicative DNA helicase precursor (NCBI)	305	L	Replicative DNA helicase	GO:0016539,GO:0006260,GO:0003677,GO:0003678,GO:0017111,GO:0005524	3.6.1.-
CBU_0869	221888	NP_819888.1	29654196	7195	823259	824353	+	824172	824221	Spotted	TATCTATGGACATGATTGCTATTGACTTACGCTCTCAGCCAAATGCACAG	618	134	operon	10	9	2	0	0	0	5	2	0	198	118	34	14	6	291	291	199.866	alr	alanine racemase (NCBI)	787	M	Alanine racemase	GO:0006522,GO:0008784	5.1.1.1	Alanine racemase.
CBU_0870	221889	NP_819889.1	29654197	7195	824350	824598	+	824384	824427	Spotted	GGAAATGCCGTCGTGGAATGTTGGAGTTAGATATTCTTTTAGAA	618	134	operon	10	9	0	2	0	0	0	0	0	40	23	6	3	0	269.5	269.5	187.763	CBU_0870	hypothetical protein (NCBI)	2938	S	Uncharacterized conserved protein
CBU_0871	2210018			7195	825043	824590	-					619		-	0	0	0	0	0	0	0	0	0									CBU_0871
CBU_0872	221890	NP_819890.1	29654198	7195	825771	825124	-	825370	825421	Spotted	AGAGGCTCAATTGCGTGAAATTATGGATATTCGAATATTCATGGACACTCCA	620		-	10	8	0	0	2	0	4	1	0	118	80	27	8	3	330.5	330.5	199.979	udk	uridine kinase (NCBI)	572	F	Uridine kinase	GO:0009058,GO:0004849,GO:0005524	2.7.1.48	Uridine kinase.
CBU_0873	221891	NP_819891.1	29654199	7195	826360	825761	-	825991	826040	Spotted	TGAGGCTACGATCGACTTACACCAACAAACTATTGATGAAGCTGTGAAAA	621		-	10	10	0	0	0	0	0	0	0	65	38	7	1	0	294	294	149.866	CBU_0873	Smr domain protein (NCBI)	2840	S	Uncharacterized protein conserved in bacteria
CBU_0874	221892	NP_819892.1	29654200	7195	826483	827541	+	827482	827531	Spotted	GCGATGTTGGCATTAGTTTTAATGGATCATTATTTGCGGTACAAGGCACA	622	135	operon	10	9	0	6	3	0	3	5	0	271	171	62	13	4	328	328	192.185	aroC	chorismate synthase (NCBI)	82	E	Chorismate synthase	GO:0006810,GO:0009073,GO:0016020,GO:0004107,GO:0005215	4.2.3.5,4.6.1.4	Chorismate synthase.,Transferred entry: 4.2.3.5.
CBU_0875	221893	NP_819893.1	29654201	7195	827554	828576	+	828458	828507	Spotted	ATATTTCCCATCCTAACGGTCTCGATTTATGGATCGTCGCCGACAATATC	622	135	operon	10	10	0	2	0	1	2	5	0	217	149	49	9	3	317	317	186.514	asd	aspartate-semialdehyde dehydrogenase (NCBI)	136	E	Aspartate-semialdehyde dehydrogenase	GO:0009086,GO:0009088,GO:0005737,GO:0004073,GO:0046983,GO:0050661,GO:0051287	1.2.1.11	Aspartate-semialdehyde dehydrogenase.
CBU_0876	221894	NP_819894.1	29654202	7195	829947	828841	-	828949	828999	Spotted	CCCAGAAATAAATTCATCATTTGTTATTGTAAATCAGGACAACGTAGCCGT	623		-	10	9	1	2	3	1	1	2	1	179	120	41	5	1	313	313	179.436	CBU_0876	ThiF family protein (NCBI)	476	H	Dinucleotide-utilizing enzymes involved in molybdopterin and thiamine biosynthesis family 2	GO:0003824
CBU_0877	221895	NP_819895.1	29654203	7195	830133	830249	+	830153	830179	Spotted	GCTTCGCAAAGCTCAGCCCACCCTACG	624		-	3	3	0	0	0	0	0	0	0	4	4	3	0	0	577	577	102.428	CBU_0877	hypothetical protein (NCBI)
CBU_0878	221896			7195	830363	831326	+	830517	830568	Spotted	CGCCTGATAGATTATTAGCGTTACCATTGGATATGTTTAAACATCTCATTCC	625		-	4	4	1	0	0	0	0	0	0	4	4	3	1	1	563	563	237.184	CBU_0878	hypothetical protein (RefSeq)
CBU_0879					831133	831182		831133	831182	Spotted	AATTCCAGAAGATACAACCTCTTCTCAATCAGTTGGAGAATCCGTCCACC	626		-	4	4	1	0	0	0	0	0	0	4	4	3	1	1	563	563	237.184
CBU_0880	221898	NP_819898.2	215919062	7195	831421	832806	+	832757	832806	Spotted	CCTCCTGTCGAATTTCTGATTGCACGGTAAATTACAGTGTATCCGGATAA	627		-	2	2	0	0	0	0	0	0	0	4	4	2	0	0	467.5	467.5	123.616	CBU_0880	hypothetical cytosolic protein (RefSeq)
CBU_0881	221899	NP_819899.1	29654207	7195	833714	833049	-	833195	833246	Spotted	CCAACGGATGTAATGGAATTAATTGAGCGAATAGGTCAAGACAAAATAGAAT	628		-	0	0	0	0	0	0	0	0	0									CBU_0881	hypothetical protein (NCBI)
CBU_0881a	5437844			7195	834729	834022	-					629		-	0	0	0	0	0	0	0	0	0									CBU_0881a
CBU_0883	221900	NP_819900.1	29654208	7195	835255	835121	-	835121	835170	Spotted	GTGGGAAAATAACTCCATGCACTTACGAGTTGACAGGTTGCATACGATAA	630		-	2	2	0	0	0	0	0	0	0	3	3	1	0	0	420	420	69.8307	CBU_0883	hypothetical protein (NCBI)
CBU_0884	221901	NP_819901.1	29654209	7195	835524	837332	+	837217	837266	Spotted	TAGAACAAGCCTTGCAATTTATTGCTGATGACGAGCTAGTCGAAATCACC	631		-	10	10	0	0	0	0	0	0	1	195	115	24	1	0	288	288	143.964	bipA	virulence regulator BipA (NCBI)	1217	T	Predicted membrane GTPase involved in stress response	GO:0005622,GO:0003924,GO:0005525
CBU_0885	221902	NP_819902.2	215919063	7195	837344	838510	+	838134	838185	Spotted	ATTGGAAGAGGCATACAAATAACGATGGAGGAGAAATAATTTCAAAGGGAGC	632		-	3	3	0	0	0	0	0	0	0	3	3	2	0	0	687	687	175.194	CBU_0885	hypothetical cytosolic protein (RefSeq)
CBU_0886	221903	NP_819903.1	29654211	7195	838542	839717	+	839503	839552	Spotted	TTGCATTAGAAACCGATAATCCCCTTGACAATGCGAAATTAAAATTGCAG	633	136	operon	10	7	1	0	1	0	6	3	0	238	167	84	21	3	398	398	208.364	coaBC	phosphopantothenoylcysteine decarboxylase/phosphopantothenate--cysteine ligase (NCBI)	452	H	Phosphopantothenoylcysteine synthetase/decarboxylase	GO:0004632,GO:0004633	4.1.1.36,6.3.2.5	Phosphopantothenoylcysteine decarboxylase.,Phosphopantothenate--cysteine ligase.
CBU_0886a	5437845			7195	839714	840821	+					633	136	operon	0	0	0	0	0	0	0	0	0									CBU_0886a
CBU_0888	221904	NP_819904.1	29654212	7195	841330	840887	-	841156	841205	Spotted	GTATCAGCGGGTATGTATTTACCCATTAACCATCCTGTTGGGAATTGCAG	634	137	operon	8	8	0	1	0	0	0	1	0	34	17	6	2	1	263	263	210.655	CBU_0888	disulfide bond formation protein, DsbB family (NCBI)				GO:0006118,GO:0016020,GO:0015035
CBU_0889	221905	NP_819905.2	215919064	7195	841926	841327	-	841353	841402	Spotted	AGTGAACGTGGAACCCCTTACCCAAAAGCGTTTAGAAGCTTTAATCAAAG	634	137	operon	8	8	0	1	0	0	0	1	0	53	22	5	2	1	214	214	176.528	dsbA	putative disulfide bond formation protein D (RefSeq)	1651	O	Protein-disulfide isomerase
CBU_0890	221906	NP_819906.1	29654214	7195	842666	841965	-	842261	842310	Spotted	TTACTTGATGGATGACCGGGTATTTACTGGGGATACCCTATTAATTCGCG	635		-	10	10	1	0	0	0	0	0	0	143	68	12	3	1	241	241	152.313	CBU_0890	metallo-beta-lactamase family protein (NCBI)	491	R	Zn-dependent hydrolases, including glyoxylases	GO:0016787
CBU_0891	221907	NP_819907.1	29654215	7195	842764	843702	+	843567	843616	Spotted	GAAAATTAATCTGGCTCGGACTTATATTGCGATGGAAGACCCGGTATCAG	636	138	operon	8	7	0	1	0	0	0	0	0	38	17	5	1	0	232	232	185.147	CBU_0891	hypothetical protein (NCBI)
CBU_0892	2210021	YP_338281.1	77358715	7195	843707	844492	+	844408	844457	Spotted	GAATGGACTTTATTTGGTGGAAGTCAATTACCCGCCCAATTTCAAACTGC	636	138	operon	10	8	0	2	0	0	0	2	0	273	187	86	26	2	356	356	208.114	truA	tRNA pseudouridine synthase A (NCBI)	101	J	Pseudouridylate synthase	GO:0001522,GO:0003723,GO:0004730,GO:0016439	5.4.99.12	tRNA-pseudouridine synthase I.
CBU_0893	221908	NP_819908.1	29654216	7195	844523	845398	+	845089	845138	Spotted	ATATAAACTTCCCTATATTTCAGTGCTAACCGATCCGACAATGGGTGGCG	636	138	operon	10	10	1	3	3	2	8	6	0	212	141	53	22	11	322.5	322.5	226.586	accD	acetyl-CoA carboxylase, carboxyl transferase, beta subunit (NCBI)	777	I	Acetyl-CoA carboxylase beta subunit	GO:0006633,GO:0009317,GO:0003989	6.4.1.2	Acetyl-CoA carboxylase.
CBU_0894	221909	NP_819909.1	29654217	7195	845531	846781	+	846645	846694	Spotted	ATTTCGATTCTGTAGCAGATGCATTTAAGAAAGCAGTTGAAGATTGCCGC	636	138	operon	10	9	1	1	1	1	3	6	0	261	155	50	15	7	288	288	193.767	folC	FolC bifunctional protein (NCBI)	285	H	Folylpolyglutamate synthase	GO:0009396,GO:0004326,GO:0005524,GO:0008841	6.3.2.12,6.3.2.17	Dihydrofolate synthase.,Tetrahydrofolate synthase.
CBU_0895	221910	NP_819910.2	215919065	7195	846765	847382	+	847252	847302	Spotted	TCGGCCCTGAGATCAATCGTGATAAAATTAATAAAATTCAGAAGGAATTGA	636	138	operon	10	8	0	2	0	0	0	0	0	63	25	8	1	0	207	207	168.536	dedD	sporulation and cell division repeat protein (RefSeq)	3147	S	Uncharacterized protein conserved in bacteria
CBU_0896	221911	NP_819911.1	29654219	7195	847450	848004	+	847922	847971	Spotted	AATTTCTGCCTTCGCAATTTAAACAGTTTTCACATTGGTTGGCGGATCAG	636	138	operon	10	10	0	0	1	0	0	3	0	85	41	12	5	2	248	248	191.07	dedE	colicin V production protein (NCBI)	1286	R	Uncharacterized membrane protein, required for colicin V production	GO:0009403,GO:0016020
CBU_0897	221912	NP_819912.1	29654220	7195	848013	849533	+	849405	849455	Spotted	ACCGGAGATTATATTGCTGGTAATATTACAAAAGAATATTTGGCCGAGTTG	636	138	operon	10	10	0	4	4	2	5	8	0	222	152	58	23	16	321	321	232.279	purF	amidophosphoribosyltransferase (NCBI)	34	F	Glutamine phosphoribosylpyrophosphate amidotransferase	GO:0009113,GO:0006508,GO:0009116,GO:0004044,GO:0008237,GO:0008270	2.4.2.14	Amidophosphoribosyltransferase.
CBU_0898	221913	NP_819913.1	29654221	7195	849530	849862	+	849803	849852	Spotted	AAAACGCCGAAACTGTGCAAACTGAATTGGTTTTATGAATTGTATCGACG	636	138	operon	10	6	0	4	0	0	0	0	0	60	28	7	3	0	220.5	220.5	182.826	CBU_0898	thyroglobulin type-1 repeat domain protein (NCBI)
CBU_0899	221914			7195	849879	850326	+	850101	850150	Spotted	TATGAAGCTGAAAGTTTTGCTCGTGAAGTGGTGAACGATTTAGAATCCGG	637		-	10	7	0	3	0	0	0	0	0	37	24	7	3	0	296	296	201.043	CBU_0899	hypothetical protein (RefSeq)
CBU_0900	221915	NP_819915.1	29654223	7195	850442	850606	+	850547	850596	Spotted	CCTAAATTAGGAGAGAATTATGCAACCCCAAAGTATAATAAATCCTCCCG	638		-	5	5	0	0	0	0	0	0	0	16	12	0	0	0	342	342	98.9533	CBU_0900	hypothetical protein (NCBI)
CBU_0901	221916			7195	850895	854576	+	851041	851090	Spotted	TTATAGCTACGCAGTATCTTATTTGAAGATGAGGATCCTCTTACTCTCCC	639		-	4	4	1	0	0	0	0	0	0	16	8	3	1	1	258	258	205.941	CBU_0901	hypothetical protein (RefSeq)
CBU_0902					851943	851992		851943	851992	Spotted	AGGACCTCAGGAATCCAAAGTATTAAATTTAGGCTTCGACCCTCGAAAGG	640		-	3	3	1	0	0	0	0	0	0	16	7	3	1	1	233.5	233.5	229.997
CBU_0903					854501	854550		854501	854550	Spotted	AGAAAGAAATAAACCTATTATGGAAAGCCTATTTATGGAAGGGCAACGCC	640			3	3	0	0	0	0	0	0	0	16	4	3	1	0	210.5	210.5	211.889
CBU_0904	221919	NP_819919.1	29654227	7195	854566	855627	+	855442	855491	Spotted	TATCTACCCTATATGGCAAAACAATTAGCGAATGGTGTTCCGCTGTATGC	641		-	10	10	0	0	0	0	0	0	0	174	102	26	1	0	270.5	270.5	150.225	CBU_0904	TIM-barrel protein, yjbN family (NCBI)	42	J	tRNA-dihydrouridine synthase	GO:0008033,GO:0016491,GO:0050660	1.-.-.-
CBU_0905	221920	NP_819920.1	29654228	7195	855878	855639	-	855819	855868	Spotted	ACATACATCCTCCTTATAAACAAATTAAAGTAACTTGCAGTTGCGGCAAC	642		-	10	10	0	2	0	9	0	4	0	176	124	54	30	3	352	352	231.444	rpmE	ribosomal protein L31 (NCBI)	254	J	Ribosomal protein L31	GO:0006412,GO:0005840,GO:0003735
CBU_0906	221921	NP_819921.1	29654229	7195	855998	857296	+	857157	857206	Spotted	GGAATTATCAATTGGCTTTAGGCATATTACCGCTGAGTTTAATTGTCGCT	643		-	1	1	0	0	0	0	0	0	0	11	1	1	0	0	194	194	139.444	CBU_0906	major facilitator family transporter (NCBI)	2271	G	Sugar phosphate permease	GO:0006810,GO:0016021,GO:0005215
CBU_0907	221922	NP_819922.1	29654230	7195	857892	857314	-	857324	857373	Spotted	GATTTGATGGAGACAGATATTCATGCTTTACGAATACACGCAACGGCAGC	644	139	operon	10	10	0	0	0	0	0	0	0	54	31	11	2	1	262	262	182.195	CBU_0907	bolA family protein (NCBI)	2350	S	Uncharacterized protein conserved in bacteria
CBU_0908	221923	NP_819923.1	29654231	7195	858440	857895	-	857999	858050	Spotted	GGGGTTTTGAATCTATTTGTGGTTTATAATTTTGATACTAACACGTGGGTCA	644	139	operon	10	10	0	0	0	0	0	0	0	82	47	19	2	1	276	276	180.513	ispZ	intracellular septation protein A (NCBI)	2917	D	Intracellular septation protein A	GO:0016021
CBU_0909	221924	NP_819924.1	29654232	7195	858493	859107	+	858873	858922	Spotted	TATTCAGGCCATATTGGAACAACTGCAAGAGCCATTGATGAATGTCACTT	645		-	10	10	0	0	0	0	0	1	0	116	70	17	6	0	295	295	168.085	CBU_0909	Sua5/YciO/YrdC/YwlC family protein (NCBI)	9	J	Putative translation factor (SUA5)
CBU_0910	221925	NP_819925.1	29654233	7195	859205	860179	+	859581	859632	Spotted	AGATGAATCTCACGCCTAGCCAATTTGATCTAACCATTTTAAACGATTTATT	646		-	8	4	0	4	0	0	0	0	0	24	8	2	0	0	213	213	142.761	CBU_0910	hypothetical protein (NCBI)	2334	R	Putative homoserine kinase type II (protein kinase fold)
CBU_0911	221926	NP_819926.2	215919066	7195	860325	860182	-	860214	860256	Spotted	ATTGCTGGCAACAATGCTTTACCTTCTCCCGCTTTCCTTTATG	647		-	2	2	0	0	0	0	0	0	0	8	7	0	0	0	346	346	75.53	CBU_0911	hypothetical protein (RefSeq)
CBU_0912	221927	NP_819927.1	29654235	7195	862043	860619	-	860634	860683	Spotted	ATCGTGAGAAATTGGAAGAGATGACAGTGAATGATTTTGTGGATATCGTC	648	140	operon	10	10	0	1	1	0	2	6	0	45	24	7	3	2	261	261	214.656	prpD	2-methylcitrate dehydratase (NCBI)	2079	R	Uncharacterized protein involved in propionate catabolism	GO:0019629,GO:0047547,GO:0051537	4.2.1.79	2-methylcitrate dehydratase.
CBU_0913	221928	NP_819928.1	29654236	7195	862518	862045	-	862113	862162	Spotted	TATTGGTAAGAGCACGCAAGTATGGGGCATTGAAATTTTCGATGAAAAGG	648	140	operon	10	10	0	0	0	0	0	0	0	49	23	7	1	0	243	243	168.226	CBU_0913	hypothetical protein (NCBI)	2050	Q	Uncharacterized protein, possibly involved in aromatic compounds catabolism
CBU_0914	221929	NP_819929.1	29654237	7195	863872	862757	-	862985	863036	Spotted	TGCGGTTTGGAAAACAGTAGTGACGCTTTTATCAGTGATTAGAATAGTTAAT	649	141	operon	5	5	0	0	0	0	0	0	0	7	6	2	1	0	468	468	226.866	CBU_0914	hypothetical protein (NCBI)
CBU_0915	221930	NP_819930.1	29654238	7195	864383	863874	-	863971	864020	Spotted	AATTGTGAAAATGTCATTAATCTTTGCCAATATAACCGAGCAAAGTTCGC	649	141	operon	4	4	0	0	0	0	0	0	0	7	7	2	1	0	468	468	204.369	CBU_0915	hypothetical protein (NCBI)
CBU_0916	221931	NP_819931.1	29654239	7195	864577	865344	+	865220	865269	Spotted	CGCTTGAGGTAGATAGAATCTATTACCGTGGATTAAAATTGCTTAGCGGT	650		-	10	10	0	2	0	0	0	0	0	59	33	7	1	0	275	275	153.129	CBU_0916	endonuclease/exonuclease/phosphatase family (NCBI)	3568	R	Metal-dependent hydrolase
CBU_0917	2210022			7195	865363	866567	+					651		-	0	0	0	0	0	0	0	0	0									CBU_0917
CBU_0918	221932	NP_819932.1	29654240	7195	866870	868639	+	868503	868554	Spotted	CACTAAATCAATCAAAACTAACTGATCTCTCTCAAGACAGGCTTTCTACCAA	652		-	4	4	2	1	0	0	0	0	2	37	12	3	1	1	216	216	173.772	CBU_0918	hypothetical protein (NCBI)
CBU_0919	2210023			7195	870022	868879	-					653		-	0	0	0	0	0	0	0	0	0									CBU_0919
CBU_0920	221933	NP_819933.1	29654241	7195	870210	871325	+	871144	871193	Spotted	GGCTGGAAGAACTTGAAAAGAGTTATTTAGCATTGAAAGAGGCGCAATTT	654		-	8	7	0	0	0	1	0	1	0	57	23	5	1	0	220	220	146.933	CBU_0920	fatty acid desaturase family protein (NCBI)	1398	I	Fatty-acid desaturase	GO:0006633,GO:0016020,GO:0005783,GO:0004768,GO:0005506
CBU_0921	221934	NP_819934.1	29654242	7195	871356	871670	+	871480	871522	Spotted	TTTTAAGACAGTGGGAATACGATGCCCGAGAATTGATGGTCGC	655		-	1	1	0	0	0	0	0	0	0	1	1	1	1	0	753	753	#DIV/0!	CBU_0921	hypothetical protein (NCBI)
CBU_0922	221935	NP_819935.1	29654243	7195	872931	871618	-	871815	871864	Spotted	ATTAGCAGCAACCGTAGTGGCTTTAATTAATACGGGCGATGCTATTTTCG	656		-	1	1	0	0	0	0	0	0	0	20	1	1	0	0	169	169	107.412	CBU_0922	major facilitator family transporter (NCBI)	2271	G	Sugar phosphate permease	GO:0006810,GO:0016021,GO:0005215
CBU_0923	221936	NP_819936.1	29654244	7195	873052	874182	+	873998	874047	Spotted	TGCGATTGAATTTAAGCCCGCTGGTTATTTTATTATCTCTCGCGTTTTGG	657		-	10	10	0	1	0	0	0	0	0	77	30	7	0	0	216	216	131.701	CBU_0923	transporter, putative (NCBI)	628	R	Predicted permease
CBU_0924	221937	NP_819937.1	29654245	7195	874845	874177	-	874270	874319	Spotted	GTCAAGTAGCCGATGAAGAAAATCAGAGTGAAAACAACCAGCTTATCCGA	658	142	operon	10	5	0	0	0	0	5	0	0	150	91	31	7	1	298	298	186.872	CBU_0924	O-methyltransferase (NCBI)	4122	R	Predicted O-methyltransferase	GO:0008171	2.1.1.-
CBU_0925	221938	NP_819938.1	29654246	7195	875848	874847	-	874888	874937	Spotted	TAATGTCTTGATGAAATGGAACCGATCGACGTATTATGCAGGAACCGTAG	658	142	operon	10	10	0	0	0	0	0	0	0	85	39	9	1	0	235	235	147.574	CBU_0925	lytic murein transglycosylase, putative (NCBI)	2951	M	Membrane-bound lytic murein transglycosylase B		2.4.-.-
CBU_0926	221939	NP_819939.1	29654247	7195	876842	875949	-	876270	876319	Spotted	ATATGCTTTTAGGAATATCGATGATTGCAGTAAGCGAAGCCTTTGTTTTG	659	143	operon	10	10	1	0	0	0	2	1	0	104	59	15	3	2	267.5	267.5	173.325	mmsB	3-hydroxyisobutyrate dehydrogenase (NCBI)	2084	I	3-hydroxyisobutyrate dehydrogenase and related beta-hydroxyacid dehydrogenases	GO:0006098,GO:0006573,GO:0004616,GO:0051287,GO:0008442	1.1.1.31	3-hydroxyisobutyrate dehydrogenase.
CBU_0927	221940	NP_819940.1	29654248	7195	878348	876852	-	877191	877240	Spotted	TTGATCACGTCAAACCGTCAATGCGTATCTATCAAGAAGAGATTTTCGGC	659	143	operon	10	9	0	0	0	0	5	2	0	97	47	14	6	4	240	240	201.115	mmsA	methylmalonate-semialdehyde dehydrogenase (NCBI)	1012	C	NAD-dependent aldehyde dehydrogenases	GO:0006573,GO:0004491	1.2.1.27	Methylmalonate-semialdehyde dehydrogenase (acylating).
CBU_0928	221941	NP_819941.1	29654249	7195	878970	878380	-	878461	878510	Spotted	AATTTTGGGGTGGATTTCGTTTAATTCCCGATCGTATGGAATTTTGGGTG	660		-	10	9	0	0	0	0	1	2	0	114	75	24	6	1	316	316	178.784	pdxH	pyridoxamine 5'-phosphate oxidase (NCBI)	259	H	Pyridoxamine-phosphate oxidase	GO:0008615,GO:0004733,GO:0010181	1.4.3.5	Pyridoxal 5'-phosphate synthase.
CBU_0929	221942	NP_819942.1	29654250	7195	879837	878992	-	879138	879189	Spotted	CGTTTTACATTGCCCTCGACTATTGTAGCTTATAAAATTTATCAAGGCGTTA	661	144	operon	9	9	0	1	0	0	0	0	0	85	17	6	3	0	189	189	157.094	CBU_0929	oxidoreductase, short-chain dehydrogenase/reductase family (NCBI)	300	R	Short-chain dehydrogenases of various substrate specificities	GO:0008152,GO:0016491
CBU_0930	221943	NP_819943.1	29654251	7195	880507	879827	-	879828	879879	Spotted	GGCAAGAAGGAAAAGATTATTTCATTATGCCTTCCAAAACGGATGAGTTATA	661	144	operon	10	10	0	0	0	0	0	0	0	47	24	7	3	0	272	272	190.295	CBU_0930	3-methyladenine DNA glycosylase (NCBI)	2094	L	3-methyladenine DNA glycosylase	GO:0006284,GO:0003677,GO:0003905	3.2.2.-,3.2.2.21	,DNA-3-methyladenine glycosylase II.
CBU_0931	221944	NP_819944.2	215919067	7195	881993	880491	-	880678	880727	Spotted	TATGCCAGCCATTATGGAACGTTAATGAACTGTCTTTTAGAAAGCGCGAC	661	144	operon	10	9	0	0	0	2	2	5	0	113	63	10	4	1	265	265	162.406	glpD	glycerol-3-phosphate dehydrogenase (RefSeq)	578	C	Glycerol-3-phosphate dehydrogenase	GO:0006072,GO:0009331,GO:0004368	1.1.5.3,1.1.99.5	,Glycerol-3-phosphate dehydrogenase.
CBU_0932	221945	NP_819945.2	215919068	7195	882060	883604	+	882952	883001	Spotted	TGTTAGCTACCATTGCTTACCGTCTTAATGACACAGTGACTTATGGGCTC	662		-	10	10	0	0	0	0	1	3	0	131	78	22	1	1	291	291	166.754	gplK	glycerol kinase (RefSeq)	554	C	Glycerol kinase	GO:0005975,GO:0006072,GO:0004370	2.7.1.30	Glycerol kinase.
CBU_0933	221946	NP_819946.1	29654254	7195	884346	883573	-	883693	883744	Spotted	CGTTTCTTATGTAAACCCGGTCAGTTATATTATCGACAATTTTCGTTATGGG	663	145	operon	10	10	0	1	0	0	0	0	0	124	78	15	3	1	299	299	156.776	CBU_0933	ABC transporter, permease protein (NCBI)	1682	GM	ABC-type polysaccharide/polyol phosphate export systems, permease component	GO:0006810,GO:0016020,GO:0005524,GO:0042626
CBU_0934	221947	NP_819947.1	29654255	7195	885261	884347	-	884352	884403	Spotted	AATAAGGCTAACCGATTAGAAGAATTATTTATCAAATTAACGACCGCGGGAA	663	145	operon	9	9	0	2	0	0	0	0	0	102	34	2	2	1	204.5	204.5	129.248	CBU_0934	ABC transporter, ATP-binding protein (NCBI)	1131	V	ABC-type multidrug transport system, ATPase component	GO:0005524,GO:0016887
CBU_0935	221948	NP_819948.1	29654256	7195	885656	885267	-	885282	885331	Spotted	TACAAGGACGATCTTTAGTGGTTCGGATTGCTAAATCAAGAGAGCAGCAA	663	145	operon	3	3	0	0	0	0	0	0	0	6	3	2	2	0	366.5	366.5	310.015	CBU_0935	RNA-binding protein (NCBI)				GO:0000166,GO:0003676
CBU_0936	221949	NP_819949.1	29654257	7195	886418	885849	-	885973	886022	Spotted	TCTGGCATTAATTTGTCAAATACCCACAGTGAAATTTTACCTTATGGTGG	664		-	4	3	0	1	0	0	0	0	0	27	10	0	0	0	193	193	111.472	CBU_0936	ompA-like transmembrane domain protein (NCBI)				GO:0009279,GO:0016021
CBU_0937	221950	NP_819950.2	215919069	7195	886730	888181	+	887821	887870	Spotted	TAGCGCTCTGAAGAGCTTTGATATCAATGATGTCAACTTTGCAAACCGAG	665		-	4	0	0	4	0	0	0	0	0	49	12	2	0	0	203	203	97.863	CBU_0937	hypothetical protein (RefSeq)
CBU_0937a	5437846			7195	888734	888219	-					666		-	0	0	0	0	0	0	0	0	0									CBU_0937a
CBU_0939	221951	NP_819951.2	215919070	7195	889062	890588	+	890145	890196	Spotted	CAGAATGGGACTATTTTGGGTATTAATATTAATGAGTTTCTTGCACAAGCCA	667	146	operon	2	2	0	0	0	0	0	0	0	35	8	2	2	0	200	200	163.576	CBU_0939	AsmA family protein (RefSeq)	2982	M	Uncharacterized protein involved in outer membrane biogenesis
CBU_0940	221952	NP_819952.1	29654260	7195	890594	891658	+	891609	891658	Spotted	CGGTAGCCCGTTTATTGAAACAATTAACTCAACAGACTGCTGTGTTATGA	667	146	operon	10	7	0	0	0	1	1	7	0	156	106	26	6	1	308	308	167.836	mutY	A/G-specific adenine glycosylase (NCBI)	1194	L	A/G-specific DNA glycosylase	GO:0006284,GO:0005622,GO:0004519,GO:0043565,GO:0051539,GO:0019104	3.2.2.-
CBU_0941	221953	NP_819953.1	29654261	7195	891655	891927	+	891800	891849	Spotted	TTATTAACGAGTATCGCCTAAGCCTCATTGACCCTAAAGCCCGTCAATTC	667	146	operon	10	9	0	3	0	0	0	1	0	103	65	12	2	0	309	309	160.824	CBU_0941	hypothetical protein (NCBI)	2924	CO	Fe-S cluster protector protein
CBU_0942	221954	NP_819954.1	29654262	7195	892312	891929	-	892109	892158	Spotted	CAGGGGAGCCTTATTGTTTAAATTTTGATAATGTTTCTTGCGTGCCGCTG	668		-	1	1	0	0	0	0	0	0	0	1	1	1	0	0	637	637	#DIV/0!	CBU_0942	hypothetical protein (NCBI)
CBU_0943	221955	NP_819955.2	215919071	7195	892388	892828	+	892672	892723	Spotted	AGACAAAGAAAAGACGAATATTATTTATTGCTATTCACAAGTCTGCCACCTC	669		-	2	2	0	0	0	0	0	0	0	14	5	2	0	0	237.5	237.5	158.98	CBU_0943	rhodanese-like domain-containing protein (RefSeq)	607	P	Rhodanese-related sulfurtransferase	GO:0008272,GO:0004792
CBU_0944	221956	NP_819956.1	29654264	7195	893417	893316	-	893367	893401	Spotted	ATAAAAGCATCGCGTGCCATTTGAGCGGTGGAAGG	670		-	1	1	0	0	0	0	0	0	0	2	2	0	0	0	399.5	399.5	95.4594	CBU_0944	hypothetical protein (NCBI)
CBU_0945	221957	NP_819957.1	29654265	7195	894629	893658	-	893690	893741	Spotted	AAGAACTTATGCTGGGGTATCGGTAATAAAGTATACGATTTTATCCAACCTT	671		-	2	2	0	0	0	0	0	0	0	2	2	1	0	0	515	515	67.8823	CBU_0945	hypothetical protein (NCBI)
CBU_0946	221958	NP_819958.1	29654266	7195	895740	894754	-	895001	895052	Spotted	CCATTCAAGGAATTATTGGGAATATATTTCAGTCGTTTGGTAAGAAGGATCT	672		-	3	3	0	0	0	0	0	0	0	24	13	2	0	0	269	269	123.983	CBU_0946	hypothetical protein (NCBI)				GO:0000074
CBU_0946a	5437847			7195	896913	896129	-					673		-	0	0	0	0	0	0	0	0	0									CBU_0946a
CBU_0948	221959	NP_819959.1	29654267	7195	897282	897737	+	897675	897726	Spotted	ATGGGTAAAGATCTCTTAGAAATATCTTGGGATAGGTTTCAGCAAAAGTTGA	674		-	0	0	0	0	0	0	0	0	0									CBU_0948	hypothetical protein (NCBI)
CBU_0949	221960	NP_819960.1	29654268	7195	898245	897877	-	897892	897943	Spotted	GCAAATTCAATTAGTAACACATGCAATTAAATTTCAACACCCTGATGCCAAA	675		-	2	2	0	2	0	0	0	0	0	13	3	2	1	0	186	186	218.675	CBU_0949	hypothetical protein (NCBI)
CBU_0950	2210028			7195	901548	898306	-					676	147	operon	0	0	0	0	0	0	0	0	0									CBU_0950
CBU_0951	2210029			7195	902334	901545	-					676	147	operon	0	0	0	0	0	0	0	0	0									CBU_0951
CBU_0952	221961	NP_819961.1	29654269	7195	903234	902551	-	902812	902863	Spotted	AGCCGGACAACAATATAAAATTCAGAACGTTGATTTTGAACCTAGTTTAGTA	677		-	4	4	0	0	0	0	0	0	0	15	10	3	0	0	326	326	142.994	CBU_0952	hypothetical protein (NCBI)
CBU_0953	221962	NP_819962.2	215919072	7195	904648	903323	-	903323	903372	Spotted	TTGCTGTTGGACTTGCTTGGAAATATTTTATGGCTCGTTTATGGATATGA	678		-	7	7	0	0	0	0	0	0	0	57	21	3	0	0	225	225	124.55	CBU_0953	amino acid permease (RefSeq)	531	E	Amino acid transporters	GO:0006865,GO:0016020,GO:0015171
CBU_0954	221963	NP_819963.1	29654271	7195	905431	904685	-	904739	904788	Spotted	GCGAGATAGAATTAAATGATGGTGAATTGGAATCCGCAGGATGGTACGAT	679	148	operon	10	10	0	0	0	0	0	0	0	67	41	12	1	0	319	319	159.559	CBU_0954	MutT/nudix family protein (NCBI)	2816	L	NTP pyrophosphohydrolases containing a Zn-finger, probably nucleic-acid-binding	GO:0000210,GO:0016787	3.6.1.22,3.6.1.-	NAD(+) diphosphatase.,
CBU_0955	221964	NP_819964.1	29654272	7195	906103	905450	-	905456	905505	Spotted	AATTAGCTGTTCAATATGGGTTGATTGACATCGATAAAACCACCAGCGCC	679	148	operon	5	5	0	0	0	0	0	0	0	17	5	3	1	0	185	185	198.952	CBU_0955	DNA-binding response regulator, LuxR family (NCBI)	2197	TK	Response regulator containing a CheY-like receiver domain and an HTH DNA-binding domain	GO:0006355,GO:0000160,GO:0005622,GO:0000156,GO:0043565,GO:0003700
CBU_0956	221965	NP_819965.1	29654273	7195	906902	906240	-	906382	906431	Spotted	AGGTTAAAGAACAAGGTCTGCTACAGTATTGAGGAAGTGGAAACAGGCTC	680		-	4	4	0	0	0	0	0	0	0	5	5	3	0	0	508	508	109.391	CBU_0956	hypothetical protein (NCBI)
CBU_0957	221966	NP_819966.1	29654274	7195	907098	908342	+	908289	908340	Spotted	TCACCAATTCTATTAAAACGAACAAAACGGTTTATTCGATGGTTAGGACTTT	681		-	5	2	0	3	0	0	0	0	0	31	10	1	0	0	195	195	113.985	CBU_0957	hypothetical protein (NCBI)
CBU_0958	2210030			7195	912265	908331	-					682		-	0	0	0	0	0	0	0	0	0									CBU_0958
CBU_0959	221967	NP_819967.1	29654275	7195	913529	912300	-	912352	912403	Spotted	GCGTGATTCCTTTATTAACGAGCTATCTAGGATTAATCGCTTTTAGTCTGAT	683		-	2	2	0	0	0	0	0	0	0	21	4	2	0	0	179	179	134.6	CBU_0959	drug resistance transporter, Bcr/CflA family (NCBI)	2814	G	Arabinose efflux permease	GO:0006810,GO:0016021,GO:0005215
CBU_0960	221968	NP_819968.1	29654276	7195	913674	914225	+	913759	913808	Spotted	GTAAGTCCATGATTTGTAAGATCGAATCCACCGAAGTGCAGCCAACTTTG	684	149	operon	4	4	0	1	0	0	0	0	0	33	15	3	1	0	236	236	152.519	CBU_0960	DNA-binding protein (NCBI)	1476	K	Predicted transcriptional regulators	GO:0043565
CBU_0961	221969	NP_819969.2	215919073	7195	914235	914408	+	914281	914330	Spotted	TTTCTTGTGATCAATGTAATACGCAAATTTCACTTTTGACTGCTCTGACT	684	149	operon	2	2	0	0	0	0	0	0	0	2	2	2	1	0	712.5	712.5	154.856	CBU_0961	hypothetical protein (RefSeq)
CBU_0962	221970	NP_819970.1	29654278	7195	915117	914419	-	914578	914627	Spotted	TAACAAAATCTTTGGCCATCGATTTGAAGCGAAGAGGTATTACGGTGATT	685	150	operon	7	7	0	0	0	0	0	0	0	62	23	5	1	0	260.726	212.5	136.681	CBU_0962	oxidoreductase, short chain dehydrogenase/reductase family (NCBI)	300	R	Short-chain dehydrogenases of various substrate specificities	GO:0008152,GO:0016491
CBU_0963	221971	NP_819971.2	215919074	7195	915641	915117	-	915173	915222	Spotted	TATTGAACGCACGACTTTTCTTATTGATGAAGAAGGGGTGATTTCGGCTG	685	150	operon	10	10	0	0	0	0	0	1	0	176	105	23	2	0	324.506	293	151.805	bcp	antioxidant, AhpC/TSA family (RefSeq)	1225	O	Peroxiredoxin	GO:0051920	1.11.1.15	Peroxiredoxin.
CBU_0964	221972	NP_819972.2	215919075	7195	915645	916556	+	916290	916341	Spotted	CGCAGCCTTTACGATCATTACATGCTTAAAATTCACAATACCATGAAAGGCG	686		-	8	8	0	0	0	0	0	0	0	38	20	4	0	0	285.658	257	135.277	CBU_0964	hypothetical protein (RefSeq)
CBU_0964a	5437848	YP_002332977.1	215919076	7195	916841	917029	+					687	151	operon	0	0	0	0	0	0	0	0	0									CBU_0964a	hypothetical protein (RefSeq)
CBU_0965	221973	NP_819973.1	29654281	7195	917026	918591	+	918482	918531	Spotted	CATTGGCCGTGGTAGAAATTTACTTAATGGTCAAATACATCCGTCTGGGG	687	151	operon	10	1	1	1	1	1	10	4	0	73	23	18	18	4	375.219	212	305.175	cydA-2	cytochrome d ubiquinol oxidase, subunit I (NCBI)	1271	C	Cytochrome bd-type quinol oxidase, subunit 1	GO:0006118,GO:0016020,GO:0016491	1.10.3.-
CBU_0966	221974	NP_819974.1	29654282	7195	918588	919721	+	919630	919681	Spotted	CGATTATTTTATTTTACACAACCGTTGTCTATCGTATATTACGGGGCAAAGT	687	151	operon	10	2	2	2	2	2	10	2	0	116	71	21	18	0	367.078	278	246.789	cydB	cytochrome d ubiquinol oxidase, subunit II (NCBI)	1294	C	Cytochrome bd-type quinol oxidase, subunit 2	GO:0006118,GO:0016020	1.10.3.-
CBU_0967	221975	NP_819975.2	215919077	7195	919732	919836	+	919784	919835	Spotted	CCATTCTTAACGCATTATGGTTTGAATTAGAGCGCTATAAAGACAAAAGCTA	687	151	operon	2	2	0	0	0	0	0	0	0	8	4	2	2	0	385.75	252	303.306	ybgT	cyd operon protein YbgT (RefSeq)
CBU_0968	221976	NP_819976.1	29654284	7195	920495	919965	-	920005	920054	Spotted	TTAATTATTCATAATAAAACGTTGGCCCACCGATACCTTGCTAATTGGTA	688		-	6	6	0	0	0	0	0	0	0	38	17	5	0	0	281.132	217	145.326	CBU_0968	hypothetical protein (NCBI)				GO:0008152,GO:0003824
CBU_0969					920555	920606		920555	920606	Spotted	TGCTCTCGCAAATAAAAATGATTATCATTCGCGTTAATCAATTATCAGGAGT	689		-	0	0	0	0	0	0	0	0	0
CBU_0970	221978	NP_819978.1	29654286	7195	920613	921668	+	921584	921633	Spotted	AATTGGCAATCCAAATGTTAATACAGAAAATGAAGATGTAGAGGCTGCTG	690		-	1	1	0	0	0	0	0	0	0	1	1	1	0	4	647	647	#DIV/0!	CBU_0970	hypothetical protein (NCBI)
CBU_0971	221979	NP_819979.1	29654287	7195	922708	921665	-	921830	921879	Spotted	AAGTGGTTAAACAGTTGCATTCTTTTCTTGGCGATGAGATTCCCATCGTT	691	152	operon	10	9	0	2	5	0	3	6	0	184	132	46	8	2	387.125	338	189.2	pyrD	dihydroorotate dehydrogenase (NCBI)	167	F	Dihydroorotate dehydrogenase	GO:0006207,GO:0006222,GO:0016020,GO:0004152,GO:0004158	1.3.3.1	Dihydroorotate oxidase.
CBU_0972	221980	NP_819980.1	29654288	7195	923397	922705	-	922726	922775	Spotted	AAGTCCCCTATAAATTACAAAGAGGGAATAACGCCATGTTACGGTTGTGG	691	152	operon	9	8	0	1	0	0	0	0	0	40	17	5	1	0	297.775	222.5	170.554	CBU_0972	hypothetical protein (NCBI)
CBU_0973	221981	NP_819981.1	29654289	7195	923486	924649	+	924252	924301	Spotted	GATTAATGCAAGCGTGTCTTGATACGGTTTTACCTTACGTTCATGAGCGC	692	153	operon	10	9	0	4	0	0	8	7	0	86	44	18	12	0	370.767	257	262.259	CBU_0973	acyl-CoA dehydrogenase (NCBI)	1960	I	Acyl-CoA dehydrogenases	GO:0006118,GO:0008470,GO:0050660,GO:0003995	1.3.99.-,1.3.99.10	,Isovaleryl-CoA dehydrogenase.
CBU_0974	221982	NP_819982.1	29654290	7195	924649	925833	+	925270	925319	Spotted	CATCAACGAGAAACCTTGACTGTGGATCATGATGAAAATGCCATGAAAGC	692	153	operon	10	8	0	1	1	0	9	7	1	101	54	23	19	0	382.119	254	268.624	CBU_0974	acetyl-CoA C-acyltransferase (NCBI)	183	I	Acetyl-CoA acetyltransferase	GO:0003985	2.3.1.9,2.3.1.16	Acetyl-CoA C-acetyltransferase.,Acetyl-CoA C-acyltransferase.
CBU_0975	221983	NP_819983.2	215919078	7195	925858	927522	+	927450	927499	Spotted	ATTGGGATTATGTATTTCTGCGAGTTTAAATGCGCCCATTTCTGAAACGC	692	153	operon	10	10	2	5	1	2	5	5	0	100	61	17	8	4	364.31	324.5	212.094	CBU_0975	acyl-CoA biotin-dependant carboxyltransferase (RefSeq)	4799	I	Acetyl-CoA carboxylase, carboxyltransferase component (subunits alpha and beta)	GO:0004485,GO:0004658,GO:0016874	6.4.1.4	Methylcrotonoyl-CoA carboxylase.
CBU_0976	221984	NP_819984.1	29654292	7195	927542	928312	+	928192	928241	Spotted	CAACGATTTATGCCCGATCACAGAAAACATTGTTTCACAAACAGCTGATC	692	153	operon	10	9	1	6	0	0	6	6	2	113	49	14	9	0	318.035	230	221.025	CBU_0976	enoyl-CoA hydratase/isomerase family protein (NCBI)	1024	I	Enoyl-CoA hydratase/carnithine racemase	GO:0008152,GO:0003824,GO:0004300	4.2.1.17	Enoyl-CoA hydratase.
CBU_0977	221985	NP_819985.1	29654293	7195	928314	930299	+	930177	930226	Spotted	ATTTTAGAGGCAATGAAAATGGAACACACAGTAACAGCACCGAAGGATGG	692	153	operon	10	10	3	2	2	4	5	7	1	75	34	13	8	8	340.12	236	238.811	CBU_0977	biotin carboxylase/biotin carboxyl carrier protein (NCBI)	4770	I	Acetyl/propionyl-CoA carboxylase, alpha subunit	GO:0008152,GO:0004485,GO:0016874,GO:0005524,GO:0009374	6.4.1.4,6.3.4.14	Methylcrotonoyl-CoA carboxylase.,Biotin carboxylase.
CBU_0978	221986	NP_819986.1	29654294	7195	930350	930817	+	930659	930708	Spotted	CCGGTTCTATTGAATTCTCAGACCCTTCGCTTTCTTGAGTCTGAAAATAT	693		-	5	5	0	0	0	0	0	0	0	7	7	3	0	9	531.429	472	140.934	CBU_0978	hypothetical protein (NCBI)
CBU_0979	221987	NP_819987.1	29654295	7195	931150	930848	-	931098	931147	Spotted	AAAAGGGAACCACTTGTTTCAGGGTTTCGTTTTGTTTTGTGCGTTATAGG	694		-	2	2	0	0	0	0	0	0	0	5	4	1	0	6	389.6	368	153.192	CBU_0979	lipoprotein, putative (NCBI)
CBU_0980	221988	NP_819988.1	29654296	7195	931518	931240	-	931387	931436	Spotted	ATATCTACCTCACTCACCCAGCCCATTGGCATAATTATAAGTGTGCTGTC	695		-	3	3	0	0	0	0	0	0	0	5	5	2	0	6	478.4	489	149.574	CBU_0980	lipoprotein, putative (NCBI)
CBU_0981	221989	NP_819989.1	29654297	7195	931661	931753	+	931702	931753	Spotted	ACAAATTCATACAAATCCCCCTATTTTCGATTTTTCCTACTTTAGCGCTTAA	696		-	3	3	0	0	0	0	0	0	0	3	3	2	0	5	583.667	636	104.806	CBU_0981	hypothetical protein (NCBI)
CBU_0982	221990	NP_819990.1	29654298	7195	931822	932904	+	932734	932783	Spotted	TTAGTTGAAGGGAAACAAACCCTCGAATCCGGAAAAGCTTTAACCTATGG	697		-	10	8	0	0	0	0	5	2	0	119	76	24	5	0	351.748	300	183.183	CBU_0982	3-deoxy-7-phosphoheptulonate synthase (NCBI)	722	E	3-deoxy-D-arabino-heptulosonate 7-phosphate (DAHP) synthase	GO:0009073,GO:0003849	2.5.1.54,4.1.2.15	3-deoxy-7-phosphoheptulonate synthase.,Transferred entry: 2.5.1.54.
CBU_0983	2210031			7195	932894	933768	+					698		-	0	0	0	0	0	0	0	0	0									CBU_0983
CBU_0984	221991	NP_819991.1	29654299	7195	933752	934528	+	934393	934442	Spotted	GGATTTAAAACGATTCAACCCTTATGCGGCTCAAACGATCGGTGAATTCA	699		-	9	7	0	2	0	0	1	0	0	37	16	5	2	0	304.973	202	197.823	CBU_0984	prephenate dehydrogenase family protein (NCBI)	287	E	Prephenate dehydrogenase	GO:0006571,GO:0004665,GO:0008977	1.3.1.12	Prephenate dehydrogenase.
CBU_0985	221992	NP_819992.1	29654300	7195	934557	935315	+	935266	935315	Spotted	AAACACAAGAACCCTTAAAACCTCTCCCTTTTGAAGATAGAAGCAAGTGA	700		-	2	2	0	0	0	0	0	0	0	4	3	2	1	0	475.5	450.5	242.666	CBU_0985	hypothetical protein (NCBI)
CBU_0986	221993	NP_819993.2	215919079	7195	936184	935372	-	935414	935463	Spotted	GTGGGAGTGTTGAAAGTTTAAATGTTTCTGTAGCTTGTGGGATTTGTTTG	701		-	10	10	0	0	0	1	0	0	0	247	176	61	5	0	376.935	346	168.01	CBU_0986	RNA methyltransferase (RefSeq)	566	J	rRNA methylases	GO:0009451,GO:0006396,GO:0003723,GO:0008173	2.1.1.-
CBU_0987	221994	NP_819994.2	215919080	7195	936218	937015	+	936473	936522	Spotted	AAATTCCATGGTCAATTAACGTCCACCCGTGAACCTTACAATATGCTAGC	702	154	operon	10	10	0	0	0	2	0	1	0	159	95	37	3	1	352.308	279	185.314	CBU_0987	rare lipoprotein A (RefSeq)	797	M	Lipoproteins
CBU_0988	221995	NP_819995.1	29654303	7195	937019	937708	+	937454	937503	Spotted	TTTACTGATAAAGTGATCGAAAGTTTAAATGATCACCCCGAGGGAATTGT	702	154	operon	10	9	0	0	0	1	0	4	0	205	141	54	5	0	377.073	334	179.948	ung	uracil-DNA glycosylase (NCBI)	692	L	Uracil DNA glycosylase	GO:0006284,GO:0004844	3.2.2.-
CBU_0989	221996			7195	940879	937710	-	937730	937772	Spotted	TATCGCTGGTTGGAAGAGCGTTCAGAATGTCAGATGCAAGAAG	703		-	3	0	3	0	0	0	0	0	0	3	3	3	2	0	778.667	795	29.1605	CBU_0989	hypothetical protein (RefSeq)
CBU_0990					937937	937986		937937	937986	Spotted	GATTTATTTATTGAAAGCTTATATAGAGGAGCGCAAATGCATTGTGGAGC	704		-	4	3	3	0	0	0	0	0	0	7	4	3	3	0	547.857	470	341.793
CBU_0991					939868	939919		939868	939919	Spotted	ACAAGGTTATATATGTATACAGCAACCTCAGAATTTGTTGGAATGTGCTTTA	704		-	4	3	3	0	0	0	0	0	0	4	4	3	2	0	773.25	830	222.753
CBU_0992					940483	940534		940483	940534	Spotted	TCCGGATTCCATATTCGTGTCCACCTTATTTACGTTCTAATCTCTTTACTAA	704		-	4	3	3	0	0	0	0	0	0	4	4	4	3	1	803.5	855	165.941
CBU_0993	222000	NP_820000.1	29654308	7195	941108	941620	+	941276	941325	Spotted	AAACACATTACGGTCATCGACTTTTCTCCCAATAAAGATCAGCCTTTGTG	705		-	10	10	0	1	2	1	0	0	0	208	129	49	13	0	359.712	303.5	184.497	def	peptide deformylase (NCBI)	242	J	N-formylmethionyl-tRNA deformylase	GO:0006412,GO:0042586,GO:0005506	3.5.1.88	Peptide deformylase.
CBU_0994	222001	NP_820001.1	29654309	7195	941798	941691	-	941696	941725	Spotted	CGCCAGATTCCCCTTGCGTGGATGACGAAG	706		-	3	3	0	0	0	0	0	0	0	3	3	3	0	2	620.667	630	16.1658	CBU_0994	hypothetical protein (NCBI)
CBU_0995	222002	NP_820002.2	215919081	7195	941938	942222	+	942103	942154	Spotted	CGTCTCAGCGTTGAAATTTTCTGGACTATTATTCCTTTTATCATACTCGTCA	707	155	operon	4	4	0	1	0	0	0	0	0	12	9	4	2	2	415.667	322.5	257.474	CBU_0995	putative cytochrome c oxidase, membrane subunit (RefSeq)				GO:0006118,GO:0016021,GO:0004129,GO:0009482,GO:0020037,GO:0005507,GO:0009483,GO:0009485,GO:0009481	1.9.3.1	Cytochrome-c oxidase.
CBU_0996	222003	NP_820003.1	29654311	7195	942219	943136	+	943087	943136	Spotted	CTGCCCTGCTTGTCGATCATTATGTGTATCTGGCGCTAAAACTTTATTAA	707	155	operon	10	8	0	3	2	0	4	5	0	88	49	16	6	2	347.011	263	207.314	ctaB	protoheme IX farnesyltransferase (NCBI)	109	O	Polyprenyltransferase (cytochrome oxidase assembly factor)	GO:0006783,GO:0016021,GO:0008495	2.5.1.-
CBU_0997	222004	NP_820004.2	215919082	7195	943145	943261	+	943152	943201	Spotted	AACGTTTTCTGGTGATTTTGTTAACTTGTTTATTTGTCATCGGCTGTTCG	707	155	operon	3	3	0	0	0	0	0	0	0	5	4	3	2	1	558.8	602	281.278	CBU_0997	putative lipoprotein (RefSeq)
CBU_0998	222005	NP_820005.1	29654313	7195	944601	943294	-	943476	943525	Spotted	TCAATCGTTATTAGAATCGTGTGAACCTGTATATGAAGAAATGCCGGGTT	708		-	10	8	0	3	1	0	10	3	0	250	153	75	16	0	390.748	325.5	212.388	purA	adenylosuccinate synthetase (NCBI)	104	F	Adenylosuccinate synthase	GO:0006164,GO:0004019,GO:0005525	6.3.4.4	Adenylosuccinate synthase.
CBU_0999	222006	NP_820006.2	215919083	7195	945986	944622	-	944732	944781	Spotted	CGAAGGCCACATCCAATTGACGCTCGAAATTCAACGAAAAGATTATCAAC	709	156	operon	10	10	0	0	6	0	0	2	0	186	108	32	4	1	335.242	283	169.606	hflX	GTP-binding proten HflX (RefSeq)	2262	R	GTPases	GO:0005622,GO:0005525
CBU_1000	222007	NP_820007.1	29654315	7195	946684	945983	-	946018	946067	Spotted	TAATCGTGAATTTGCCGACAAGATGGACCGTGTATTGCTATTAGACAAGG	709	156	operon	9	9	1	4	0	0	0	1	0	92	30	7	2	5	253.185	190.5	152.558	CBU_1000	lipoprotein ABC transporter, ATP-binding protein LolD (NCBI)	1136	V	ABC-type antimicrobial peptide transport system, ATPase component	GO:0006810,GO:0016020,GO:0005524,GO:0016887	3.6.3.-
CBU_1001	222008	NP_820008.1	29654316	7195	947921	946677	-	946719	946768	Spotted	TTATTGCATTCGCTTTAAGTTTAATTGCAACAATTTATCCGGCGTTCATC	709	156	operon	10	10	0	3	0	0	0	0	0	187	113	46	3	0	360.15	306	181.524	CBU_1001	lipoprotein ABC transporter, permease protein, putative (NCBI)	4591	M	ABC-type transport system, involved in lipoprotein release, permease component	GO:0006810,GO:0009276,GO:0016021
CBU_1002	222009	NP_820009.1	29654317	7195	948044	949015	+	948919	948968	Spotted	AAGCTTGGGAATTAATCCACAGGGTTATTTAACCGTCCAACTCTCAGATG	710		-	10	10	2	2	0	0	0	5	0	201	125	40	5	11	346.204	299	171.124	birA	birA bifunctional protein (NCBI)	340	H	Biotin-(acetyl-CoA carboxylase) ligase	GO:0006464,GO:0004077	6.3.4.15	Biotin--[acetyl-CoA-carboxylase] ligase.
CBU_1003	222010	NP_820010.1	29654318	7195	949671	948943	-	948956	949005	Spotted	AAAGTCGTGTCGCCAGAAGAGAATATTCGTTCAGAACCATCTGAGAGTTG	711	157	operon	10	10	1	4	1		2	9	0	135	85	17	8	0	344.578	305	186.657	bioD	dethiobiotin synthetase (NCBI)	132	H	Dethiobiotin synthetase	GO:0009102,GO:0009236,GO:0004141,GO:0042242,GO:0005524	6.3.3.3	Dethiobiotin synthase.
CBU_1004	222011	NP_820011.1	29654319	7195	950414	949668	-	949703	949754	Spotted	TCACCGATGCCAATAGAAAAGAATAATACTGATACAACACTCACTTATCACA	711	157	operon	8	8	0	0	0	0	0	5	0	28	9	8	5	1	359.25	183	304.789	CBU_1004	biotin synthesis protein BioC, putative (NCBI)	2226	H	Methylase involved in ubiquinone/menaquinone biosynthesis	GO:0009102,GO:0008168
CBU_1005	222012	NP_820012.1	29654320	7195	951108	950404	-	950475	950524	Spotted	GCTTGCCGGTTTAAATAAACACTCCGAAATTCATTCACTCCCTAAAGCAG	711	157	operon	10	10	0	0	0	1	0	6	0	43	20	7	5	1	345.023	238	239.43	bioH	bioH protein (NCBI)	596	R	Predicted hydrolases or acyltransferases (alpha/beta hydrolase superfamily)
CBU_1006	222013	NP_820013.1	29654321	7195	952256	951102	-	951102	951151	Spotted	AAACTCAAATCGTGCAACTGCTTGATCGATTGGCTTCGTTGTTATGTTAA	711	157	operon	10	10	0	2	0	0	1	7	0	75	33	8	5	1	302.933	236	206.801	bioF	8-amino-7-oxononanoate synthase (NCBI)	156	H	7-keto-8-aminopelargonate synthetase and related enzymes	GO:0009058,GO:0008710,GO:0016769,GO:0030170	2.3.1.47	8-amino-7-oxononanoate synthase.
CBU_1007	222014	NP_820014.1	29654322	7195	953208	952243	-	952516	952565	Spotted	CCACTAGTATACCAATCAATCAATTAATACCCATTAAAGGAACGCCACTG	711	157	operon	10	10	1	1	2	1	1	8	0	170	111	31	8	5	361.447	304.5	192.2	bioB	biotin synthase (NCBI)	502	H	Biotin synthase and related enzymes	GO:0009102,GO:0004076,GO:0051536	2.8.1.6	Biotin synthase.
CBU_1008	222015	NP_820015.1	29654323	7195	953577	954905	+	954739	954788	Spotted	GTTTAGGCTACGAAGTGTATCAAGAGGCTGTAAAACAAGGGGTATTGCTG	712	158	operon	10	9	2	2	1	0	4	8	0	211	130	35	7	3	342.967	293	173.477	bioA	adenosylmethionine-8-amino-7-oxononanoate aminotransferase (NCBI)	161	H	Adenosylmethionine-8-amino-7-oxononanoate aminotransferase	GO:0009102,GO:0004015,GO:0030170	2.6.1.62	Adenosylmethionine--8-amino-7-oxononanoate transaminase.
CBU_1008a	5437849			7195	954906	955220	+					712	158	operon	0	0	0	0	0	0	0	0	0									CBU_1008a
CBU_1010	222016	NP_820016.2	215919084	7195	955210	955590	+	955531	955580	Spotted	GTAAAACCCGAACATATTATTTTCTGGGAAGCTTATGCCAACGCTAAAGC	713		-	7	5	0	3	0	0	0	0	0	34	11	2	0	3	266.471	213	130.513	CBU_1010	hypothetical protein (RefSeq)	1993	S	Uncharacterized conserved protein
CBU_1011	222017	NP_820017.1	29654325	7195	956825	955641	-	955827	955876	Spotted	AACAAAAGGCAACCAAAATCTGGAAAGAAACAATGTGTTATCCAGGCGAG	714		-	2	1	0	1	0	0	0	0	0	27	7	0	0	5	224.63	203	75.1271	CBU_1011	dioxygenase, putative (NCBI)	3670	Q	Lignostilbene-alpha,beta-dioxygenase and related enzymes
CBU_1012	222018			7195	957249	959440	+	958883	958932	Spotted	AAGGACCTTGACAACGAATCAATTAAAGAAATATTTTCTAACTCCGCGCT	715		-	2	2	1	0	0	0	0	0	0	2	2	1	1	6	649	649	318.198	CBU_1012	hypothetical protein (RefSeq)
CBU_1013					959391	959440		959391	959440	Spotted	CATCAAATACGCTTAAGGAGAACCATCCTGAATTAACAACGGGAGGCTAA	716		-	1	1	1	0	0	0	0	0	0	2	2	1	1	4	564.5	564.5	437.699
CBU_1013a	5437850			7195	960339	959930	-					717		-	0	0	0	0	0	0	0	0	0									CBU_1013a
CBU_1014	222020	NP_820020.1	29654328	7195	960466	960660	+	960529	960580	Spotted	TCTTGCGTTGCAGCATTAGTTATTTCTAACAACCTATACTACCGTATGGTGG	718		-	0	0	0	0	0	0	0	0	0									CBU_1014	hypothetical protein (NCBI)
CBU_1015	222021	NP_820021.1	29654329	7195	961125	961670	+	961527	961576	Spotted	CGAGATCACTTGATTGAATTAGCTGACATGGTTATTGGTGCTATTAGCCG	719		-	1	1	0	0	0	0	0	0	0	2	2	0	0	0	380	380	83.4386	CBU_1015	hypothetical protein (NCBI)
CBU_1016	222022	NP_820022.1	29654330	7195	961969	962121	+	962017	962056	Spotted	TTTGCGGGACTTTACGGGAGCTCCCTTGTGTTTAATTTTA	720		-	2	2	0	0	0	0	0	0	0	2	2	1	0	0	507	507	96.1665	CBU_1016	hypothetical protein (NCBI)
CBU_1017	222023	NP_820023.1	29654331	7195	962236	963378	+	963264	963315	Spotted	TCCTGAAGCAAAATGTTATGTGGTTTATGGTATCCATGAACAAGAGTATAAA	721		-	7	1	0	6	0	0	0	0	3	23	16	4	0	0	358.217	354	173.161	CBU_1017	hypothetical protein (NCBI)	1373	R	Predicted ATPase (AAA+ superfamily)
CBU_1018	222024	NP_820024.1	29654332	7195	963912	963556	-	963586	963635	Spotted	TTTCCTTTAGAAGTTCACTTTGGAAGCGAGTAAAAGGAACCTGGAAAATA	722		-	5	5	0	0	0	0	0	0	0	17	8	2	0	0	293.294	210	161.502	CBU_1018	hypothetical protein (NCBI)	4994	S	Uncharacterized protein conserved in bacteria
CBU_1019	222025	NP_820025.2	215919085	7195	964171	963953	-	964048	964097	Spotted	GTCTCATTCCACTACTATCGACCGTGACCTATTGAGGCTTGTTCAAAAGG	723		-	2	2	0	0	0	0	0	0	0	4	4	1	0	0	483	421.5	167.414	CBU_1019	hypothetical protein (RefSeq)
CBU_1020	222026	NP_820026.1	29654334	7195	964674	964423	-	964600	964651	Spotted	CCATATCATTACCCATAAGTCACAGGCATTTTCCATTTTAAACTTCCTGATC	724		-	4	4	0	0	0	0	0	0	0	4	4	2	0	0	535.25	552	110.536	CBU_1020	hypothetical protein (NCBI)
CBU_1021	222027	NP_820027.1	29654335	7195	964833	965276	+	965122	965171	Spotted	ATGATCCTTCTCCTTGGTTTGAATTCAGTGAAGCTCGTAATCAAGTAGCC	725		-	5	5	0	1	0	0	0	1	0	30	15	3	1	0	292.333	248.5	180.361	CBU_1021	nucleotidyltransferase substrate-binding protein, putative (NCBI)
CBU_1022	222028	NP_820028.1	29654336	7195	965269	965568	+	965465	965516	Spotted	ACTCCGATTTGCCAATTTTAGTTGATATCGTAGACTGGAATACTATTTCTGA	726		-	4	4	0	1	0	0	0	1	0	18	8	3	1	0	325.5	219.5	222.655	CBU_1022	nucleotidyltransferase domain protein (NCBI)				GO:0016779
CBU_1023	222029	NP_820029.2	215919086	7195	966353	967309	+	967193	967242	Spotted	GAAGATAAACTACGAATTGAAATTTCACGAATCTTCCAGCTTTCTGAAGC	727	159	operon	10	8	2	0	0	0	0	5	0	88	48	4	0	0	297.784	274	122.548	CBU_1023	quinone oxidoreductase (RefSeq)	604	CR	NADPH:quinone reductase and related Zn-dependent oxidoreductases	GO:0003960,GO:0008270	1.6.5.5	NADPH:quinone reductase.
CBU_1023a	5437851	YP_002332978.1	215919087	7195	967315	967593	+					727	159	operon	0	0	0	0	0	0	0	0	0									CBU_1023a	hypothetical protein (RefSeq)
CBU_1024	222030			7195	970112	967666	-	967746	967797	Spotted	AGAACTTTGAAGGATTACTTAATAGCAAGAACTCATGCTTTACAGCCTAAAA	728		-	10	1	0	9	0	0	0	0	0	43	22	11	1	0	364.558	286	232.068	CBU_1024	ankyrin repeat domain protein (RefSeq)				GO:0009401,GO:0005351
CBU_1025					970037	970086		970037	970086	Spotted	TATCTTTTCTTCAGGAAGAGGCGATAACATGCGTTCAATTCAAGTTGAAA	729		-	1	1	0	0	0	0	0	0	0	3	3	1	1	1	497.333	326	296.758
CBU_1026					970566	970605		970566	970605	Spotted	ACGTTGTCGCGAAGTTGAGCTTTAGCCTAAGTAAACGAAG	729		-	1	1	0	0	0	0	0	0	0	3	3	1	1	1	504.667	326	315.541
CBU_1027	222033	NP_820033.1	29654341	7195	970617	972008	+	971958	972008	Spotted	CGGCAAATTATCCGAGGATTACTAGGTTCAGTATTCAAAGGAAAGAAATAA	730		-	10	9	0	0	2	0	0	1	0	101	46	11	1	0	282.525	236	133.802	CBU_1027	hypothetical protein (NCBI)	433	R	Predicted ATPase
CBU_1028	222034	NP_820034.1	29654342	7195	972926	972024	-	972590	972639	Spotted	TCGTGATTACGCTACCTTATTTTGTGCTATTTTAAGGCATCATGGCATCC	731		-	1	1	0	0	0	0	0	0	0	3	2	0	0	0	307	275	129.988	CBU_1028	hypothetical protein (NCBI)
CBU_1028a	5437852			7195	974433	973012	-					732		-	0	0	0	0	0	0	0	0	0									CBU_1028a
CBU_1031	222035	NP_820035.2	215919088	7195	974769	975209	+	975102	975151	Spotted	CAAGCTGTGAAGGAAATGCTTAATAGTGAATGGGCCGAAGAAGTGAAAAG	733		-	3	2	0	1	0	0	0	0	0	23	10	1	1	0	267.87	216	159.253	CBU_1031	phage lysozyme (RefSeq)	3772	R	Phage-related lysozyme (muraminidase)	GO:0009253,GO:0016998,GO:0003796	3.2.1.17	Lysozyme.
CBU_1032	222036			7195	975188	976066	+	975241	975290	Spotted	TGAAAATAGCCTCCTAGGTCAAATGCCTTTTTACCTCCCAAAAGTTTTTC	734		-	2	2	0	0	0	0	0	0	0	2	2	1	1	0	683.5	683.5	262.337	CBU_1032	hypothetical protein (RefSeq)
CBU_1033					976001	976050		976001	976050	Spotted	CGTAGTGATTTTGAGAGTAGTTTGGAAAGTTCGAATATGCGCAGCATCAT	735		-	2	2	0	0	0	0	0	0	0	3	2	0	0	0	397.333	498	174.36
CBU_1034	222038	NP_820038.2	215919089	7195	976893	976258	-	976293	976342	Spotted	GATAGCCGCCGTCTTAACCGTCTGGACCATGATCATCTATCTAAAGATTG	736		-	10	9	0	0	0	0	2	2	0	235	145	47	7	0	356.877	304	176.956	pgsA	CDP-diacylglycerol--glycerol-3-phosphate 3-phosphatidyltransferase (RefSeq)	558	I	Phosphatidylglycerophosphate synthase	GO:0008654,GO:0016021,GO:0008444	2.7.8.5	CDP-diacylglycerol--glycerol-3-phosphate 3-phosphatidyltransferase.
CBU_1035	222039	NP_820039.1	29654347	7195	976940	978346	+	978282	978331	Spotted	TCGGTTTAAGCGATGGACTGAATAACAAACGAAACCAATTAATAGAAGCT	737	160	operon	10	7	0	0	0	0	4	1	0	93	51	17	4	0	337.72	266	187.294	CBU_1035	nicotinate phosphoribosyltransferase (NCBI)	1488	H	Nicotinic acid phosphoribosyltransferase	GO:0019363,GO:0004516	2.4.2.11	Nicotinate phosphoribosyltransferase.
CBU_1035b	5437853			7195	978536	980016	+					738		-	0	0	0	0	0	0	0	0	0									CBU_1035b
CBU_1035d	5437854	YP_002332979.1	215919090	7195	980801	980466	-					739	161	operon	0	0	0	0	0	0	0	0	0									cyoD	cytochrome O ubiquinol oxidase protein (RefSeq)	3125	C	Heme/copper-type cytochrome/quinol oxidase, subunit 4	GO:0006118,GO:0016021	1.10.3.-
CBU_1036	2210039			7195	978343	978612	+					740	160	operon	0	0	0	0	0	0	0	0	0									CBU_1036
CBU_1038	222040	NP_820040.1	29654348	7195	981394	980798	-	980846	980897	Spotted	TGCAAGACGAATGGTTTATCTTGGCCTATTTTGGAATTTCTTAGATATTGTT	741	161	operon	10	4	1	3	3	2	10	10	0	83	45	24	19	0	418.108	270	295.669	cyoC	cytochrome o ubiquinol oxidase, subunit III (NCBI)	1845	C	Heme/copper-type cytochrome/quinol oxidase, subunit 3	GO:0006118,GO:0016020,GO:0004129	1.10.3.-
CBU_1039	222041	NP_820041.1	29654349	7195	983397	981391	-	981391	981440	Spotted	AAACCGTCAAGCAAATTGAATTACAGCATTATGAGGAGTCATTAACATGA	741	161	operon	10	3	1	4	7	2	10	9	0	111	65	29	19	0	407.523	300	271.019	cyoB	cytochrome o ubiquinol oxidase, subunit I (NCBI)	843	C	Heme/copper-type cytochrome/quinol oxidases, subunit 1	GO:0006118,GO:0009060,GO:0016021,GO:0005506,GO:0020037	1.10.3.-
CBU_1040	222042	NP_820042.1	29654350	7195	984313	983417	-	983430	983479	Spotted	ATTATGAAATATAAGCAAACGACGGGAATCCCTACGCATTGGGCTATTCC	741	161	operon	10	4	0	2	6	2	10	6	0	75	42	23	19	2	434.933	287	301.898	cyoA	cytochrome o ubiquinol oxidase, subunit II (NCBI)	1622	C	Heme/copper-type cytochrome/quinol oxidases, subunit 2	GO:0006118,GO:0016021,GO:0004129,GO:0005507,GO:0020037,GO:0009486	1.10.3.-
CBU_1041	222043	NP_820043.1	29654351	7195	984476	984321	-	984406	984445	Spotted	TGCTATTGGCTTTAGAGAATATTATCAGTATATTAGTGCG	741	161	operon	4	4	0	0	0	0	0	0	0	4	4	4	3	2	765.5	771	69.6922	CBU_1041	hypothetical protein (NCBI)
CBU_1042	222044	NP_820044.1	29654352	7195	984470	984871	+	984751	984802	Spotted	GCTCATCGAAGAGCATTTAAATAAAATACCTTTTCTCTTTAGCCTCTTTGGA	742		-	4	4	0	0	0	0	0	0	0	4	4	4	0	14	634.5	630	37.108	CBU_1042	hypothetical protein (NCBI)
CBU_1043	222045	NP_820045.1	29654353	7195	985558	984914	-	985387	985436	Spotted	ACTAAGGCGTGACAAAGAACCGGATGTAATTATCCTTGATTTCCAATTAC	743		-	0	0	0	0	0	0	0	0	0	15	0	0	0	16	180.133	178	25.3204	CBU_1043	DNA-binding response regulator, LuxR family (NCBI)	2197	TK	Response regulator containing a CheY-like receiver domain and an HTH DNA-binding domain	GO:0006355,GO:0000160,GO:0005622,GO:0000156,GO:0043565,GO:0003700
CBU_1044	222046			7195	986266	988013	+	986849	986898	Spotted	ACCCTATACCGGAAGAGATTGTTAGTACTATTGATGGATTAGAGGCAGTG	744		-	1	1	1	0	0	0	0	0	0	2	2	1	1	11	631	631	414.365	CBU_1044	hypothetical protein (RefSeq)
CBU_1045					987942	987991		987942	987991	Spotted	TACAGATTTAATAGGGATGGAGACGATGTTCCATTAGAAATAACAGCGCT	745		-	2	2	1	0	0	0	0	0	0	2	2	1	1	0	675.5	675.5	351.432
CBU_1045a	5437855	YP_002332980.1	215919091	7195	988196	988083	-					746		-	0	0	0	0	0	0	0	0	0									CBU_1045a	hypothetical protein (RefSeq)
CBU_1046	222048			7195	988345	990125	+	989609	989659	Spotted	TGTTGAACCTCATTAATCAAAATGCAAACCAATTTTCGTTGGAAGAAAGTA	747		-	1	1	0	0	0	0	0	0	0	2	2	0	0	0	382.5	382.5	62.9325	CBU_1046	hypothetical protein (RefSeq)
CBU_1048	222049			7195	992578	990309	-	990499	990548	Spotted	CTTTCTTTTCTTGCACAAACGCATCCGAACTTTATCCAAGAGGTGCAAAC	748		-	1	1	0	0	0	0	0	0	0	1	1	1	0	0	513	513	#DIV/0!	CBU_1048	hypothetical protein (RefSeq)
CBU_1049					991325	991374		991325	991374	Spotted	ATAAAATGCACCTTAGTGACTTACCGCCCTTTCTATCGCAACTTAGCAGA	749		-	1	1	0	0	0	0	0	0	0	1	1	1	0	1	513	513	#DIV/0!
CBU_1050	222051	NP_820051.1	29654359	7195	993400	993188	-	993330	993379	Spotted	ATCGGTGAATCGGTAATCATTGGAGACGACATCAAGATAACCGTTCTTGG	750	162	operon	10	10	0	0	0	1	0	1	0	66	39	10	1	1	325.47	299	148.615	csrA-2	carbon storage regulator (NCBI)	1551	T	Carbon storage regulator (could also regulate swarming and quorum sensing)	GO:0006109,GO:0016071,GO:0003723
CBU_1051	222052	NP_820052.1	29654360	7195	994769	993540	-	993540	993589	Spotted	GCACGCTCCATTCAGCCTTCAAACTAAACCAAGAAATAAAATTTACTTGA	750	162	operon	10	10	1	2	1	0	4	3	0	186	114	41	17	0	377.656	299.5	211.981	CBU_1051	aspartate kinase (NCBI)	527	E	Aspartokinases	GO:0008652,GO:0004072,GO:0016597	2.7.2.4	Aspartate kinase.
CBU_1052	222053	NP_820053.1	29654361	7195	997372	994775	-	995063	995112	Spotted	TGGATGTACATGACATAAGAACGCTCGCTATTCGATTAGAAGCCGTTGAC	750	162	operon	10	7	0	1	0	0	4	0	0	309	205	72	14	0	373.045	316	188.048	alaS	alanyl-tRNA synthetase (NCBI)	13	J	Alanyl-tRNA synthetase	GO:0006419,GO:0005737,GO:0003676,GO:0004813,GO:0005524	6.1.1.7	Alanine--tRNA ligase.
CBU_1053	222054	NP_820054.1	29654362	7195	997799	997365	-	997385	997434	Spotted	GGTGCGTTTCCTACTGCAACGAGGATTTGATTTAGAACAAATTTATAAAC	750	162	operon	10	10	0	0	0	0	0	1	0	58	30	10	4	0	341.879	276	205.057	recX	recX protein (NCBI)	2137	R	Uncharacterized protein conserved in bacteria	GO:0006282
CBU_1054	222055	NP_820055.1	29654363	7195	998827	997796	-	997998	998047	Spotted	ATTCTTTACGGTCTTGGTATTTCGCGTGAAAGTGAGTTAATTGACCTCGG	750	162	operon	10	10	0	1	0	1	0	8	0	318	242	90	23	0	408.06	358	194.264	recA	recombinase A (NCBI)	468	L	RecA/RadA recombinase	GO:0006281,GO:0006310,GO:0006259,GO:0003677,GO:0003684,GO:0005524,GO:0008094
CBU_1055	222056	NP_820056.1	29654364	7195	999415	998915	-	998920	998970	Spotted	TCGCGTATGCATTGAAATGGTTAATTGAATGTGTGAAAGGGAATAAGAATG	750	162	operon	10	10	0	0	0	0	0	1	0	151	103	29	5	6	366.278	324	171.351	CBU_1055	competence/damage-inducible protein CinA domain protein (NCBI)	1546	R	Uncharacterized protein (competence- and mitomycin-induced)
CBU_1056	222057	NP_820057.2	215919092	7195	999550	1002165	+	1002089	1002140	Spotted	TCAATCCCGATAACCTAACGCCTAAACAAGCTTTAGATATCCTTTATCAATT	751	163	operon	10	8	0	1	0	3	0	8	0	207	126	50	9	4	365.377	318	182.61	mutS	DNA mismatch repair protein (RefSeq)	249	L	Mismatch repair ATPase (MutS family)	GO:0006298,GO:0005737,GO:0003684,GO:0030983,GO:0005524
CBU_1057	222058	NP_820058.1	29654366	7195	1002162	1002905	+	1002453	1002502	Spotted	GACATCCCCAAATTTATTGAAGCCATGAATGAGTATCCCAACCATATTAT	751	163	operon	10	9	1	1	0	0	0	0	1	96	45	11	3	3	294.406	241.5	157.545	CBU_1057	glycosyl transferase, group 2 family protein (NCBI)	463	M	Glycosyltransferases involved in cell wall biogenesis
CBU_1058	222059	NP_820059.1	29654367	7195	1002918	1004204	+	1004144	1004194	Spotted	GCTCTTCTTAAATCAATTGAATTTGGAACAATTAGCGAGGGACTATCGAAA	752		-	10	9	0	2	0	0	0	0	0	30	16	5	2	4	331.833	265.5	194.322	CBU_1058	hypothetical protein (NCBI)	3930	S	Uncharacterized protein conserved in bacteria
CBU_1059	2210044	YP_338282.1	77358718	7195	1004909	1004175	-	1004175	1004224	Spotted	AATCTCCCGAAATCAAATCATTACAAAATATTTCGATAGTCCCTCGCTAA	753	164	operon	10	10	0	3	0	2	0	1	0	302	210	71	13	1	377.742	351	179.374	CBU_1059	pseudouridine synthase family protein (NCBI)	1187	J	16S rRNA uridine-516 pseudouridylate synthase and related pseudouridylate synthases	GO:0001522,GO:0003723,GO:0004730,GO:0016439	5.4.99.12	tRNA-pseudouridine synthase I.
CBU_1060	222060	NP_820060.1	29654368	7195	1005548	1004919	-	1005341	1005390	Spotted	AGAACGAGGAGTGGATTTACAAGAAGTAGCGAGCGGATATCGTTTTCAAG	753	164	operon	10	10	0	2	0	1	0	1	0	197	129	41	9	1	363.807	316	183.997	scpB	segregation and condensation protein B (NCBI)	1386	K	Predicted transcriptional regulator containing the HTH domain
CBU_1061	222061	NP_820061.2	215919093	7195	1006380	1005553	-	1005594	1005643	Spotted	AATTGCTACCTTAGAATTAATTCGTCAATCCGTCATTGAACTCGTGCAAG	753	164	operon	10	9	0	2	0	1	0	1	0	197	122	38	8	1	355.325	300	182.441	scpA	segregation and condensation protein (RefSeq)	1354	S	Uncharacterized conserved protein
CBU_1061a	5437856	YP_002332981.1	215919094	7195	1006431	1007537	+					754		-	0	0	0	0	0	0	0	0	0									CBU_1061a	hypothetical membrane associated protein (RefSeq)
CBU_1062					1007490	1007539		1007490	1007539	Spotted	CATTAAATGGGATATTCATTGTGGAAAGGCAGCGTTACCTTCCGAGCTAG	755		-	1	1	0	0	0	0	0	0	0	1	1	1	0	0	649	649	#DIV/0!
CBU_1063	222063	NP_820063.1	29654371	7195	1007671	1009077	+	1008983	1009032	Spotted	GCCATAATCAATTTACAATCTTTGCCCCATCTAAATCCAGTCGTCATGCT	756		-	1	1	0	0	0	0	0	0	0	4	1	1	0	3	322.25	237	220.39	CBU_1063	hypothetical protein (NCBI)
CBU_1064	222064	NP_820064.1	29654372	7195	1009367	1009083	-	1009083	1009132	Spotted	ATCAGGCGCAGAAAATTATTGATACGTTATCCAAGTGGATGAGTGAGTGA	757		-	4	4	0	0	0	0	0	0	0	7	7	3	1	2	453.571	496	189.96	CBU_1064	hypothetical protein (NCBI)
CBU_1065	222065	NP_820065.1	29654373	7195	1009949	1009395	-	1009395	1009444	Spotted	ACGGAAGTCAATACGTCCCCTTGTATAAATTTCAATTTTCGCTACACTGA	758		-	10	10	0	0	0	0	0	0	0	42	24	5	2	2	322.714	262.5	168.374	CBU_1065	hypothetical protein (NCBI)	1514	J	2'-5' RNA ligase	GO:0016070,GO:0005622,GO:0008664	6.5.1.-
CBU_1066	222066	NP_820066.1	29654374	7195	1010006	1011787	+	1011703	1011752	Spotted	TTACATTCGTCTAGGATTACCGCTGGAAATCGTGGTATTAGTGCTTTCCC	759		-	10	10	0	0	0	0	0	0	0	73	34	9	0	0	295.781	243	142.391	CBU_1066	transporter, putative (NCBI)	471	P	Di- and tricarboxylate transporters	GO:0006813,GO:0015746,GO:0006814,GO:0016021,GO:0008324,GO:0015137
CBU_1067	222067	NP_820067.1	29654375	7195	1012554	1011784	-	1011784	1011833	Spotted	AATTGATGGACCATGAACTTTGGAATTTTCGGGAACTGAATGTTGATTAG	760		-	10	10	0	0	0	0	0	0	0	128	79	16	0	0	324.906	299.5	140.412	CBU_1067	hypothetical protein (NCBI)	37	D	Predicted ATPase of the PP-loop superfamily implicated in cell cycle control
CBU_1067a	5437857	YP_002332982.1	215919095	7195	1012620	1014368	+					761		-	0	0	0	0	0	0	0	0	0									CBU_1067a	adenylate cyclase (RefSeq)				GO:0007242,GO:0009190,GO:0016849	4.6.1.1	Adenylate cyclase.
CBU_1069	222068			7195	1014588	1016660	+	1015768	1015817	Spotted	TGGAACAACGCGCTATTAAAGCCAATCGCACCATTATTGAGGAACAATAA	762		-	1	1	1	0	0	0	0	0	0	30	11	1	1	0	237.967	209	145.036	CBU_1069	hypothetical protein (RefSeq)
CBU_1070					1016589	1016638		1016589	1016638	Spotted	CTATCCATTTTACCGGACGATCAAGCCTCACAAATCTATTTGGAACGCTG	763		-	2	1	2	1	0	0	0	0	0	25	5	2	2	0	242.44	182	195.324
CBU_1071	222070	NP_820070.2	215919096	7195	1017106	1016678	-	1016808	1016857	Spotted	TTTGTTCTCCTAGTGACTTTTGTCTTTCATCGGTTTTGGGTGCATGAACC	764		-	4	4	0	0	0	0	0	0	0	16	10	2	0	0	324.312	302.5	148.247	CBU_1071	DoxX family protein (RefSeq)	2259	S	Predicted membrane protein
CBU_1072	222071	NP_820071.1	29654379	7195	1017271	1018428	+	1018201	1018250	Spotted	CAGGAAAACGGTCGGATTCAGATCAAGAAAAGCATTTACGCTAAAGATGA	765	165	operon	10	10	0	1	3	1	0	6	0	266	182	64	10	2	374.883	331	179.854	tgt	queuine tRNA-ribosyltransferase (NCBI)	343	J	Queuine/archaeosine tRNA-ribosyltransferase	GO:0008616,GO:0008479	2.4.2.29	tRNA-guanine transglycosylase.
CBU_1073	222072	NP_820072.1	29654380	7195	1018432	1018938	+	1018889	1018938	Spotted	ATTTCCTGCTTTATGGTGTATTAATTAAAATCGTTCCTGTGAAGGGGTAA	765	165	operon	4	3	0	1	0	0	0	0	0	37	12	3	1	0	253.622	197	152.938	CBU_1073	hypothetical protein (NCBI)
CBU_1074	222073	NP_820073.1	29654381	7195	1019520	1018960	-	1018977	1019026	Spotted	AATGGATTATAAAGGCTATTTACGTAACGCGCCCGGAATTTACATGGTCG	766	166	operon	10	9	2	0	0	0	9	0	0	188	123	45	16	9	379.564	314.5	219.482	CBU_1074	hypoxanthine-guanine phosphoribosyltransferase (NCBI)	634	F	Hypoxanthine-guanine phosphoribosyltransferase	GO:0009116,GO:0004422	2.4.2.8	Hypoxanthine phosphoribosyltransferase.
CBU_1075	222074	NP_820074.1	29654382	7195	1020658	1019507	-	1019757	1019808	Spotted	AAATTGATGTAACCCAAACTTTATTTGTTAATTTATTCGAGTTCGCCCCTTC	766	166	operon	10	10	0	0	0	0	0	0	0	72	34	5	1	0	281.528	242	140.077	CBU_1075	hypothetical protein (NCBI)	668	M	Small-conductance mechanosensitive channel	GO:0016020
CBU_1075a	5437858	YP_002332983.1	215919097	7195	1020878	1021150	+					767		-	0	0	0	0	0	0	0	0	0									CBU_1075a	hypothetical protein (RefSeq)
CBU_1076	222075	NP_820075.2	215919098	7195	1022241	1021147	-					768		-	4	4	0	0	0	0	0	0	0	10	5	3	0	0	335.9	274.5	154.14	CBU_1076	IS1111A transposase (RefSeq)	3547	L	Transposase and inactivated derivatives	GO:0006313,GO:0003677,GO:0004803
CBU_1077	222076	NP_820076.1	29654384	7195	1023249	1022308	-	1022487	1022536	Spotted	CAACTTTCGAGGGGTTATCATCAGTGATGATTTAACTATGCAAGGGGCTG	769	167	operon	10	10	0	0	0	0	0	2	0	123	84	31	5	0	369.545	307	182.426	nagZ	beta-hexosaminidase (NCBI)	1472	G	Beta-glucosidase-related glycosidases	GO:0005975,GO:0004553,GO:0016231	3.2.1.52	Beta-N-acetylhexosaminidase.
CBU_1078	222077	NP_820077.1	29654385	7195	1023591	1023253	-	1023364	1023415	Spotted	AGAGTTTCAGGGTGTAAAACGAAGTTATATTCCTATGCATATGATATTGCGT	769	167	operon	10	8	0	2	0	0	0	0	0	53	24	6	2	0	301.057	229	168.422	CBU_1078	hypothetical protein (NCBI)	4517	S	Uncharacterized protein conserved in bacteria	GO:0006412,GO:0004812,GO:0005524
CBU_1079	222078	NP_820078.1	29654386	7195	1024195	1023599	-	1023599	1023648	Spotted	AGTCCACGCCTGAAGAAACTCAATATCTAAACGAGATGAAAGGTTCCTGA	769	167	operon	10	10	0	0	0	0	0	0	0	56	36	8	2	0	351.107	316	166.738	CBU_1079	hypothetical protein (NCBI)	3803	S	Uncharacterized protein conserved in bacteria
CBU_1080	222079	NP_820079.1	29654387	7195	1024755	1024273	-	1024366	1024415	Spotted	GCTATGTTTATATACATGGTTCCGGGGATGAAATCATAATGGGGAAACCG	770		-	10	9	0	1	0	0	0	0	0	42	27	10	1	0	356.929	306.5	164.098	CBU_1080	hypothetical protein (NCBI)
CBU_1081	222080	NP_820080.2	215919099	7195	1025166	1024828	-	1025040	1025082	Spotted	GTTGCTTTGTTAATGTTAGGCAATGCATGCGCAGTTTCAGCAT	771		-	6	6	0	0	0	0	0	0	0	10	10	1	0	0	427.9	460.5	107.684	CBU_1081	hypothetical protein (RefSeq)
CBU_1082	222081	NP_820081.1	29654389	7195	1026283	1025348	-	1025371	1025422	Spotted	GCGAAATGGTTTAATAGCGAAGATAAAGATTTGATCAGTCAAGTAGTGGATT	772	168	operon	10	10	0	2	1	0	0	4	0	237	168	61	6	2	380.084	328	181.143	miaA	tRNA delta(2)-isopentenylpyrophosphate transferase (NCBI)	324	J	tRNA delta(2)-isopentenylpyrophosphate transferase	GO:0008033,GO:0004811,GO:0005524	2.5.1.8	tRNA isopentenyltransferase.
CBU_1083	222082	NP_820082.2	215919100	7195	1028014	1026287	-	1026387	1026436	Spotted	GCCCCTCATTATTTGACCATAGAAGAAATGGAAGCTTTATTGCGAGAAAT	772	168	operon	10	8	0	1	0	3	0	8	0	245	160	52	5	3	360.469	324	174.46	mutL	DNA mismatch repair protein (RefSeq)	323	L	DNA mismatch repair enzyme (predicted ATPase)	GO:0006298,GO:0005524,GO:0030983
CBU_1084	222083	NP_820083.1	29654391	7195	1030126	1028075	-	1028084	1028133	Spotted	TGGCAAAGCCGATTATGCAAGATGATCTGATTAAAGTTCTCAAACGGTGG	773		-	5	5	1	1	0	0	0	1	0	39	16	5	0	0	281	237	161.646	CBU_1084	sensory box sensor histidine kinase/response regulator (NCBI)	642	T	Signal transduction histidine kinase	GO:0006355,GO:0000160,GO:0016310,GO:0018106,GO:0016020,GO:0000155,GO:0000156,GO:0005524
CBU_1085	222084	NP_820084.2	215919101	7195	1031381	1030164	-	1030224	1030274	Spotted	TACCAACAACATATTGCTTCAGCTTTAATGCAAGGTATTTGCGCTTATTTT	774		-	10	8	1	2	0	1	1	1	0	179	86	21	4	1	300.447	247	156.252	CBU_1085	N-acetylmuramoyl-L-alanine amidase (RefSeq)	860	M	N-acetylmuramoyl-L-alanine amidase	GO:0009253,GO:0008745	3.5.1.28	N-acetylmuramoyl-L-alanine amidase.
CBU_1086	222085	NP_820085.1	29654393	7195	1031508	1032500	+					775		-	4	4	0	0	0	0	0	0	0	10	5	2	0	0	332.4	251	163.745	CBU_1086	transposase, IS30 family (NCBI)	2826	L	Transposase and inactivated derivatives, IS30 family	GO:0006310,GO:0015074,GO:0003677
CBU_1087	222086	NP_820086.1	29654394	7195	1032989	1032543	-	1032570	1032621	Spotted	CCATTTTGATATTCAGTTAAATAATCGCCTTGTTAACATAACCTCGGACTCC	776		-	10	10	2	0	0	2	0	2	0	204	143	54	13	3	391.044	351	190.779	CBU_1087	conserved hypothetical protein TIGR00150 (NCBI)	802	R	Predicted ATPase or kinase
CBU_1088	222087	NP_820087.1	29654395	7195	1034469	1033003	-	1033005	1033056	Spotted	GGATTATTAGCCACTGATTTATTTCCTCATTTACGGGTTTTAGTGAATCCTT	777		-	10	10	0	0	0	2	0	0	0	200	132	36	4	1	355.23	316	168.731	CBU_1088	hypothetical protein (NCBI)	63	G	Predicted sugar kinase
CBU_1089	222088	NP_820088.1	29654396	7195	1034505	1034603	+	1034519	1034570	Spotted	GCAGAAGATAGCAACGGGTAATAATATAACGAAAAGGAGTCAACATAAAGCT	778		-	3	3	0	0	0	0	0	0	0	3	3	3	0	0	621.667	631	52.6245	CBU_1089	hypothetical protein (NCBI)
CBU_1090	222089	NP_820089.2	215919102	7195	1034651	1035745	+					779		-	3	3	0	0	0	0	0	0	0	3	3	1	0	0	480.667	449	73.7857	CBU_1090	IS1111A transposase (RefSeq)	3547	L	Transposase and inactivated derivatives	GO:0006313,GO:0003677,GO:0004803
CBU_1090a	5437859	YP_002332984.1	215919103	7195	1036014	1035742	-					780		-	0	0	0	0	0	0	0	0	0									CBU_1090a	hypothetical protein (RefSeq)
CBU_1091	222090	NP_820090.2	215919104	7195	1038433	1036184	-	1036235	1036286	Spotted	CAGGGTTGATTTAGACGATCGTAAAATCGATTTTGTGTTAGAAGAGGTAAAT	781		-	10	10	0	0	0	2	0	1	0	247	161	48	5	0	353.174	305	166.91	vacB	ribonuclease R (RefSeq)	557	K	Exoribonuclease R	GO:0016070,GO:0003723,GO:0004540,GO:0008859	3.1.-.-
CBU_1092	222091	NP_820091.1	29654399	7195	1038475	1038705	+	1038661	1038705	Spotted	GCCTATCATTCGTATGATTGTGATGAGTTTGAACCCGTCGATTAA	782		-	1	1	0	0	0	0	0	0	0	1	1	1	0	0	658	658	#DIV/0!	CBU_1092	lipoprotein, putative (NCBI)
CBU_1093	222092	NP_820092.1	29654400	7195	1041788	1038729	-	1038999	1039050	Spotted	CGGATTAATTAGCAAGCACGGAATTTTAATGGTGGAATTTGCAAATAAATTG	783	169	operon	5	5	0	3	0	0	0	3	0	42	14	4	3	2	275.595	199	202.749	CBU_1093	transporter, AcrB/AcrD/AcrF family (NCBI)	841	V	Cation/multidrug efflux pump
CBU_1094	222093	NP_820093.1	29654401	7195	1042930	1041788	-	1041808	1041857	Spotted	AACCACCGTTAAAATCGATAACAGTGTGGTATTAAAACCAGCAAACCGAG	783	169	operon	8	8	0	3	0	0	0	3	0	58	17	4	3	1	260.431	199.5	174.009	CBU_1094	efflux transporter, RND family, MFP subunit (NCBI)	845	M	Membrane-fusion protein	GO:0009306,GO:0016020,GO:0008565
CBU_1095	222094	NP_820094.2	215919105	7195	1043116	1043679	+	1043630	1043679	Spotted	ATGTTGAGCACATAACGTATTCTTGTAAGATCACCCTTTCCAAAGGCTAA	784	170	operon	3	3	0	0	0	0	0	0	0	7	4	3	1	0	402.571	397	232.151	CBU_1095	hypothetical protein (RefSeq)
CBU_1096	222095	NP_820095.2	215919106	7195	1043683	1045062	+	1044988	1045037	Spotted	GCTCTTCAATTAGGTTATTTAACCGCAAGCGAATTCGATAAAGCCGTAGA	784	170	operon	10	8	0	0	3	0	6	6	0	213	137	32	10	4	354.329	316	178.52	fumC	fumarate hydratase (RefSeq)	114	C	Fumarase	GO:0006106,GO:0045239,GO:0004333	4.2.1.2	Fumarate hydratase.
CBU_1096a	5437860			7195	1045129	1045209	+					785		-	0	0	0	0	0	0	0	0	0									CBU_1096a
CBU_1097	222096	NP_820096.1	29654404	7195	1045373	1046170	+	1045806	1045855	Spotted	CTTTTAAAACACTGAGGCTAAGAAGCTTGCGCAAACAACAAAAGCCCTAC	786		-	10	10	0	0	0	0	0	0	0	40	21	7	0	0	311.425	254.5	165.233	aldC	alpha-acetolactate decarboxylase (NCBI)	3527	Q	Alpha-acetolactate decarboxylase	GO:0047605	4.1.1.5	Acetolactate decarboxylase.
CBU_1098	222097	NP_820097.1	29654405	7195	1047008	1046184	-	1046393	1046442	Spotted	TAGCAAAGGTGATAAGATAATCCACACTTGTGACAAGGTAACCGTGGAGG	787		-	2	2	0	0	0	0	0	0	0	3	3	2	0	0	450	531	157.038	CBU_1098	hypothetical protein (NCBI)
CBU_1099	222098	NP_820098.1	29654406	7195	1047923	1047144	-	1047262	1047311	Spotted	AAAGGGAAATACCTGATGATAGGCGATAATCGTGACGATAGCGATGACAG	788	171	operon	10	9	1	2	0	0		3	1	149	61	11	4	1	276.846	224	147.53	lepB-1	signal peptidase I (NCBI)				GO:0006508,GO:0016021,GO:0009004	3.4.21.89	Signal peptidase I.
CBU_1100	222099	NP_820099.2	215919107	7195	1048361	1047933	-	1048261	1048310	Spotted	GTCTTAATCGGATTAATGGTACTTGTTGCTATTTATCTAACGGTGCCTTC	788	171	operon	3	3	0	0	0	0	0	0	0	3	3	2	1	0	600.667	531	208.423	CBU_1100	hypothetical protein (RefSeq)
CBU_1100a	5437861	YP_002332985.1	215919108	7195	1048457	1048627	+					789		-	0	0	0	0	0	0	0	0	0									CBU_1100a	hypothetical protein (RefSeq)
CBU_1101	222100			7195	1048896	1049775	+	1048972	1049023	Spotted	CGTCGATTTCACAATACCTAATTATTTTAAGAGATCTATTGCCGACTTGCTT	790		-	1	1	0	0	0	0	0	0	0	1	1	1	0	0	682	682	#DIV/0!	CBU_1101	hypothetical protein (RefSeq)
CBU_1102					1049415	1049464		1049415	1049464	Spotted	TAAAGAAATGCAACCTAAATACGCCGGTTATTTTGACAACTGCTCCGGTT	791		-	2	2	0	0	0	0	0	0	0	4	3	1	0	0	398	352.5	212.908
CBU_1103	222102	NP_820102.2	215919109	7195	1051056	1049776	-	1049776	1049825	Spotted	AGGGGCTAAAACAATTGTTGGATAAAATTTACAGTTCGGCTCCAGGTTAA	792		-	10	9	0	2	0	0	0	0	0	70	26	3	0	0	261.086	216.5	114.425	CBU_1103	Slt family transglycosylase (RefSeq)				GO:0016998
CBU_1104	222103	NP_820103.1	29654411	7195	1051234	1052226	+					793		-	0	0	0	0	0	0	0	0	0	3	3	2	0	0	487.667	551	168.194	CBU_1104	transposase, IS30 family (NCBI)	2826	L	Transposase and inactivated derivatives, IS30 family	GO:0006310,GO:0015074,GO:0003677
CBU_1105	222104			7195	1052361	1053577	+	1052613	1052662	Spotted	GATTATTTCAAACTTATACGCGGAAACCTTATCAATACGAAAATCGGCGG	794		-	3	3	0	0	0	0	0	0	0	3	3	1	0	0	458.333	415	80.3077	CBU_1105	hypothetical protein (RefSeq)
CBU_1106					1053453	1053502		1053453	1053502	Spotted	AACCCGAACAAAGTGATTCCGATTGCTCTTTCTCTACTAATATGCCACTC	795		-	1	1	0	0	0	0	0	0	0	3	2	0	0	0	319	297	87.1091
CBU_1107	222106			7195	1056857	1053702	-	1053805	1053854	Spotted	ATTTTAGATTTATTGACGATAGATGTGCTTGAGATGAAGAGCGAATCGAG	796		-	5	5	3	0	0	0	0	0	0	8	8	5	3	3	639.375	651	293.136	CBU_1107	hypothetical protein (RefSeq)
CBU_1108					1054683	1054734		1054683	1054734	Spotted	TTGCTTCTCTTCAGGAGTGATACTTAAGCGTTTTGAACAAATTATTGAAGAT	797		-	5	5	3	0	0	0	0	0	0	8	8	5	3	3	639.625	654	291.642
CBU_1109					1055462	1055511		1055462	1055511	Spotted	ATCAAATTAATAACTATCCGGATAGTTTAGCGGTGGTCTATCAATGGTTG	797		-	5	5	3	0	0	0	0	0	0	8	8	5	3	3	638.125	654	289.81
CBU_1110					1056791	1056842		1056791	1056842	Spotted	TCTATTTACAATTCTACGATTCCTACCCTGAGAGAATATATGAGCCGTTCCC	797		-	5	5	3	0	0	0	0	0	0	8	8	5	3	3	642.25	654	294.803
CBU_1111	222110	NP_820110.2	215919110	7195	1058139	1056925	-	1057261	1057310	Spotted	ATCATCCAACAGAAGTCAATGCGTTACTGAATTGCAATGCTTCTTTTGTG	798	172	operon	10	10	0	0	0	0	0	0	0	71	43	14	1	0	347.507	319	170.349	CBU_1111	membrane-bound lytic murein transglycosylase A (RefSeq)	2821	M	Membrane-bound lytic murein transglycosylase	GO:0007010,GO:0009254,GO:0019867,GO:0003779,GO:0004553	3.2.1.-
CBU_1112	222111	NP_820111.2	215919111	7195	1058474	1058109	-	1058109	1058158	Spotted	TTCTGCACCCAGAAACGCTTTGGTATTTATTATGCTCCGTAGTATATTGA	798	172	operon	9	9	0	0	0	0	0	0	0	18	16	7	1	0	463	404.5	191.12	CBU_1112	GIY-YIG catalytic domain protein (RefSeq)	2827	L	Predicted endonuclease containing a URI domain	GO:0006281,GO:0005622,GO:0004518
CBU_1113	222112			7195	1059858	1058642	-	1058642	1058691	Spotted	TGCAGAGAATTATGCAACGGCCTAGTAATCAGCCCAAAGCAAGTATTTAG	799		-	4	4	0	0	0	0	0	0	0	8	8	2	0	0	458.75	417	123.484	CBU_1113	hypothetical protein (RefSeq)
CBU_1114					1059398	1059447		1059398	1059447	Spotted	GATGATCCAATTATCGTCGAAGGAACAGCTTTACAAATCGCTTTAGGGGC	800		-	2	2	0	0	0	0	0	0	0	8	8	2	0	0	432.375	361	159.751
CBU_1115	222114	NP_820114.1	29654422	7195	1059970	1060287	+	1060183	1060232	Spotted	ATCATCGCCTTTATTCGGATAAAATTAGCACAACGTAAACGACCCAAAGA	801		-	2	2	0	0	0	0	0	0	0	8	8	2	0	0	364.5	296	147.689	CBU_1115	hypothetical protein (NCBI)
CBU_1116	222115	NP_820115.1	29654423	7195	1061397	1060288	-	1060518	1060567	Spotted	TAAACCAACTACGCATAAGAAACCCACTTACGTAATCGACGGGATTGTCC	802		-	10	7	2	1	0	0	4	1	1	106	59	19	9	1	349.575	278.5	192.916	ald	alanine dehydrogenase (NCBI)	686	E	Alanine dehydrogenase	GO:0006118,GO:0000286	1.4.1.1	Alanine dehydrogenase.
CBU_1117	222116	NP_820116.1	29654424	7195	1062370	1061426	-	1061521	1061570	Spotted	TGGGATGAGGAATAGTAAAATTATTGTAGCCATCAACAAAGACCCCGAGG	803	173	operon	10	9	1	3	3	1	2	6	0	115	66	13	5	2	328	279	174.158	etfA	electron transfer flavoprotein, alpha subunit (NCBI)	2025	C	Electron transfer flavoprotein, alpha subunit	GO:0006118,GO:0009055,GO:0050660
CBU_1118	222117	NP_820117.1	29654425	7195	1063119	1062367	-	1062532	1062581	Spotted	TAAACAAACCGCGTTATCCCACTTTACCGAACATTATGAAAGCCAAAAGC	803	173	operon	10	10	1	2	3	1	2	5	0	112	58	11	5	2	319.875	273.5	173.47	etfB	electron transfer flavoprotein, beta subunit (NCBI)	2086	C	Electron transfer flavoprotein, beta subunit	GO:0006118,GO:0009055
CBU_1119	222118	NP_820118.2	215919112	7195	1063937	1063116	-	1063360	1063409	Spotted	TTCCATGGATTATTGAAGGCCGCTGATAATTTGCCAAGTGAAACGATACC	803	173	operon	10	10	0	0	0	0	0	0	0	41	20	6	3	0	326.39	244	188.031	CBU_1119	carboxymethylenebutenolidase (RefSeq)	412	Q	Dienelactone hydrolase and related enzymes	GO:0016787	3.1.1.45	Carboxymethylenebutenolidase.
CBU_1120	222119	NP_820119.1	29654427	7195	1063960	1065585	+	1065267	1065317	Spotted	GGACGGCAAATTGACTTTTGATAAATTAACACAAGTCTATTTAACCGGGAC	804		-	10	10	0	2	1	0	2	2	0	64	36	11	2	2	334.375	275	190.262	CBU_1120	electron transfer flavoprotein-ubiquinone oxidoreductase (NCBI)	644	C	Dehydrogenases (flavoproteins)	GO:0006118,GO:0004174	1.5.5.1	Electron-transferring-flavoprotein dehydrogenase.
CBU_1121	222120	NP_820120.1	29654428	7195	1065762	1065580	-	1065640	1065680	Spotted	GTCAAGAGAATAACTTCATGGAATTGGGATTAAAACGACGA	805		-	1	1	0	0	0	0	0	0	0	5	5	1	0	0	438	381	129.696	CBU_1121	hypothetical protein (NCBI)
CBU_1122	222121	NP_820121.2	215919113	7195	1065790	1066551	+	1066315	1066364	Spotted	TTCCGAATATTCCGTGTTCATGGTGAAAATTGTAAATCGGGAAAATATCC	806		-	7	5	0	2	0	0	0	0	0	31	11	1	0	0	271.903	215	133.344	enhA.3	enhanced entry protein (RefSeq)	1376	S	Uncharacterized protein conserved in bacteria
CBU_1123	222122	NP_820122.2	215919114	7195	1066703	1067728	+	1067248	1067297	Spotted	CATTGTTGATTATCAAACGGGACAAGTGACATCTAAAACGCGTCAACTTC	807	174	operon	10	9	0	3	2	4	0	6	0	114	53	11	6	2	298.026	242	173.959	cbpA	curved DNA-binding protein (RefSeq)	484	O	DnaJ-class molecular chaperone with C-terminal Zn finger domain	GO:0006457,GO:0031072,GO:0051082
CBU_1124	222123	NP_820123.1	29654431	7195	1067731	1068051	+	1067965	1068014	Spotted	ATCGCCATTGCACTCGATTTGCTAGATAAAATTGAGCATTTAGAGCAGCG	807	174	operon	6	6	0	1	0	0	0	0	0	25	13	3	3	1	341.64	252	232.354	CBU_1124	hypothetical protein (NCBI)
CBU_1125	222124			7195	1068055	1069472	+	1068833	1068883	Spotted	CTATTTCGATTGCTGATACGCTTTCTATTTATACCGATTTGGGTATTCCAA	807	174	operon	5	4	2	0	0	0	0	0	0	28	8	4	4	1	309.607	200.5	246.382	CBU_1125	chitinase family protein, putative (RefSeq)				GO:0006412,GO:0005975,GO:0005840,GO:0003735,GO:0004553,GO:0043169
CBU_1126					1069146	1069195		1069146	1069195	Spotted	AAAACCGTAGGGCGATTTTATGCATTTATCAGTTACCCCGATCCAAAAGC	808		-	4	4	1	0	0	0	0	0	0	5	5	3	3	1	709.2	864	266.778
CBU_1127	222126	NP_820126.2	215919115	7195	1070161	1069646	-	1069705	1069754	Spotted	GGTGTTAGATATTCGTAACATGGAGGCTATGTTAATTATTTTGGCCGCTG	809	175	operon	6	6	0	0	0	0	0	0	0	17	6	6	3	0	368.706	185	280.242	CBU_1127	hypothetical membrane spanning protein (RefSeq)
CBU_1128	222127	NP_820127.1	29654435	7195	1070520	1070161	-	1070244	1070293	Spotted	TGAAGGCAAAACGTTCGACGAAGCAAATCACTTAGATAGCGATCAAATAC	809	175	operon	10	10	0	2	3	3	0	4	0	62	31	12	7	1	344.661	245.5	226.492	CBU_1128	NifU family protein (NCBI)				GO:0016226,GO:0051536,GO:0005506
CBU_1129	222128	NP_820128.1	29654436	7195	1071717	1070527	-	1070636	1070685	Spotted	ACTCGAGAAGAAGCGGACAATTCCATTCGTATTAGTTTCGGTCGATTTAC	809	175	operon	10	10	0	3	2	1	3	7	1	135	68	22	11	4	327.77	256	205.268	nifS	cysteine desulfurase (NCBI)	1104	E	Cysteine sulfinate desulfinase/cysteine desulfurase and related enzymes	GO:0008152,GO:0008483,GO:0030170,GO:0031071	2.8.1.7,4.4.1.-	Cysteine desulfurase.,
CBU_1130	222129	NP_820129.2	215919116	7195	1073783	1071714	-	1071828	1071877	Spotted	GTGCGTTAATGGGCGTTATTTTAGCCATTCCTTTTGTTATAATGGGCACG	809	175	operon	10	10	0	0	0	0	0	0	0	52	29	6	3	0	335	307.5	180.734	CBU_1130	OPT family oligopeptide transporter (RefSeq)	1297	S	Predicted membrane protein
CBU_1131	222130	NP_820130.1	29654438	7195	1074496	1073774	-	1073784	1073833	Spotted	GAATTGAATATTCTGCGGGGTATTTTAGCTTCTATTCATAGACGGGATGA	810		-	10	10	0	1	0	0	0	0	0	143	82	27	2	0	351.916	312	178.655	CBU_1131	RNA methyltransferase, TrmH family, group 1 (NCBI)	565	J	rRNA methylase	GO:0006396,GO:0003723,GO:0008173	2.1.1.-
CBU_1132	222131	NP_820131.1	29654439	7195	1074591	1074689	+	1074640	1074689	Spotted	ACAGCAAACCTTATGCTATTATTCTCGCCATTTTAACCAAGAGAAAATGA	811	176	operon	6	6	0	0	0	0	0	0	0	6	6	6	1	0	604.5	531	139.398	CBU_1132	hypothetical protein (NCBI)
CBU_1133	222132	NP_820132.2	215919117	7195	1074686	1075489	+	1075102	1075151	Spotted	AATTCGCGTTAGCTCCTGTCAGAAATTAAGTCACGCCCTAATAGGAACTG	811	176	operon	10	10	1	1	0	0	0	1	0	156	92	25	3	1	326.026	283	155.462	suhB	myo-inositol-1(or 4)-monophosphatase (RefSeq)	483	G	Archaeal fructose-1,6-bisphosphatase and related enzymes of inositol monophosphatase family	GO:0008934,GO:0004437	3.1.3.25	Inositol-phosphate phosphatase.
CBU_1134	222133	NP_820133.1	29654441	7195	1076016	1075561	-	1075671	1075720	Spotted	TTCAAATGATGGAATTAAAGTCAATTGCGCTGGAACCAACGTGTCTGTTC	812		-	1	1	0	0	0	0	0	0	0	1	1	1	0	0	666	666	#DIV/0!	CBU_1134	hypothetical protein (NCBI)
CBU_1135	222134	NP_820134.1	29654442	7195	1076067	1076501	+	1076399	1076448	Spotted	ACCAAATAATTATTGGACAAACAAAATGCCTCTGGCTTTTACGTGTCCCG	813		-	1	1	0	0	0	0	0	0	0	1	1	1	0	0	666	666	#DIV/0!	CBU_1135	hypothetical protein (NCBI)
CBU_1136	222135	NP_820135.1	29654443	7195	1079798	1076664	-	1076715	1076764	Spotted	CAACAACGGCTTTGCAGAAAATTATAAAAGTAAGACCTAATTTCCAGCCC	814	177	operon	6	2	1	3	0	0	0	0	0	25	9	4	3	1	323.8	196	255.665	CBU_1136	enhanced entry protein EnhC (NCBI)	790	R	FOG: TPR repeat, SEL1 subfamily	GO:0005488
CBU_1137	222136	NP_820136.1	29654444	7195	1080349	1079795	-	1079883	1079933	Spotted	CGATAATAATCGTGGAAATTATTGGGCCGTAGAAAATATTGGCTCTTCAAC	814	177	operon	2	2	0	0	0	0	0	0	0	2	2	2	2	0	869	869	0	CBU_1137	enhanced entry protein EnhB, putative (NCBI)
CBU_1138	222137	NP_820137.1	29654445	7195	1081098	1080352	-	1080358	1080407	Spotted	ATTTAGGGACAAAAGTGGTCGTAGAGAAACTCACCATGGAGAATAGTGGG	814	177	operon	3	2	0	1	0	0	0	0	0	27	6	2	2	0	251.37	170	193.432	CBU_1138	enhanced entry protein EnhA, putative (NCBI)
CBU_1138a	5437862	YP_002332986.1	215919118	7195	1081538	1081386	-					815		-	0	0	0	0	0	0	0	0	0									CBU_1138a	hypothetical protein (RefSeq)
CBU_1139	222138	NP_820138.2	215919119	7195	1081747	1081610	-	1081620	1081669	Spotted	AAATCACCCGTCATTCAAACATCTTTGATCTTTCTATCTCTCCAATTACT	816		-	1	1	0	0	0	0	0	0	0	1	1	1	0	0	534	534	#DIV/0!	CBU_1139	hypothetical membrane associated protein (RefSeq)
CBU_1140	222139			7195	1082006	1083116	+	1082593	1082642	Spotted	TGTTCAAGTTGGGTTGAACTTATTCAATATTGAGCAATGCACCCAATTTG	817		-	1	1	0	0	0	0	0	0	0	1	1	1	0	0	534	534	#DIV/0!	CBU_1140	hypothetical protein (RefSeq)
CBU_1141	222140	NP_820140.1	29654448	7195	1084027	1083113	-	1083189	1083238	Spotted	ATCATTGGCATTGTTATTGGGACTTATTCATCCATTTACGTTGCGGGGTC	818	178	operon	10	6	1	1	1	0	0	9	1	171	120	52	8	2	397.977	351	195.492	secF	protein-export membrane protein SecF (NCBI)	341	U	Preprotein translocase subunit SecF	GO:0006886,GO:0015628,GO:0009276,GO:0015627,GO:0015450
CBU_1142	222141	NP_820141.1	29654449	7195	1085895	1084027	-	1084027	1084076	Spotted	CACGTTTGTCTATTGGGATTAACGCAAAATCCGCAGAGGCTAAGAAGTAA	818	178	operon	10	6	1	1	3	1	0	8	1	187	131	39	8	2	371.717	335	177.273	secD	protein-export membrane protein SecD (NCBI)	342	U	Preprotein translocase subunit SecD	GO:0006886,GO:0015628,GO:0009276,GO:0015627,GO:0015450
CBU_1143	222142	NP_820142.1	29654450	7195	1086261	1085911	-	1085937	1085986	Spotted	CAAAGGTACCGAAATCACTGTACAGAAAGCTTCTATAGCCTCTGTATTGC	818	178	operon	10	7	0	0	3	0	0	7	0	176	113	35	8	3	362.403	318.5	184.274	yajC	preprotein translocase, YajC subunit (NCBI)	1862	U	Preprotein translocase subunit YajC
CBU_1144	222143	NP_820143.1	29654451	7195	1086641	1086288	-	1086506	1086555	Spotted	GAAAATATCAACGGTCAATTACAATGCACGCGTTATAGACCTCGCTACCC	819		-	4	4	0	0	0	0	0	0	0	4	4	4	1	0	716.5	715	40.0458	CBU_1144	hypothetical protein (NCBI)
CBU_1145	222144	NP_820144.1	29654452	7195	1086677	1086784	+	1086684	1086725	Spotted	CCGGTTCCGAAAAAGGATTAAATGCAAACGCAAAAGAAGAAG	820		-	4	4	0	0	0	0	0	0	0	4	4	4	0	0	594.5	576	52.7984	CBU_1145	hypothetical protein (NCBI)
CBU_1146	2210047			7195	1089959	1086990	-					821		-	0	0	0	0	0	0	0	0	0									CBU_1146
CBU_1147	222145	NP_820145.2	215919120	7195	1090311	1091426	+	1091316	1091365	Spotted	AATGATCATTGTCACGTTCAATTTGAACATCCACAACGAGCAATCACTCG	822	179	operon	10	10	1	2	1	0	0	3	0	269	176	59	10	1	363.606	307	177.233	trmU	tRNA (5-methylaminomethyl-2-thiouridylate)-methyltransferase (RefSeq)	482	J	Predicted tRNA(5-methylaminomethyl-2-thiouridylate) methyltransferase, contains the PP-loop ATPase domain	GO:0006526,GO:0008033,GO:0005737,GO:0004055,GO:0004808,GO:0005524	2.1.1.61	tRNA (5-methylaminomethyl-2-thiouridylate)-methyltransferase.
CBU_1148	222146	NP_820146.1	29654454	7195	1091438	1094911	+	1094528	1094577	Spotted	GTCCCCGATGTTAATGCTCGTCTTATTCTTTATAAGCGCTTAGCTAATTG	822	179	operon	10	10	0	1	0	2	0	1	0	188	130	43	3	0	360.516	319	163.788	mfd	transcription-repair coupling factor (NCBI)	1197	LK	Transcription-repair coupling factor (superfamily II helicase)	GO:0006355,GO:0006281,GO:0003684,GO:0003700,GO:0008026,GO:0005524	3.6.1.-
CBU_1149					1095391	1095440		1095391	1095440	Spotted	TTTGGGTATTGGTCAATAGTCAGGATACCGTAAAGTTCAAACAGCGTTAG	823		-	1	1	0	0	0	0	0	0	0	1	1	1	0	0	675	675	#DIV/0!
CBU_1150	222148			7195	1095052	1095739	+	1095624	1095674	Spotted	GACCTTTTACTTTATTTCATCAAAGGCAACTTATTCCACATCAGCAACGTA	824		-	1	1	0	0	0	0	0	0	0	3	3	1	0	0	442	332	201.889	CBU_1150	hypothetical protein (RefSeq)
CBU_1151	222149	NP_820149.2	215919121	7195	1096495	1095758	-	1095758	1095809	Spotted	AGACGCAGTTTGTGATTACCATCGTTTGATTTTACCCACACTTAATAAATAG	825		-	10	10	0	0	0	0	0	0	0	108	39	6	0	0	262.481	217.5	124.515	CBU_1151	HAD superfamily hydrolase (RefSeq)	546	R	Predicted phosphatases	GO:0008152,GO:0003824,GO:0008967
CBU_1152	222150	NP_820150.1	29654458	7195	1096631	1098022	+	1097770	1097819	Spotted	GATGGAAATTATCGATGAACTCGAACATTCTCGTCGCGGTTTATACGGTG	826		-	10	9	1	6	5	2	3	6	0	197	92	15	6	5	293.223	243	164.341	trpE	anthranilate synthase component I (NCBI)	147	EH	Anthranilate/para-aminobenzoate synthases component I	GO:0009058,GO:0005950,GO:0004049,GO:0016833	4.1.3.27	Anthranilate synthase.
CBU_1152a	5437863			7195	1098298	1099667	+					827		-	0	0	0	0	0	0	0	0	0									CBU_1152a
CBU_1154	222151	NP_820151.1	29654459	7195	1099660	1100433	+	1100367	1100418	Spotted	GGGAGAGGCATTAGTTAAATCAGAAAATCCTCAACAATTTATTAGCGCTATT	828	180	operon	10	10	2	6	3	2	0	6	0	221	136	43	9	4	356.525	304	180.204	trpC	indole-3-glycerol phosphate synthase (NCBI)	134	E	Indole-3-glycerol phosphate synthase	GO:0006568,GO:0004425	4.1.1.48	Indole-3-glycerol-phosphate synthase.
CBU_1155	222152	NP_820152.1	29654460	7195	1100426	1102228	+	1101889	1101938	Spotted	TGGCACTTATACTTATCTTTTACAAGATGAGAATGGCCAAATTGCGAAGA	828	180	operon	10	10	2	5	6	2	1	6	0	171	115	48	11	4	395.942	358	207.87	trpBF	tryptophan synthase subunit beta (NCBI)	133	E	Tryptophan synthase beta chain	GO:0006568,GO:0004640,GO:0004834,GO:0030170	4.2.1.20	Tryptophan synthase.
CBU_1156	222153	NP_820153.1	29654461	7195	1102245	1103048	+	1102899	1102948	Spotted	TACGCTGACGGTTTTGTAATCGGTTCGTTATTTGTAAAAGCAATCGCAGA	828	180	operon	10	10	1	4	3	1	2	8	0	177	107	51	13	5	390.576	325	215.431	trpA	tryptophan synthase, alpha subunit (NCBI)	159	E	Tryptophan synthase alpha chain	GO:0006568,GO:0004834	4.2.1.20	Tryptophan synthase.
CBU_1157	222154	NP_820154.1	29654462	7195	1103746	1103045	-	1103147	1103196	Spotted	TATTGGCTTATTTGGTAGGAGAGCGCCATATCAAAGTCATTATCGCTCCC	829		-	8	8	0	2	0	0	0	0	0	53	21	4	0	0	264.811	216	127.104	CBU_1157	lipoprotein, putative (NCBI)				GO:0006461,GO:0019627,GO:0016151
CBU_1158	222155	NP_820155.1	29654463	7195	1103871	1105238	+	1104708	1104759	Spotted	CCGAGCATTTATACTTCTCCTCTCTTATATTTAGTTAATCATCCCATTCCCT	830		-	5	3	0	2	0	1	0	1	1	39	11	2	1	0	250.641	195	139.973	CBU_1158	ergosterol biosynthesis ERG4/ERG24 family protein (NCBI)				GO:0016020
CBU_1159	222156	NP_820156.1	29654464	7195	1105255	1105392	+	1105333	1105367	Spotted	ACTATCACAATCCCAACTTTGGACCGGACAACGAG	831		-	3	3	0	0	0	0	0	0	0	4	4	2	1	0	550.5	521.5	197.812	CBU_1159	hypothetical protein (NCBI)
CBU_1160	222157	NP_820157.1	29654465	7195	1105682	1106857	+	1106798	1106847	Spotted	TTCAATCCAAGAGCTAAAACGGCGAAGAATTTATTAACTAAAGCAAAACG	832		-	4	3	0	1	0	0	0	0	0	31	8	2	0	0	249.355	201	131.656	CBU_1160	TPR domain protein (NCBI)				GO:0005488
CBU_1161	222158	NP_820158.1	29654466	7195	1106926	1107018	+	1106963	1107005	Spotted	TTTCAAAGCTCCTTGATGCAACGGATTCCTACCATTACCCACC	833		-	1	1	0	0	0	0	0	0	0	4	4	1	0	0	405	345	167.829	CBU_1161	hypothetical protein (NCBI)
CBU_1162	222159	NP_820159.1	29654467	7195	1108688	1107357	-	1107369	1107420	Spotted	AGTCGGATTATTAATTGCAGGGTTCGTCACTTTATTTATCAAGGAAACTTAT	834		-	2	2	0	0	0	0	0	0	0	19	6	1	0	0	240.632	204	106.223	CBU_1162	major facilitator family transporter (NCBI)	2271	G	Sugar phosphate permease	GO:0006810,GO:0016042,GO:0006644,GO:0016021,GO:0004623,GO:0005215,GO:0005509
CBU_1163					1108762	1108804		1108762	1108804	Spotted	TTCGCTTTGAAAGACCGAAAACTTGGAGCGACGTCAAGTCATT	835		-	0	0	0	0	0	0	0	0	0
CBU_1164	222161			7195	1110527	1108829	-	1108834	1108883	Spotted	TCAGCAAACTATTTTATTCTTGGTGGAACACAAGCTCGACAGGAAACGAT	836		-	4	4	0	0	0	0	0	0	0	7	5	2	0	0	402.286	466	191.973	CBU_1164	hypothetical protein (RefSeq)
CBU_1165					1109236	1109285		1109236	1109285	Spotted	TTGGAAATTATGCGAATTTTATGCAGGGCTTGTTAATTATCGAGCCATAG	837		-	4	4	0	0	0	0	0	0	0	7	5	3	0	0	426.714	448	193.943
CBU_1166					1109699	1109750		1109699	1109750	Spotted	GACGTTCTTTGGATAACTTATTTACTCAATTACAAACACCTGAGGCAAAAAC	837		-	3	3	0	0	0	0	0	0	0	7	6	2	1	0	446.429	394	219.436
CBU_1167					1109850	1109901		1109850	1109901	Spotted	GCGACTTAATGAAAGTTCATTTCACCTTGTCGGAAAGTTCGTTATAACAAAG	837		-	3	3	0	0	0	0	0	0	0	7	6	2	1	0	446.429	394	219.436
CBU_1168	222165			7195	1110854	1112486	+	1112308	1112357	Spotted	TAACAAAACCTACAAACACTTGGCACATACTTCTTCGGGAAATGGCTTCG	838		-	2	1	0	2	0	0	0	0	0	31	11	2	0	0	254.742	215	115.661	CBU_1168	protein kinase, putative (RefSeq)				GO:0006468,GO:0004674,GO:0004713,GO:0005524
CBU_1169	222166	NP_820166.1	29654474	7195	1112550	1113005	+	1112771	1112820	Spotted	GGAAAATAATATCTTGACGATTAAAGGGGAAAGAGAAACGGAAGCGAAAG	839		-	10	10	0	0	0	0	0	5	0	118	65	11	2	0	304.025	266	143.215	CBU_1169	heat shock protein, Hsp20 family (NCBI)	71	O	Molecular chaperone (small heat shock protein)
CBU_1170	222167	NP_820167.1	29654475	7195	1113154	1113360	+	1113291	1113340	Spotted	CATTTATGTCTTAATTGGCTTAGCTGCATTGTGGTTTATTTTCCACTTGA	840		-	1	1	0	0	0	0	0	0	0	9	2	1	0	0	245.111	191	125.457	CBU_1170	hypothetical protein (NCBI)	2155	S	Uncharacterized conserved protein
CBU_1171	222168	NP_820168.2	215919122	7195	1113886	1113434	-	1113488	1113537	Spotted	ATAATGAATTGGCTTTAGGAACATGGCAGGGGATCTATCTTTGGGAACAC	841		-	10	10	0	0	1	0	0	0	0	90	62	16	0	0	348.9	319.5	146.321	CBU_1171	hypothetical protein (RefSeq)	432	S	Uncharacterized conserved protein
CBU_1172	2210050			7195	1115340	1113908	-					842		-	0	0	0	0	0	0	0	0	0									CBU_1172
CBU_1173	222169	NP_820169.1	29654477	7195	1115568	1115936	+	1115819	1115868	Spotted	TCAACCAAAAGGAGGTTGGCAAGTCTACAAAGTCTATCAATCGCTTGATG	843		-	0	0	0	0	0	0	0	0	0	1	1	0	0	0	359	359	#DIV/0!	CBU_1173	hypothetical protein (NCBI)
CBU_1174	2210051			7195	1116429	1116011	-					844	181	operon	0	0	0	0	0	0	0	0	0									CBU_1174
CBU_1175	222170	NP_820170.1	29654478	7195	1117749	1116436	-	1116613	1116662	Spotted	AAGATCCCCAAGATGATTACGATACGAAGGATGCTATTATTGCCGTGGTG	844	181	operon	1	1	0	0	0	0	0	0	0	1	1	1	0	0	547	547	#DIV/0!	CBU_1175	hypothetical protein (NCBI)
CBU_1176	222171	NP_820171.1	29654479	7195	1117997	1119415	+	1119336	1119385	Spotted	ACCCTTTCCCTATCGTGAATCATCACAAAGCAAAGGAATTGGCTTTAAAA	845		-	10	9	0	0	0	0	0	2	0	93	63	13	0	0	336.71	304	142.455	phrB	deoxyribodipyrimidine photolyase - class I (NCBI)	415	L	Deoxyribodipyrimidine photolyase	GO:0006281,GO:0003904,GO:0003913	4.1.99.3	Deoxyribodipyrimidine photo-lyase.
CBU_1177	222172	NP_820172.1	29654480	7195	1119625	1119443	-	279023	279052	Spotted	TATCGGTAGACGGCCTACGCACGGGAACGA	846		-	0	0	0	0	0	0	0	0	0	2	2	0	0	0	283	283	22.6274	CBU_1177	hypothetical protein (NCBI)
CBU_1178	222173	NP_820173.1	29654481	7195	1120012	1121145	+	1120972	1121021	Spotted	TTAGCAAAAGCAAAAGATTCCTTTACAGAATTACAAAAGAACGCGGGAAG	847		-	1	1	0	0	0	0	0	0	0	2	2	1	0	0	507.5	507.5	294.864	CBU_1178	hypothetical protein (NCBI)
CBU_1179	222174	NP_820174.1	29654482	7195	1121188	1122384	+	1122106	1122155	Spotted	TTTATTTGGCCCATGTTGTTAATTGGCATTGGAGGAACATTTGGTCTTGG	848		-	1	1	0	0	0	0	0	0	0	29	11	1	0	0	237.828	216	109.434	CBU_1179	drug resistance transporter, Bcr/CflA family (NCBI)	2814	G	Arabinose efflux permease	GO:0006810,GO:0016021,GO:0005215
CBU_1180	222175	NP_820175.1	29654483	7195	1122535	1122404	-	1122419	1122461	Spotted	TGTCCGTACAAAAGAAATCACCAACTTCCATGGGAATCGACTC	849		-	3	3	0	0	0	0	0	0	0	3	3	2	0	0	643	728	147.224	CBU_1180	hypothetical protein (NCBI)
CBU_1181	222176	NP_820176.1	29654484	7195	1123752	1122574	-	1122609	1122658	Spotted	TTTAAAAGCCGAAGAAAATTTGCCTCTAAATGAACTGATCAATGAAGCCC	850	182	operon	10	10	0	0	0	0	2	3	0	100	65	26	2	2	373.91	334	183.975	thiI	thiazole biosynthesis protein ThiI (NCBI)	301	H	Thiamine biosynthesis ATP pyrophosphatase	GO:0009228,GO:0005507
CBU_1182	222177	NP_820177.1	29654485	7195	1124895	1123753	-	1123784	1123835	Spotted	GCTATAACACGCATGAAGAGATTCACTATGTGTTAGAAAACCTTCAATCAAT	850	182	operon	10	10	0	3	1	1	2	6	2	100	54	14	5	1	319.47	267	182.311	iscS	cysteine desulfurase (NCBI)	1104	E	Cysteine sulfinate desulfinase/cysteine desulfurase and related enzymes	GO:0008152,GO:0008483,GO:0030170,GO:0031071	2.8.1.7,4.4.1.-	Cysteine desulfurase.,
CBU_1183	222178	NP_820178.2	215919123	7195	1125097	1125450	+	1125343	1125392	Spotted	GATCTCCAAGGTCGCAAAATTCGAGTTAACATAGCGCGAGAAAATACAGG	851		-	10	8	0	0	0	0	0	3	0	54	24	2	0	0	279.907	235.5	118.436	CBU_1183	nucleic acid binding domain-containing protein (RefSeq)				GO:0000166,GO:0003676,GO:0003723
CBU_1184	222179	NP_820179.1	29654487	7195	1126249	1125521	-	1125556	1125605	Spotted	ACAGGGGATTCGTGAACTTTCAAAGAAGATAATGGAAGAGTTATGTGAAA	852		-	7	7	0	2	0	0	0	0	0	26	8	4	0	0	283.654	214.5	151.943	CBU_1184	acyltransferase, putative (NCBI)	204	I	1-acyl-sn-glycerol-3-phosphate acyltransferase	GO:0008152,GO:0008415
CBU_1185	222180	NP_820180.1	29654488	7195	1128181	1126352	-	1126423	1126472	Spotted	ATATTTCGGTGGGTTACAAGAACTTCAGCGAGCTAGCATTGAAGAAATCG	853		-	10	9	0	2	0	3	0	7	0	287	191	53	5	3	355.76	318	166.81	uvrC	excinuclease ABC, C subunit (NCBI)	322	L	Nuclease subunit of the excinuclease complex	GO:0006289,GO:0005737,GO:0009380,GO:0043565,GO:0009381
CBU_1186	222181	NP_820181.2	215919124	7195	1128693	1129787	+					854		-	0	0	0	0	0	0	0	0	0									CBU_1186	IS1111A transposase (RefSeq)	3547	L	Transposase and inactivated derivatives	GO:0006313,GO:0003677,GO:0004803
CBU_1186a	5437864	YP_002332987.1	215919125	7195	1130056	1129784	-					855		-	0	0	0	0	0	0	0	0	0									CBU_1186a	hypothetical protein (RefSeq)
CBU_1186b	5437865	YP_002332988.1	215919126	7195	1130104	1130247	+					856		-	0	0	0	0	0	0	0	0	0									CBU_1186b	hypothetical protein (RefSeq)
CBU_1187	222182	NP_820182.1	29654490	7195	1130465	1131112	+	1131012	1131061	Spotted	TTGACCCTAAATATTCCAAATACGTCTTCAGCAAAATCAAAGGTGGCAGC	857		-	0	0	0	0	0	0	0	0	0	19	4	0	0	0	222.053	205	52.6745	CBU_1187	hypothetical protein (NCBI)
CBU_1188	222183	NP_820183.1	29654491	7195	1132380	1131109	-	1131312	1131361	Spotted	GCTGCCAAGTCAAAATAAATACCGAGAGATTTCTTCTTGCAGCAATTGCG	858	183	operon	10	8	0	0	0	0	4	2	0	260	187	84	11	2	410.265	383	191.8	serS	seryl-tRNA synthetase (NCBI)	172	J	Seryl-tRNA synthetase	GO:0006434,GO:0005737,GO:0004828,GO:0005524	6.1.1.11	Serine--tRNA ligase.
CBU_1189	222184	NP_820184.3	215919127	7195	1133739	1132456	-	1132466	1132516	Spotted	GCTTGAATATTATAGAAAGCTCAACGAACAACACAAAACGACTGAGGATAG	858	183	operon	10	10	0	0	0	0	0	0	0	217	148	49	7	2	366.442	307	179.729	CBU_1189	ATPase, AAA family (RefSeq)	2256	L	ATPase related to the helicase subunit of the Holliday junction resolvase	GO:0005524,GO:0017111
CBU_1190	222185	NP_820185.1	29654493	7195	1134397	1133762	-	1133812	1133861	Spotted	AAGTATTTTCCAATTCAGCCAAATTAAGGTAAACGCTCCATTGTCGAGTA	858	183	operon	10	8	0	1	0	0	0	2	0	83	42	10	5	2	315.566	256	181.269	lolA	outer membrane lipoprotein carrier protein LolA (NCBI)	2834	M	Outer membrane lipoprotein-sorting protein	GO:0015031,GO:0030288
CBU_1191	222186	NP_820186.2	215919128	7195	1136766	1134409	-	1134665	1134714	Spotted	GAAAGTAGCGAACCGAATTATGTCGAAGGAATATTGGATGAAATGGGCGC	858	183	operon	10	10	0	1	0	2	0	3	0	260	174	51	8	2	361.385	323	171.916	ftsK	FtsK/SpoIIIE family protein (RefSeq)	1674	D	DNA segregation ATPase FtsK/SpoIIIE and related proteins	GO:0007049,GO:0051301,GO:0007059,GO:0016021,GO:0003677,GO:0005524,GO:0017111
CBU_1192					1136805	1136854		1136805	1136854	Spotted	TGATGACAAACCTGAAAGCGGTTAGTATTATAGCCCGAATCATTCACTAA	859		-	0	0	0	0	0	0	0	0	0
CBU_1193	222188	NP_820188.1	29654496	7195	1136869	1137831	+	1137615	1137664	Spotted	CAAAATATTTAAAGAGCAGTTGGAAATGGATGAAGCGGGTTACCTTCGCG	860		-	10	10	1	1	0	4	0	5	0	271	167	55	11	1	357.59	295	180.289	trxB	thioredoxin reductase (NCBI)	492	O	Thioredoxin reductase	GO:0006118,GO:0019430,GO:0005737,GO:0004791	1.6.4.5,1.8.1.9	Transferred entry: 1.8.1.9.,Thioredoxin-disulfide reductase.
CBU_1194	222189	NP_820189.1	29654497	7195	1137857	1139293	+	1139139	1139190	Spotted	CGCAACAGTCTAATCTAAAGGATTTAAAAGAAAGCACTAAACAGTTGGTTGA	861		-	5	5	0	0	0	0	0	0	0	6	6	5	1	0	575.833	563.5	132.321	CBU_1194	hypothetical protein (NCBI)
CBU_1195	222190	NP_820190.1	29654498	7195	1139355	1139606	+	1139564	1139606	Spotted	GGAAGCTGGAAAGAAACCTCCAACCTCAAAGGCAGAAGAATAA	862		-	10	10	0	0	2	1	0	9	0	195	126	61	43	6	429.969	342	249.826	infA	translation initiation factor IF-1 (NCBI)	361	J	Translation initiation factor 1 (IF-1)	GO:0006413,GO:0003723,GO:0003743
CBU_1196	222191	NP_820191.1	29654499	7195	1141930	1139669	-	1139734	1139783	Spotted	AAAAGTTCCCATTGCTAACCAACTGTTATTTAGCGAACTGAATGAGGGCG	863		-	10	9	0	1	0	5	0	2	1	155	88	15	2	0	301.652	268	137.288	clpA	ATP-dependent Clp protease, ATP-binding subunit ClpA (NCBI)	542	O	ATPases with chaperone activity, ATP-binding subunit	GO:0019538,GO:0003676,GO:0005515,GO:0005524,GO:0008026
CBU_1197	222192	NP_820192.1	29654500	7195	1141963	1142163	+	1142034	1142083	Spotted	CTGGCCGGAATCGATCTCTCCTTATTCTAAATGTAGTAAAGAGAACGGCG	864		-	3	3	0	0	0	0	0	0	0	3	3	3	0	0	604.333	613	69.407	CBU_1197	hypothetical protein (NCBI)
CBU_1198	222193	NP_820193.1	29654501	7195	1142253	1142789	+	1142740	1142789	Spotted	TTGCGCTTTCAATGAATTCAAAAGAACCATCCAATACGCGTTCTTTATAA	865		-	3	3	0	0	0	0	0	0	0	3	3	2	0	0	613.333	613	129.5	CBU_1198	hypothetical protein (NCBI)
CBU_1199	222194	NP_820194.1	29654502	7195	1142823	1142921	+	1142892	1142921	Spotted	GGTGCCCTGCACGGAAATGACGAAGCCTAG	866		-	3	3	0	0	0	0	0	0	0	3	3	2	0	0	566.333	531	161.918	CBU_1199	hypothetical protein (NCBI)
CBU_1200	222195	NP_820195.2	215919129	7195	1144244	1142958	-	1143113	1143162	Spotted	AGTCAATCCAGGCTCTCTAATTTTATCAGCAGAAATGATGCTCCGTTACC	867		-	10	8	0	0	6	5	6	4	0	179	113	24	10	5	344.721	294	182.321	icd	isocitrate dehydrogenase (RefSeq)	538	C	Isocitrate dehydrogenases	GO:0006099,GO:0004450	1.1.1.42	Isocitrate dehydrogenase (NADP(+)).
CBU_1201	222196	NP_820196.1	29654504	7195	1145319	1144288	-	1144386	1144435	Spotted	GTTGACAAATTTCCATTTACCGAAGTCTACATTATTAATGCTGGTGTGTG	868		-	10	10	0	1	0	0	0	6	0	194	136	49	6	1	386.603	355	183.271	queA	S-adenosylmethionine:tRNA ribosyltransferase-isomerase (NCBI)	809	J	S-adenosylmethionine:tRNA-ribosyltransferase-isomerase (queuine synthetase)	GO:0008616,GO:0003824	5.-.-.-
CBU_1202	222197	NP_820197.1	29654505	7195	1145436	1146287	+	1146141	1146190	Spotted	ATACTTCTTTATATGTTTAGTAACGGCCTTCACAACATATTGCGATGCGT	869		-	4	4	0	0	0	0	0	0	0	5	5	4	0	0	548.6	629	163.202	CBU_1202	hypothetical protein (NCBI)
CBU_1203	222198	NP_820198.1	29654506	7195	1146351	1148003	+	1147534	1147583	Spotted	GGTTTGACATGCTGACGAAAATTGCTTTAGGCGCAGATATTTTAAATAGC	870	184	operon	10	3	0	0	0	0	10	0	0	68	46	23	17	3	453.706	341	276.164	CBU_1203	hypothetical protein (NCBI)	69	E	Glutamate synthase domain 2	GO:0006537,GO:0009342,GO:0004355,GO:0016040	1.4.1.13,1.4.1.14	Glutamate synthase (NADPH).,Glutamate synthase (NADH).
CBU_1204	222199	NP_820199.2	215919130	7195	1148007	1149383	+	1148840	1148889	Spotted	TGATGAATTTAAAGCGCTCGTGATAGAGAAAGCTCAATCCTACCGGATGG	870	184	operon	10	6	0	0	0	0	8	0	0	119	61	12	9	1	312.908	254	184.814	CBU_1204	succinate-semialdehyde dehydrogenase (RefSeq)	1012	C	NAD-dependent aldehyde dehydrogenases	GO:0008152,GO:0009013,GO:0016491	1.2.1.16	Succinate-semialdehyde dehydrogenase (NAD(P)(+)).
CBU_1205					1149432	1149474		1149432	1149474	Spotted	AAAGGTGCTGGACGCTTTTGCTTCCTGTGTTTGTATTTATTAG	871		-	0	0	0	0	0	0	0	0	0
CBU_1206	222201	NP_820201.2	215919131	7195	1150863	1149484	-	1149862	1149911	Spotted	CTTTACTTTGTTTTGCATTATTGATCGGTGCTTATTATGTATGGGACACC	872		-	6	2	0	4	0	1	0	1	1	30	11	3	0	0	272.6	222.5	144.276	CBU_1206	delta(24(24(1)))-sterol reductase (RefSeq)				GO:0016020	1.3.1.71	Delta(24(24(1)))-sterol reductase.
CBU_1207	222202	NP_820202.1	29654510	7195	1151033	1150881	-	1150915	1150964	Spotted	GTGATAAACTTCGAAAGGAATAATGCGAGCGTATCATTACCTCCAAGCGC	873		-	2	2	0	0	0	0	0	0	0	2	2	2	0	0	635	635	83.4386	CBU_1207	hypothetical protein (NCBI)
CBU_1208	222203	NP_820203.1	29654511	7195	1151258	1152496	+	1152447	1152496	Spotted	TCGGAATTTCGTTAATGACTCGATTTAAACCAAAAGAGTCGGAGAGATAA	874		-	4	4	0	0	0	0	0	0	0	47	11	1	0	0	230.617	201	95.2239	CBU_1208	multidrug transporter, putative (NCBI)	2814	G	Arabinose efflux permease	GO:0006810,GO:0016021,GO:0005215
CBU_1209	222204	NP_820204.2	215919132	7195	1154050	1152509	-	1152591	1152640	Spotted	TTACAGCTTCTAGGGAACGAGGCTTGTGCTTTAGATACGAACGATGATAC	875		-	0	0	0	0	0	0	0	0	0	3	0	0	0	0	175.667	161	28.0416	CBU_1209	hypothetical membrane spanning protein (RefSeq)
CBU_1210	222205			7195	1156735	1154409	-	1154489	1154540	Spotted	TCATTTGACAATCTTGAAGATAAAGATGAAGAAGCCTTTAATCCCTCTTCAC	876		-	2	2	2	0	0	0	0	0	0	5	4	2	2	2	560.2	384	384.738	CBU_1210	hypothetical protein (RefSeq)
CBU_1211					1155397	1155446		1155397	1155446	Spotted	GCAACCCTTCTGTGATTAAAAGAGATGCAATTTCATTCACCGATCCCTGA	877		-	2	2	2	0	0	0	0	0	1	5	4	2	2	2	560.8	384	383.955
CBU_1212					1156675	1156726		1156675	1156726	Spotted	ACTAGAAAAGCAAGTTCACTGGTGACAGTATTAAAAGGAACAGACATAATTT	877		-	2	2	2	0	0	0	0	0	1	4	4	2	2	2	660.75	678	360.503
CBU_1212a	5437866	YP_002332989.1	215919133	7195	1156864	1157028	+					878		-	0	0	0	0	0	0	0	0	0									CBU_1212a	hypothetical protein (RefSeq)
CBU_1213	222208	NP_820208.1	29654516	7195	1157067	1159040	+	1158923	1158972	Spotted	AACTTGTACTGTTATTGTGGGTGGCGAATCAATATCAGGAGTTCATAGCC	879		-	10	1	0	9	0	0	0	0	0	56	30	12	0	0	346.875	274.5	198.914	CBU_1213	ankyrin repeat domain protein (NCBI)	666	R	FOG: Ankyrin repeat
CBU_1214	222209	NP_820209.1	29654517	7195	1159107	1159244	+	1159137	1159186	Spotted	TACTACTTGGAAAAGCTTAGAAAAGTTATTCGTCAACTTTCCGAGCGCCT	880		-	1	1	0	0	0	0	0	0	0	4	4	1	0	0	400.25	315	170.5	CBU_1214	hypothetical protein (NCBI)
CBU_1215	222210			7195	1161056	1159306	-	1159496	1159545	Spotted	TTAGATATAGATCAAGCCGAAAAGATTAGAAGTCACATACTGGCCCACTG	881		-	1	1	0	0	0	0	0	0	0	1	1	1	1	1	952	952	#DIV/0!	CBU_1215	hypothetical protein (RefSeq)
CBU_1216					1159868	1159919		1159868	1159919	Spotted	CCCGTCGATAAACAAAAGTTAGAGTTTATACTTGACCAAGTTACTCAAATCG	882		-	1	1	1	0	0	0	0	0	0	1	1	1	1	1	952	952	#DIV/0!
CBU_1216a	5437867	YP_002332990.1	215919134	7195	1161326	1161192	-					883		-	0	0	0	0	0	0	0	0	0									CBU_1216a	hypothetical protein (RefSeq)
CBU_1217	222212	NP_820212.1	29654520	7195	1161602	1163095	+	1163026	1163075	Spotted	AAAATCCTTTCGTGAAGAAAAGATCGAAGATACGGATTCATTCTCCTACG	884		-	2	1	1	1	0	0	0	0	1	31	4	1	0	0	210.387	177	107.667	CBU_1217	hypothetical protein (NCBI)	5184	DZ	Alpha-tubulin suppressor and related RCC1 domain-containing proteins
CBU_1217a	5437868	YP_002332991.1	215919135	7195	1163350	1164444	+					885		-	0	0	0	0	0	0	0	0	0									CBU_1217a	transposase (RefSeq)	3547	L	Transposase and inactivated derivatives	GO:0006313,GO:0004803,GO:0003677
CBU_1219	222214	NP_820214.1	29654522	7195	1165916	1164798	-	1164798	1164847	Spotted	CTCTTCAAGAGAACTCAAGTGTTCTTTCTAATGATTTAGCCATGGGATGA	886	185	operon	4	4	0	0	0	0	0	0	0	5	5	3	3	0	669.2	805	247.35	CBU_1219	hypothetical protein (NCBI)
CBU_1220	222215	NP_820215.1	29654523	7195	1166639	1165917	-	1166023	1166072	Spotted	ATCTATTTAGGAGATGAAATTAGTCCCGATTCTTGTCGCATTTGGGACGC	886	185	operon	10	10	2	2	1	0	4	7	0	170	115	39	13	7	381.253	306.5	210.973	purC	phosphoribosylaminoimidazole-succinocarboxamidesynthase (NCBI)	152	F	Phosphoribosylaminoimidazolesuccinocarboxamide (SAICAR) synthase	GO:0006164,GO:0004639,GO:0005524	6.3.2.6	Phosphoribosylaminoimidazolesuccinocarboxamide synthase.
CBU_1221	222216	NP_820216.1	29654524	7195	1167232	1166639	-	1166693	1166742	Spotted	AAGGAAATCAAACACAGGTGATTTTACTCAATAAGGATAATCAACCCGCC	886	185	operon	4	4	0	1	0	0	0	0	0	32	12	3	3	0	283.25	203	200.561	CBU_1221	lipoprotein, putative (NCBI)
CBU_1222	222217	NP_820217.2	215919136	7195	1168142	1167249	-	1167353	1167402	Spotted	ATTGTTTGTTGAATCCAATCCTATTCCGGTAAAATGGGCATTGTCTCAAA	886	185	operon	10	10	0	4	3	0	2	5	0	217	147	59	12	4	387.161	321	195.775	dapA	dihydrodipicolinate synthase (RefSeq)	329	EM	Dihydrodipicolinate synthase/N-acetylneuraminate lyase	GO:0019877,GO:0008840	4.2.1.52	Dihydrodipicolinate synthase.
CBU_1223	222218	NP_820218.1	29654526	7195	1169284	1168355	-	1168555	1168604	Spotted	TAAAGAAGTGGTCGTTAAGCAAGGGGAAAACGGTTATTGGTTATCGGATG	887		-	10	9	0	1	0	0	4	1	0	55	25	8	5	1	323.182	246	206.517	kdgK	2-dehydro-3-deoxygluconokinase (NCBI)	524	G	Sugar kinases, ribokinase family	GO:0008673	2.7.1.45	2-dehydro-3-deoxygluconokinase.
CBU_1224	222219	NP_820219.2	215919137	7195	1169324	1170604	+	1170502	1170553	Spotted	TCGGTTTAATAAAATCGAAAAGGTGGAATTAGATTTTCAAGACAACCAACCT	888		-	10	10	0	1	0	0	0	0	0	73	45	8	0	0	310.37	290	129.48	CBU_1224	RmuC family protein (RefSeq)	1322	S	Uncharacterized protein conserved in bacteria
CBU_1224a	5437869	YP_002332992.1	215919138	7195	1170906	1170709	-					889		-	0	0	0	0	0	0	0	0	0									CBU_1224a	hypothetical protein (RefSeq)
CBU_1225	222220	NP_820220.2	215919139	7195	1171925	1171017	-	1171017	1171066	Spotted	AATTGCGTAAATGGTATCTTAATGAAGTGAGATCAGTATCATTCGCCTGA	890	186	operon	6	5	1	0	0	0	0	0	0	32	14	4	1	0	284.25	215.5	156.42	CBU_1225	haloalkane dehalogenase (RefSeq)	596	R	Predicted hydrolases or acyltransferases (alpha/beta hydrolase superfamily)	GO:0003824,GO:0018786	3.8.1.5	Haloalkane dehalogenase.
CBU_1226	222221	NP_820221.2	215919140	7195	1176802	1171922	-	1172190	1172239	Spotted	TTATTTTGGTTCCGCGAAAGAATTAACGCCTATCCTGTTGACGATCAGTG	890	186	operon	10	10	0	0	0	0	0	0	0	68	36	9	1	0	308.691	258.5	146.676	CBU_1226	putative glutamate dehydrogenase, NAD-specific (RefSeq)	2902	E	NAD-specific glutamate dehydrogenase	GO:0004352	1.4.1.2	Glutamate dehydrogenase.
CBU_1227	222222	NP_820222.2	215919141	7195	1176990	1177688	+	1177594	1177643	Spotted	AAGTCCATATTCACAACTTACGCAAACGATTTGGGGCGAAACTAATACGC	891	187	operon	10	10	2	3	0	0	0	3	0	82	18	6	2	2	249.244	193.5	157.933	qseB	transcriptional regulatory protein (RefSeq)	745	TK	Response regulators consisting of a CheY-like receiver domain and a winged-helix DNA-binding domain	GO:0006355,GO:0000160,GO:0006810,GO:0016020,GO:0000156,GO:0003677,GO:0005215
CBU_1228	222223	NP_820223.1	29654531	7195	1177685	1179121	+	1179027	1179076	Spotted	TGCATAACGCAGAAATTGCCCTGAAAACACCTAACCATGGAAAAGGATTA	891	187	operon	10	10	3	4	0	0	0	3	0	58	22	7	2	1	281.034	217.5	168.349	CBU_1228	sensor histidine kinase (NCBI)	642	T	Signal transduction histidine kinase	GO:0016310,GO:0018106,GO:0007165,GO:0016020,GO:0000155,GO:0005524	2.7.13.3	Histidine kinase.
CBU_1229	222224	NP_820224.1	29654532	7195	1179351	1181939	+	1181879	1181928	Spotted	CAAAACTGTTTGTAAAGTCTGCCATTTACATTCGCTCTGCCGTATCGGAG	892	188	operon	5	4	0	2	0	0	0	0	0	32	18	3	1	1	300.844	286.5	170.18	CBU_1229	hypothetical protein (NCBI)
CBU_1230	222225	NP_820225.1	29654533	7195	1181936	1185268	+	1185162	1185211	Spotted	ATGCCCTTGATTCACGACCGATAAAACTAGGCCTTTATTTTCCACTTTGC	892	188	operon	8	6	0	3	0	0	0	0	0	32	18	5	1	1	329.875	285.5	192.066	CBU_1230	UvrD/REP helicase family protein (NCBI)	1074	L	ATP-dependent exoDNAse (exonuclease V) beta subunit (contains helicase and exonuclease domains)	GO:0006281,GO:0003677,GO:0004003,GO:0005524	3.6.1.-
CBU_1231	222226	NP_820226.2	215919142	7195	1186112	1185414	-	1185429	1185478	Spotted	ATGTAGTAACATCGGTGAATATAGGGCTAGAGATATTGGGTGGACTATTG	893		-	1	1	0	0	0	0	0	0	0	5	3	1	0	0	351.6	283	198.133	CBU_1231	hypothetical membrane associated protein (RefSeq)
CBU_1232					1186115	1186164		1186115	1186164	Spotted	TAACCCCTTATCGTCAGTATCTATCGCCCAATATAAACACAGCAGGATCG	894		-	2	2	0	0	0	0	0	0	0	5	3	1	0	0	387.4	332	195.213
CBU_1233	222228	NP_820228.2	215919143	7195	1186391	1187293	+	1186869	1186918	Spotted	TTGATGGCGATGCCGTTTTATTTTCAGACGAAGCCGAACAACTTTATCAA	895		-	10	0	0	0	0	0	10	1	0	57	40	21	19	1	493.842	360	300.786	CBU_1233	5'-nucleotidase (RefSeq)				GO:0009117,GO:0005737,GO:0000166,GO:0000287,GO:0017175,GO:0008253	3.1.3.5	5'-nucleotidase.
CBU_1234	222229	NP_820229.2	215919144	7195	1187356	1188642	+	1188587	1188638	Spotted	GCAATTCTCACTTTCAAATTAGTGTACAGCCTTTATGGGAATGGTTGTTAAA	896		-	9	2	0	7	0	0	0	0	5	22	15	4	0	0	357.682	338	146.809	CBU_1234	hypothetical ATPase (RefSeq)	1373	R	Predicted ATPase (AAA+ superfamily)
CBU_1235	222230	NP_820230.1	29654538	7195	1188801	1189352	+	1189275	1189324	Spotted	CTGGCTTTGCAAGATATTCGCGATTCCATCGAAGAACTTCGTTATTACCG	897		-	10	10	0	1	0	0	0	1	0	79	40	15	0	0	329.228	252	163.115	orn	oligoribonuclease (NCBI)	1949	A	Oligoribonuclease (3'->5' exoribonuclease)	GO:0005622,GO:0003676,GO:0004527	3.1.-.-
CBU_1236	222231	NP_820231.1	29654539	7195	1189529	1189621	+	1189554	1189605	Spotted	ACATGGGGTCTAATGTTTATAAACAACCTTATGAAGAATTTCCTTTTCTGCT	898		-	1	1	0	0	0	0	0	0	0	5	3	1	0	0	296	251	134.099	CBU_1236	hypothetical protein (NCBI)
CBU_1237	222232	NP_820232.2	215919145	7195	1190194	1189802	-	1189857	1189906	Spotted	ATTATTGCGGCAACTACCCAATGTATTTCCGCTAAACTGGTCACCTTAAA	899	189	operon	4	4	0	0	0	0	0	0	0	16	8	2	1	0	322.188	253.5	186.027	CBU_1237	PilT domain-containing protein (RefSeq)	1487	R	Predicted nucleic acid-binding protein, contains PIN domain
CBU_1238	222233	NP_820233.1	29654541	7195	1190451	1190197	-	1190197	1190248	Spotted	TCTCACTAAAATCCGAAAAGAGTTGGATAATCGGTTAAAAGACACAGAGTAA	899	189	operon	2	2	0	0	0	0	0	0	0	2	2	2	1	0	737.5	737.5	144.957	CBU_1238	transcriptional regulator, CopG family (NCBI)				GO:0006355,GO:0003677
CBU_1239	222234	NP_820234.1	29654542	7195	1190596	1191177	+	1191126	1191177	Spotted	GGAAAACTTTCAACGCTTACGAAAAGGTACAGAAGATAAAGTCAAATTGTGA	900		-	10	10	0	1	0	0	2	1	0	165	115	39	4	2	380.739	353	180.072	CBU_1239	hypothetical protein (NCBI)	344	S	Predicted membrane protein
CBU_1240	222235	NP_820235.1	29654543	7195	1192272	1191253	-	1191505	1191554	Spotted	TTGAGAACGCGGTCGTCGATACTTTAATTATTAAATGTTTACGAGCCTTG	901	190	operon	10	10	0	1	0	1	0	0	1	237	178	65	11	0	396.844	364	179.332	gcp	O-sialoglycoprotein endopeptidase (NCBI)	533	O	Metal-dependent proteases with possible chaperone activity	GO:0006508,GO:0008270,GO:0008450	3.4.24.57	O-sialoglycoprotein endopeptidase.
CBU_1241	222236	NP_820236.1	29654544	7195	1193267	1192281	-	1192353	1192402	Spotted	ATGGTGTCGTTAGCGTTATTGAGGAGATTGAACACAATGAATTTGGCCAG	901	190	operon	10	7	0	0	1	0	8	5	0	122	73	35	12	4	390.934	308.5	228.317	mdh	malate dehydrogenase (NCBI)	39	C	Malate/lactate dehydrogenases	GO:0006096,GO:0006108,GO:0016615,GO:0030060	1.1.1.37	Malate dehydrogenase.
CBU_1242	222237	NP_820237.1	29654545	7195	1194688	1193462	-	1193504	1193553	Spotted	CTGTGGATAATAGTTTTGCTGGCGTTACTTCATTAGGTGTTAATCGCCCG	902		-	4	4	0	0	0	0	0	0	0	38	10	2	0	0	240.895	195.5	126.556	CBU_1242	hypothetical protein (NCBI)	2067	I	Long-chain fatty acid transport protein
CBU_1243	222238	NP_820238.1	29654546	7195	1194822	1196066	+	1195698	1195747	Spotted	AACACCCACTTACGTCATTATCAATTGCAATTACGCCATTTAATCACGCG	903	191	operon	10	10	0	1	0	0	0	2	0	166	120	43	6	1	388.41	357	179.361	xseA	exodeoxyribonuclease VII, large subunit (NCBI)	1570	L	Exonuclease VII, large subunit	GO:0006308,GO:0009318,GO:0003676,GO:0008855	3.1.11.6	Exodeoxyribonuclease VII.
CBU_1244	222239	NP_820239.1	29654547	7195	1196063	1197598	+	1197524	1197573	Spotted	GTCATGCTCATGTGCTTTACAATGACAATCATTGGACTTATTGGGATATG	903	191	operon	3	3	0	0	0	0	0	0	0	29	11	2	1	0	263.483	186	159.521	CBU_1244	drug resistance transporter, EmrB/QacA subfamily, putative (NCBI)				GO:0006810,GO:0016021,GO:0005215
CBU_1245	222240	NP_820240.1	29654548	7195	1199069	1197738	-	1197837	1197886	Spotted	TACACGGCAAACAAACAAAATCATTGCCACAATCCTATTCTCGCTACCTC	904		-	10	10	1	1	0	0	0	2	1	275	183	69	12	1	375.815	328	185.059	CBU_1245	GTP-binding protein (NCBI)	1160	R	Predicted GTPases	GO:0005622,GO:0005525
CBU_1246					1199197	1199221		1199197	1199221	Spotted	CAAGGGGAATGTGCGAGCACGCCCC	905		-	1	1	0	0	0	0	0	0	0	1	1	1	0	0	653	653	#DIV/0!
CBU_1247	222242	NP_820242.1	29654550	7195	1199927	1199307	-	1199307	1199356	Spotted	AAGCGATGGGAATTAACGACCCCTATTTAACAATGAAAATTTCGCAATAA	906	192	operon	10	9	0	3	0	0	0	1	0	83	37	8	3	1	284.386	236	168.71	CBU_1247	hypothetical protein (NCBI)	2976	S	Uncharacterized protein conserved in bacteria
CBU_1248	222243	NP_820243.1	29654551	7195	1201215	1199950	-	1200158	1200207	Spotted	GTAATTCAAGAAGGGCTTTTGATGACGGAACAGCTTCGTAACGTATTGCC	906	192	operon	10	8	0	1	0	0	2	1	0	276	174	62	8	2	356.413	304.5	182.795	hisS	histidyl-tRNA synthetase (NCBI)	124	J	Histidyl-tRNA synthetase	GO:0006427,GO:0005737,GO:0004821,GO:0005524	6.1.1.21	Histidine--tRNA ligase.
CBU_1249	222244	NP_820244.1	29654552	7195	1201823	1201212	-	1201263	1201312	Spotted	ATTCAGTGAATACTAATAAAACGATCAACACAAATTTGACGGAGCAACCC	906	192	operon	7	6	0	1	0	0	0	1	0	32	10	6	3	1	305.656	200.5	227.801	CBU_1249	DNA-binding protein, putative (NCBI)				GO:0043565
CBU_1250	222245	NP_820245.1	29654553	7195	1202100	1201960	-	1201960	1202009	Spotted	CCATAAATGATAAAGCTTTCATTCTGGTATTATTTCCCCAAAGGCTTTGA	907		-	3	3	0	0	0	0	0	0	0	3	3	2	0	0	532.667	549	28.2902	CBU_1250	hypothetical protein (NCBI)
CBU_1251	2210054			7195	1202083	1202842	+					908		-	0	0	0	0	0	0	0	0	0									CBU_1251
CBU_1252	222246	NP_820246.1	29654554	7195	1204062	1202950	-	1203136	1203185	Spotted	ATTCTTTTCAAGGAACGGCTTATCGATGTTCAACAGAATCGGCTATTTCC	909		-	10	10	0	0	0	1	0	0	0	238	161	45	10	0	365.366	339	164.428	CBU_1252	radical SAM enzyme, Cfr family (NCBI)	820	R	Predicted Fe-S-cluster redox enzyme	GO:0003824,GO:0051536	2.1.1.-
CBU_1253	222247			7195	1204287	1206482	+	1204359	1204408	Spotted	AATCTTGTGAAAGCGGATAAACCCGAGAAAGAAAACATTGAGGTGCTCAG	910		-	2	2	0	0	0	0	0	0	0	2	2	1	0	0	524	524	73.5391	CBU_1253	hypothetical protein (RefSeq)
CBU_1254					1206411	1206460		1206411	1206460	Spotted	TTAACTGAGGAGGCTACGTTGCGTTTATTATCGAATGAAGCTAACGGTCG	911		-	10	0	0	10	0	0	0	0	0	45	17	10	0	0	326.178	201	213.85
CBU_1255	222249	NP_820249.1	29654557	7195	1207628	1206825	-	1206825	1206874	Spotted	AAGAACTAATTCATTTTCTCAAATCCTCTATCACCGCCGTCATTCAATGA	912		-	10	9	0	2	1	0	2	2	0	219	124	31	6	1	320.498	272	162.55	CBU_1255	geranyltranstransferase, putative (NCBI)	142	H	Geranylgeranyl pyrophosphate synthase	GO:0008299,GO:0004337	2.5.1.10	Geranyltranstransferase.
CBU_1256	222250	NP_820250.1	29654558	7195	1207660	1207776	+	1207664	1207713	Spotted	TTCAAAGCACTATCGAAAGCGTTCGTATTCTTAATTTAGTGCTTCTGTCG	913		-	0	0	0	0	0	0	0	0	0									CBU_1256	hypothetical protein (NCBI)
CBU_1257	222251	NP_820251.1	29654559	7195	1207769	1208173	+	1208083	1208132	Spotted	GTTTTCAGATCAGAAAATAGCTTTCCTTCACGAATACCGCATGACCCGAG	914		-	3	3	0	0	0	0	0	0	0	4	3	3	0	0	498	566	192.489	CBU_1257	hypothetical protein (NCBI)
CBU_1258	222252	NP_820252.1	29654560	7195	1208593	1208159	-	1208432	1208481	Spotted	AAATGTGTCATCTGAGTAAACCACAAGCAGAAAAGTTCTATGCGGTCCAC	915		-	10	7	0	0	0	2	10	4	0	306	236	94	38	18	430.222	361.5	223.997	ndk	nucleoside diphosphate kinase (NCBI)	105	F	Nucleoside diphosphate kinase	GO:0006241,GO:0006183,GO:0006228,GO:0004550,GO:0005524	2.7.4.6	Nucleoside-diphosphate kinase.
CBU_1259	222253	NP_820253.1	29654561	7195	1208729	1210327	+	1210259	1210308	Spotted	GAAGAAGTTTACATTCGTATTCTTTCCAAAATCGATCGCGATGAGGTGGG	916		-	5	5	0	0	0	0	0	0	0	50	23	2	0	0	269.56	244	106.826	CBU_1259	Na+/H+ antiporter (NCBI)	25	P	NhaP-type Na+/H+ and K+/H+ antiporters	GO:0006885,GO:0016021,GO:0015299
CBU_1260	222254	NP_820254.1	29654562	7195	1210764	1211510	+	1211460	1211509	Spotted	TACTTGCCTAACTTGAACGCAGTTACGCTGGGCTTAACTTACAAGTTCTA	917		-	5	3	0	2	0	0	0	0	0	36	12	5	0	0	252.806	178	135.502	CBU_1260	ompA-like transmembrane domain protein (NCBI)				GO:0009279,GO:0016021
CBU_1261	222255	NP_820255.1	29654563	7195	1211608	1212864	+	1212691	1212742	Spotted	GCGCCTATTTTGAAAGGACAGTCTTATGGCGAAATTAATGTGATCTTAAATG	918	193	operon	10	10	0	0	0	0	0	3	0	166	80	27	6	1	323.289	240	177.855	CBU_1261	D-alanyl-D-alanine carboxypeptidase (NCBI)	1686	M	D-alanyl-D-alanine carboxypeptidase	GO:0006508,GO:0004185,GO:0009002	3.4.16.4	Serine-type D-Ala-D-Ala carboxypeptidase.
CBU_1262	222256	NP_820256.1	29654564	7195	1212861	1213124	+	1213041	1213090	Spotted	ACGGTTCATGTGGAAAGTAAGCTAATTTTAGACAACCTCTACCAAGAGCT	918	193	operon	10	9	0	1	0	0	0	0	0	55	29	9	3	1	325.327	252	196.508	CBU_1262	hypothetical protein (NCBI)	2921	S	Uncharacterized conserved protein
CBU_1263	222257	NP_820257.1	29654565	7195	1213148	1213534	+	1213444	1213493	Spotted	TTGTCTTTCTTTCTGCTGTCTCTTTAGACGATCTCACAATGCAGAAGAAC	919		-	6	6	0	0	0	0	0	0	0	7	7	3	2	0	523.714	419	186.1	CBU_1263	hypothetical protein (NCBI)
CBU_1264	222258			7195	1213554	1214143	+	1214094	1214143	Spotted	CAATGATCTGGCCACTACACGCCTTACTCAGTAAAATAATGACACCATGA	920	194	operon	4	4	0	0	0	0	0	0	0	7	7	3	2	0	543.571	419	237.982	CBU_1264	hypothetical protein (RefSeq)
CBU_1265	222259	NP_820259.1	29654567	7195	1214140	1214868	+	1214819	1214868	Spotted	CAGAAAAGCTTGGGGAAAGAGAAACTGTCACGAATTCCCGTCAAAATTGA	920	194	operon	10	9	0	1	0	0	2	1	0	167	105	36	7	1	357.006	307	184.488	lipB	lipoate-protein ligase B (NCBI)	321	H	Lipoate-protein ligase B	GO:0006464,GO:0009107,GO:0003824	2.3.1.181,2.3.1.-	Lipoyl(octanoyl) transferase.,
CBU_1266	222260	NP_820260.1	29654568	7195	1214798	1215745	+	1215147	1215196	Spotted	TAAGTATCATGTCGTTAAGGTATGTCGTCATCACTTCAGTGGACCGTGAC	920	194	operon	10	10	0	3	1	1	1	6	0	182	118	45	12	1	375.907	305.5	197.048	lipA	lipoyl synthase (NCBI)	320	H	Lipoate synthase	GO:0009107,GO:0016992,GO:0051536	2.8.1.-,2.8.1.8	,Lipoyl synthase.
CBU_1267	222261	NP_820261.1	29654569	7195	1215856	1217904	+	1217682	1217731	Spotted	GGGTTCTATCAATTATCACATTGCCCCTAAACGGTTAATTACCTTGCGAA	921		-	9	9	0	1	0	0	0	0	0	41	22	4	0	0	300.951	255	125.774	CBU_1267	DedA/PAP2 domain protein (NCBI)	586	S	Uncharacterized membrane-associated protein	GO:0016020,GO:0016787
CBU_1267a	5437870	YP_002332993.1	215919146	7195	1217948	1218040	+					922		-	0	0	0	0	0	0	0	0	0									scvA	ScvA (RefSeq)
CBU_1268	222262	NP_820262.2	215919147	7195	1219169	1218096	-	1218232	1218281	Spotted	GAAATTAATTTATCTGACTATGACGTTTGCACGGGGATCATTGCCCCTGG	923	195	operon	3	3	0	0	0	0	0	0	0	9	4	1	1	0	315.222	198	204.753	CBU_1268	pyridine nucleotide-disulphide oxidoreductase (RefSeq)				GO:0006118,GO:0016491
CBU_1269	222263	NP_820263.1	29654571	7195	1219667	1219176	-	1219304	1219353	Spotted	TCATATTATATCGGCATACTTTACCTTTGTTGCGGTGGACGAAAATCGTA	923	195	operon	10	9	1	1	0	0	0	0	1	52	29	4	2	1	295.327	258.5	156.347	CBU_1269	long chain acyl-CoA thioester hydrolase family protein (NCBI)	1607	I	Acyl-CoA hydrolase		3.1.2.-
CBU_1269a	5437871	YP_002332994.1	215919148	7195	1219705	1220094	+					924		-	0	0	0	0	0	0	0	0	0									CBU_1269a	hypothetical protein (RefSeq)
CBU_1270	222264	NP_820264.2	215919149	7195	1221185	1220091	-					925		-	0	0	0	0	0	0	0	0	0									CBU_1270	IS1111A transposase (RefSeq)	3547	L	Transposase and inactivated derivatives	GO:0006313,GO:0003677,GO:0004803
CBU_1271	2210055			7195	1222823	1221199	-					926		-	0	0	0	0	0	0	0	0	0									CBU_1271
CBU_1272	222265	NP_820265.1	29654573	7195	1222977	1222861	-	1222918	1222967	Spotted	AACATACATTTGATCGAGAAGTGATAACCGCTGTTGGGGATGTTGAGATG	927		-	1	1	0	0	0	0	0	0	0	1	1	1	0	0	505	505	#DIV/0!	CBU_1272	hypothetical protein (NCBI)
CBU_1273	222266	NP_820266.1	29654574	7195	1223250	1224512	+	1224373	1224422	Spotted	TCACAGAAGCTTGCTATACGTATCTTAAACCTCTGATTGAAGGGGAAAGC	928		-	10	6	0	2	0	0	4	1	1	46	29	7	4	1	360.826	297.5	210.936	CBU_1273	6-phosphofructokinase (NCBI)	205	G	6-phosphofructokinase	GO:0006096,GO:0005945,GO:0003872	2.7.1.11	6-phosphofructokinase.
CBU_1274	222267	NP_820267.1	29654575	7195	1224996	1224514	-	1224793	1224842	Spotted	TTTCGGCTGATTCTCCTCACATTGTGCTTAAAATAAAGTCCAACCCAACC	929	196	operon	5	5	0	0	0	0	0	0	0	7	6	2	2	0	503.286	473	240.594	CBU_1274	hypothetical protein (NCBI)
CBU_1275	222268	NP_820268.1	29654576	7195	1226198	1224990	-	1224991	1225042	Spotted	GGGCTTATCTGCCGATTAATCGTAAGTTAGATGGAACTATGTATAATTGGTA	929	196	operon	10	10	0	0	0	0	0	0	0	35	19	7	4	0	348.857	261	203.799	RspA	starvation sensing protein rspA (NCBI)	4948	MR	L-alanine-DL-glutamate epimerase and related enzymes of enolase superfamily	GO:0008152,GO:0003824
CBU_1276	222269	NP_820269.2	215919150	7195	1227035	1226229	-	1226244	1226295	Spotted	GTTGGAACAATATCCAGTGATTGGCCGGAATTTAATTAATGAAATTCCATTA	929	196	operon	8	5	0	3	0	0	0	0	0	23	10	6	2	0	337.087	221	210.552	CBU_1276	short chain dehydrogenase/reductase family oxidoreductase (RefSeq)	1028	IQR	Dehydrogenases with different specificities (related to short-chain alcohol dehydrogenases)	GO:0008152,GO:0016491
CBU_1277	222270	NP_820270.2	215919151	7195	1227098	1227805	+	1227512	1227561	Spotted	ACGCCCTCTGAGATATTATTAGCGATTCAACACAAACTCTCTCTTTTAAA	930	197	operon	10	8	0	0	0	0	6	3	0	69	39	14	9	3	372.159	282	234.636	eda	2-dehydro-3-deoxyphosphogluconate aldolase/4-hydroxy-2-oxoglutarate aldolase (RefSeq)	800	G	2-keto-3-deoxy-6-phosphogluconate aldolase	GO:0008152,GO:0004451,GO:0008675,GO:0008700	4.1.2.14,4.1.3.1,4.1.3.16	2-dehydro-3-deoxy-phosphogluconate aldolase.,Isocitrate lyase.,4-hydroxy-2-oxoglutarate aldolase.
CBU_1278	222271	NP_820271.1	29654579	7195	1227816	1228373	+	1228292	1228341	Spotted	ATTGGATAATATATTAGCTGGAAACCTTGTCGATCCCAATCAACAACCCA	930	197	operon	10	10	0	0	0	0	0	0	0	81	56	14	2	0	349.827	317	156.552	CBU_1278	hypothetical protein (NCBI)	1225	O	Peroxiredoxin	GO:0016209,GO:0016491,GO:0051920	1.11.1.15	Peroxiredoxin.
CBU_1279	222272	NP_820272.1	29654580	7195	1228361	1228963	+	1228898	1228949	Spotted	GGAACGGCCCTTTATATAAGCTTTATGTATGTATTTATTTTCGGAGCGATTA	931		-	10	10	0	0	0	0	0	0	0	40	21	6	2	0	329.55	271	181.165	CBU_1279	proton transporter, putative (NCBI)	3932	R	Uncharacterized ABC-type transport system, permease components
CBU_1279a	5437872	YP_002332995.1	215919152	7195	1229009	1229131	+					932		-	0	0	0	0	0	0	0	0	0									CBU_1279a	hypothetical cytosolic protein (RefSeq)
CBU_1280	222273	NP_820273.2	215919153	7195	1229818	1229297	-	1229408	1229459	Spotted	CCAGATTATGGGCGTAGACGAAGCTAACCTCAAAGAAAATAAAATTTCAATT	933		-	10	9	0	2	0	3	0	3	0	288	188	56	5	0	351.944	307.5	171.256	greA	transcription elongation factor (RefSeq)	782	K	Transcription elongation factor	GO:0006355,GO:0003677,GO:0003711
CBU_1280a	5437873	YP_002332996.1	215919154	7195	1230040	1230279	+					934		-	0	0	0	0	0	0	0	0	0									CBU_1280a	hypothetical protein (RefSeq)
CBU_1281	222274	NP_820274.1	29654582	7195	1233550	1230329	-	1231000	1231049	Spotted	ATTTGCTATCCAGGAAAATGAAATTTATGTGCTTGAAGTTAATCCGCGCG	935	198	operon	10	8	2	2	4	2	9	6	0	216	148	50	12	8	383.088	326	201.563	carB	carbamoyl-phosphate synthase, large subunit (NCBI)	458	EF	Carbamoylphosphate synthase large subunit (split gene in MJ)	GO:0019856,GO:0006526,GO:0005737,GO:0004088,GO:0005524	6.3.5.5	Carbamoyl-phosphate synthase (glutamine-hydrolyzing).
CBU_1282	222275	NP_820275.2	215919155	7195	1234840	1233632	-	1233928	1233977	Spotted	TTTATTAGGCATTTGTTTGGGATTTCAATTGTTGGCATTAGCATGTGGCG	935	198	operon	10	7	2	1	4	1	8	5	1	267	195	64	12	5	390.176	353	183.387	carA	carbamoyl-phosphate synthase small chain (RefSeq)	505	EF	Carbamoylphosphate synthase small subunit	GO:0009058,GO:0006541,GO:0006807,GO:0004088,GO:0005524	6.3.5.5	Carbamoyl-phosphate synthase (glutamine-hydrolyzing).
CBU_1282a	5437874			7195	1234909	1236508	+					936		-	0	0	0	0	0	0	0	0	0									CBU_1282a
CBU_1284	222276	NP_820276.1	29654584	7195	1236614	1237924	+	1237619	1237668	Spotted	TATCTAAACTCAATGGTCACCGAAAATACTCTTGCAGAAGCATGCGTAGC	937	199	operon	7	2	6	0	0	0	0	0	2	35	16	6	1	0	311.686	244	195.682	CBU_1284	hypothetical protein (NCBI)	1373	R	Predicted ATPase (AAA+ superfamily)	GO:0000166,GO:0017111
CBU_1285	222277	NP_820277.1	29654585	7195	1237921	1239279	+	1239160	1239209	Spotted	GTCAGCAGCACTACTGACACTCGCATTTATACGCATTCCTTGTTTTATGG	937	199	operon	2	2	0	0	0	0	0	0	0	33	11	2	1	0	256.697	220	144.791	CBU_1285	transporter, putative (NCBI)				GO:0006810,GO:0016021,GO:0005215
CBU_1286	222278	NP_820278.1	29654586	7195	1239350	1240732	+	1240644	1240693	Spotted	CGAATGTGCTGACTCGAATTGATAGTATTCCTATTGAGCCCTTACCGCTG	938		-	8	2	0	7	0	0	0	0	5	0	0	0	0	0	#DIV/0!	#NUM!	#DIV/0!	CBU_1286	hypothetical protein (NCBI)	1373	R	Predicted ATPase (AAA+ superfamily)
CBU_1287	222279			7195	1242552	1240776	-	1240963	1241012	Spotted	AAAATCTATCACAGCAAAATCCGCGTTGGGAGAAATAAAATTCGACCTGC	939		-	2	2	1	0	0	0	0	0	0	5	5	1	1	1	433.8	307	281.035	CBU_1287	hypothetical protein (RefSeq)
CBU_1288					1242096	1242147		1242096	1242147	Spotted	GCTAACCGCCAAAACCCTATTATTGCTTCTCTTTATATCGTATTTAGGAGTT	940		-	2	2	1	0	0	0	0	0	0	5	5	2	1	1	505.6	393	258.663
CBU_1289	222281	NP_820281.1	29654589	7195	1243776	1242652	-	1242652	1242701	Spotted	GCACGCGAAACTGGTTTGACAGTGTGAAAGATTTCTTCACTTCCAAATAA	941	200	operon	10	8	0	2	6	6	0	7	0	286	172	49	8	3	338.685	296	169.358	dnaJ	chaperone protein dnaJ (NCBI)	484	O	DnaJ-class molecular chaperone with C-terminal Zn finger domain	GO:0006457,GO:0009408,GO:0005524,GO:0051082,GO:0031072
CBU_1290	222282	NP_820282.1	29654590	7195	1245889	1243919	-	1244761	1244810	Spotted	TTTCTTTGGCAAAGAAGCACGTAAAGATGTAAATCCTGATGAAGCCGTTG	941	200	operon	10	7	0	3	6	8	0	10	0	331	206	62	15	6	344.918	296	183.259	dnaK	chaperone protein dnak (NCBI)	443	O	Molecular chaperone	GO:0006457,GO:0005524,GO:0051082
CBU_1291	222283	NP_820283.1	29654591	7195	1246055	1246648	+	1246599	1246648	Spotted	GATTGCAAATAGGATCTGCATTGCATAAATCACCCACACTTAGTCGATAA	942	201	operon	3	3	0	0	0	0	0	0	0	24	9	2	1	0	271	206.5	168.635	CBU_1291	hypothetical protein (NCBI)
CBU_1292	222284	NP_820284.1	29654592	7195	1246651	1248048	+	1247969	1248018	Spotted	ATGTTTATAACCGTTCCACGTATGTCGGGCAAAATTTACAACGCTTGTTG	942	201	operon	10	2	0	8	0	0	0	0	0	50	22	11	1	0	336.12	245	205.417	CBU_1292	ankyrin repeat domain protein (NCBI)	666	R	FOG: Ankyrin repeat
CBU_1293	222285	NP_820285.2	215919156	7195	1248804	1248178	-	1248243	1248292	Spotted	GTCTGTCCAAGCAGTACCTGATGCAAAACCAGATACGATTATTCAAGTAC	943		-	10	10	0	3	6	8	0	9	0	245	156	42	9	4	353.755	319	178.471	grpE	co-chaperone GrpE (RefSeq)	576	O	Molecular chaperone GrpE (heat shock protein)	GO:0006457,GO:0000774,GO:0042803,GO:0051087
CBU_1294	222286	NP_820286.1	29654594	7195	1249236	1248859	-	1248874	1248924	Spotted	GCCACCAGTAATAACAAGCACTTTAAATGCATCAAAGACTTGCAATTCAAT	944	202	operon	4	4	0	0	0	0	0	0	0	16	5	4	1	0	317.688	188.5	243.579	CBU_1294	PIN domain protein (NCBI)	1487	R	Predicted nucleic acid-binding protein, contains PIN domain
CBU_1295	222287	NP_820287.1	29654595	7195	1249555	1249226	-	1249338	1249387	Spotted	CTCTATCATGGTAAAGTGAAAGGGACAATTCTTCCTTATCGAAAGCCCAG	944	202	operon	4	4	0	0	0	0	0	0	0	4	4	4	1	0	716	669.5	102.238	CBU_1295	hypothetical protein (NCBI)
CBU_1296	222288	NP_820288.1	29654596	7195	1249565	1250464	+	1250377	1250426	Spotted	ATTGCACCTTATTCACCCCACTGATTACAATTATTACGACACATTGCGCC	945	203	operon	10	5	1	1	0	0	5	1	0	221	159	62	9	2	391.805	339	189.893	CBU_1296	hypothetical protein (NCBI)	61	G	Predicted sugar kinase	GO:0008152,GO:0003951	2.7.1.23	NAD(+) kinase.
CBU_1297	222289	NP_820289.1	29654597	7195	1250469	1252139	+	1251470	1251519	Spotted	AAAGCTCGAAAATATTGAAGAGCAAATTCAGAGCTTAAAACAACGCCGGG	945	203	operon	10	7	1	1	1	0	5	1	0	231	161	62	7	2	389.16	364	184.249	recN	DNA repair protein RecN (NCBI)	497	L	ATPase involved in DNA repair	GO:0006281,GO:0006310,GO:0005694,GO:0005524,GO:0016887
CBU_1298	222290			7195	1254128	1252352	-	1252352	1252403	Spotted	AGGAATAAATCTCCCAGAAAATAAGAGTATTGTTTCTGCACGGAAAATTTGA	946		-	1	1	1	0	0	0	0	0	0	4	4	1	0	0	388.5	309	195.96	CBU_1298	hypothetical protein (RefSeq)
CBU_1299					1253064	1253113		1253064	1253113	Spotted	TATTGTTTCGTGTTAGCCGAACTGAGAGACCTGTGTTTGACGATCAAGAA	947		-	3	3	1	0	0	0	0	0	0	4	4	1	0	0	457.5	412.5	154.083
CBU_1300	222292	NP_820292.1	29654600	7195	1254621	1254274	-	1254331	1254380	Spotted	ATGATTATGCTTGCCGACAAGTAACTTACGTTCGTCATTGCCGATACAAC	948		-	3	3	0	0	0	0	0	0	0	4	4	2	1	0	545.25	518.5	228.348	CBU_1300	hypothetical protein (NCBI)
CBU_1301	222293	NP_820293.1	29654601	7195	1255099	1254632	-	1254714	1254763	Spotted	GCGAAGAAATCTAAATTCAGAATGACGGACCATAACCTGACGATTTATGG	949		-	10	9	0	0	0	3	0	2	0	176	103	23	3	0	330.08	290.5	157.609	fur	ferric uptake regulation (NCBI)	735	P	Fe2+/Zn2+ uptake regulation proteins	GO:0006355,GO:0003700
CBU_1302	222294	NP_820294.1	29654602	7195	1255226	1255606	+	1255474	1255523	Spotted	TACGCGCCTAATTGTGTATTTACGTGATAATCGTGTCGTGAGTTTCTGGA	950		-	7	4	0	3	0	0	0	0	0	40	16	6	1	0	287.925	224.5	161.131	CBU_1302	small membrane protein A, putative (NCBI)	2913	J	Small protein A (tmRNA-binding)	GO:0019867
CBU_1303	222295	NP_820295.1	29654603	7195	1255855	1255550	-	1255676	1255725	Spotted	ATTTATCTCAAGCGATCGTCGGCATTCATAATAAACGTACGGCACTCGAT	951	204	operon	10	9	0	2	0	0	0	1	0	77	39	11	3	2	331.558	254	191.912	CBU_1303	hypothetical protein (NCBI)	2914	S	Uncharacterized protein conserved in bacteria
CBU_1304	222296	NP_820296.1	29654604	7195	1256292	1255852	-	1256033	1256082	Spotted	CATAGAATGATAGAAATCCAGCTAATCAATGGGCCTTTTCGGCAATTGGA	951	204	operon	10	10	0	0	0	0	0	0	0	97	64	15	2	1	363.567	345	175.55	CBU_1304	hypothetical protein (NCBI)	2867	I	Oligoketide cyclase/lipid transport protein
CBU_1305	222297	NP_820297.1	29654605	7195	1256319	1256798	+	1256551	1256600	Spotted	AATATATGAAAGCTGACCCTCAACGTTCGCGGAAATTGCTTTTGAACAAG	952	205	operon	10	10	0	4	0	0	0	2	0	272	187	81	13	1	394.882	358.5	188.508	smpB	SsrA-binding protein (NCBI)	691	O	tmRNA-binding protein	GO:0006412,GO:0003723
CBU_1306	222298	NP_820298.1	29654606	7195	1256791	1257645	+	1257497	1257546	Spotted	CAATAAAGGTGTTAACGGAAAAGGGTTATCGCATTGCCACTCGATTAGCG	952	205	operon	10	10	0	1	0	1	0	2	0	204	115	19	2	1	306.461	270	139.011	msrA	bifunctional methionine sulfoxide reductase A/B protein (NCBI)	225	O	Peptide methionine sulfoxide reductase	GO:0019538,GO:0008113	1.8.4.11,1.8.4.6	Peptide-methionine (S)-S-oxide reductase.,Transferred entry: 1.8.4.11.
CBU_1307	222299	NP_820299.2	215919157	7195	1258062	1257646	-	1257702	1257751	Spotted	CAATTGCGGTTGTGAATCGGATTATCGTCAATGTTATTCCAATTGTGGCG	953		-	3	2	0	1	0	0	0	0	0	26	6	0	0	0	222.962	177.5	96.7919	CBU_1307	hypothetical membrane associated protein (RefSeq)
CBU_1308	222300	NP_820300.1	29654608	7195	1258425	1259090	+	1259028	1259079	Spotted	CCGATGGTTAAGAAAATATTTAGCCAACGAAAAGCATTTAATCCTTCTGTCA	954		-	2	2	0	0	0	0	0	0	0	14	4	0	0	0	227.714	176.5	104.345	CBU_1308	hypothetical protein (NCBI)	4341	R	Predicted HD phosphohydrolase
CBU_1308a	5437875			7195	1260480	1259932	-					955		-	0	0	0	0	0	0	0	0	0									hetM
CBU_1310	222301	NP_820301.1	29654609	7195	1260838	1260734	-	1260759	1260801	Spotted	ACGGATATACTGCGCGATCGATTATAGGGGAAATAGGCGAAGA	956		-	2	2	0	0	0	0	0	0	0	3	2	2	1	0	522.333	559	264.91	CBU_1310	hypothetical protein (NCBI)
CBU_1311	222302	NP_820302.1	29654610	7195	1263306	1260865	-	1260922	1260971	Spotted	GACTACGACAGCTCTATTGCCATATGTTAAAATTACACTCTGCTGGAGAC	957		-	2	2	0	0	0	0	0	0	0	3	2	2	1	0	545	627	272.419	CBU_1311	hypothetical protein (NCBI)				GO:0006355,GO:0005634
CBU_1312	222303	NP_820303.1	29654611	7195	1263468	1263581	+	1263533	1263574	Spotted	AGTGAGCTTGAAAAGTGAAGAATGTCAGAAAATTGAATGCTT	958		-	2	2	0	0	0	0	0	0	0	2	2	2	0	0	593	593	48.0833	CBU_1312	hypothetical protein (NCBI)
CBU_1313	222304	NP_820304.1	29654612	7195	1263837	1263712	-	1263712	1263761	Spotted	TTAGTATGGAACGTTCACTCAAGTTTGCACTCAAACAAAATAGCAATTAG	959		-	1	1	0	0	0	0	0	0	0	1	1	0	0	0	486	486	#DIV/0!	CBU_1313	hypothetical protein (NCBI)
CBU_1314	222305	NP_820305.2	215919158	7195	1264690	1264046	-	1264301	1264350	Spotted	TACGCAATAGGAGACGAGAGGAAAGACAAGGTAATATCCAACCTCTCTTT	960		-	1	1	0	0	0	0	0	0	0	3	1	0	0	0	322.667	241	141.451	CBU_1314	hypothetical cytosolic protein (RefSeq)
CBU_1314a	5437876			7195	1265150	1265007	-					961		-	0	0	0	0	0	0	0	0	0									CBU_1314a
CBU_1316	222306	NP_820306.1	29654614	7195	1265610	1265383	-	1265383	1265432	Spotted	CTGGGTTTCAGTTAGAGCACGCCCATTTTCTGAAATCGAAGCATATTTAG	962		-	1	1	0	0	0	0	0	0	0	7	2	1	0	0	269.429	218	118.806	CBU_1316	hypothetical protein (NCBI)
CBU_1316a	5437877	YP_002332997.1	215919159	7195	1265634	1265741	+					963		-	0	0	0	0	0	0	0	0	0									CBU_1316a	hypothetical protein (RefSeq)
CBU_1317	222307	NP_820307.1	29654615	7195	1265893	1265765	-	1265862	1265891	Spotted	GTCAGATAGCTATCGTGGCGGCCCTTTTCG	964		-	2	2	0	0	0	0	0	0	0	7	6	1	0	0	328	279	105.965	CBU_1317	hypothetical protein (NCBI)
CBU_1318	222308	NP_820308.1	29654616	7195	1266876	1266253	-	1266265	1266316	Spotted	TGTCGATCTTTCTCATCAGCTAGAAAGGTTTGACCTATTACCTAATGTATTT	965		-	5	5	0	0	0	0	0	0	0	7	7	0	0	0	439.286	494	80.2137	CBU_1318	hypothetical protein (NCBI)
CBU_1319	222309	NP_820309.2	215919160	7195	1267403	1267068	-	1267120	1267169	Spotted	GAAGAATCTTCCAAAGATAAGCAAGAACACAAAGTTTACGAAACGATGCG	966	206	operon	10	10	0	0	0	0	0	0	0	64	33	12	5	3	349.094	258.5	228.819	CBU_1319	transcriptional regulator domain protein (RefSeq)	789	K	Predicted transcriptional regulators	GO:0006355,GO:0005634,GO:0000166,GO:0003700
CBU_1320	222310	NP_820310.1	29654618	7195	1267728	1267417	-	1267547	1267596	Spotted	AAATTATCTGGCTTTGGTAATTTCAATTTGCGCGATAAAGGCGAACGACC	966	206	operon	10	10	0	1	0	1	0	3	1	82	36	9	4	3	303.329	230.5	188.186	ihfA	integration host factor, alpha subunit (NCBI)	776	L	Bacterial nucleoid DNA-binding protein	GO:0005694,GO:0003677
CBU_1321	222311	NP_820311.1	29654619	7195	1270111	1267733	-	1267778	1267827	Spotted	CTTCGCGCACTCTAATAGATGGAGAAGTAAAACAAATCATTGAGCGCGTG	966	206	operon	10	9	0	2	1	1	2	0	0	225	147	45	9	5	362.311	302	186.684	pheT	phenylalanyl-tRNA synthetase, beta subunit (NCBI)	72	J	Phenylalanyl-tRNA synthetase beta subunit	GO:0006432,GO:0008033,GO:0009328,GO:0000049,GO:0000287,GO:0004826,GO:0005524	6.1.1.20	Phenylalanine--tRNA ligase.
CBU_1322	222312	NP_820312.1	29654620	7195	1271097	1270111	-	1270417	1270468	Spotted	GGAAGGGTTAGTAATCGATAAAAGATCCACGTTTGCTAATTTAAAAGGGTTA	966	206	operon	10	10	0	0	2	1	2	4	0	264	171	52	9	7	360.083	312	184.199	pheS	phenylalanyl-tRNA synthetase, alpha subunit (NCBI)	16	J	Phenylalanyl-tRNA synthetase alpha subunit	GO:0006432,GO:0009328,GO:0004826,GO:0005524	6.1.1.20	Phenylalanine--tRNA ligase.
CBU_1323	222313	NP_820313.1	29654621	7195	1271533	1271174	-	1271259	1271301	Spotted	GTTTGATTAATGGCTTAATGAAAGCATCCGTTGCCATCGATCG	966	206	operon	10	9	0	1	5	7	0	4	0	247	142	52	35	7	375.583	285	233.345	rplT	50S ribosomal protein L20 (NCBI)	292	J	Ribosomal protein L20	GO:0006412,GO:0005840,GO:0003723,GO:0003735
CBU_1323a	5437878	YP_002332998.1	215919161	7195	1271991	1272092	+					967		-	0	0	0	0	0	0	0	0	0									CBU_1323a	hypothetical cytosolic protein (RefSeq)
CBU_1324	222314	NP_820314.1	29654622	7195	1272367	1272173	-	1272288	1272337	Spotted	GTGAAACGATTTAAAGTTACAGGTTCTGGTAAAATTAAACGGGCAGCGTC	968	207	operon	10	10	0	0	0	0	0	2	0	55	21	7	5	2	309.309	228	212.558	rpmI	ribosomal protein L35 (NCBI)	291	J	Ribosomal protein L35	GO:0006412,GO:0005840,GO:0003735
CBU_1325	222315	NP_820315.1	29654623	7195	1272857	1272348	-	1272348	1272398	Spotted	GGTGAAGGTAATAAAACGAAGAGAGAAGATCATGCCGAAATTAAAGACTAA	968	207	operon	10	8	0	0	3	7	0	5	0	238	141	38	17	4	338.458	274.5	192.089	infC	translation initiation factor IF-3 (NCBI)	290	J	Translation initiation factor 3 (IF-3)	GO:0006413,GO:0003743
CBU_1326	222316	NP_820316.2	215919162	7195	1274923	1272941	-	1273136	1273185	Spotted	ACTTGAGAAATGAGAAGATCGGCTTTAAAATCCGCGAACACACTATTGCG	968	207	operon	10	8	0	0	1	1	1	6	0	249	154	56	8	3	358.406	306	185.356	thrS	threonyl-tRNA synthetase (RefSeq)	441	J	Threonyl-tRNA synthetase	GO:0006435,GO:0005737,GO:0004829,GO:0005524	6.1.1.3	Threonine--tRNA ligase.
CBU_1327					1274911	1274960		1274911	1274960	Spotted	CCCCAAATTGTCAAATTGATAGCGGGATGTTACTATCATGCGTTCTTTAA	969		-	0	0	0	0	0	0	0	0	0
CBU_1328	222318	NP_820318.1	29654626	7195	1275011	1275283	+	1275178	1275227	Spotted	TAATTGGATCAGTAAAATTGAAGAAGCGCTAGGGAATAGCATCCCAGTGG	970		-	3	3	0	0	0	0	0	0	0	3	3	1	0	0	534	477	98.7269	CBU_1328	hypothetical protein (NCBI)
CBU_1329	222319	NP_820319.1	29654627	7195	1276360	1275290	-	1275533	1275582	Spotted	TCCGCTTGCCCTATGAAGTAAAAGATTTATTCAAGGAATGGTTGGAACAG	971		-	8	8	0	0	0	0	0	0	0	58	32	2	0	0	277.155	266	105.806	CBU_1329	hypothetical protein (NCBI)	1533	L	DNA repair photolyase	GO:0006508,GO:0004182,GO:0008270,GO:0051536
CBU_1330	2210061			7195	1277695	1276380	-					972		-	0	0	0	0	0	0	0	0	0									CBU_1330
CBU_1331	222320	NP_820320.2	215919163	7195	1277933	1278310	+	1278139	1278188	Spotted	CACCAAACGAATGGAAAGAAAGCAAATCCATCGACTGATCGTACTCAACG	973		-	5	5	0	0	0	0	0	0	0	17	7	2	2	0	328.765	222	224.248	CBU_1331	CBS domain-containing protein (RefSeq)	517	R	FOG: CBS domain
CBU_1332	222321	NP_820321.1	29654629	7195	1278298	1278450	+	1278356	1278405	Spotted	ATTTCATTGCGTTAGCTATTGAATCCAAGCTCAATACCCCTTATTGTAGC	974		-	2	2	0	0	0	0	0	0	0	2	2	2	2	0	845.5	845.5	33.234	CBU_1332	hypothetical protein (NCBI)
CBU_1332a	5437879	YP_002332999.1	215919164	7195	1278374	1278481	+					975		-	0	0	0	0	0	0	0	0	0									CBU_1332a	hypothetical protein (RefSeq)
CBU_1333	222322	NP_820322.1	29654630	7195	1278463	1279254	+	1279205	1279254	Spotted	TAGTTTATGCCGGTTTGTTATGCGTAGTAGGGGTTTTAATGTTGTGCTGA	976		-	10	10	0	0	0	0	0	0	0	47	19	8	2	0	299.596	213	179.227	CBU_1333	hypothetical protein (NCBI)	730	R	Predicted permeases	GO:0016021
CBU_1334	222323	NP_820323.1	29654631	7195	1280342	1279209	-	1279209	1279258	Spotted	ACAATCAGCACAACATTAAAACCCCTACTACGCATAACAAACCGGCATAA	977		-	1	1	0	1	0	0	0	0	0	25	3	0	0	0	197.84	182	61.6405	CBU_1334	hypothetical protein (NCBI)
CBU_1335	222324	NP_820324.1	29654632	7195	1280843	1281991	+	1281942	1281991	Spotted	ACAATCGAGAAAATTCGAGGCGTTCTCTATCAGGATTCTCAAAATCATGA	978		-	5	1	0	5	0	0	0	0	0	45	13	2	0	0	242.956	190	123.088	CBU_1335	hypothetical protein (NCBI)
CBU_1336	222325	NP_820325.1	29654633	7195	1282903	1281986	-	1281986	1282035	Spotted	AAGATAACAATCCGTTGTCAGAAACGTACGCTTCAGAATCCAAATCATGA	979		-	10	10	0	0	0	0	0	0	0	92	39	6	0	0	274.543	225	126.193	CBU_1336	hypothetical protein (NCBI)	5006	R	Predicted permease, DMT superfamily	GO:0016020
CBU_1337	222326	NP_820326.1	29654634	7195	1286443	1283012	-	1283048	1283099	Spotted	CGAGACTTGGAGAGTGAAACTGGATGATAAGTTATTGAGTGAATTGAGTAAA	980	208	operon	10	6	0	0	2	5	9	6	0	273	193	94	19	8	416.187	363	212.654	dnaE	DNA polymerase III, alpha subunit (NCBI)	587	L	DNA polymerase III, alpha subunit	GO:0006260,GO:0005737,GO:0003677,GO:0003893,GO:0016448,GO:0016452,GO:0003889,GO:0003894,GO:0008408,GO:0016449,GO:0019984,GO:0003890,GO:0003895,GO:0015999,GO:0016450,GO:0003891,GO:0016000,GO:0016451	2.7.7.7	DNA-directed DNA polymerase.
CBU_1338	222327	NP_820327.2	215919165	7195	1287566	1286445	-	1286445	1286494	Spotted	AGCAGCAGAAATTGATACGGTGTTATGAAGTAAAGGCAAGGAGTTTGTAA	980	208	operon	10	10	0	0	0	0	2	7	0	209	135	46	16	5	370.737	303	203.211	CBU_1338	D-alanine--D-alanine ligase (RefSeq)	1181	M	D-alanine-D-alanine ligase and related ATP-grasp enzymes	GO:0009252,GO:0005618,GO:0005737,GO:0005524,GO:0008716	6.3.2.4	D-alanine--D-alanine ligase.
CBU_1339	222328	NP_820328.1	29654636	7195	1288321	1287713	-	1287865	1287914	Spotted	AGCGTCCATTTTGGCAAAAGTTACGCGTGATCGAGAAATGCTAAAATATG	981		-	10	10	0	1	2	1	0	2	0	258	187	87	15	1	417.488	401.5	192.758	rnhB	ribonuclease HII (NCBI)	164	L	Ribonuclease HII	GO:0003723,GO:0004523	3.1.26.4	Ribonuclease H.
CBU_1340	222329	NP_820329.2	215919166	7195	1288629	1288333	-	1288473	1288522	Spotted	AGGAATGCTGCGAAAAGAAAGTCTCGAAATATTTGCGATTAATGACTTAC	982		-	6	6	0	0	0	0	0	0	0	10	10	6	2	0	534	512	203.158	CBU_1340	hypothetical protein (RefSeq)
CBU_1341	222330	NP_820330.1	29654638	7195	1290190	1288616	-	1288636	1288685	Spotted	AATTAAAGAAGTCTCCCGCGTTGTTTATGACATGACTAATAAACCGCCGG	983	209	operon	10	7	0	1	4	0	9	8	1	237	159	58	21	10	391.882	330	215.821	guaA	GMP synthase (NCBI)	519	F	GMP synthase, PP-ATPase domain/subunit	GO:0006177,GO:0006541,GO:0008033,GO:0005737,GO:0003922,GO:0004808,GO:0005524	6.3.5.2	GMP synthase (glutamine-hydrolyzing).
CBU_1342	222331	NP_820331.1	29654639	7195	1291696	1290227	-	1290227	1290276	Spotted	ACGATGTAACCGTTACCAAAGAATCACCGAATTATTCAGTAGAAGAGTAG	983	209	operon	10	8	0	2	2	0	6	4	0	233	154	49	9	4	367.94	324	186.75	guaB	inosine-5'-monophosphate dehydrogenase (NCBI)	516	F	IMP dehydrogenase/GMP reductase	GO:0006177,GO:0003938	1.1.1.205	IMP dehydrogenase.
CBU_1343	222332			7195	1293274	1291790	-	1291846	1291890	Spotted	CGGATGAGCATTTAGATGCCCTTTATGAGATCGTTAAAACTGAAT	984		-	7	7	1	0	0	0	0	0	0	10	10	4	1	1	494	486.5	183.221	CBU_1343	hypothetical protein (RefSeq)
CBU_1344					1292589	1292638		1292589	1292638	Spotted	AGACAAAGAATAATAAATCGATTGAAAGAAATCCGATCTATGCTTCCGGG	985		-	4	4	1	0	0	0	0	0	0	10	9	3	1	1	459.4	390.5	219.316
CBU_1345	222334	NP_820334.1	29654642	7195	1293369	1294658	+	1294607	1294658	Spotted	TTTCTTCTATCATAGGCAAAGAAAAGAACAACTTAGCGGTGTTTTAGAGTAG	986		-	3	3	0	1	0	0	0	0	0	25	9	2	1	1	274.36	199	183.946	CBU_1345	major facilitator family transporter (NCBI)	738	G	Fucose permease	GO:0006810,GO:0016021,GO:0005215
CBU_1346	222335	NP_820335.2	215919167	7195	1294909	1296291	+	1295747	1295798	Spotted	TGCAATACTGTTGGGACACCGATAAACAATTTTATTTTGATTATTGTTGGAC	987		-	4	3	0	1	0	0	0	1	0	30	14	2	1	1	290	237	168.488	CBU_1346	trehalase (RefSeq)	1626	G	Neutral trehalase	GO:0005991,GO:0004555	3.2.1.28	Alpha,alpha-trehalase.
CBU_1347	222336	NP_820336.1	29654644	7195	1297626	1296202	-	1296329	1296378	Spotted	ATAACGACATTAATTATTGGTTTTATTCCGCCGAATAACATTGCTGTTGG	988		-	1	1	0	0	0	0	0	0	0	13	4	1	0	0	246.308	189	128.601	CBU_1347	amino acid antiporter (NCBI)	531	E	Amino acid transporters	GO:0006865,GO:0016020,GO:0015171
CBU_1348	222337	NP_820337.1	29654645	7195	1297839	1298006	+	1297873	1297902	Spotted	CACGCTGTGAATCCATCCGTGGACGCTCAG	989		-	2	2	0	0	0	0	0	0	0	2	2	2	0	0	574	574	21.2132	CBU_1348	hypothetical protein (NCBI)
CBU_1349	222338	NP_820338.2	215919168	7195	1298083	1299822	+	1299670	1299719	Spotted	AAGCGGACTTATGAAACTTTCACTAAAATCTGTATTGAATGCAACGAATT	990		-	1	1	0	0	0	0	0	0	0	2	2	1	0	0	479	479	113.137	CBU_1349	hypothetical cytosolic protein (RefSeq)
CBU_1350	222339	NP_820339.1	29654647	7195	1301275	1299935	-	1300368	1300417	Spotted	AATTTAGGTTTGGAGCATACCTTAAAGCGGCATCATATTGCTTTTGAGCG	991	210	operon	10	9	0	3	0	1	2	7	0	244	156	39	6	4	351.287	334.5	172.937	glmM	phosphoglucosamine mutase (NCBI)	1109	G	Phosphomannomutase	GO:0005975,GO:0008966	5.4.2.10,5.4.2.-	Phosphoglucosamine mutase.,
CBU_1351	222340	NP_820340.1	29654648	7195	1302257	1301364	-	1301445	1301494	Spotted	GAAGTATCGCGGCTGATGTATTAGCTGTTTACCATGGTGCGTCAATAATC	991	210	operon	10	10	2	2	0	0	4	10	0	210	138	53	11	7	384.286	355	202.511	folP	dihydropteroate synthase (NCBI)	294	H	Dihydropteroate synthase and related enzymes	GO:0009396,GO:0004156	2.5.1.15	Dihydropteroate synthase.
CBU_1352	222341	NP_820341.1	29654649	7195	1304252	1302309	-	1302448	1302497	Spotted	GAAACCATTGGTGAGGCTCAAATTAAGGAAATTCTAGCGGGTAAAGAGCC	991	210	operon	10	10	0	3	1	0	0	6	0	294	206	88	15	4	395.793	362	193.92	ftsH	ATP-dependent metalloprotease FtsH (NCBI)	465	O	ATP-dependent Zn proteases	GO:0006508,GO:0030163,GO:0016021,GO:0004222,GO:0005524,GO:0017111,GO:0008270	3.4.24.-
CBU_1353	222342	NP_820342.1	29654650	7195	1304910	1304272	-	1304467	1304516	Spotted	ATGTCGATCAATCAAGATCGCTGCATTTAGTCGAATTAGCTTGGGATTGC	991	210	operon	10	10	0	0	2	0	0	4	0	147	107	38	11	1	400.646	344	202.849	rrmJ	ribosomal RNA large subunit methyltransferase J (NCBI)	293	J	23S rRNA methylase		2.1.1.-
CBU_1354	222343	NP_820343.1	29654651	7195	1305474	1304932	-	1305145	1305194	Spotted	AAATCCCGGTGAATATTGTGGATTTAGGTTTAGTGTATACCTGCGATATT	992	211	operon	10	10	0	1	0	0	0	0	0	101	67	28	8	7	398.822	359	225.741	CBU_1354	hypothetical protein (NCBI)	2151	R	Predicted metal-sulfur cluster biosynthetic enzyme	GO:0032259,GO:0003676,GO:0008168
CBU_1355	222344	NP_820344.1	29654652	7195	1305829	1305476	-	1305617	1305666	Spotted	AAAATGACGTTTTGATGAAAACTGCGATAGGGTTATCCGTTGCCATTGAC	992	211	operon	10	10	0	0	4	0	0	7	0	88	40	19	10	7	353.739	229	242.236	CBU_1355	HesB/YadR/YfhF family protein (NCBI)	316	S	Uncharacterized conserved protein
CBU_1356	222345	NP_820345.1	29654653	7195	1306302	1305826	-	1305964	1306015	Spotted	CGAAATTTTATTTTCTCAATTTCACGATTTAGTGACAGGTACAAAACGGGAG	992	211	operon	10	10	0	2	0	0	0	5	0	93	62	21	10	8	401.237	363	232.997	CBU_1356	NifU family protein (NCBI)	822	C	NifU homolog involved in Fe-S cluster formation	GO:0016226,GO:0005506,GO:0005515,GO:0051536
CBU_1357	222346	NP_820346.1	29654654	7195	1307512	1306295	-	1306428	1306477	Spotted	ATTAGTACGATTTTAGATAATGAAGGCATTGCCATTCGAGCCGGACATCA	992	211	operon	10	9	0	4	3	0	2	4	0	164	104	38	10	7	366.329	314.5	203.292	csdB	selenocysteine lyase (NCBI)	520	E	Selenocysteine lyase	GO:0006534,GO:0031071,GO:0008483,GO:0009000,GO:0030170	4.4.1.16	Selenocysteine lyase.
CBU_1358	222347	NP_820347.1	29654655	7195	1308785	1307505	-	1307554	1307603	Spotted	GAGATGCTGCCCAATAAAGTAATCGCCGATCGAATTCAGCAATTAGTCAC	992	211	operon	10	10	0	4	4	2	0	4	1	86	42	16	8	7	348.395	245.5	232.875	CBU_1358	hypothetical protein (NCBI)	719	O	ABC-type transport system involved in Fe-S cluster assembly, permease component	GO:0016226,GO:0005515
CBU_1359	222348	NP_820348.1	29654656	7195	1309516	1308782	-	1308835	1308884	Spotted	TAAACCGGATTTTGTGCACGTATTGGTAAATGGCCGAATCGTATTATCGG	992	211	operon	10	10	0	4	4	1	0	5	0	125	73	16	8	7	331.752	281	197.46	CBU_1359	ABC transporter, ATP-binding protein (NCBI)	396	O	ABC-type transport system involved in Fe-S cluster assembly, ATPase component	GO:0006810,GO:0005524,GO:0016887
CBU_1360	222349	NP_820349.2	215919169	7195	1310994	1309540	-	1309936	1309987	Spotted	ACTTACCAATAATTTTCAACAAGCGGATACAGGGACGAAAATGATTCATATC	992	211	operon	10	10	0	4	4	2	0	5	1	130	88	20	7	7	357.631	312.5	195.592	sufB	FeS assembly protein SufB (RefSeq)	719	O	ABC-type transport system involved in Fe-S cluster assembly, permease component	GO:0016226,GO:0005515
CBU_1361	222350	NP_820350.1	29654658	7195	1311436	1310975	-	1311006	1311055	Spotted	GCCGATATGCAAAAGCCATTGTTGAAACGAATCAGTATTTGCAAATGCAG	992	211	operon	10	10	0	1	0	0	0	0	0	88	51	21	9	7	375.818	303	233.84	CBU_1361	rrF2 family protein (NCBI)	1959	K	Predicted transcriptional regulator
CBU_1362	222351	NP_820351.1	29654659	7195	1311644	1312780	+	1312645	1312695	Spotted	CCTTAATGGTAAATTACACGTTGAAATTTACTTGCCGTTAACTGCATTAGC	993	212	operon	10	10	0	0	0	0	0	0	0	118	71	20	1	0	332.415	290.5	158.985	CBU_1362	cation-efflux family protein (NCBI)	53	P	Predicted Co/Zn/Cd cation transporters	GO:0006812,GO:0016020,GO:0008324
CBU_1363	222352	NP_820352.1	29654660	7195	1312773	1314149	+	1314098	1314149	Spotted	GGAGCAGCTCCGATTACTCGATGAATTAGATCATTATTTAAGACTGTCTTAA	993	212	operon	10	9	0	0	0	1	0	2	0	79	36	14	1	0	302.975	238	164.529	CBU_1363	exodeoxyribonuclease I, putative (NCBI)	2925	L	Exonuclease I	GO:0005622,GO:0003676,GO:0004527,GO:0008852	3.1.11.1	Exodeoxyribonuclease I.
CBU_1364	222353			7195	1314215	1315712	+	1315009	1315058	Spotted	AAGCTATTGTACCGTCGATGAATTAATGACCTCTAACTACCCACAATTTG	994		-	10	10	1	0	0	0	0	0	0	15	15	3	1	0	464	423	151.69	CBU_1364	hypothetical protein (RefSeq)
CBU_1365					1315663	1315712		1315663	1315712	Spotted	CATCAAAAGATGCTAAACAGTGGTTGGAACACATCGAAAATGTCAATTAA	995		-	7	5	1	2	0	0	0	0	0	39	20	4	1	0	310.692	287	161.973
CBU_1366	222355	NP_820355.1	29654663	7195	1316078	1315746	-	1316015	1316064	Spotted	ATTGATCGTAGGCGGTTGTTTGTTGTTTCTGGAGTTATCAAGCAGTTTTG	996		-	2	2	0	0	0	0	0	0	0	3	3	1	0	0	449	483	79.643	CBU_1366	hypothetical protein (NCBI)
CBU_1367	222356			7195	1318071	1316260	-	1316392	1316443	Spotted	TCGGGATGAAGATAAAATAGAAGAAAGAGTAAATACGATTGTGGATCGCTAT	997		-	3	3	0	0	0	0	0	0	1	3	3	3	1	0	633.333	572	166.689	CBU_1367	hypothetical protein (RefSeq)				GO:0003677
CBU_1368					1317373	1317422		1317373	1317422	Spotted	GCTCCAACGCACCACGATTCAATTCCCAAGATATCACTAACACCTTATAG	998		-	3	3	0	0	0	0	0	0	1	3	3	2	1	0	635.333	601	172.088
CBU_1369	222358	NP_820358.1	29654666	7195	1318270	1319289	+	1319174	1319223	Spotted	ATAATCCTTTATTGACTCTCTTGCAAGTGAGAAGTGCATTGTGGCAGTCG	999		-	2	2	0	0	0	0	0	0	0	3	3	2	0	0	510.333	572	132.719	CBU_1369	hypothetical protein (NCBI)
CBU_1370	222359	NP_820359.1	29654667	7195	1320475	1319489	-	1319528	1319577	Spotted	TCTTTGTAAAGCCTACCAAGCACAACTTACCAATTGAAAAGGAGCCTTCC	1000		-	1	1	0	0	0	0	0	0	0	4	4	0	0	0	350.25	310.5	102.099	CBU_1370	hypothetical protein (NCBI)
CBU_1371	222360	NP_820360.1	29654668	7195	1321348	1320668	-	1320874	1320923	Spotted	TCAAGTGAGTAACCCTACTGACATTAACTGGCCGGATAAAGATTGGTTGG	1001		-	10	1	0	0	1	0	0	1	1	156	94	18	3	1	329.75	298	151.176	CBU_1371	protease, putative (NCBI)	1214	O	Inactive homolog of metal-dependent proteases, putative molecular chaperone	GO:0006508,GO:0008450
CBU_1372	222361	NP_820361.1	29654669	7195	1322073	1321492	-	1321547	1321596	Spotted	TATAACCCTCTCTGGAAACGAGGTTTTACTTATCGAGGGCTTTCGAGTTC	1002		-	3	3	0	0	0	0	0	0	0	4	4	3	0	0	546.5	597	148.066	CBU_1372	hypothetical protein (NCBI)
CBU_1373	222362	NP_820362.1	29654670	7195	1322174	1323466	+	1323378	1323429	Spotted	GCATTGTTGCTGATTCTGAACTGGAAAGTGAATATCAAGAGTCTCAATTAAA	1003	213	operon	10	10	2	6	1	2	2	6	0	132	61	16	6	2	307.47	233.5	182.097	pabB	para-aminobenzoate synthase, component I (NCBI)	147	EH	Anthranilate/para-aminobenzoate synthases component I	GO:0009396,GO:0016833,GO:0046820	2.6.1.85,6.3.5.8,4.1.3.-	Aminodeoxychorismate synthase.,Transferred entry: 2.6.1.85.,
CBU_1374	222363	NP_820363.1	29654671	7195	1323463	1323942	+	1323826	1323875	Spotted	GAACAAATACGCAAACCTCTATCCCAACGCGATTTAGTTATGGTGCAGTG	1003	213	operon	10	5	0	0	0	0	10	0	0	55	28	12	11	5	383.382	256	280.906	CBU_1374	cytidine/deoxycytidylate deaminase family protein (NCBI)	590	FJ	Cytosine/adenosine deaminases	GO:0004132,GO:0008270,GO:0016787	3.5.4.12	dCMP deaminase.
CBU_1375	222364	NP_820364.1	29654672	7195	1326119	1323975	-	1324060	1324109	Spotted	AGCCGGGTGGATAAACTCGAAAACCGATATTACATTCATCTCACCATTGA	1004		-	10	5	0	2	0	0	9	4	1	127	58	12	9	6	310.016	243	194.103	relA	GTP pyrophosphokinase (NCBI)	317	TK	Guanosine polyphosphate pyrophosphohydrolases/synthetases	GO:0015969,GO:0008728,GO:0016597	2.7.6.5	GTP diphosphokinase.
CBU_1376	222365	NP_820365.1	29654673	7195	1326197	1327561	+	1327497	1327546	Spotted	TTCTTATCTTCCTGATGGTCCAAGCGACTATTAATGATTTGGTGCGTCTA	1005		-	10	10	0	0	6	0	0	0	0	176	108	29	13	1	347.58	288.5	188.051	CBU_1376	membrane-associated zinc metalloprotease, putative (NCBI)	750	M	Predicted membrane-associated Zn-dependent proteases 1	GO:0006508,GO:0016021,GO:0004222,GO:0005515,GO:0008270	3.4.24.-
CBU_1376a	5437880	YP_002333000.1	215919170	7195	1327775	1327810	+					1006		-	0	0	0	0	0	0	0	0	0									CBU_1376a	hypothetical protein (RefSeq)
CBU_1377					1328145	1328194		1328145	1328194	Spotted	TATTCAGAATTAAAATCGACGCTGCAATTACGACGCGTGCATTCTCAACG	1007		-	1	1	0	0	0	0	0	0	0	1	1	1	0	0	668	668	#DIV/0!
CBU_1378	222367	NP_820367.1	29654675	7195	1328863	1328979	+	1328867	1328898	Spotted	AATTTGATCAGCGCACTCTCGACGAAGGGAAA	1008		-	1	1	0	0	0	0	0	0	0	1	1	1	0	0	668	668	#DIV/0!	CBU_1378	hypothetical protein (NCBI)
CBU_1379	222368			7195	1330099	1328069	-	1329112	1329163	Spotted	AAAGAATTAAAGAAAGTATATTCGCCTGTTATGGAGCGCAATGACTATAGTC	1009		-	0	0	0	0	0	0	0	0	0	15	3	0	0	0	207.733	206	59.4144	CBU_1379	protein kinase, putative (RefSeq)				GO:0006468,GO:0004674,GO:0005524
CBU_1379a	5437881	YP_002333001.1	215919171	7195	1330216	1331064	+					1010		-	0	0	0	0	0	0	0	0	0									CBU_1379a	hypothetical protein (RefSeq)
CBU_1380	222369	NP_820369.1	29654677	7195	1331945	1331100	-	1331202	1331251	Spotted	AATACCCTGTTATGTGGGCGGTACTATTATTGAGTTTCTGCGTTCTAGGC	1011		-	3	3	0	0	0	0	0	0	0	30	10	3	0	0	250.067	192.5	116.995	CBU_1380	DoxD family protein, putative (NCBI)	2259	S	Predicted membrane protein
CBU_1381	222370	NP_820370.1	29654678	7195	1332941	1332123	-	1332293	1332342	Spotted	TTTGCCTTTCTCTCAATTATCTTTGGTAATCTTGCTTGCGTTGATTACAG	1012	214	operon	10	10	0	1	0	0	2	2	0	235	149	50	14	7	367.255	309	194.195	cdsA	phosphatidate cytidylyltransferase (NCBI)	575	I	CDP-diglyceride synthetase	GO:0008654,GO:0016020,GO:0004605	2.7.7.41	Phosphatidate cytidylyltransferase.
CBU_1382	222371	NP_820371.1	29654679	7195	1333644	1332931	-	1332969	1333018	Spotted	TAATGAAGAAACTTTTGATCAAGCCTTGGCGTTTTACCGTACCCGTCAAC	1012	214	operon	10	10	0	1	3	1	1	1	0	296	190	71	15	7	380.209	331.5	196.962	uppS	undecaprenyl diphosphate synthase (NCBI)	20	I	Undecaprenyl pyrophosphate synthase	GO:0008152,GO:0008834	2.5.1.31	Di-trans,poly-cis-decaprenylcistransferase.
CBU_1383	222372	NP_820372.1	29654680	7195	1334198	1333641	-	1333746	1333797	Spotted	AGCCAATAACGATTTAAAGGAATTAATGAAGGAAAAGGAGATCAGTGAAGAT	1012	214	operon	10	10	0	1	4	6	0	5	0	290	211	113	33	7	444.869	405.5	226.092	frr	ribosome recycling factor (NCBI)	233	J	Ribosome recycling factor	GO:0006412
CBU_1384	222373	NP_820373.1	29654681	7195	1335007	1334276	-	1334511	1334553	Spotted	GGGGTATTGAGATCAATGCAGATGTCGTTTTGAAAGCCACCAA	1012	214	operon	10	6	0	0	4	2	5	4	0	338	218	76	17	8	367.769	310.5	190.695	pyrH	uridylate kinase (NCBI)	528	F	Uridylate kinase	GO:0006221,GO:0008652,GO:0009041	2.7.4.22	UMP kinase.
CBU_1385	222374	NP_820374.1	29654682	7195	1335897	1335007	-	1335007	1335056	Spotted	CGCAAAATTTTGCTGATGAGGTAATGGCGCAAGTACAAGGAAATCGTTAA	1012	214	operon	10	8	0	0	6	4	0	7	0	302	212	76	15	6	390.536	352	189.799	tsf	elongation factor Ts (NCBI)	264	J	Translation elongation factor Ts	GO:0006414,GO:0005622,GO:0003746
CBU_1386	222375	NP_820375.2	215919172	7195	1336986	1335907	-	1335952	1336001	Spotted	CCGCTGAAACGAAAGAAACTTCTGAAGAGCCTAAGACTAAAGAAGTGCAG	1012	214	operon	10	10	0	0	10	9	0	5	0	320	219	102	39	18	422.959	365	233.31	rpsB	SSU ribosomal protein S2P (RefSeq)	52	J	Ribosomal protein S2	GO:0006412,GO:0015935,GO:0003735
CBU_1387	222376	NP_820376.1	29654684	7195	1337068	1337718	+	1337641	1337690	Spotted	GAGTCTTCAGATGAAGATCCCTTTCTGAGGAGATTGACACCTCGTATGAC	1013		-	7	7	0	0	0	0	0	0	0	8	8	4	0	0	485.5	494	110.671	CBU_1387	hypothetical protein (NCBI)
CBU_1388	222377	NP_820377.2	215919173	7195	1337773	1338585	+	1338450	1338499	Spotted	GAAATTACTTAATGATGATTGGACAGTAGTTACCAAAGATCGTCGCCTCT	1014		-	10	10	0	0	0	5	0	0	0	243	161	78	31	0	411.144	357	217.538	map	methionine aminopeptidase (RefSeq)	24	J	Methionine aminopeptidase	GO:0006508,GO:0004239	3.4.11.18	Methionyl aminopeptidase.
CBU_1388d	5437882	YP_002333002.1	215919174	7195	1341974	1341810	-					1015		-	0	0	0	0	0	0	0	0	0									CBU_1388d	hypothetical protein (RefSeq)
[truncated: 831 more rows]
