# Supplementary material for: Coxiella burnetii Transcriptional Analysis Reveals Serendipity Clusters of Regulation in Intracellular Bacteria
Source: PLoS One. 2010 Dec 21;5(12):e15321. doi: 10.1371/journal.pone.0015321 (PMC3006202; doi:10.1371/journal.pone.0015321)
Supplement: Table S5 — Statistical analysis of functional categories within clusters. (XLS) [file pone.0015321.s010.xls]

## Sheet: Feuil1
COG categories	Genome	Spotted genes	Regulated genes	Genes within cluster	Regulated genes within cluster
A: RNA processing and modification	0.08	0.08	0	0	0
B: Chromatin structure and dynamics	0	0	0	0	0
C: Energy production and conversion	6.48	6.57	3.42	6.25	3.23
D: Cell cycle control, cell division, chromosome partitioning	1.62	1.66	2.56	2.5	1.61
E: Amino acid transport and metabolism	7.13	7.24	7.69	10	8.06
F: Nucleotide transport and metabolism	3.73	3.83	5.98	5	4.84
G: Carbohydrate transport and metabolism	5.43	5.57	3.42	2.5	3.23
H: Coenzyme transport and metabolism	6.73	6.91	6.84	7.5	6.45
I: Lipid transport and metabolism	4.46	4.58	5.98	3.75	4.84
J: Translation, ribosomal structure and biogenesis	11.1	11.23	6.84	3.75	4.84
K: Transcription	3.57	3.66	3.42	3.75	4.84
L: Replication, recombination and repair	8.02	6.16	3.42	3.75	3.23
M: Cell wall/membrane/envelope biogenesis	8.75	8.99	18.8	16.25	16.13
N: Cell motility	0.57	0.58	0	0	0
O: Posttranslational modification, protein turnover, chaperones	4.46	4.58	3.42	5	4.84
P: Inorganic ion transport and metabolism	3.57	3.66	4.27	6.25	8.06
Q: Secondary metabolites biosynthesis, transport and catabolism	1.54	1.58	2.56	3.75	3.23
R: General function prediction only	9.89	10.07	10.26	12.5	12.9
S: Function unknown	6.81	6.82	4.27	3.75	4.84
T: Signal transduction mechanisms	2.27	2.33	1.71	1.25	1.61
U: Intracellular trafficking, secretion, and vesicular transport	2.43	2.5	2.56	1.25	1.61
V: Defense mechanisms	1.3	1.33	2.56	1.25	1.61
W: Extracellular structures	0	0	0	0	0
Z: Cytoskeleton	0.08	0.08	0	0	0
Khi2 Vs Genome		1	0.27	0.19	0.19
Khi2 Vs genes spotted			0.391	0.28	0.3
