# Supplementary material for: Coxiella burnetii Transcriptional Analysis Reveals Serendipity Clusters of Regulation in Intracellular Bacteria
Source: PLoS One. 2010 Dec 21;5(12):e15321. doi: 10.1371/journal.pone.0015321 (PMC3006202; doi:10.1371/journal.pone.0015321)
Supplement: Table S8 — Promoter -10 to start site analysis. (XLS) [file pone.0015321.s013.xls]

## Sheet: spacer_GCpercent
Name left	Length	%GC spacer
CBU_1974	32	17.71
CBU_1267a	31	45.1633
CBU_1045a	38	23.6833
CBU_0306	40	29.1667
CBU_1788a	30	38.89
CBU_1378	39	31.6233
CBU_1515	73	33.7933
CBU_1018	119	26.89
CBU_2085	99	33.33
CBU_0168	93	31.9
CBU_0411	32	30.21
CBU_0182	158	31.2233
CBU_1684	31	18.28
CBU_1615	406	32.5933
CBU_1514	167	39.72
CBU_0813	153	31.3733
CBU_0446	237	35.3033
CBU_0900	55	24.85
CBU_0380	42	26.19
CBU_1022	100	31.3333
CBU_0689	349	36.1967
CBU_0684	473	31.36
CBU_1614	140	30.0033
CBU_0166	255	31.11
CBU_0505a	37	26.1233
CBU_0439	45	31.85
CBU_1014	65	32.31
CBU_0562	427	31.77
CBU_1145	36	34.26
CBU_1613	52	30.77
CBU_0918	590	32.0333
CBU_0948	152	33.5533
CBU_1224a	66	42.4267
CBU_0981	31	27.9567
CBU_1236	31	33.3333
CBU_0683	421	34.1267
CBU_0799	42	34.1267
CBU_1312	38	30.7033
CBU_1005	235	33.9
CBU_0157	34	30.39
CBU_1686	774	33.55
CBU_1154	258	38.76
CBU_1017	381	36.1333
CBU_2097	41	41.4633
CBU_1318	208	35.2533
CBU_0838	367	35.7867
CBU_0842	366	35.1567
CBU_1422a	48	32.64
CBU_0456	118	47.1733
CBU_1685	474	30.5933
CBU_0833	602	32.5033
CBU_1775	308	34.0533
CBU_0323	84	30.16
CBU_0673	182	35.8967
CBU_0945	324	33.23
CBU_0699	520	32.6267
CBU_0034	87	35.25
CBU_0707a	134	33.83
CBU_0834	329	35.1567
CBU_1984	125	39.2
CBU_0560a	164	34.96
CBU_1710	146	31.05
CBU_1335	383	34.03
CBU_1427a	39	27.3533
CBU_0207	102	33.9867
CBU_0704	259	35.7767
CBU_2041	112	36.6067
CBU_1313	42	31.7467
CBU_0381	188	38.83
CBU_0409	52	32.6933
CBU_0899	150	38.8233
CBU_0665	329	35.2567
CBU_0837	495	30.64
CBU_0184	387	32.3
CBU_1379	677	35.45
CBU_2095a	38	30.7033
CBU_0836	359	36.0267
CBU_1542	110	44.5433
CBU_1890	103	30.1
CBU_1314a	48	38.1967
CBU_2027	96	35.4167
CBU_0695	459	32.46
CBU_1895	89	38.2033
CBU_1818	482	37.0667
CBU_0167	188	38.3
CBU_0961	58	37.93
CBU_0690	286	36.0133
CBU_0687	548	34.1867
CBU_1460	262	36.5133
CBU_0407	34	26.47
CBU_1679	468	35.3267
CBU_0767	44	39.3967
CBU_0880	462	33.91
CBU_1308	222	35.5867
CBU_1516	84	33.7267
CBU_0843	386	34.11
CBU_1692	57	32.1633
CBU_0841	378	38.9733
CBU_1712	97	33.3333
CBU_0885	389	37.1033
CBU_0870	83	35.34
CBU_0691	413	38.2567
CBU_1883	185	36.7567
CBU_1908	33	36.36
CBU_0957	415	34.9367
CBU_1833	46	39.13
CBU_1063	469	35.11
CBU_1012	731	32.6167
CBU_0402	36	29.6333
CBU_0915	170	35.4933
CBU_1370	329	34.65
CBU_1023	319	40.3333
CBU_0935	130	38.2033
CBU_1137	185	36.9367
CBU_1431	120	38.33
CBU_0839	431	37.9733
CBU_1823	350	35.05
CBU_1540	110	37.8767
CBU_0688	333	38.64
CBU_1178	378	37.2133
CBU_0669	58	30.4567
CBU_0676	338	38.1667
CBU_1877	428	34.11
CBU_1107	1052	35.6467
CBU_1111	405	38.4333
CBU_1121	61	33.8833
CBU_1308a	183	37.8867
CBU_2016	199	37.5233
CBU_0161	418	37.0633
CBU_0634	631	37.2433
CBU_0240	96	41.6633
CBU_1168	545	36.7967
CBU_0068	80	35.8333
CBU_0787	515	38.7033
CBU_0474	83	39.76
CBU_1985	233	38.4833
CBU_0954	249	40.0267
CBU_0881a	236	37.8533
CBU_1651	153	42.7
CBU_1799a	153	38.1267
CBU_1095	188	37.7633
CBU_1082	312	39.9567
CBU_0011	35	23.81
CBU_1310	35	35.24
CBU_1028	301	36.21
CBU_1123	342	43.86
CBU_1136	1045	37.7667
CBU_1607	133	37.0933
CBU_0829	332	41.87
CBU_1028a	474	36.71
CBU_0719	142	35.9133
CBU_1006	385	40.0867
CBU_1173	123	39.8367
CBU_0949	123	34.69
CBU_0471	495	39.78
CBU_0015	239	38.0733
CBU_2078	349	40.21
CBU_0645	88	37.5033
CBU_2007	396	35.7767
CBU_0644	113	34.22
CBU_0637	254	36.09
CBU_1011	395	36.2867
CBU_0516a	119	40.6167
CBU_0703	288	35.4167
CBU_0331	341	40.76
CBU_0881	222	34.6833
CBU_1085	406	40.4767
CBU_0169	415	29.1033
CBU_1004	249	35.2067
CBU_1580	366	36.7933
CBU_1707	31	40.86
CBU_1459	127	39.1067
CBU_0196	71	43.66
CBU_0831	633	37.9167
CBU_0871	152	36.1133
CBU_0672	539	38.28
CBU_0794	465	36.63
CBU_2096	123	35.77
CBU_0914	372	38.89
CBU_1263	129	44.7033
CBU_1820	175	40.76
CBU_0077	264	38.89
CBU_0685	1113	38.2133
CBU_2061	46	32.61
CBU_0715	331	39.1733
CBU_1086	331	39.1733
CBU_1104	331	39.1733
CBU_0724	331	39.1733
CBU_1544	331	39.1733
CBU_1458a	49	33.3333
CBU_0643	355	40.5667
CBU_0042	355	38.5933
CBU_0021	810	36.01
CBU_1098	275	35.6367
CBU_1388d	55	43.0333
CBU_0138	244	38.6633
CBU_1311	814	36.61
CBU_0577	259	36.4233
CBU_0051	195	35.5567
CBU_1530	646	41.3833
CBU_2062	463	37.87
CBU_0817	201	33.0033
CBU_1889	144	35.7233
CBU_0543	952	37.43
CBU_2028	249	42.0333
CBU_0628	176	40.34
CBU_0418	282	36.88
CBU_2076	106	41.1967
CBU_0484	224	36.7567
CBU_0625	136	39.2133
CBU_1349	580	36.09
CBU_1021	148	38.0633
CBU_2091	229	40.0267
CBU_0636	298	37.9167
CBU_0844	340	39.3167
CBU_1508	544	40.2567
CBU_0788	1613	39.7367
CBU_0514	264	36.6167
CBU_0878	322	40.7633
CBU_1036	90	38.8867
CBU_1987a	45	34.8133
CBU_0316a	51	46.4033
CBU_0563	72	37.4967
CBU_0806	36	41.6667
CBU_1128	120	39.7233
CBU_1801	99	37.0333
CBU_1802	213	34.74
CBU_1757	852	40.5633
CBU_1790	635	34.7
CBU_0603	371	34.77
CBU_0762	209	40.8267
CBU_0801	146	39.04
CBU_1395	149	33.3333
CBU_1805	128	36.4567
CBU_2081	393	40.6267
CBU_1479	131	39.6967
CBU_0388	1393	36.95
CBU_1855	116	35.92
CBU_1160	392	34.3533
CBU_1949	383	40.0333
CBU_0367	249	37.4833
CBU_0857	326	41.1033
CBU_1606	80	42.0833
CBU_0696	385	40.35
CBU_0018	148	34.2333
CBU_1575	148	38.51
CBU_1219	373	36.9067
CBU_1298	593	37.4767
CBU_1135	145	43.9067
CBU_0700	586	40.6133
CBU_0545	216	35.1867
CBU_0007	71	30.9833
CBU_1060	210	42.38
CBU_0435	198	40.74
CBU_0976	257	40.08
CBU_2083	245	40.9533
CBU_1355	118	37.57
CBU_1691	109	42.5067
CBU_1495	790	39.1467
CBU_0502	256	41.1433
CBU_1800	253	34.3867
CBU_1451	523	38.1733
CBU_0327	1040	36.1333
CBU_0858	543	41.2533
CBU_1485	226	37.7567
CBU_1394	176	44.6967
CBU_0121	44	30.3033
CBU_0732	309	33.4767
CBU_1960	261	42.0167
CBU_1253	732	38.0233
CBU_0793	205	40.6533
CBU_0827	199	40.37
CBU_0706	237	35.8667
CBU_1426	38	37.7167
CBU_1953	190	43.3333
CBU_0832	184	40.3967
CBU_0326	438	43.9867
CBU_0339	254	38.06
CBU_1027	464	41.74
CBU_1058	429	39.4733
CBU_1284	437	39.13
CBU_1231	233	39.0567
CBU_0770	422	37.9933
CBU_0619	163	41.5167
CBU_0259	32	35.42
CBU_1752	413	37.9333
CBU_2082	256	40.8867
CBU_1612	32	29.1667
CBU_0682	218	42.5067
CBU_0760	125	35.4667
CBU_0010	273	42.6133
CBU_0022	270	38.0233
CBU_1934	816	38.5233
CBU_0508	238	38.6533
CBU_1491	113	35.69
CBU_0826	168	42.46
CBU_1083	576	42.8233
CBU_0534	399	37.01
CBU_0626	696	37.4533
CBU_1576	840	40
CBU_0302	98	46.9367
CBU_0437	197	37.6767
CBU_0128	439	37.1833
CBU_0137	317	43.0067
CBU_0410	579	39.2633
CBU_1481	118	42.0933
CBU_0262	207	42.9933
CBU_1992	92	36.5933
CBU_0781	339	39.3333
CBU_1101	294	35.1167
CBU_1209	514	39.1667
CBU_0716	307	40.5
CBU_0652	281	43.6533
CBU_0959	410	37.4
CBU_1317	43	38.76
CBU_0008	63	38.6233
CBU_1711	63	33.8633
CBU_1604	753	38.1167
CBU_1701	469	43.4267
CBU_0220	40	32.5
CBU_1831a	40	31.6667
CBU_1393	1477	38.9733
CBU_2070	137	38.69
CBU_1930a	97	40.55
CBU_0478a	57	38.01
CBU_0176	396	40.2333
CBU_0819	225	40
CBU_1405	94	35.8167
CBU_1181	393	39.1
CBU_0185	351	32.9867
CBU_0193	404	36.0567
CBU_0183	91	39.1933
CBU_1015	182	36.81
CBU_0110	162	37.6533
CBU_0113	71	42.7233
CBU_0420	586	40.4267
CBU_0739	423	41.29
CBU_2052	301	38.2067
CBU_0930	227	39.2067
CBU_1964	278	42.3267
CBU_0944	34	35.29
CBU_1656	34	34.31
CBU_1287	593	39.0533
CBU_1827	382	41.71
CBU_1164	567	38.8433
CBU_1872	232	39.51
CBU_1286	461	40.06
CBU_1150	230	38.6567
CBU_1847a	473	40.8567
CBU_2074	308	44.0467
CBU_1569	548	37.9567
CBU_1007	322	41.0967
CBU_0159	370	40.7233
CBU_1806	96	36.46
CBU_0681	302	42.9367
CBU_0373	175	40
CBU_1295	110	37.2733
CBU_1976	220	40.9067
CBU_0384b	62	45.6967
CBU_1852	465	37.3467
CBU_0158	186	39.4267
CBU_1073	169	39.4467
CBU_1915	431	39.1333
CBU_0119	459	39.36
CBU_0436	259	37.0633
CBU_0612	166	39.1567
CBU_0677	346	43.5467
CBU_0786	391	42.1167
CBU_0624	45	35.5567
CBU_0835	90	37.04
CBU_0846	450	41.1133
CBU_1892	180	40.7433
CBU_2079	135	41.4833
CBU_0311	253	43.8733
CBU_0985	253	36.7567
CBU_0596	250	39.2
CBU_0701	278	38.6067
CBU_0614	146	38.8133
CBU_0476	581	41.25
CBU_0510	101	37.62
CBU_1914	693	41.0767
CBU_1583	101	38.61
CBU_0404	463	38.47
CBU_1560	42	38.0933
CBU_1819	378	37.6533
CBU_0422	112	37.7933
CBU_1799	154	37.23
CBU_0513	383	44.3867
CBU_1857	531	40.99
CBU_1838	190	39.8267
CBU_0830	385	43.81
CBU_1409	279	38.47
CBU_0678	527	41.6167
CBU_1369	340	40.1933
CBU_0319	39	30.77
CBU_0342	39	35.9
CBU_0877	39	31.6233
CBU_0978	156	42.7367
CBU_0765	555	40.41
CBU_0295	490	38.71
CBU_0541	231	43.1433
CBU_1863	604	42.11
CBU_0547	562	39.9733
CBU_0952	228	38.7433
CBU_0752	314	36.3067
CBU_1634a	50	38
CBU_0334	480	41.46
CBU_0898	111	38.44
CBU_0372	455	40.2167
CBU_0928	197	43.3167
CBU_2077	269	41.2667
CBU_0250	183	42.6233
CBU_0375	241	40.5267
CBU_0828	518	42.2133
CBU_1332a	36	39.8167
CBU_1764	36	36.1133
CBU_0931	501	41.3167
CBU_1734	238	40.7533
CBU_2065	213	40.3767
CBU_0462	437	42.03
CBU_0617	506	38.4733
CBU_1420	293	39.1367
CBU_1676	362	38.49
CBU_1003	243	39.3667
CBU_1806a	116	43.39
CBU_0635	497	42.3233
CBU_1140	371	40.5
CBU_1065	185	41.8033
CBU_1996	185	43.6067
CBU_0727	378	41.5333
CBU_0400	160	43.75
CBU_0977	662	40.7833
CBU_1374	160	38.33
CBU_1155	601	42.65
CBU_0266	430	36.5867
CBU_0782	463	37.51
CBU_0792	463	38.66
CBU_1506	146	39.9533
CBU_0556	223	41.7
CBU_1194	479	36.6767
CBU_0086	253	42.2933
CBU_0440	66	40.4033
CBU_0840	638	41.2733
CBU_1742	121	38.29
CBU_1340	99	40.74
CBU_1828	418	42.82
CBU_2090	275	42.7867
CBU_1204	459	44.3
CBU_1363	459	41.3933
CBU_2009	445	37.5267
CBU_1585	500	37.8667
CBU_0697	387	40.05
CBU_1704	225	43.11
CBU_1297	557	40.5167
CBU_0496	85	42.35
CBU_1804	85	37.6467
CBU_1400	244	42.0767
CBU_1543	189	39.5067
CBU_1835	460	42.1733
CBU_0085	52	39.7433
CBU_1675a	52	46.7933
CBU_1041	52	33.9767
CBU_0165	197	37.9033
CBU_1512	238	37.5333
CBU_1208	413	39.71
CBU_1851	599	37.6733
CBU_0289	82	39.0267
CBU_1279a	41	47.1567
CBU_0876	369	41.9167
CBU_1888	265	41.3833
CBU_0567	153	40.3033
CBU_0492	344	42.1533
CBU_1794	273	39.5633
CBU_0642	251	43.16
CBU_0668	60	36.67
CBU_1722	600	39.6133
CBU_0675	248	42.7433
CBU_0768	512	39.52
CBU_0916	256	41.2767
CBU_2014	128	38.54
CBU_0772	373	42.8967
CBU_1724	748	38.59
CBU_0592	106	31.1333
CBU_1452	1495	39.9033
CBU_0671	478	41.0733
CBU_0423	258	39.5333
CBU_1406	278	37.8133
CBU_1306	285	43.5067
CBU_1464	95	45.6133
CBU_0062	502	38.1133
CBU_0449	332	43.0567
CBU_0923	377	36.9567
CBU_1221	198	43.0967
CBU_0378	141	42.08
CBU_1380	282	39.0067
CBU_0986	271	44.7733
CBU_0029	233	40.63
CBU_1858	466	40.63
CBU_0578	325	40.5133
CBU_1213	658	39.5633
CBU_0989	1057	35.05
CBU_1941	157	42.25
CBU_1148	1158	42.5733
CBU_0860	154	37.8767
CBU_1850	162	37.86
CBU_0971	348	41.7633
CBU_1584	116	38.22
CBU_0187	384	31.37
CBU_0956	221	36.95
CBU_1928	937	41.98
CBU_1359	245	41.2233
CBU_1577	315	42.2233
CBU_1617	35	30.4733
CBU_0573	716	43.7133
CBU_1078	113	38.35
CBU_1081	113	38.6433
CBU_1847b	121	39.3933
CBU_1032	293	38.1133
CBU_1813	43	41.0833
CBU_0970	352	41.29
CBU_1457	677	40.57
CBU_1936	266	43.2333
CBU_0016	274	44.2833
CBU_0211	420	42.6033
CBU_0824	462	41.0533
CBU_1677	145	37.47
CBU_1016	51	36.6
CBU_1138a	51	37.9067
CBU_0789	832	40.7867
CBU_0869	365	40.9133
CBU_0133	500	36.1567
CBU_0425	456	40.2767
CBU_0254	118	47.46
CBU_0968	177	38.0433
CBU_1965	362	44.3833
CBU_0049	437	39.6633
CBU_1279	201	36.32
CBU_0050	201	40.63
CBU_1783	335	41.79
CBU_0571	142	38.0267
CBU_1375	715	41.8167
CBU_0389	91	45.7867
CBU_1547	265	41.51
CBU_0950	1081	42.4267
CBU_1124	107	40.81
CBU_1478	206	39.97
CBU_1698	420	41.1133
CBU_1697	219	41.4
CBU_1837	347	41.3033
CBU_1146	990	39.5267
CBU_1069	691	38.2033
CBU_0465	32	36.4567
CBU_1152a	457	37.5933
CBU_2084	40	36.6667
CBU_0036	160	40
CBU_0457	40	40
CBU_1134	152	44.9567
CBU_1501	232	40.5167
CBU_1937	393	37.3767
CBU_2004	352	42.0433
CBU_0939	509	38.3767
CBU_1341	525	42.6667
CBU_0531	237	43.5967
CBU_0686	237	44.16
CBU_0419	277	38.51
CBU_0674	197	42.3
CBU_0304	149	41.1633
CBU_0562a	141	41.37
CBU_0309	657	40.1833
CBU_0379	258	41.0867
CBU_0998	436	43.6533
CBU_0980	93	47.31
CBU_1991	85	40.3933
CBU_1416	239	42.82
CBU_1930	61	36.61
CBU_0775	114	39.1833
CBU_1867	53	44.6533
CBU_1190	212	38.9933
CBU_0720	294	44.1067
CBU_1292	466	40.4867
CBU_0883	45	37.78
CBU_1216a	45	34.8133
CBU_1480	217	40.4
CBU_1847	82	39.43
CBU_1379a	283	42.52
CBU_1493	558	40.0833
CBU_0542	674	43.67
CBU_0811	526	42.5833
CBU_0805	37	42.3433
CBU_0218a	388	39.69
CBU_0261	124	49.19
CBU_0532	124	39.7833
CBU_0092	306	41.6133
CBU_0131	443	42.5133
CBU_0820	444	38.6167
CBU_0802	269	42.13
CBU_1652	377	40.67
CBU_1910	253	42.6867
CBU_0525	361	42.1067
CBU_1836	419	43.8367
CBU_0249	108	40.1233
CBU_0769	229	39.5933
CBU_1906	50	42
CBU_1956	100	41
CBU_0873	200	44.3333
CBU_1853	150	37.78
CBU_1678	171	38.9867
CBU_1448	121	41.05
CBU_0155	518	42.02
CBU_1206	460	39.6367
CBU_0252	134	42.29
CBU_2039	704	39.9633
CBU_0333	260	45.3867
CBU_1189	428	45.7167
CBU_0059	42	41.27
CBU_1916	147	42.63
CBU_0288	160	43.33
CBU_0500	320	41.7667
CBU_0875	341	45.2567
CBU_1860	745	41.6567
CBU_0529	97	36.08
CBU_1618	118	37.8567
CBU_2088	451	40.65
CBU_0177	527	40.9867
CBU_1314	215	44.8067
CBU_1839	409	40.5033
CBU_0482	270	41.73
CBU_1008	443	41.46
CBU_1786	401	40.5633
CBU_0284	76	40.35
CBU_0964	304	39.8033
CBU_1220	241	39.8333
CBU_1226	1627	42.51
CBU_0591	275	41.4533
CBU_0088	272	42.0367
CBU_2000	766	43.1233
CBU_1977	366	41.1667
CBU_0509	115	40.29
CBU_1113	406	39.9333
CBU_1373	431	41.9167
CBU_1665	580	39.6567
CBU_0483	222	41.7433
CBU_0946	329	40.3267
CBU_1761	658	40.4267
CBU_0260	120	48.8867
CBU_0132	373	40.3933
CBU_0907	193	42.8333
CBU_0605	391	37.9367
CBU_1120	542	43.85
CBU_1721	237	38.68
CBU_0041	711	39.9467
CBU_0766	651	41.78
CBU_0263	328	44
CBU_1061	276	43.3567
CBU_2086	419	42.3233
CBU_0473	130	42.3067
CBU_0758	273	44.2
CBU_1234	429	37.9933
CBU_1328	91	43.2233
CBU_2075	234	39.03
CBU_0215	533	40.96
CBU_1337	1144	43.56
CBU_0650	409	38.37
CBU_1603	343	42.9533
CBU_1729	317	45.32
CBU_2047	291	42.84
CBU_0076	413	42.8567
CBU_0453	187	45.2733
CBU_0344a	400	42.3333
CBU_0003	358	43.11
CBU_0397	166	37.1467
CBU_0741	441	42.2533
CBU_0579	498	41.03
CBU_1465	153	40.52
CBU_0479	254	45.4067
CBU_0616	197	38.41
CBU_0568	324	42.9
CBU_1343	495	42.0867
CBU_1158	456	39.9867
CBU_1466	114	42.1067
CBU_1919	57	45.03
CBU_2040	443	43.1133
CBU_0349	228	45.1767
CBU_0783	330	37.75
CBU_1322	329	41.8433
CBU_1346	461	44.0367
CBU_0208	291	36.7
CBU_1663	44	38.6367
CBU_0239	207	46.0567
CBU_1115	106	36.7933
CBU_1559a	31	34.4067
CBU_1942	186	38.1733
CBU_0859	124	45.9667
CBU_0368	395	43.3733
CBU_1468	1154	42.3133
CBU_1404	111	45.0467
CBU_0582	80	44.5833
CBU_0463a	129	40.57
CBU_1105	406	35.42
CBU_1638	402	37.5633
CBU_1739	286	43.59
CBU_1238	85	39.9967
CBU_1954	291	41.1233
CBU_0017	242	43.5267
CBU_1307	139	43.1633
CBU_0963	175	40.9533
CBU_1859	337	39.96
CBU_0320	1003	40.7433
CBU_0098a	54	46.2967
CBU_1601	162	39.92
CBU_0066	198	39.8967
CBU_0296	216	42.13
CBU_1673	90	36.6667
CBU_1687	767	39.7133
CBU_0009	478	42.5367
CBU_1398	406	42.2833
CBU_1738	113	43.6567
CBU_1415	339	43.66
CBU_0506	575	44.8133
CBU_0540	1170	43.96
CBU_2093	195	42.5633
CBU_1277	236	42.37
CBU_0271	159	45.07
CBU_0583	100	41.6667
CBU_0152	200	42.1667
CBU_1152	464	43.1033
CBU_1588	769	40.57
CBU_0623	41	40.6467
CBU_0038	328	43.4933
CBU_0627	41	45.5267
CBU_1713	492	44.24
CBU_1008a	105	39.3633
CBU_1608	892	36.5
CBU_1593	87	43.6767
CBU_0694	371	39.62
CBU_0987	266	43.11
CBU_1562	849	37.4533
CBU_0069	722	43.25
CBU_0358	382	40.9067
CBU_1871	202	42.2433
CBU_0065a	115	40.87
CBU_0148	138	41.5433
CBU_0210	46	35.5067
CBU_0403	46	39.8533
CBU_1621	46	42.7533
CBU_1247	207	41.7067
CBU_1230	1111	42.3633
CBU_0549	383	40.9033
CBU_0745	97	38.49
CBU_1899	194	42.7867
CBU_1972	74	36.0367
CBU_0079	330	36.6033
CBU_1856	380	43.07
CBU_1293	209	45.93
CBU_0181	400	42.1667
CBU_1780	530	42.6433
CBU_1746	135	44.4467
CBU_1330	439	40.2733
CBU_0975	555	45.0467
CBU_1458	387	41.1733
CBU_0724a	352	38.6167
CBU_0344	179	43.55
CBU_1056	872	43.54
CBU_0398	183	41.7133
CBU_0680	437	43.5567
CBU_0472	602	43.19
CBU_1010	127	39.8933
CBU_0984	259	39.64
CBU_0972	231	41.99
CBU_1268	358	42.9267
CBU_1397	391	44.0767
CBU_2067	467	40.6867
CBU_1339	203	44.17
CBU_0661	137	43.0667
CBU_0305	705	44.2067
CBU_1444	175	40.57
CBU_1817	322	41.7167
CBU_1067a	583	37.9067
CBU_0447	185	44.6833
CBU_0089a	114	42.3967
CBU_0142	304	41.6667
CBU_1097	266	41.6033
CBU_1169	152	42.1033
CBU_0102	38	35.9633
CBU_0370	76	53.51
CBU_1084	684	40.8367
CBU_1316	76	37.28
CBU_1364	500	40.3167
CBU_0530	390	43.8467
CBU_0279	276	40.94
CBU_1329	357	42.2067
CBU_1382	238	42.8567
CBU_0087	648	40.4833
CBU_2018	205	40.9767
CBU_1879	210	40.4733
CBU_0324	549	41.8367
CBU_0933	258	37.4667
CBU_1810	392	43.7067
CBU_0100	134	36.07
CBU_1042	134	38.0567
CBU_0159a	220	42.2767
CBU_0198	579	43.5233
CBU_0692	354	43.7867
CBU_1129	397	45.8467
CBU_0281	182	44.5033
CBU_0999	455	45.5667
CBU_0822	379	41.7767
CBU_1952	533	43.1533
CBU_0702	250	42.9333
CBU_1968	101	39.93
CBU_0139	207	38.97
CBU_1768	154	41.3433
CBU_1099	260	41.0267
CBU_1356	159	43.8167
CBU_0191	328	37.3967
CBU_1182	381	43.48
CBU_0629	1047	44.03
CBU_1198	179	42.6433
CBU_1300	116	45.4033
CBU_1669	353	43.72
CBU_0216	427	37.4233
CBU_0679	315	41.5867
CBU_0039	678	41.99
CBU_0493	320	44.8967
CBU_1715	131	42.4933
CBU_0564	486	42.3867
CBU_1019	73	46.5767
CBU_1831	483	37.89
CBU_1980	322	40.4767
CBU_1821	166	44.1767
CBU_0515	440	42.1967
CBU_1703	352	44.6967
CBU_0580	274	42.2133
CBU_1119	274	44.4033
CBU_1196	754	43.68
CBU_0111	397	43.3267
CBU_0932	515	46.02
CBU_1958	216	36.2633
CBU_1728	206	40.13
CBU_0953	442	44.9467
CBU_1714	447	45.2633
CBU_1815	663	43.34
CBU_0490	595	41.7933
CBU_0754	349	42.5033
CBU_1151	246	41.4633
CBU_0901	1228	41.2833
CBU_0150	271	42.1867
CBU_0391	346	43.93
CBU_1357	406	43.1867
CBU_1904	218	41.1333
CBU_1222	298	42.95
CBU_1826	283	42.9933
CBU_0874	353	47.4033
CBU_1175	438	43.2267
CBU_1275	403	44.17
CBU_1176	473	40.3133
CBU_0518	673	43.5367
CBU_0958	1312	40.1033
CBU_0718	95	40
CBU_1257	135	41.73
CBU_1917	45	48.8867
CBU_1053	145	43.6767
CBU_1323	120	47.2233
CBU_1324	65	43.0767
CBU_1548	125	41.0667
CBU_1705	130	39.7467
CBU_2044	713	42.12
CBU_0897	507	45.0367
CBU_0894	417	43.4867
CBU_1716	392	47.0233
CBU_1387	217	42.09
CBU_0712	212	41.1967
CBU_1188	424	45.0433
CBU_0740	818	44.3367
CBU_1639	399	42.3533
CBU_0908	182	36.08
CBU_1002	324	40.6367
CBU_1127	172	43.8
CBU_1762	461	44.6133
CBU_0848	548	41.12
CBU_1217	498	46.3167
CBU_0919	382	41.4333
CBU_1719	117	45.87
CBU_0812	453	41.3533
CBU_0524	851	45.1633
CBU_2080	321	44.03
CBU_1787	612	44.4467
CBU_1962	704	41.8567
CBU_1044	583	37.1333
CBU_2037	582	41.2967
CBU_0631	1325	45.26
CBU_1507	743	45.2667
CBU_1782	405	43.7867
CBU_0047	314	45.1067
CBU_1087	149	40.27
CBU_0658	144	44.91
CBU_2021	432	39.2767
CBU_0693	350	44.0967
CBU_1381	273	41.1467
CBU_1133	268	44.1533
CBU_0073	608	44.9567
CBU_0362	402	41.46
CBU_1706	201	46.1033
CBU_0664	382	42.1467
CBU_1492	382	42.1467
CBU_1555	382	42.1467
CBU_0321	258	43.2833
CBU_0363	311	45.7567
CBU_1770	439	43.81
CBU_0934	305	41.97
CBU_1242	409	42.4633
CBU_1525	1010	41.5467
CBU_1933	285	40.2333
CBU_0282	171	40.1533
CBU_1075	384	41.4933
CBU_0728	270	44.0733
CBU_1869	218	39.7567
CBU_0847	255	47.32
CBU_1876	255	44.8367
CBU_0546	349	42.7867
CBU_1285	453	41.28
CBU_1291	198	48.3133
CBU_1171	151	41.9433
CBU_1774	146	47.7167
CBU_0744	193	41.9667
CBU_0912	475	44
CBU_0218	517	41.4567
CBU_1893	361	43.2133
CBU_2013	366	44.5333
CBU_1749a	89	43.0733
CBU_0424	267	42.6967
CBU_0593	384	38.5233
CBU_1504	257	41.3733
CBU_0280	373	42.36
CBU_0430	499	43.2867
CBU_0501	42	42.8567
CBU_0607	504	43.1233
CBU_1755	42	45.24
CBU_2095	311	41.7967
CBU_2066	275	40.0467
CBU_1825	116	38.5067
CBU_1336	306	39.2167
CBU_0046	381	43.1167
CBU_0936	190	43.86
CBU_1414	264	41.4167
CBU_0106	37	42.3433
CBU_0335	222	40.24
CBU_0863	37	42.3433
CBU_1969	148	44.37
CBU_1537	414	43.8
CBU_1475	478	43.7233
CBU_0548	335	41.5933
CBU_1000	234	44.02
CBU_0485	539	43.29
CBU_1052	866	44.69
CBU_1156	268	44.7767
CBU_1520	86	44.5733
CBU_0366	253	42.03
CBU_2089	194	37.4567
CBU_0499	162	46.9133
CBU_1096a	27	39.5067
CBU_1688	189	41.9733
CBU_1399	935	44.03
CBU_1695	547	42.4767
CBU_1797	147	43.0833
CBU_0618	365	40.9133
CBU_0274	955	45.4433
CBU_0290	71	38.97
CBU_0350	235	41.1333
CBU_0620	377	42.3533
CBU_1050	71	42.7233
CBU_1632	793	42.2867
CBU_0771	291	45.8167
CBU_1598	732	41.09
CBU_0246	66	42.4267
CBU_0154	352	40.06
CBU_0654	497	35.1733
CBU_0229	127	44.6167
CBU_0576	684	44.4967
CBU_0926	298	44.8533
CBU_1582	127	42.5167
CBU_0454	232	46.8367
CBU_0468	83	42.57
CBU_1529	637	46.2067
CBU_1245	444	45.1967
CBU_0730	200	42.5
CBU_1244	512	42.2533
CBU_0221a	39	47.8667
CBU_1272	39	47.8667
CBU_1674	429	44.7567
CBU_1118	251	43.56
CBU_0094	860	44.6933
CBU_0609	341	43.01
CBU_1740	56	49.4067
CBU_0330	555	45.2233
CBU_0608	314	44.6933
CBU_0012	271	41.2567
CBU_0763	197	40.6133
CBU_1646	445	39.9967
CBU_1788	197	43.4867
CBU_1057	248	43.01
CBU_1418	158	45.15
CBU_0297	260	41.7933
CBU_0489	345	41.3533
CBU_0332	68	38.7267
CBU_1690	34	37.2567
CBU_1764a	119	40.06
CBU_1814	238	45.94
CBU_1845	204	37.9067
CBU_1921	34	47.06
CBU_1240	340	46.7667
CBU_1587	136	41.9133
CBU_2056	221	44.3433
CBU_0189	404	35.43
CBU_0136	466	44.92
CBU_1038	199	39.7
CBU_1094	381	44.0933
CBU_1191	786	46.0967
CBU_0526	439	46.9233
CBU_0338	902	42.4967
CBU_0461	885	44.22
CBU_1622	1004	44.89
CBU_1066	594	43.8267
CBU_0299	240	46.53
CBU_2051a	80	40.4167
CBU_1100	143	47.32
CBU_1117	315	46.0333
CBU_0238	218	47.2467
CBU_0778	173	39.77
CBU_1261	419	44.47
CBU_0020	184	43.6567
CBU_0164	323	40.2867
CBU_2020	477	40.88
CBU_0906	433	42.2633
CBU_0589	133	43.8567
CBU_0293	162	47.3267
CBU_1260	249	44.3133
CBU_1556	568	42.1933
CBU_0797	527	40.1667
CBU_0773	157	44.16
CBU_0920	372	44.0867
CBU_0027	297	39.84
CBU_0942	128	47.3967
CBU_1681	99	42.7567
CBU_1527	461	41.5767
CBU_0147	917	44.9667
CBU_1366	111	40.84
CBU_0886a	370	42.5033
CBU_0153	287	42.0433
CBU_2049	357	44.4433
CBU_1731	465	43.23
CBU_0197	930	44.16
CBU_0213	53	40.2533
CBU_0270	407	45.4533
CBU_0891	313	46.3267
CBU_0351	118	42.3733
CBU_0615	260	45.2567
CBU_1202	284	41.55
CBU_0470	219	45.3567
CBU_1922	474	44.6533
CBU_1201	344	44.5733
CBU_1035b	494	41.66
CBU_1130	690	44.9733
CBU_2087	113	44.2467
CBU_0746	250	44
CBU_0560	411	41.85
CBU_0896	185	39.2767
CBU_0014	418	43.7
CBU_0962	233	42.2033
CBU_0777	305	41.7467
CBU_1141	305	42.5133
CBU_1934a	36	50.0033
CBU_0374	289	36.3833
CBU_0711	48	36.8067
CBU_0911	48	47.9167
CBU_1093	1020	41.83
CBU_1901	444	44.07
CBU_1210	776	41
CBU_0175	247	39.5433
CBU_0735	283	45.7033
CBU_0823	566	43.9933
CBU_1229	863	43.6067
CBU_1074	187	46.1667
CBU_0264	127	46.72
CBU_1639a	116	43.6433
CBU_1854	103	41.75
CBU_0804	1013	43.4033
CBU_1623	213	44.44
CBU_0315	244	42.0733
CBU_0764	812	42.1367
CBU_0313	500	43.4667
CBU_0286	440	43.94
CBU_0705	110	37.2733
CBU_1264	197	40.6833
CBU_0929	282	41.25
CBU_1803	43	38.76
CBU_0452	418	42.1067
CBU_1487	461	43.17
CBU_1545	161	32.8
CBU_1884	160	39.5867
CBU_1981	308	47.0767
CBU_0033	234	44.5867
CBU_0480	160	41.6667
CBU_1143	117	45.87
CBU_0002	370	43.6033
CBU_0377	74	43.6933
CBU_0209	327	43.5267
CBU_1664	198	41.92
CBU_2002	167	48.1033
CBU_1358	427	43.2467
CBU_0867	155	46.0233
CBU_1278	186	42.6533
CBU_0488	236	43.7867
CBU_0850	298	39.3767
CBU_1280	174	44.06
CBU_1351	298	43.6267
CBU_0581	112	45.83
CBU_1675	281	45.7867
CBU_0251	100	46.3333
CBU_0400a	50	44.6667
CBU_0632	100	44.6667
CBU_1666	577	38.81
CBU_0861	614	45.0067
CBU_1763	445	44.1933
CBU_0600	534	39.6667
CBU_1662	69	46.3767
CBU_0852	697	47.25
CBU_0341	333	46.4467
CBU_0557	340	44.4133
CBU_0507	347	42.7433
CBU_1258	145	44.3667
CBU_1730	259	42.8567
CBU_1842	368	44.8367
CBU_1162	444	41.89
CBU_1091	750	44.93
CBU_1822	197	44.84
CBU_2069	197	44.33
CBU_0917	402	35.19
CBU_1438	102	37.5833
CBU_0407a	166	40.7633
CBU_1138	249	42.9733
CBU_0353	339	43.3633
CBU_0307	232	47.99
CBU_0709	278	37.1033
CBU_0808	921	44.4467
CBU_1274	161	43.8933
CBU_0776	284	39.3167
CBU_0940	355	45.6333
CBU_1653	143	44.62
CBU_0565	284	42.4867
CBU_1338	374	45.1867
CBU_1433	504	45.4367
CBU_1907	239	45.4667
CBU_0322	291	41.9233
CBU_0248	123	43.6333
CBU_1251	254	44.6
CBU_0413	417	36.0067
CBU_0445	182	47.9867
CBU_1320	104	44.8733
CBU_1413	260	44.4867
CBU_1778	364	48.17
CBU_0512	346	40.6
CBU_1443	423	45.9433
CBU_0225	189	43.0333
CBU_1345	430	41.3967
CBU_1334	378	39.42
CBU_0395	229	44.6867
CBU_1281	1074	45.7467
CBU_1125	473	42.5933
CBU_1276	269	45.6
CBU_0278	198	40.74
CBU_0630	231	43
CBU_1574	238	43.98
CBU_0584	106	50
CBU_1059	245	47.89
CBU_1903	325	44.2067
CBU_0431	259	42.9867
CBU_1360	485	44.0567
CBU_1467	478	47.49
CBU_1517	153	44.88
CBU_1483	459	45.6067
CBU_0227	233	46.0667
CBU_1227	233	46.6367
CBU_0127	40	44.1667
CBU_1743	200	45.3333
CBU_1911	40	49.1667
CBU_0301	207	44.4433
CBU_0559	821	43.89
CBU_0973	388	46.3933
CBU_0946a	262	42.8033
CBU_1533	650	39.3567
CBU_1255	268	43.7833
CBU_1250	47	46.1
CBU_1886	47	35.46
CBU_0360	431	38.47
CBU_0888	148	41.44
CBU_0649	364	41.0233
CBU_0354	526	44.3633
CBU_1927	291	46.2767
CBU_0312	284	47.77
CBU_2019	542	43.9733
CBU_1112	122	38.25
CBU_0807	380	44.21
CBU_2057	326	42.2267
CBU_1792x	348	41.3233
CBU_1967	410	42.1933
CBU_2014a	493	41.8133
CBU_0178	253	43.3467
CBU_0202	179	38.6267
CBU_0729	309	43.15
CBU_0868	611	47.0833
CBU_2032	255	39.35
CBU_1237	131	42.24
CBU_1944	290	44.9433
CBU_0910	325	43.4867
CBU_0647	388	46.22
CBU_0974	395	47.0033
CBU_1239	194	45.0167
CBU_1708	194	42.2667
CBU_2048	776	43.8133
CBU_1659	437	43.25
CBU_1809	222	42.7933
CBU_0396	937	45.7133
CBU_1926	257	45.7833
CBU_0893	292	46.69
CBU_1203	551	45.7967
CBU_0247	84	42.0633
CBU_0519	203	41.0533
CBU_0943	147	41.0433
CBU_0967	35	39.0467
CBU_1982	259	41.3133
CBU_2073	301	41.0867
CBU_0777c	133	40.35
CBU_1389	463	43.8333
CBU_1215	584	42.1467
CBU_0109	268	44.9033
CBU_0272	459	43.1367
CBU_1595	573	46.0733
CBU_0558	184	45.65
CBU_1282	403	47.0633
CBU_1891	354	42.5633
CBU_0983	292	40.5733
CBU_0371	398	40.0333
CBU_0273	249	43.7767
CBU_0951	264	44.3133
CBU_0093	214	45.0167
CBU_0285	107	40.81
CBU_0520	300	46.4433
CBU_0889	200	45
CBU_1873	272	43.7467
CBU_0937a	172	44.7667
CBU_0095	323	42.2067
CBU_1649	165	40.4033
CBU_0913	158	45.57
CBU_0798	332	45.18
CBU_1439	202	41.0867
CBU_0927	499	46.6267
CBU_1531	444	41.7
CBU_1913	320	46.3533
CBU_0001	452	44.69
CBU_0659	510	45.9467
CBU_1207	51	47.06
CBU_1657	255	43.9233
CBU_0922	438	43.9867
CBU_1410	431	43.93
CBU_0179	373	46.29
CBU_0713	417	45.0067
CBU_1997	315	46.9833
CBU_0084	639	42.9333
CBU_1233	301	46.7333
CBU_1440	169	44.7767
CBU_1519	162	44.8533
CBU_1993	162	40.9467
CBU_0761	37	49.55
CBU_1502	296	43.2433
CBU_1597	37	44.1433
CBU_0231	1378	45.4767
CBU_0199	319	41.5867
CBU_0646	208	42.1467
CBU_0458	134	44.5267
CBU_1147	372	43.9967
CBU_2055	238	45.1
CBU_0035	425	48.86
CBU_1905	314	41.93
CBU_0641	383	46.2133
CBU_0463	475	44.9133
CBU_0096	392	43.6233
CBU_1658	362	44.3833
CBU_1733	634	44.7967
CBU_0667	272	44.4833
CBU_0081	567	46.6233
CBU_0722	401	44.72
CBU_1252	371	45.1933
CBU_0294	472	45.3367
CBU_0481	251	44.89
CBU_1619	176	37.0133
CBU_0030	396	44.61
CBU_2005	426	43.4267
CBU_1489	244	42.8967
CBU_1751	421	44.42
CBU_0241	276	50
CBU_0800	138	42.27
CBU_1159	46	39.13
CBU_1214	46	39.13
CBU_0845	430	45.1167
CBU_2031	439	45.1033
CBU_2024	317	45.8433
CBU_0533	356	40.45
CBU_1031	147	44.2167
CBU_0638	379	48.0233
CBU_1586	124	42.2067
CBU_1777	62	40.86
CBU_0253	179	47.1133
CBU_1741	397	45.8433
CBU_0516	39	46.1533
CBU_0937	484	45.7333
CBU_1727	337	40.9467
CBU_1950	149	42.73
CBU_1061a	369	43.45
CBU_1644	275	46.67
CBU_1462a	55	37.5767
CBU_1536	520	46.41
CBU_0383	213	39.2767
CBU_0611	804	44.4033
CBU_0123	490	46.6
CBU_1550	767	46.8067
CBU_2033	87	40.9967
CBU_0753	1023	43.0133
CBU_1035	469	43.9233
CBU_1602	302	44.37
CBU_1745	231	42.4233
CBU_1578	279	41.3367
CBU_0089	32	47.9167
CBU_1999	160	42.29
CBU_1035d	112	36.6067
CBU_1864	32	30.2067
CBU_1088	489	50.24
CBU_0721	354	44.8233
CBU_0314	258	47.2867
CBU_0412	137	44.77
CBU_2010	105	46.0333
CBU_2025	388	46.13
CBU_0116	308	46.97
CBU_1352	648	46.5533
CBU_1447	162	47.9433
CBU_0226	146	47.26
CBU_0522	57	41.52
CBU_1100a	57	42.1033
CBU_1846	155	46.02
CBU_1726	449	46.6267
CBU_1174	140	43.9133
CBU_1225	303	43.8933
CBU_0511	427	42.1467
CBU_1054	344	46.9967
CBU_1596	699	45.4433
CBU_0303	708	45.95
CBU_1718	553	46.9533
CBU_1808	405	44.1133
CBU_1943	516	46.1233
CBU_1530a	100	41.6667
CBU_0135	359	47.8167
CBU_0814	618	42.0167
CBU_1503	234	45.87
CBU_1570	352	47.4433
CBU_0346	495	47.0033
CBU_1371	227	45.96
CBU_0528	556	45.56
CBU_1655	497	47.4133
CBU_0103	481	45.0433
CBU_1248	422	46.7633
CBU_1122	254	43.5667
CBU_1282a	534	43.4367
CBU_0698	390	42.48
CBU_0387	340	48.04
CBU_0585	68	42.6467
CBU_1450	272	49.51
CBU_0886	392	45.92
CBU_2042	547	37.6267
CBU_0364	444	46.2467
CBU_1321	793	46.5767
CBU_0355	628	41.4233
CBU_0245	138	49.76
CBU_0498	371	44.1133
CBU_0995	95	40
CBU_0343	294	41.0433
CBU_0234	192	49.3067
CBU_1259	533	41.84
CBU_0855	770	46.1933
CBU_0925	334	46.1067
CBU_1262	88	40.53
CBU_1978	871	44.3933
CBU_0569	440	46.1367
CBU_1372	194	44.5033
CBU_1634	239	43.79
CBU_1902	460	45.3633
CBU_0098	275	45.4533
CBU_0180	453	43.71
CBU_0255	169	49.7033
CBU_1241	329	47.1133
CBU_1513	259	45.69
CBU_1660	295	44.86
CBU_1812	376	44.9467
CBU_1396	295	49.1533
CBU_1648	815	46.0533
CBU_0964a	63	37.5633
CBU_1798	648	43.2067
CBU_0156a	54	44.4433
CBU_0872	216	43.98
CBU_1184	243	42.11
CBU_1294	126	40.7367
CBU_1385	297	47.5867
CBU_2046	36	43.5167
CBU_1040	299	43.4767
CBU_0599	272	45.7133
CBU_0265	409	40.6667
CBU_1224	427	43.7933
CBU_0864	128	44.27
CBU_0521	485	46.2567
CBU_1551	229	48.0333
CBU_1940	101	47.5233
CBU_1896	413	42.6133
CBU_0856	597	43.89
CBU_1436	507	42.2133
CBU_0731	157	42.25
CBU_1753	139	42.4467
CBU_1631	213	46.6333
CBU_1862	343	45.7733
CBU_0054	186	45.5167
CBU_1957	457	43.69
CBU_1772	206	45.47
CBU_0221	244	47.6767
CBU_1228	479	45.6533
CBU_1699	519	46.37
CBU_1918	123	44.4467
CBU_1795	903	44.0767
CBU_0535	324	49.69
CBU_1946	143	47.0867
CBU_1955	420	47.38
CBU_0075	411	47.2833
CBU_0996	306	43.0267
CBU_1970	277	48.5
CBU_0043	201	48.0933
CBU_1932	67	43.78
CBU_0055	288	44.3267
CBU_0460	259	43.8867
CBU_1744	192	47.9167
CBU_2092	518	48.7133
CBU_1747	221	42.99
CBU_1243	415	46.8267
CBU_0426a	29	44.8267
CBU_0504	493	43.2733
CBU_1430	310	46.8833
CBU_1441	341	45.16
CBU_1476	312	44.7667
CBU_0107	352	43.4667
CBU_1412	274	45.7433
CBU_0007a	98	41.1567
CBU_1304	147	44.9
CBU_1342	490	48.1633
CBU_1636	392	43.6233
CBU_1055	167	47.3033
CBU_0287	187	48.6633
CBU_1442	788	47.5867
CBU_0098b	69	42.03
CBU_0955	218	45.72
CBU_0527	238	48.46
CBU_1909	289	46.9433
CBU_1096	460	44.49
CBU_1473	100	43
CBU_1709	240	44.5833
CBU_0173	151	40.1733
CBU_1367	604	46.8533
CBU_1425	151	50.77
CBU_1474	484	46.6267
CBU_0095a	131	42.7467
CBU_1471	353	49.9533
CBU_1549	262	47.5833
CBU_0522a	91	43.22
CBU_1075a	91	43.22
CBU_1570a	91	43.22
CBU_1590a	91	43.22
CBU_1959a	91	43.22
CBU_0006a	91	43.22
CBU_0040a	91	43.22
CBU_0048	333	45.1467
CBU_0384a	91	43.22
CBU_0554a	91	43.22
CBU_1090a	91	43.22
CBU_1186a	91	43.22
CBU_1785a	91	43.22
CBU_1896b	91	43.22
CBU_1987c	91	43.22
CBU_1488	466	45.85
CBU_2094	142	45.7733
CBU_1333	264	43.1833
CBU_1332	51	45.7533
CBU_1051	410	47.8867
CBU_0058	31	38.71
CBU_1929	465	44.5867
CBU_0151	279	44.6833
CBU_0477	93	42.2933
CBU_1383	186	45.88
CBU_2054	724	46.18
CBU_0244	228	48.3933
CBU_1403	166	41.9667
CBU_1446	228	46.7833
CBU_0904	354	47.27
CBU_1482	250	44.2667
CBU_0118	553	47.5
CBU_0988	230	46.38
CBU_0146	115	46.3767
CBU_1758b	115	42.32
CBU_1079	199	44.7267
CBU_1326	661	46.7433
CBU_0966	378	43.3867
CBU_1331	126	44.9767
CBU_1692a	42	40.4767
CBU_1064	95	42.1033
CBU_1437	654	44.75
CBU_0200	296	46.96
CBU_2058	444	43.77
CBU_1811	508	45.8667
CBU_1971	53	42.7667
CBU_0426	647	44.5133
CBU_1157	234	46.4367
CBU_1865	181	44.0133
CBU_0734	75	52.8867
CBU_1509	450	46
CBU_1179	399	43.1067
CBU_1781	485	45.36
CBU_0670	421	48.9333
CBU_0031	313	47.8167
CBU_0738	196	45.7467
CBU_1882	436	47.3233
CBU_1089	33	41.41
CBU_1132	33	39.39
CBU_1699b	99	43.43
CBU_1347	475	42.4533
CBU_1732	389	44.3867
CBU_0810	356	44.1033
CBU_1994	268	44.2767
CBU_1720	918	47.3133
CBU_1766	817	46.6333
CBU_1319	112	45.24
CBU_1975	237	45.57
CBU_0392	576	40.71
CBU_0467	283	46.5233
CBU_0065	125	44.5333
CBU_0574	432	48.6867
CBU_0884	603	46.8233
CBU_0780	217	45.7733
CBU_0895	206	45.63
CBU_0037	206	46.2767
CBU_1589	103	48.5433
CBU_1769	206	45.7933
CBU_1131	241	48.27
CBU_1558	92	44.9267
CBU_0382	333	46.75
CBU_1966	414	47.7433
CBU_1789	289	47.1733
CBU_1116	370	48.38
CBU_0117	116	44.2533
CBU_1484	429	45.6867
CBU_2012	466	47.4267
CBU_1748	140	52.8567
CBU_0890	234	44.3033
CBU_1510	317	46.7933
CBU_0443	247	49.3933
CBU_2072	166	44.5767
CBU_1696	214	48.2867
CBU_1422	452	48.38
CBU_0257	144	50.46
CBU_1870	216	45.9867
CBU_0162b	48	40.2767
CBU_1273	421	47.5867
CBU_0909	205	49.43
CBU_0666	375	45.69
CBU_1670	231	50.94
CBU_0455	122	42.0767
CBU_0298	281	46.03
CBU_0853	159	44.4433
CBU_0865	74	44.1467
CBU_0114	161	42.65
CBU_2071	161	42.0267
CBU_1627	1040	50.8
CBU_1424	335	48.5567
CBU_0317	237	46.27
CBU_0056	617	47.65
CBU_0657	202	47.5267
CBU_1624	139	45.5633
CBU_0194	456	47.4433
CBU_1142	623	46.6567
CBU_0124	447	47.95
CBU_0224	128	47.1333
CBU_1350	447	46.61
CBU_0233	141	51.5367
CBU_0347	464	44.3967
CBU_0505	206	42.72
CBU_1633	388	45.1867
CBU_0491	65	49.74
CBU_0662	39	45.2967
CBU_1256	39	43.59
CBU_1269a	130	43.0733
CBU_1565	611	46.5333
CBU_0026	221	46.1533
CBU_0337	104	45.8333
CBU_1301	156	44.87
CBU_1630	208	43.1067
CBU_1716b	104	43.2667
CBU_1894a	52	52.5633
CBU_0892	262	49.2367
CBU_1986	314	45.65
CBU_1756	394	45.3467
CBU_1771	582	44.7867
CBU_0790	1063	43.1933
CBU_0291	80	43.3333
CBU_1197	67	43.7833
CBU_1841	188	47.1633
CBU_0597	376	44.15
CBU_1874	436	45.72
CBU_0025	41	44.7133
CBU_0174	82	43.4933
CBU_2023	82	41.4633
CBU_1539	427	43.0133
CBU_1645	373	49.42
CBU_0024	69	47.3433
CBU_1427	1948	39.7067
CBU_2050	346	44.7467
CBU_0426b	319	46.81
CBU_1391	264	41.2233
CBU_1553	942	45.6833
CBU_0503	360	50.9267
CBU_0707	97	45.7033
CBU_1185	610	47.32
CBU_0275	362	47.6067
CBU_0064	642	46.21
CBU_1193	321	48.3933
CBU_0091	196	47.45
CBU_0232	1415	47.9133
CBU_1419	420	48.0933
CBU_1362	379	44.4133
CBU_0451	183	43.9
CBU_1223	310	46.7733
CBU_2029	211	44.5533
CBU_1449	99	49.1567
CBU_1353	213	44.9133
CBU_1039	669	43.25
CBU_0027a	573	44.24
CBU_0103a	532	41.0067
CBU_1432	804	49.2133
CBU_0979	101	51.1567
CBU_0283	58	40.8033
CBU_0442	116	47.99
CBU_1511	262	45.5433
CBU_1987	292	45.8933
CBU_1735	382	46.86
CBU_0924	223	45.59
CBU_1386	360	45.9267
CBU_1505	615	47.8067
CBU_0517	424	46.7767
CBU_1600	182	47.9867
CBU_0235	700	48.57
CBU_0648	152	46.2733
CBU_1267	683	45
CBU_1092	77	49.7833
CBU_0108	201	46.27
CBU_1401	588	48.5833
CBU_1435	483	43.4767
CBU_1693	612	38.3133
CBU_0656	111	42.0433
CBU_1071	143	44.0533
CBU_1887	794	47.94
CBU_0004	811	46.9367
CBU_0448	32	38.5433
CBU_1305	160	46.25
CBU_1995	96	46.53
CBU_0640	369	48.96
CBU_1072	386	47.41
CBU_1834	305	43.61
CBU_1945	484	48.28
CBU_1829	211	46.92
CBU_1289	375	51.1967
CBU_1724a	49	45.58
CBU_1271	542	44.9233
CBU_0429	132	49.7467
CBU_2059	531	40.8933
CBU_2068	447	45.9367
CBU_1554	402	44.36
CBU_0060	539	40.54
CBU_0045	187	47.7733
CBU_1490	104	45.5133
CBU_1523	336	44.7367
CBU_0809	373	44.59
CBU_0450	462	45.8167
CBU_0115	161	48.86
CBU_1875	322	46.1667
CBU_0044	252	46.43
CBU_0784	36	48.1467
CBU_0067	108	42.9
CBU_0994	36	58.33
CBU_0497	415	49.8
CBU_0125	362	44.3833
CBU_1469	163	44.3767
CBU_0063	436	48.0133
CBU_0960	184	44.7467
CBU_0101	537	49.16
CBU_2011	205	47.8067
CBU_0352	298	46.9833
CBU_0598	188	47.1633
CBU_0444	169	44.97
CBU_0237	114	46.7867
CBU_0357	76	50.8767
CBU_0243	116	48.85
CBU_0570	561	44.4433
CBU_0756	213	51.1733
CBU_0228	175	51.0467
CBU_0141	394	49.9133
CBU_0385	118	46.3267
CBU_0205	474	47.61
CBU_1067	257	43.32
CBU_1024	816	38.4167
CBU_1866	754	46.7733
CBU_1280a	80	46.6667
CBU_0112	343	47.5233
CBU_1653a	61	42.0767
CBU_0008a	185	42.5233
CBU_0539	536	43.6567
CBU_0749	166	49.1967
CBU_1521	145	44.8267
CBU_0486	721	50.44
CBU_1265	243	45.68
CBU_1840	245	49.6633
CBU_1626	245	48.3033
CBU_0851	90	45.1833
CBU_1103	427	48.1667
CBU_0755	452	47.42
CBU_1736	364	48.9933
CBU_0751	435	49.0433
CBU_0097	255	46.14
CBU_1880	140	40.9533
CBU_0965	522	45.0167
CBU_1043	215	46.2033
CBU_0242	96	47.2233
CBU_0336	528	48.8667
CBU_0195	434	46.93
CBU_0023	171	46.3933
CBU_1290	657	47.8967
CBU_2022	474	51.41
CBU_1048	757	45.9067
CBU_1682	556	48.26
CBU_1390	180	42.68
CBU_1354	181	46.9633
CBU_0258	443	44.3933
CBU_1973	52	39.1033
CBU_0206	131	42.24
CBU_1924	628	49.4167
CBU_1077	314	50
CBU_0613	343	49.1733
CBU_0825	370	47.6567
CBU_1816	189	48.6767
CBU_0459	407	43.2433
CBU_1566	245	49.3867
CBU_0621	328	47.1567
CBU_0714	137	47.69
CBU_1417	139	43.8867
CBU_0068a	56	47.0233
CBU_0156	141	48.4633
CBU_0747	143	45.6867
CBU_0441	172	48.0633
CBU_0537	58	48.2767
CBU_1983	145	47.3567
CBU_1784	673	48.8833
CBU_1183	118	48.59
CBU_0276	360	47.2233
CBU_1445	418	47.7667
CBU_1388	271	46.9867
CBU_0386	91	50.1833
CBU_0941	91	46.1533
CBU_1518	333	49.35
CBU_0716a	557	47.3067
CBU_0316	155	48.8167
CBU_0365	31	45.1633
CBU_0551	156	48.3967
CBU_2008	593	46.77
CBU_1629	219	43.5333
CBU_0737	443	47.4767
CBU_0555	68	50.49
CBU_1249	204	45.75
CBU_1590	418	43.06
CBU_1538	457	46.0967
CBU_1034	212	47.3267
CBU_0300	288	46.76
CBU_2017	251	46.6167
CBU_0849	296	47.41
CBU_0854	37	46.85
CBU_1552	37	45.9467
CBU_0866	300	44.5567
CBU_1920	567	46.68
CBU_0997	39	43.5933
CBU_0072	400	45.8333
CBU_1195	84	49.2067
CBU_0340	313	44.41
CBU_0759	316	39.5033
CBU_0818	194	42.9567
CBU_1296	300	47.6667
CBU_1187	216	46.45
CBU_1461	757	42.6
CBU_1212a	55	45.4533
CBU_0588	332	48.4967
CBU_1947	456	48.17
CBU_1470	293	47.5533
CBU_0572	459	49.2367
CBU_1472	67	45.77
CBU_1754	199	49.5833
CBU_1170	69	40.58
CBU_0434a	73	47.49
CBU_1765	73	45.6667
CBU_1650	150	46.6667
CBU_0774	83	44.1767
CBU_1325	170	47.2533
CBU_1376	455	47.5467
CBU_1023a	93	40.5
CBU_2026	201	47.7467
CBU_1573	412	47.0067
CBU_0921	105	43.81
CBU_1796	543	48.1267
CBU_0639	327	49.7467
CBU_0736	218	46.33
CBU_0586	1172	48.92
CBU_2006	246	48.9133
CBU_0053	250	47.4667
CBU_1494	252	49.47
CBU_1749	143	47.7833
CBU_1266	316	49.5767
CBU_1080	161	50.7233
CBU_0415	169	47.9267
CBU_0140	414	50.4833
CBU_0318	215	52.0933
CBU_1671	259	50.1967
CBU_1200	429	48.0167
CBU_0130	60	44.4433
CBU_0256	64	46.8733
CBU_0433	174	43.2967
CBU_0587	108	43.8267
CBU_1376a	12	44.4433
CBU_1477	180	47.2233
CBU_1760	38	50
CBU_1947a	62	48.3867
CBU_0181a	86	43.0233
CBU_0394	40	44.1667
CBU_0610	358	49.35
CBU_1020	84	44.4467
CBU_1139	46	44.2033
CBU_1180	44	50
CBU_1402	116	42.5267
CBU_1497	44	43.1833
CBU_1628	352	49.15
CBU_1683	44	46.2133
CBU_1867a	48	48.61
CBU_1723	631	48.39
CBU_1046	594	46.7167
CBU_0795	189	44.7933
CBU_0090	441	48.2233
CBU_1843	135	41.4833
CBU_0982	361	48.6633
CBU_1429a	115	44.9267
CBU_1737	216	49.07
CBU_1559	210	47.94
CBU_1998	309	50.27
CBU_1689	307	49.8367
CBU_1579	198	50.34
CBU_0748	196	46.94
CBU_1001	415	45.7
CBU_0757	328	50.9167
CBU_1269	164	50.8133
CBU_0083	81	45.2667
CBU_1434	154	50.8667
CBU_1925	205	46.18
CBU_0416	61	54.1
CBU_1384	244	49.18
CBU_1567	173	51.2533
CBU_2001	57	47.37
CBU_1830	320	48.75
CBU_0566	422	47.63
CBU_1303	102	49.3467
CBU_0149	49	49.66
CBU_0544	94	45.0333
CBU_2003a	47	50.3533
CBU_0743	90	44.4433
CBU_1702	45	44.4433
CBU_0550	616	46.8633
CBU_0495	250	50.4
CBU_0214	240	45.9733
CBU_0291b	119	48.46
CBU_0432	429	48.64
CBU_1951	39	44.4433
CBU_0514a	37	45.9433
CBU_0803	352	48.8633
CBU_0663	35	46.67
CBU_0369	35	50.4767
CBU_1661	344	50.9667
CBU_0487	309	50.0533
CBU_0478	33	46.4633
CBU_0032	93	49.4633
CBU_0122	93	51.97
CBU_0538	31	54.8367
CBU_1939	265	45.1567
CBU_1561	263	44.4867
CBU_16SA	486	53.8067
CBU_0796	114	50.2933
CBU_1699a	365	48.4
CBU_1758a	355	48.3567
CBU_1844	54	50.6167
CBU_0494	314	50.7433
CBU_1498	390	48.29
CBU_1302	127	44.8833
CBU_1594	150	47.5533
CBU_0006	365	48.49
CBU_0040	365	48.49
CBU_0384	365	48.49
CBU_0554	365	48.49
CBU_1090	365	48.49
CBU_1186	365	48.49
CBU_1217a	365	48.49
CBU_1716a	365	48.49
CBU_1785	365	48.58
CBU_1896a	365	48.49
CBU_1987b	365	48.49
CBU_0523	365	48.49
CBU_1076	365	48.58
CBU_1270	365	48.58
CBU_1570b	365	48.49
CBU_1590b	365	48.49
CBU_1639c	365	48.49
CBU_1959b	365	48.49
CBU_0144	429	45.4967
CBU_0552	117	48.15
CBU_1849	67	47.2633
CBU_1931	44	46.9667
CBU_2030	394	52.1133
CBU_0390	516	49.29
CBU_1625	170	46.86
CBU_0752a	61	50.2733
CBU_0510a	40	50
CBU_1235	184	48.7333
CBU_1429	182	46.52
CBU_1725	155	50.5367
CBU_1552a	34	40.1967
CBU_1643	170	49.41
CBU_2003	187	51.3367
CBU_0277	51	57.5167
CBU_0622	149	51.4533
CBU_0201	132	47.7267
CBU_1463	66	50.5067
CBU_1938	162	50.8233
CBU_1642	113	47.4933
CBU_1568	201	49.9167
CBU_1361	154	49.1367
CBU_0099	160	51.46
CBU_0905	80	48.75
CBU_0019	37	53.15
CBU_1948	59	54.24
CBU_1408	35	51.43
CBU_1411	57	56.7267
CBU_0469	68	47.0567
CBU_0274a	55	47.88
CBU_0724c	22	42.4233
CBU_1522	42	50
CBU_0750	325	51.0767
CBU_0312a	40	50.8333
CBU_0596a	80	50.8333
CBU_0434	40	50
CBU_1013a	137	43.2033
CBU_0993	171	48.93
CBU_1316a	36	50
CBU_1767	90	49.26
CBU_1177	61	54.6467
CBU_1641	86	50
CBU_0307a	82	53.66
CBU_1647	32	52.0833
CBU_0660	55	53.9367
CBU_1878	140	50
CBU_0143	44	56.06
CBU_0742	49	57.8233
CBU_0230	40	51.6667
CBU_1541	33	52.5267
CBU_1144	118	51.6967
CBU_1161	31	48.3867
CBU_0162	533	43.9
CBU_1172	478	49.0633
CBU_1635	58	56.8967
CBU_1323a	34	49.02
CBU_1526a	32	45.8367
CBU_0037a	62	51.0767
CBU_1881	58	50.5733
CBU_0110a	66	57.0733
CBU_1348	56	58.9267
CBU_0536	41	58.5367
CBU_2036	59	53.11
[truncated: 18 more rows]

## Sheet: ORF_GCpercent
Name	Length	%GC ORF	%GC 1st codon	%GC codon	%GC 3 codon
CBU_0001	452	44.69	53.32	37.61	43.14
CBU_0002	370	43.6033	53.51	35.41	41.89
CBU_0003	358	43.11	54.47	36.31	38.55
CBU_0004	811	46.9367	57.21	36.74	46.86
CBU_0006	365	48.49	53.42	40	52.05
CBU_0006a	91	43.22	47.25	37.36	45.05
CBU_0007	71	30.9833	33.8	25.35	33.8
CBU_0007a	98	41.1567	45.92	32.65	44.9
CBU_0008	63	38.6233	36.51	44.44	34.92
CBU_0008a	185	42.5233	45.95	34.05	47.57
CBU_0009	478	42.5367	49.79	38.91	38.91
CBU_0010	273	42.6133	56.41	37	34.43
CBU_0011	35	23.81	28.57	11.43	31.43
CBU_0012	271	41.2567	47.6	35.06	41.11
CBU_0014	418	43.7	46.65	42.82	41.63
CBU_0015	239	38.0733	51.46	30.96	31.8
CBU_0016	274	44.2833	57.3	38.32	37.23
CBU_0017	242	43.5267	52.07	39.67	38.84
CBU_0018	148	34.2333	37.16	31.76	33.78
CBU_0019	37	53.15	54.05	51.35	54.05
CBU_0020	184	43.6567	58.15	31.52	41.3
CBU_0021	810	36.01	42.96	32.35	32.72
CBU_0022	270	38.0233	47.41	32.22	34.44
CBU_0023	171	46.3933	54.97	36.26	47.95
CBU_0024	69	47.3433	63.77	31.88	46.38
CBU_0025	41	44.7133	43.9	43.9	46.34
CBU_0026	221	46.1533	58.37	33.94	46.15
CBU_0027	297	39.84	44.44	33.67	41.41
CBU_0027a	573	44.24	45.38	40.84	46.5
CBU_0029	233	40.63	43.78	41.2	36.91
CBU_0030	396	44.61	47.98	42.42	43.43
CBU_0031	313	47.8167	55.59	42.49	45.37
CBU_0032	93	49.4633	48.39	48.39	51.61
CBU_0033	234	44.5867	51.28	40.6	41.88
CBU_0034	87	35.25	47.13	31.03	27.59
CBU_0035	425	48.86	55.29	48	43.29
CBU_0036	160	40	46.25	36.25	37.5
CBU_0037	206	46.2767	57.28	35.92	45.63
CBU_0037a	62	51.0767	50	43.55	59.68
CBU_0038	328	43.4933	50.3	41.16	39.02
CBU_0039	678	41.99	52.51	33.78	39.68
CBU_0040	365	48.49	53.42	40	52.05
CBU_0040a	91	43.22	47.25	37.36	45.05
CBU_0041	711	39.9467	44.59	36.85	38.4
CBU_0042	355	38.5933	45.92	37.18	32.68
CBU_0043	201	48.0933	58.21	41.29	44.78
CBU_0044	252	46.43	48.02	44.05	47.22
CBU_0045	187	47.7733	52.94	43.32	47.06
CBU_0046	381	43.1167	46.98	41.84	40.53
CBU_0047	314	45.1067	45.54	49.52	40.26
CBU_0048	333	45.1467	56.16	34.23	45.05
CBU_0049	437	39.6633	48.28	33.41	37.3
CBU_0050	201	40.63	48.76	35.82	37.31
CBU_0051	195	35.5567	45.13	28.72	32.82
CBU_0053	250	47.4667	51.6	41.2	49.6
CBU_0054	186	45.5167	51.61	40.32	44.62
CBU_0055	288	44.3267	50	38.19	44.79
CBU_0056	617	47.65	53.65	43.27	46.03
CBU_0057	43	67.4433	65.12	69.77	67.44
CBU_0057	43	67.4433	65.12	69.77	67.44
CBU_0058	31	38.71	32.26	38.71	45.16
CBU_0059	42	41.27	50	35.71	38.1
CBU_0060	539	40.54	35.81	38.78	47.03
CBU_0062	502	38.1133	45.42	32.07	36.85
CBU_0063	436	48.0133	55.28	41.51	47.25
CBU_0064	642	46.21	53.74	38.47	46.42
CBU_0065	125	44.5333	53.6	34.4	45.6
CBU_0065a	115	40.87	46.96	36.52	39.13
CBU_0066	198	39.8967	48.48	32.32	38.89
CBU_0067	108	42.9	53.7	27.78	47.22
CBU_0068	80	35.8333	46.25	30	31.25
CBU_0068a	56	47.0233	50	42.86	48.21
CBU_0069	722	43.25	45.15	45.49	39.11
CBU_0072	400	45.8333	55	33.75	48.75
CBU_0073	608	44.9567	55.59	38.98	40.3
CBU_0074	74	53.1533	51.35	45.95	62.16
CBU_0074	74	53.1533	51.35	45.95	62.16
CBU_0075	411	47.2833	56.69	40.39	44.77
CBU_0076	413	42.8567	52.06	38.01	38.5
CBU_0077	264	38.89	47.73	36.36	32.58
CBU_0079	330	36.6033	38.18	32.42	39.21
CBU_0081	567	46.6233	58.91	37.57	43.39
CBU_0083	81	45.2667	40.74	44.44	50.62
CBU_0084	639	42.9333	47.89	37.72	43.19
CBU_0085	52	39.7433	40.38	42.31	36.54
CBU_0086	253	42.2933	51.78	38.74	36.36
CBU_0087	648	40.4833	45.83	36.11	39.51
CBU_0088	272	42.0367	53.68	34.19	38.24
CBU_0089	32	47.9167	62.5	37.5	43.75
CBU_0089a	114	42.3967	45.61	42.11	39.47
CBU_0090	441	48.2233	51.93	42.4	50.34
CBU_0091	196	47.45	53.57	42.35	46.43
CBU_0092	306	41.6133	50	36.93	37.91
CBU_0093	214	45.0167	55.61	36.45	42.99
CBU_0094	860	44.6933	58.84	34.19	41.05
CBU_0095	323	42.2067	44.89	38.7	43.03
CBU_0095a	131	42.7467	41.98	41.22	45.04
CBU_0096	392	43.6233	51.02	36.48	43.37
CBU_0097	255	46.14	51.76	38.82	47.84
CBU_0098	275	45.4533	52.73	39.27	44.36
CBU_0098a	54	46.2967	53.7	46.3	38.89
CBU_0098b	69	42.03	44.93	36.23	44.93
CBU_0099	160	51.46	63.75	36.88	53.75
CBU_0100	134	36.07	35.82	32.84	39.55
CBU_0101	537	49.16	58.47	41.71	47.3
CBU_0102	38	35.9633	36.84	31.58	39.47
CBU_0103	481	45.0433	50.52	40.54	44.07
CBU_0103a	532	41.0067	39.47	37.03	46.52
CBU_0106	37	42.3433	48.65	37.84	40.54
CBU_0107	352	43.4667	50.57	34.94	44.89
CBU_0108	201	46.27	50.25	41.79	46.77
CBU_0109	268	44.9033	52.99	38.81	42.91
CBU_0110	162	37.6533	40.12	37.65	35.19
CBU_0110a	66	57.0733	54.55	56.06	60.61
CBU_0111	397	43.3267	53.15	37.03	39.8
CBU_0112	343	47.5233	53.94	41.11	47.52
CBU_0113	71	42.7233	47.89	45.07	35.21
CBU_0114	161	42.65	55.28	26.71	45.96
CBU_0115	161	48.86	58.39	40.99	47.2
CBU_0116	308	46.97	57.14	39.94	43.83
CBU_0117	116	44.2533	52.59	34.48	45.69
CBU_0118	553	47.5	56.24	41.05	45.21
CBU_0119	459	39.36	44.88	37.69	35.51
CBU_0121	44	30.3033	27.27	29.55	34.09
CBU_0122	93	51.97	56.99	47.31	51.61
CBU_0123	490	46.6	57.76	38.37	43.67
CBU_0124	447	47.95	56.82	40.94	46.09
CBU_0125	362	44.3833	47.51	38.4	47.24
CBU_0127	40	44.1667	42.5	47.5	42.5
CBU_0128	439	37.1833	39.86	36.99	34.7
CBU_0130	60	44.4433	40	43.33	50
CBU_0131	443	42.5133	51.47	38.15	37.92
CBU_0132	373	40.3933	45.31	37.53	38.34
CBU_0133	500	36.1567	39.4	31.8	37.27
CBU_0135	359	47.8167	58.77	40.67	44.01
CBU_0136	466	44.92	54.08	39.48	41.2
CBU_0137	317	43.0067	53.31	41.01	34.7
CBU_0138	244	38.6633	49.18	34.02	32.79
CBU_0139	207	38.97	44.93	32.37	39.61
CBU_0140	414	50.4833	62.8	38.89	49.76
CBU_0141	394	49.9133	60.91	41.37	47.46
CBU_0142	304	41.6667	48.36	37.17	39.47
CBU_0143	44	56.06	59.09	52.27	56.82
CBU_0144	429	45.4967	43.36	41.03	52.1
CBU_0146	115	46.3767	59.13	34.78	45.22
CBU_0147	917	44.9667	58.56	34.9	41.44
CBU_0148	138	41.5433	55.07	30.43	39.13
CBU_0149	49	49.66	51.02	46.94	51.02
CBU_0150	271	42.1867	51.29	35.42	39.85
CBU_0151	279	44.6833	49.82	39.07	45.16
CBU_0152	200	42.1667	54.5	33	39
CBU_0153	287	42.0433	47.39	37.28	41.46
CBU_0154	352	40.06	46.88	32.39	40.91
CBU_0155	518	42.02	51.16	36.87	38.03
CBU_0156	141	48.4633	51.06	46.1	48.23
CBU_0156a	54	44.4433	51.85	37.04	44.44
CBU_0157	34	30.39	35.29	29.41	26.47
CBU_0158	186	39.4267	47.85	34.95	35.48
CBU_0159	370	40.7233	48.92	37.84	35.41
CBU_0159a	220	42.2767	54.55	32.73	39.55
CBU_0161	418	37.0633	35.89	44.12	31.18
CBU_0162	533	43.9	38.84	34.4	58.46
CBU_0162b	48	40.2767	39.58	35.42	45.83
CBU_0164	323	40.2867	43.34	36.22	41.3
CBU_0165	197	37.9033	43.15	34.01	36.55
CBU_0166	255	31.11	42.35	26.67	24.31
CBU_0167	188	38.3	46.81	38.83	29.26
CBU_0169	415	29.1033	33.49	21.69	32.13
CBU_0173	151	40.1733	41.72	33.77	45.03
CBU_0174	82	43.4933	45.12	39.02	46.34
CBU_0175	247	39.5433	50.61	26.32	41.7
CBU_0176	396	40.2333	45.2	40.4	35.1
CBU_0177	527	40.9867	48.01	36.81	38.14
CBU_0178	253	43.3467	54.15	33.2	42.69
CBU_0179	373	46.29	52.55	43.16	43.16
CBU_0180	453	43.71	49.01	37.75	44.37
CBU_0181	400	42.1667	52.5	34.75	39.25
CBU_0181a	86	43.0233	34.88	44.19	50
CBU_0183	91	39.1933	53.85	28.57	35.16
CBU_0184	387	32.3	37.73	30.23	28.94
CBU_0185	351	32.9867	32.48	31.34	35.14
CBU_0187	384	31.37	31.51	25.52	37.08
CBU_0189	404	35.43	32.92	32.18	41.19
CBU_0191	328	37.3967	37.5	35.06	39.63
CBU_0193	404	36.0567	40.35	32.67	35.15
CBU_0194	456	47.4433	54.61	41.67	46.05
CBU_0195	434	46.93	50.23	42.63	47.93
CBU_0196	71	43.66	60.56	38.03	32.39
CBU_0197	930	44.16	49.57	41.4	41.51
CBU_0198	579	43.5233	49.91	41.11	39.55
CBU_0199	319	41.5867	49.53	31.97	43.26
CBU_0200	296	46.96	55.07	40.54	45.27
CBU_0201	132	47.7267	58.33	31.82	53.03
CBU_0202	179	38.6267	36.31	36.87	42.7
CBU_0205	474	47.61	56.33	39.03	47.47
CBU_0206	131	42.24	45.04	33.59	48.09
CBU_0207	102	33.9867	42.16	31.37	28.43
CBU_0208	291	36.7	39.18	32.3	38.62
CBU_0209	327	43.5267	48.01	40.67	41.9
CBU_0210	46	35.5067	43.48	23.91	39.13
CBU_0211	420	42.6033	50.48	40.1	37.23
CBU_0213	53	40.2533	43.4	35.85	41.51
CBU_0214	240	45.9733	46.67	40	51.25
CBU_0215	533	40.96	46.15	38.27	38.46
CBU_0216	427	37.4233	40.75	31.85	39.67
CBU_0217a	47	60.28	59.57	59.57	61.7
CBU_0217a	47	60.28	59.57	59.57	61.7
CBU_0218	517	41.4567	44.68	39.26	40.43
CBU_0218a	388	39.69	40.72	40.46	37.89
CBU_0220	40	32.5	32.5	30	35
CBU_0221	244	47.6767	56.97	41.39	44.67
CBU_0221a	39	47.8667	53.85	48.72	41.03
CBU_0221b	398	52.2633	57.29	37.19	62.31
CBU_0221b	398	52.2633	57.29	37.19	62.31
CBU_0224	128	47.1333	53.12	42.19	46.09
CBU_0225	189	43.0333	56.61	30.16	42.33
CBU_0226	146	47.26	52.05	45.89	43.84
CBU_0227	233	46.0667	54.94	40.77	42.49
CBU_0228	175	51.0467	64	41.71	47.43
CBU_0229	127	44.6167	59.84	33.07	40.94
CBU_0230	40	51.6667	47.5	50	57.5
CBU_0231	1378	45.4767	55.95	37.23	43.25
CBU_0232	1415	47.9133	58.23	39.08	46.43
CBU_0233	141	51.5367	59.57	48.94	46.1
CBU_0234	192	49.3067	61.98	41.67	44.27
CBU_0235	700	48.57	59.29	39.71	46.71
CBU_0236	398	52.2633	57.29	37.19	62.31
CBU_0236	398	52.2633	57.29	37.19	62.31
CBU_0237	114	46.7867	54.39	38.6	47.37
CBU_0238	218	47.2467	56.88	43.58	41.28
CBU_0239	207	46.0567	56.04	43.48	38.65
CBU_0240	96	41.6633	53.12	40.62	31.25
CBU_0241	276	50	57.61	48.91	43.48
CBU_0242	96	47.2233	54.17	39.58	47.92
CBU_0243	116	48.85	59.48	39.66	47.41
CBU_0244	228	48.3933	59.65	40.35	45.18
CBU_0245	138	49.76	58.7	46.38	44.2
CBU_0246	66	42.4267	57.58	28.79	40.91
CBU_0247	84	42.0633	46.43	36.9	42.86
CBU_0248	123	43.6333	53.66	34.96	42.28
CBU_0249	108	40.1233	52.78	29.63	37.96
CBU_0250	183	42.6233	51.91	39.89	36.07
CBU_0251	100	46.3333	52	45	42
CBU_0252	134	42.29	52.99	35.82	38.06
CBU_0253	179	47.1133	57.54	40.22	43.58
CBU_0254	118	47.46	61.02	44.07	37.29
CBU_0255	169	49.7033	59.17	45.56	44.38
CBU_0256	64	46.8733	57.81	32.81	50
CBU_0257	144	50.46	61.11	44.44	45.83
CBU_0258	443	44.3933	46.73	38.37	48.08
CBU_0259	32	35.42	34.38	37.5	34.38
CBU_0260	120	48.8867	60.83	47.5	38.33
CBU_0261	124	49.19	58.06	51.61	37.9
CBU_0262	207	42.9933	57	37.2	34.78
CBU_0263	328	44	55.79	37.8	38.41
CBU_0264	127	46.72	58.27	40.16	41.73
CBU_0265	409	40.6667	43.03	34.47	44.5
CBU_0266	430	36.5867	36.74	36.74	36.28
CBU_0270	407	45.4533	52.58	42.26	41.52
CBU_0271	159	45.07	51.57	44.65	38.99
CBU_0272	459	43.1367	49.24	37.25	42.92
CBU_0273	249	43.7767	49.4	38.96	42.97
CBU_0274	955	45.4433	54.97	40.52	40.84
CBU_0274a	55	47.88	49.09	40	54.55
CBU_0275	362	47.6067	54.14	42.27	46.41
CBU_0276	360	47.2233	52.78	40.56	48.33
CBU_0277	51	57.5167	64.71	54.9	52.94
CBU_0278	198	40.74	44.95	34.85	42.42
CBU_0279	276	40.94	51.45	31.88	39.49
CBU_0280	373	42.36	49.33	37.27	40.48
CBU_0281	182	44.5033	57.69	36.26	39.56
CBU_0282	171	40.1533	49.12	30.99	40.35
CBU_0283	58	40.8033	44.83	31.03	46.55
CBU_0284	76	40.35	46.05	36.84	38.16
CBU_0285	107	40.81	44.86	34.58	42.99
CBU_0286	440	43.94	52.73	37.27	41.82
CBU_0287	187	48.6633	59.36	41.71	44.92
CBU_0288	160	43.33	55.62	36.25	38.12
CBU_0289	82	39.0267	48.78	31.71	36.59
CBU_0290	71	38.97	35.21	40.85	40.85
CBU_0291	80	43.3333	46.25	37.5	46.25
CBU_0291b	119	48.46	47.9	46.22	51.26
CBU_0292	220	53.4833	51.36	45	64.09
CBU_0292	220	53.4833	51.36	45	64.09
CBU_0293	162	47.3267	55.56	45.06	41.36
CBU_0294	472	45.3367	53.81	38.77	43.43
CBU_0295	490	38.71	47.76	32.45	35.92
CBU_0296	216	42.13	51.39	36.11	38.89
CBU_0297	260	41.7933	46.54	37.69	41.15
CBU_0298	281	46.03	51.25	40.93	45.91
CBU_0299	240	46.53	56.67	41.67	41.25
CBU_0300	288	46.76	57.99	33.68	48.61
CBU_0301	207	44.4433	56.52	34.3	42.51
CBU_0302	98	46.9367	71.43	34.69	34.69
CBU_0303	708	45.95	56.21	37.71	43.93
CBU_0304	149	41.1633	51.01	34.9	37.58
CBU_0305	705	44.2067	54.18	39.01	39.43
CBU_0307	232	47.99	52.59	49.14	42.24
CBU_0307a	82	53.66	56.1	48.78	56.1
CBU_0309	657	40.1833	52.05	30.9	37.6
CBU_0311	253	43.8733	49.41	46.64	35.57
CBU_0312	284	47.77	57.04	43.66	42.61
CBU_0312a	40	50.8333	52.5	45	55
CBU_0313	500	43.4667	48.8	39.8	41.8
CBU_0314	258	47.2867	60.08	37.98	43.8
CBU_0315	244	42.0733	45.9	38.52	41.8
CBU_0316	155	48.8167	56.77	41.29	48.39
CBU_0316a	51	46.4033	56.86	49.02	33.33
CBU_0317	237	46.27	57.38	35.44	45.99
CBU_0318	215	52.0933	54.88	51.63	49.77
CBU_0319	39	30.77	33.33	23.08	35.9
CBU_0320	1003	40.7433	48.16	35.19	38.88
CBU_0321	258	43.2833	50.39	39.15	40.31
CBU_0322	291	41.9233	49.14	34.36	42.27
CBU_0323	84	30.16	41.67	21.43	27.38
CBU_0324	549	41.8367	48.82	37.16	39.53
CBU_0326	438	43.9867	57.53	40.18	34.25
CBU_0327	1040	36.1333	37.31	37.02	34.07
CBU_0330	555	45.2233	53.33	41.26	41.08
CBU_0331	341	40.76	51.32	39	31.96
CBU_0332	68	38.7267	45.59	29.41	41.18
CBU_0333	260	45.3867	54.62	43.46	38.08
CBU_0334	480	41.46	47.92	40.42	36.04
CBU_0335	222	40.24	47.75	32.43	40.54
CBU_0336	528	48.8667	56.63	42.05	47.92
CBU_0337	104	45.8333	53.85	37.5	46.15
CBU_0338	902	42.4967	50.22	36.03	41.24
CBU_0339	254	38.06	42.13	37.8	34.25
CBU_0340	313	44.41	52.08	32.27	48.88
CBU_0341	333	46.4467	56.16	41.14	42.04
CBU_0342	39	35.9	35.9	35.9	35.9
CBU_0343	294	41.0433	42.18	36.73	44.22
CBU_0344	179	43.55	44.69	46.63	39.33
CBU_0344a	400	42.3333	53.5	35	38.5
CBU_0346	495	47.0033	53.13	43.84	44.04
CBU_0347	464	44.3967	45.91	41.16	46.12
CBU_0349	228	45.1767	54.39	42.54	38.6
CBU_0350	235	41.1333	50.21	32.34	40.85
CBU_0351	118	42.3733	53.39	32.2	41.53
CBU_0352	298	46.9833	55.37	38.26	47.32
CBU_0353	339	43.3633	54.87	33.04	42.18
CBU_0354	526	44.3633	47.15	43.35	42.59
CBU_0355	628	41.4233	42.83	37.26	44.18
CBU_0357	76	50.8767	59.21	46.05	47.37
CBU_0358	382	40.9067	41.88	41.73	39.11
CBU_0360	431	38.47	39.21	33.64	42.56
CBU_0362	402	41.46	47.76	36.32	40.3
CBU_0363	311	45.7567	45.34	51.61	40.32
CBU_0364	444	46.2467	52.93	41.67	44.14
CBU_0365	31	45.1633	61.29	25.81	48.39
CBU_0366	253	42.03	50.99	34.39	40.71
CBU_0367	249	37.4833	47.39	31.33	33.73
CBU_0368	395	43.3733	51.9	39.49	38.73
CBU_0369	35	50.4767	62.86	37.14	51.43
CBU_0370	76	53.51	60.53	60.53	39.47
CBU_0371	398	40.0333	41.46	35.68	42.96
CBU_0372	455	40.2167	47.91	36.7	36.04
CBU_0373	175	40	48	36.57	35.43
CBU_0374	289	36.3833	36.68	30.8	41.67
CBU_0375	241	40.5267	46.06	39.42	36.1
CBU_0377	74	43.6933	50	39.19	41.89
CBU_0378	141	42.08	45.39	43.97	36.88
CBU_0379	258	41.0867	51.16	34.5	37.6
CBU_0380	42	26.19	28.57	26.19	23.81
CBU_0381	188	38.83	54.26	33.51	28.72
CBU_0382	333	46.75	58.26	36.34	45.65
CBU_0383	213	39.2767	41.78	32.39	43.66
CBU_0384	365	48.49	53.42	40	52.05
CBU_0384a	91	43.22	47.25	37.36	45.05
CBU_0384b	62	45.6967	51.61	50	35.48
CBU_0385	118	46.3267	59.32	32.2	47.46
CBU_0386	91	50.1833	58.24	43.96	48.35
CBU_0387	340	48.04	58.82	41.18	44.12
CBU_0388	1393	36.95	46.45	30.8	33.6
CBU_0389	91	45.7867	56.04	43.96	37.36
CBU_0390	516	49.29	53.49	42.05	52.33
CBU_0391	346	43.93	53.76	38.15	39.88
CBU_0392	576	40.71	40.45	36.11	45.57
CBU_0394	40	44.1667	40	42.5	50
CBU_0395	229	44.6867	54.15	37.55	42.36
CBU_0396	937	45.7133	55.07	39.27	42.8
CBU_0397	166	37.1467	36.75	36.14	38.55
CBU_0398	183	41.7133	43.72	42.08	39.34
CBU_0400	160	43.75	46.25	48.75	36.25
CBU_0400a	50	44.6667	56	36	42
CBU_0402	36	29.6333	30.56	27.78	30.56
CBU_0403	46	39.8533	50	30.43	39.13
CBU_0404	463	38.47	44.49	35.21	35.71
CBU_0407	34	26.47	23.53	26.47	29.41
CBU_0407a	166	40.7633	41.57	38.55	42.17
CBU_0409	52	32.6933	42.31	26.92	28.85
CBU_0410	579	39.2633	42.14	40.93	34.72
CBU_0412	137	44.77	51.09	39.42	43.8
CBU_0413	417	36.0067	35.97	29.74	42.31
CBU_0415	169	47.9267	49.7	44.38	49.7
CBU_0416	61	54.1	59.02	52.46	50.82
CBU_0417	46	55.0733	54.35	47.83	63.04
CBU_0417	46	55.0733	54.35	47.83	63.04
CBU_0418	282	36.88	42.55	35.11	32.98
CBU_0419	277	38.51	45.13	32.85	37.55
CBU_0420	586	40.4267	49.32	36.75	35.21
CBU_0422	112	37.7933	48.21	29.46	35.71
CBU_0423	258	39.5333	50	31.78	36.82
CBU_0424	267	42.6967	49.44	38.2	40.45
CBU_0425	456	40.2767	46.93	36.62	37.28
CBU_0426	647	44.5133	46.83	41.42	45.29
CBU_0426a	29	44.8267	55.17	34.48	44.83
CBU_0426b	319	46.81	55.17	38.87	46.39
CBU_0429	132	49.7467	59.85	42.42	46.97
CBU_0430	499	43.2867	55.31	34.07	40.48
CBU_0431	259	42.9867	50.58	35.91	42.47
CBU_0432	429	48.64	49.88	44.76	51.28
CBU_0433	174	43.2967	43.68	36.21	50
CBU_0434	40	50	50	45	55
CBU_0434a	73	47.49	54.79	38.36	49.32
CBU_0435	198	40.74	46.97	41.41	33.84
CBU_0436	259	37.0633	42.47	33.2	35.52
CBU_0437	197	37.6767	44.16	34.18	34.69
CBU_0439	45	31.85	40	31.11	24.44
CBU_0440	66	40.4033	56.06	28.79	36.36
CBU_0441	172	48.0633	54.07	41.86	48.26
CBU_0442	116	47.99	61.21	36.21	46.55
CBU_0443	247	49.3933	60.73	41.7	45.75
CBU_0444	169	44.97	55.03	32.54	47.34
CBU_0445	182	47.9867	61.54	40.11	42.31
CBU_0446	237	35.3033	46.84	35.44	23.63
CBU_0447	185	44.6833	60	34.59	39.46
CBU_0448	32	38.5433	37.5	31.25	46.88
CBU_0449	332	43.0567	46.99	45.32	36.86
CBU_0450	462	45.8167	56.49	33.77	47.19
CBU_0451	183	43.9	49.18	36.07	46.45
CBU_0452	418	42.1067	51.67	32.78	41.87
CBU_0453	187	45.2733	51.87	45.45	38.5
CBU_0454	232	46.8367	60.34	39.22	40.95
CBU_0455	122	42.0767	50	30.33	45.9
CBU_0456	118	47.1733	55.08	59.32	27.12
CBU_0457	40	40	40	42.5	37.5
CBU_0458	134	44.5267	46.27	44.03	43.28
CBU_0459	407	43.2433	45.45	36.12	48.16
CBU_0460	259	43.8867	48.26	38.61	44.79
CBU_0461	885	44.22	54.92	36.5	41.24
CBU_0462	437	42.03	55.15	34.78	36.16
CBU_0463	475	44.9133	54.32	37.05	43.37
CBU_0463a	129	40.57	48.84	34.11	38.76
CBU_0465	32	36.4567	53.12	18.75	37.5
CBU_0467	283	46.5233	57.24	36.75	45.58
CBU_0468	83	42.57	56.63	30.12	40.96
CBU_0469	68	47.0567	58.82	27.94	54.41
CBU_0470	219	45.3567	57.99	36.53	41.55
CBU_0471	495	39.78	42.22	45.34	31.78
CBU_0472	602	43.19	53.16	37.04	39.37
CBU_0473	130	42.3067	45.38	43.08	38.46
CBU_0474	83	39.76	45.78	42.17	31.33
CBU_0476	581	41.25	51.29	36.83	35.63
CBU_0477	93	42.2933	43.01	38.71	45.16
CBU_0478	33	46.4633	42.42	45.45	51.52
CBU_0478a	57	38.01	45.61	33.33	35.09
CBU_0479	254	45.4067	59.06	38.58	38.58
CBU_0480	160	41.6667	47.5	35.62	41.88
CBU_0481	251	44.89	55.38	35.86	43.43
CBU_0482	270	41.73	47.78	39.26	38.15
CBU_0483	222	41.7433	47.3	39.64	38.29
CBU_0484	224	36.7567	40.18	37.05	33.04
CBU_0485	539	43.29	48.79	40.45	40.63
CBU_0486	721	50.44	60.06	43.55	47.71
CBU_0487	309	50.0533	60.19	38.51	51.46
CBU_0488	236	43.7867	54.66	34.75	41.95
CBU_0489	345	41.3533	46.09	36.81	41.16
CBU_0490	595	41.7933	51.43	34.12	39.83
CBU_0491	65	49.74	55.38	47.69	46.15
CBU_0492	344	42.1533	53.78	36.05	36.63
CBU_0493	320	44.8967	55	40	39.69
CBU_0494	314	50.7433	61.15	39.17	51.91
CBU_0495	250	50.4	56	44	51.2
CBU_0496	85	42.35	58.82	31.76	36.47
CBU_0497	415	49.8	55.42	46.75	47.23
CBU_0498	371	44.1133	49.33	38.81	44.2
CBU_0499	162	46.9133	58.64	41.36	40.74
CBU_0500	320	41.7667	51.56	35.62	38.12
CBU_0501	42	42.8567	52.38	35.71	40.48
CBU_0502	256	41.1433	56.25	33.2	33.98
CBU_0503	360	50.9267	60.28	46.11	46.39
CBU_0504	493	43.2733	47.87	37.12	44.83
CBU_0505	206	42.72	48.54	33.5	46.12
CBU_0505a	37	26.1233	29.73	24.32	24.32
CBU_0506	575	44.8133	58.09	37.39	38.96
CBU_0507	347	42.7433	53.6	32.56	42.07
CBU_0508	238	38.6533	47.48	34.03	34.45
CBU_0509	115	40.29	47.83	34.78	38.26
CBU_0510	101	37.62	47.52	29.7	35.64
CBU_0510a	40	50	52.5	45	52.5
CBU_0511	427	42.1467	40.52	42.02	43.9
CBU_0512	346	40.6	43.35	36.13	42.32
CBU_0513	383	44.3867	56.66	40.73	35.77
CBU_0514	264	36.6167	42.05	34.47	33.33
CBU_0514a	37	45.9433	54.05	32.43	51.35
CBU_0515	440	42.1967	44.55	42.27	39.77
CBU_0516	39	46.1533	56.41	38.46	43.59
CBU_0516a	119	40.6167	43.7	46.22	31.93
CBU_0517	424	46.7767	54.48	39.15	46.7
CBU_0518	673	43.5367	55.13	35.51	39.97
CBU_0519	203	41.0533	44.83	35.47	42.86
CBU_0520	300	46.4433	55	41.33	43
CBU_0521	485	46.2567	56.7	37.53	44.54
CBU_0522	57	41.52	49.12	31.58	43.86
CBU_0522a	91	43.22	47.25	37.36	45.05
CBU_0523	365	48.49	53.42	40	52.05
CBU_0524	851	45.1633	57.81	37.49	40.19
CBU_0525	361	42.1067	50.97	37.4	37.95
CBU_0526	439	46.9233	56.26	43.28	41.23
CBU_0527	238	48.46	57.56	42.86	44.96
CBU_0528	556	45.56	59.35	33.27	44.06
CBU_0529	97	36.08	43.3	26.8	38.14
CBU_0530	390	43.8467	55.9	36.15	39.49
CBU_0531	237	43.5967	53.16	40.08	37.55
CBU_0532	124	39.7833	45.16	36.29	37.9
CBU_0533	356	40.45	43.26	34.55	43.54
CBU_0534	399	37.01	49.87	26.57	34.59
CBU_0535	324	49.69	59.57	44.75	44.75
CBU_0536	41	58.5367	68.29	46.34	60.98
CBU_0537	58	48.2767	50	46.55	48.28
CBU_0538	31	54.8367	54.84	58.06	51.61
CBU_0539	536	43.6567	47.39	36.01	47.57
CBU_0540	1170	43.96	58.21	34.7	38.97
CBU_0541	231	43.1433	58.44	35.06	35.93
CBU_0542	674	43.67	55.79	37.39	37.83
CBU_0543	952	37.43	44.75	34.66	32.88
CBU_0544	94	45.0333	41.49	42.55	51.06
CBU_0545	216	35.1867	44.91	26.85	33.8
CBU_0546	349	42.7867	50.14	37.82	40.4
CBU_0547	562	39.9733	54.09	29.89	35.94
CBU_0548	335	41.5933	49.55	34.63	40.6
CBU_0549	383	40.9033	45.95	37.6	39.16
CBU_0550	616	46.8633	53.41	36.04	51.14
CBU_0551	156	48.3967	54.49	42.31	48.39
CBU_0552	117	48.15	58.12	34.19	52.14
CBU_0554	365	48.49	53.42	40	52.05
CBU_0554a	91	43.22	47.25	37.36	45.05
CBU_0555	68	50.49	51.47	51.47	48.53
CBU_0556	223	41.7	52.91	35.87	36.32
CBU_0557	340	44.4133	54.71	36.47	42.06
CBU_0558	184	45.65	48.91	45.11	42.93
CBU_0559	821	43.89	52.5	36.66	42.51
CBU_0560	411	41.85	49.39	34.55	41.61
CBU_0560a	164	34.96	40.85	35.98	28.05
CBU_0562	427	31.77	40.98	29.51	24.82
CBU_0562a	141	41.37	41.84	44.68	37.59
CBU_0563	72	37.4967	45.83	33.33	33.33
CBU_0564	486	42.3867	48.15	39.3	39.71
CBU_0565	284	42.4867	54.58	30.63	42.25
CBU_0566	422	47.63	49.05	42.89	50.95
CBU_0567	153	40.3033	53.59	30.72	36.6
CBU_0568	324	42.9	54.32	35.8	38.58
CBU_0569	440	46.1367	55.45	38.64	44.32
CBU_0570	561	44.4433	44.56	41.35	47.42
CBU_0571	142	38.0267	44.37	32.39	37.32
CBU_0572	459	49.2367	57.08	41.39	49.24
CBU_0573	716	43.7133	52.65	41.34	37.15
CBU_0574	432	48.6867	57.87	42.59	45.6
CBU_0576	684	44.4967	53.95	38.6	40.94
CBU_0577	259	36.4233	40.93	35.52	32.82
CBU_0578	325	40.5133	48	36.62	36.92
CBU_0579	498	41.03	45.78	38.76	38.55
CBU_0580	274	42.2133	50.36	36.5	39.78
CBU_0581	112	45.83	60.71	34.82	41.96
CBU_0582	80	44.5833	53.75	41.25	38.75
CBU_0583	100	41.6667	52	34	39
CBU_0584	106	50	54.72	52.83	42.45
CBU_0585	68	42.6467	47.06	36.76	44.12
CBU_0586	1172	48.92	57.34	39.85	49.57
CBU_0587	108	43.8267	52.78	28.7	50
CBU_0588	332	48.4967	53.92	42.47	49.1
CBU_0589	133	43.8567	49.62	40.6	41.35
CBU_0590	58	62.6433	65.52	58.62	63.79
CBU_0590	58	62.6433	65.52	58.62	63.79
CBU_0591	275	41.4533	47.27	38.91	38.18
CBU_0592	106	31.1333	29.25	27.36	36.79
CBU_0593	384	38.5233	36.2	38.9	40.47
CBU_0596	250	39.2	48.8	33.2	35.6
CBU_0596a	80	50.8333	46.25	51.25	55
CBU_0597	376	44.15	50.8	35.37	46.28
CBU_0598	188	47.1633	57.45	36.7	47.34
CBU_0599	272	45.7133	54.41	38.24	44.49
CBU_0600	534	39.6667	39.14	37.83	42.03
CBU_0603	371	34.77	33.96	36.93	33.42
CBU_0605	391	37.9367	42.2	33.25	38.36
CBU_0607	504	43.1233	48.61	40.28	40.48
CBU_0608	314	44.6933	50.64	42.36	41.08
CBU_0609	341	43.01	51.61	36.36	41.06
CBU_0610	358	49.35	56.15	41.9	50
CBU_0611	804	44.4033	50	39.55	43.66
CBU_0612	166	39.1567	51.81	30.12	35.54
CBU_0613	343	49.1733	53.94	45.48	48.1
CBU_0614	146	38.8133	51.37	29.45	35.62
CBU_0615	260	45.2567	53.08	41.15	41.54
CBU_0616	197	38.41	44.16	32.49	38.58
CBU_0617	506	38.4733	45.65	33.6	36.17
CBU_0618	365	40.9133	43.56	38.36	40.82
CBU_0619	163	41.5167	46.63	43.56	34.36
CBU_0620	377	42.3533	53.32	32.89	40.85
CBU_0621	328	47.1567	57.32	35.98	48.17
CBU_0622	149	51.4533	61.07	40.27	53.02
CBU_0623	41	40.6467	43.9	39.02	39.02
CBU_0624	45	35.5567	37.78	33.33	35.56
CBU_0625	136	39.2133	49.26	35.29	33.09
CBU_0626	696	37.4533	45.69	32.04	34.63
CBU_0627	41	45.5267	43.9	53.66	39.02
CBU_0628	176	40.34	53.98	34.09	32.95
CBU_0629	1047	44.03	54.15	38.3	39.64
CBU_0630	231	43	48.92	37.66	42.42
CBU_0631	1325	45.26	54.42	41.13	40.23
CBU_0632	100	44.6667	64	28	42
CBU_0634	631	37.2433	48.81	31.7	31.22
CBU_0635	497	42.3233	49.9	40.85	36.22
CBU_0636	298	37.9167	42.95	37.58	33.22
CBU_0637	254	36.09	46.85	29.53	31.89
CBU_0638	379	48.0233	59.63	40.9	43.54
CBU_0639	327	49.7467	59.94	39.76	49.54
CBU_0640	369	48.96	58.27	41.73	46.88
CBU_0641	383	46.2133	56.92	38.38	43.34
CBU_0642	251	43.16	52.19	40.64	36.65
CBU_0643	355	40.5667	50.99	38.03	32.68
CBU_0644	113	34.22	42.48	28.32	31.86
CBU_0645	88	37.5033	51.14	29.55	31.82
CBU_0646	208	42.1467	46.63	36.54	43.27
CBU_0647	388	46.22	55.93	39.95	42.78
CBU_0648	152	46.2733	54.61	37.5	46.71
CBU_0649	364	41.0233	45.6	34.89	42.58
CBU_0650	409	38.37	37.9	38.73	38.48
CBU_0652	281	43.6533	55.87	40.21	34.88
CBU_0654	497	35.1733	33	31.59	40.93
CBU_0656	111	42.0433	52.25	27.03	46.85
CBU_0657	202	47.5267	56.44	40.1	46.04
CBU_0658	144	44.91	54.17	40.28	40.28
CBU_0659	510	45.9467	57.25	37.45	43.14
CBU_0660	55	53.9367	56.36	49.09	56.36
CBU_0661	137	43.0667	52.55	37.23	39.42
CBU_0662	39	45.2967	51.28	38.46	46.15
CBU_0663	35	46.67	54.29	34.29	51.43
CBU_0664	382	42.1467	48.17	37.96	40.31
CBU_0665	329	35.2567	44.98	31.91	28.88
CBU_0666	375	45.69	52.53	38.67	45.87
CBU_0667	272	44.4833	51.47	38.6	43.38
CBU_0668	60	36.67	41.67	31.67	36.67
CBU_0669	58	30.4567	37.93	22.41	31.03
CBU_0670	421	48.9333	58.91	42.52	45.37
CBU_0671	478	41.0733	51.46	34.94	36.82
CBU_0672	539	38.28	48.05	34.32	32.47
CBU_0673	182	35.8967	47.25	32.97	27.47
CBU_0674	197	42.3	51.27	38.07	37.56
CBU_0675	248	42.7433	54.44	37.1	36.69
CBU_0676	338	38.1667	48.22	35.21	31.07
CBU_0677	346	43.5467	53.76	41.33	35.55
CBU_0678	527	41.6167	52.75	36.24	35.86
CBU_0679	315	41.5867	50.79	34.29	39.68
CBU_0680	437	43.5567	53.78	37.53	39.36
CBU_0681	302	42.9367	57.62	35.76	35.43
CBU_0682	218	42.5067	57.34	35.78	34.4
CBU_0683	421	34.1267	46.32	29.93	26.13
CBU_0684	473	31.36	39.11	30.87	24.1
CBU_0685	1113	38.2133	46.63	35.4	32.61
CBU_0686	237	44.16	50.63	44.3	37.55
CBU_0687	548	34.1867	37.96	35.22	29.38
CBU_0688	333	38.64	49.25	35.74	30.93
CBU_0689	349	36.1967	50.14	34.38	24.07
CBU_0690	286	36.0133	40.56	38.11	29.37
CBU_0691	413	38.2567	48.91	35.59	30.27
CBU_0692	354	43.7867	49.44	42.37	39.55
CBU_0693	350	44.0967	54	38	40.29
CBU_0694	371	39.62	44.74	35.04	39.08
CBU_0695	459	32.46	37.91	30.28	29.19
CBU_0696	385	40.35	53.77	33.51	33.77
CBU_0697	387	40.05	47.8	35.92	36.43
CBU_0698	390	42.48	46.67	36.67	44.1
CBU_0699	520	32.6267	40.19	30.19	27.5
CBU_0700	586	40.6133	50.85	37.2	33.79
CBU_0701	278	38.6067	44.96	35.25	35.61
CBU_0702	250	42.9333	50.8	38.4	39.6
CBU_0703	288	35.4167	39.24	35.07	31.94
CBU_0704	259	35.7767	44.4	34.36	28.57
CBU_0705	110	37.2733	40	30	41.82
CBU_0706	237	35.8667	43.88	29.54	34.18
CBU_0707	97	45.7033	48.45	42.27	46.39
CBU_0707a	134	33.83	43.28	30.6	27.61
CBU_0709	278	37.1033	38.13	30.94	42.24
CBU_0711	48	36.8067	35.42	33.33	41.67
CBU_0712	212	41.1967	51.42	32.08	40.09
CBU_0713	417	45.0067	50.84	41.01	43.17
CBU_0714	137	47.69	60.58	34.31	48.18
CBU_0715	331	39.1733	47.73	37.16	32.63
CBU_0716	307	40.5	52.12	34.53	34.85
CBU_0716a	557	47.3067	42.73	50.81	48.38
CBU_0718	95	40	38.95	41.05	40
CBU_0719	142	35.9133	43.66	32.39	31.69
CBU_0720	294	44.1067	55.1	39.46	37.76
CBU_0721	354	44.8233	52.54	38.14	43.79
CBU_0722	401	44.72	54.36	36.41	43.39
CBU_0724	331	39.1733	47.73	37.16	32.63
CBU_0724a	352	38.6167	36.93	39.6	39.32
CBU_0724c	22	42.4233	45.45	27.27	54.55
CBU_0727	378	41.5333	50	38.36	36.24
CBU_0728	270	44.0733	53.7	38.15	40.37
CBU_0729	309	43.15	48.22	38.51	42.72
CBU_0730	200	42.5	47	39.5	41
CBU_0731	157	42.25	38.85	43.31	44.59
CBU_0732	309	33.4767	38.51	27.83	34.09
CBU_0734	75	52.8867	57.33	56	45.33
CBU_0735	283	45.7033	55.48	39.93	41.7
CBU_0736	218	46.33	45.41	44.04	49.54
CBU_0737	443	47.4767	61.85	32.05	48.53
CBU_0738	196	45.7467	56.12	35.71	45.41
CBU_0739	423	41.29	53.19	35.46	35.22
CBU_0740	818	44.3367	57.7	35.21	40.1
CBU_0741	441	42.2533	49.21	39	38.55
CBU_0742	49	57.8233	63.27	53.06	57.14
CBU_0743	90	44.4433	50	32.22	51.11
CBU_0744	193	41.9667	54.4	31.09	40.41
CBU_0745	97	38.49	48.45	27.84	39.18
CBU_0746	250	44	53.6	36.8	41.6
CBU_0747	143	45.6867	51.05	37.76	48.25
CBU_0748	196	46.94	48.98	41.33	50.51
CBU_0749	166	49.1967	62.65	37.35	47.59
CBU_0750	325	51.0767	56.31	42.15	54.77
CBU_0751	435	49.0433	58.16	41.15	47.82
CBU_0752	314	36.3067	43.31	29.62	35.99
CBU_0752a	61	50.2733	54.1	44.26	52.46
CBU_0753	1023	43.0133	49.66	35.68	43.7
CBU_0754	349	42.5033	52.44	35.24	39.83
CBU_0755	452	47.42	57.08	37.39	47.79
CBU_0756	213	51.1733	63.85	42.25	47.42
CBU_0757	328	50.9167	62.2	39.94	50.61
CBU_0758	273	44.2	52.75	41.39	38.46
CBU_0759	316	39.5033	38.61	31.01	48.89
CBU_0760	125	35.4667	39.2	32.8	34.4
CBU_0761	37	49.55	56.76	48.65	43.24
CBU_0762	209	40.8267	52.63	36.36	33.49
CBU_0763	197	40.6133	45.69	35.03	41.12
CBU_0764	812	42.1367	46.06	38.55	41.8
CBU_0765	555	40.41	38.92	46.39	35.92
CBU_0766	651	41.78	48.54	38.4	38.4
CBU_0767	44	39.3967	59.09	29.55	29.55
CBU_0768	512	39.52	44.73	37.11	36.72
CBU_0769	229	39.5933	48.91	31.88	37.99
CBU_0770	422	37.9933	45.5	34.12	34.36
CBU_0771	291	45.8167	58.76	37.8	40.89
CBU_0772	373	42.8967	50.94	41.02	36.73
CBU_0773	157	44.16	51.59	39.49	41.4
CBU_0774	83	44.1767	49.4	33.73	49.4
CBU_0775	114	39.1833	50.88	28.95	37.72
CBU_0776	284	39.3167	48.94	26.76	42.25
CBU_0777	305	41.7467	45.9	37.7	41.64
CBU_0777c	133	40.35	44.36	33.83	42.86
CBU_0778	173	39.77	42.77	35.26	41.28
CBU_0780	217	45.7733	57.14	34.56	45.62
CBU_0781	339	39.3333	46.61	36.58	34.81
CBU_0782	463	37.51	41.9	34.34	36.29
CBU_0783	330	37.75	39.7	34.95	38.6
CBU_0784	36	48.1467	52.78	44.44	47.22
CBU_0786	391	42.1167	52.69	38.11	35.55
CBU_0787	515	38.7033	50.87	33.98	31.26
CBU_0788	1613	39.7367	48.23	37.69	33.29
CBU_0789	832	40.7867	50.36	34.74	37.26
CBU_0790	1063	43.1933	45.53	37.82	46.23
CBU_0792	463	38.66	40.17	39.52	36.29
CBU_0793	205	40.6533	47.32	40.49	34.15
CBU_0794	465	36.63	40.43	36.99	32.47
CBU_0795	189	44.7933	50.79	33.33	50.26
CBU_0796	114	50.2933	64.04	35.09	51.75
CBU_0797	527	40.1667	41.37	37.76	41.37
CBU_0798	332	45.18	54.82	37.65	43.07
CBU_0799	42	34.1267	40.48	35.71	26.19
CBU_0800	138	42.27	50.72	32.61	43.48
CBU_0801	146	39.04	51.37	32.19	33.56
CBU_0802	269	42.13	53.53	34.94	37.92
CBU_0803	352	48.8633	57.67	37.5	51.42
CBU_0804	1013	43.4033	50.05	38.4	41.76
CBU_0805	37	42.3433	40.54	48.65	37.84
CBU_0806	36	41.6667	55.56	36.11	33.33
CBU_0807	380	44.21	52.11	37.89	42.63
CBU_0808	921	44.4467	53.75	37.35	42.24
CBU_0809	373	44.59	49.06	37.53	47.18
CBU_0810	356	44.1033	50	36.8	45.51
CBU_0811	526	42.5833	52.66	37.26	37.83
CBU_0812	453	41.3533	47.68	36.2	40.18
CBU_0813	153	31.3733	41.18	29.41	23.53
CBU_0814	618	42.0167	44.5	37.54	44.01
CBU_0817	201	33.0033	39.3	26.87	32.84
CBU_0818	194	42.9567	50.52	29.38	48.97
CBU_0819	225	40	48.89	36	35.11
CBU_0820	444	38.6167	43.02	34.91	37.92
CBU_0822	379	41.7767	48.55	37.2	39.58
CBU_0823	566	43.9933	52.47	37.81	41.7
CBU_0824	462	41.0533	50.65	35.28	37.23
CBU_0825	370	47.6567	54.32	40.54	48.11
CBU_0826	168	42.46	52.98	39.88	34.52
CBU_0827	199	40.37	53.77	33.17	34.17
CBU_0828	518	42.2133	53.86	36.68	36.1
CBU_0829	332	41.87	54.22	39.76	31.63
CBU_0830	385	43.81	54.29	41.3	35.84
CBU_0831	633	37.9167	48.34	33.02	32.39
CBU_0832	184	40.3967	47.28	39.67	34.24
CBU_0833	602	32.5033	41.53	28.74	27.24
CBU_0834	329	35.1567	44.38	33.13	27.96
CBU_0835	90	37.04	46.67	28.89	35.56
CBU_0836	359	36.0267	43.73	35.38	28.97
CBU_0837	495	30.64	35.35	27.68	28.89
CBU_0838	367	35.7867	46.32	34.06	26.98
CBU_0839	431	37.9733	48.26	34.8	30.86
CBU_0840	638	41.2733	48.28	39.18	36.36
CBU_0841	378	38.9733	51.32	35.71	29.89
CBU_0842	366	35.1567	45.63	32.79	27.05
CBU_0843	386	34.11	41.97	30.57	29.79
CBU_0844	340	39.3167	50	34.71	33.24
CBU_0845	430	45.1167	55.81	36.05	43.49
CBU_0846	450	41.1133	51.56	36.22	35.56
CBU_0847	255	47.32	58.43	43.14	40.39
CBU_0848	548	41.12	46.53	36.68	40.15
CBU_0849	296	47.41	56.76	36.82	48.65
CBU_0850	298	39.3767	41.95	34.23	41.95
CBU_0851	90	45.1833	54.44	33.33	47.78
CBU_0852	697	47.25	60.83	38.88	42.04
CBU_0853	159	44.4433	54.09	33.33	45.91
CBU_0854	37	46.85	56.76	35.14	48.65
CBU_0855	770	46.1933	50.13	44.16	44.29
CBU_0856	597	43.89	49.25	37.86	44.56
CBU_0857	326	41.1033	54.6	34.97	33.74
CBU_0858	543	41.2533	53.59	36.1	34.07
CBU_0859	124	45.9667	54.84	44.35	38.71
CBU_0860	154	37.8767	46.75	29.87	37.01
CBU_0861	614	45.0067	54.4	38.6	42.02
CBU_0863	37	42.3433	40.54	45.95	40.54
CBU_0864	128	44.27	55.47	32.81	44.53
CBU_0865	74	44.1467	48.65	37.84	45.95
CBU_0866	300	44.5567	48.33	36.67	48.67
CBU_0867	155	46.0233	60	36.13	41.94
CBU_0868	611	47.0833	58.27	40.26	42.72
CBU_0869	365	40.9133	45.21	40.27	37.26
CBU_0870	83	35.34	45.78	30.12	30.12
CBU_0871	152	36.1133	40.13	35.76	32.45
CBU_0872	216	43.98	54.17	33.33	44.44
CBU_0873	200	44.3333	57	38	38
CBU_0874	353	47.4033	58.36	43.91	39.94
CBU_0875	341	45.2567	58.94	38.71	38.12
CBU_0876	369	41.9167	50.68	38.48	36.59
CBU_0877	39	31.6233	33.33	25.64	35.9
CBU_0878	322	40.7633	43.48	45.48	33.33
CBU_0880	462	33.91	41.99	30.09	29.65
CBU_0881	222	34.6833	47.3	24.77	31.98
CBU_0881a	236	37.8533	45.76	36.44	31.36
CBU_0883	45	37.78	37.78	37.78	37.78
CBU_0884	603	46.8233	57.05	37.81	45.61
CBU_0885	389	37.1033	48.84	32.39	30.08
CBU_0886	392	45.92	52.3	41.33	44.13
CBU_0886a	370	42.5033	44.86	41.19	41.46
CBU_0888	148	41.44	43.24	38.51	42.57
CBU_0889	200	45	50	42	43
CBU_0890	234	44.3033	52.14	35.04	45.73
CBU_0891	313	46.3267	57.51	39.94	41.53
CBU_0892	262	49.2367	59.16	42.37	46.18
CBU_0893	292	46.69	55.82	41.44	42.81
CBU_0894	417	43.4867	53	37.41	40.05
CBU_0895	206	45.63	54.37	36.89	45.63
CBU_0896	185	39.2767	43.24	32.97	41.62
CBU_0897	507	45.0367	56.21	38.86	40.04
CBU_0898	111	38.44	38.74	40.54	36.04
CBU_0899	150	38.8233	46	41.61	28.86
CBU_0900	55	24.85	23.64	27.27	23.64
CBU_0901	1228	41.2833	37.38	46.62	39.85
CBU_0904	354	47.27	55.65	40.96	45.2
CBU_0905	80	48.75	50	42.5	53.75
CBU_0906	433	42.2633	45.27	40.18	41.34
CBU_0907	193	42.8333	55.96	34.2	38.34
CBU_0908	182	36.08	37.91	30.22	40.11
CBU_0909	205	49.43	59.51	42.93	45.85
CBU_0910	325	43.4867	51.38	36.31	42.77
CBU_0911	48	47.9167	50	52.08	41.67
CBU_0912	475	44	55.16	36.42	40.42
CBU_0913	158	45.57	53.16	40.51	43.04
CBU_0914	372	38.89	41.67	42.47	32.53
CBU_0915	170	35.4933	38.24	37.65	30.59
CBU_0916	256	41.2767	52.34	34.77	36.72
CBU_0917	402	35.19	33.58	29.85	42.14
CBU_0918	590	32.0333	43.9	26.95	25.25
CBU_0919	382	41.4333	44.24	39.9	40.16
CBU_0920	372	44.0867	51.88	38.98	41.4
CBU_0921	105	43.81	43.81	38.1	49.52
CBU_0922	438	43.9867	48.17	40.64	43.15
CBU_0923	377	36.9567	42.97	31.03	36.87
CBU_0924	223	45.59	54.26	35.87	46.64
CBU_0925	334	46.1067	51.2	42.81	44.31
CBU_0926	298	44.8533	53.02	40.6	40.94
CBU_0927	499	46.6267	55.91	40.88	43.09
CBU_0928	197	43.3167	56.85	37.06	36.04
CBU_0929	282	41.25	44.68	37.23	41.84
CBU_0930	227	39.2067	46.26	36.12	35.24
CBU_0931	501	41.3167	49.5	38.32	36.13
CBU_0932	515	46.02	55.53	42.72	39.81
CBU_0933	258	37.4667	38.76	34.11	39.53
CBU_0934	305	41.97	51.15	34.43	40.33
CBU_0935	130	38.2033	47.69	36.15	30.77
CBU_0936	190	43.86	50	41.05	40.53
CBU_0937	484	45.7333	49.59	44.01	43.6
CBU_0937a	172	44.7667	54.65	36.63	43.02
CBU_0939	509	38.3767	40.67	36.94	37.52
CBU_0940	355	45.6333	51.83	42.82	42.25
CBU_0941	91	46.1533	52.75	37.36	48.35
CBU_0942	128	47.3967	55.47	45.31	41.41
CBU_0943	147	41.0433	46.26	34.01	42.86
CBU_0944	34	35.29	35.29	35.29	35.29
CBU_0945	324	33.23	40.12	32.1	27.47
CBU_0946	329	40.3267	48.33	34.35	38.3
CBU_0946a	262	42.8033	51.53	34.35	42.53
CBU_0948	152	33.5533	41.45	33.55	25.66
CBU_0949	123	34.69	43.09	29.27	31.71
CBU_0950	1081	42.4267	50.32	39.59	37.37
CBU_0951	264	44.3133	37.88	52.09	42.97
CBU_0952	228	38.7433	48.25	32.02	35.96
CBU_0953	442	44.9467	49.77	45.25	39.82
CBU_0954	249	40.0267	51	37.75	31.33
CBU_0955	218	45.72	55.05	37.16	44.95
CBU_0956	221	36.95	38.91	34.84	37.1
CBU_0957	415	34.9367	43.61	30.84	30.36
CBU_0958	1312	40.1033	43.37	36.97	39.97
CBU_0959	410	37.4	40.73	36.59	34.88
CBU_0960	184	44.7467	47.83	39.13	47.28
CBU_0961	58	37.93	43.1	41.38	29.31
CBU_0962	233	42.2033	48.5	36.48	41.63
CBU_0963	175	40.9533	49.71	34.29	38.86
CBU_0964	304	39.8033	44.74	36.51	38.16
CBU_0964a	63	37.5633	34.92	33.33	44.44
CBU_0965	522	45.0167	47.89	39.27	47.89
CBU_0966	378	43.3867	44.71	40.21	45.24
CBU_0967	35	39.0467	37.14	37.14	42.86
CBU_0968	177	38.0433	44.07	32.77	37.29
CBU_0970	352	41.29	44.89	41.76	37.22
CBU_0971	348	41.7633	51.44	36.78	37.07
CBU_0972	231	41.99	51.95	34.63	39.39
CBU_0973	388	46.3933	56.96	39.69	42.53
CBU_0974	395	47.0033	55.19	43.04	42.78
CBU_0975	555	45.0467	56.4	39.46	39.28
CBU_0976	257	40.08	49.81	36.58	33.85
CBU_0977	662	40.7833	50.6	35.5	36.25
CBU_0978	156	42.7367	50.64	41.67	35.9
CBU_0979	101	51.1567	52.48	54.46	46.53
CBU_0980	93	47.31	59.14	45.16	37.63
CBU_0981	31	27.9567	29.03	29.03	25.81
CBU_0982	361	48.6633	55.68	39.89	50.42
CBU_0983	292	40.5733	42.12	36.64	42.96
CBU_0984	259	39.64	44.79	34.75	39.38
CBU_0985	253	36.7567	45.45	29.25	35.57
CBU_0986	271	44.7733	56.46	40.96	36.9
CBU_0987	266	43.11	48.5	41.73	39.1
CBU_0988	230	46.38	56.09	37.83	45.22
CBU_0989	1057	35.05	33.59	34.63	36.93
CBU_0993	171	48.93	54.97	36.26	55.56
CBU_0994	36	58.33	69.44	58.33	47.22
CBU_0995	95	40	44.21	31.58	44.21
CBU_0996	306	43.0267	44.77	39.54	44.77
CBU_0997	39	43.5933	41.03	41.03	48.72
CBU_0998	436	43.6533	52.75	40.6	37.61
CBU_0999	455	45.5667	59.12	38.02	39.56
CBU_1000	234	44.02	55.56	35.9	40.6
CBU_1001	415	45.7	48.19	38.31	50.6
CBU_1002	324	40.6367	47.84	33.95	40.12
CBU_1003	243	39.3667	48.15	33.74	36.21
CBU_1004	249	35.2067	40.16	33.33	32.13
CBU_1005	235	33.9	44.68	30.64	26.38
CBU_1006	385	40.0867	48.05	40.52	31.69
CBU_1007	322	41.0967	49.07	38.82	35.4
CBU_1008	443	41.46	50.34	35.89	38.15
CBU_1008a	105	39.3633	41.9	37.14	39.05
CBU_1010	127	39.8933	44.88	35.43	39.37
CBU_1011	395	36.2867	45.57	31.39	31.9
CBU_1012	731	32.6167	38.3	29	30.55
CBU_1013a	137	43.2033	38.69	35.77	55.15
CBU_1014	65	32.31	40	32.31	24.62
CBU_1015	182	36.81	45.05	30.22	35.16
CBU_1016	51	36.6	43.14	29.41	37.25
CBU_1017	381	36.1333	45.93	35.7	26.77
CBU_1019	73	46.5767	57.53	42.47	39.73
CBU_1020	84	44.4467	39.29	44.05	50
CBU_1021	148	38.0633	49.32	31.76	33.11
CBU_1022	100	31.3333	41	29	24
CBU_1023	319	40.3333	54.23	36.05	30.72
CBU_1023a	93	40.5	39.78	32.26	49.46
CBU_1024	816	38.4167	34.68	33.09	47.48
CBU_1027	464	41.74	51.08	39.87	34.27
CBU_1028	301	36.21	46.51	30.56	31.56
CBU_1028a	474	36.71	42.83	35.65	31.65
CBU_1031	147	44.2167	58.5	30.61	43.54
CBU_1032	293	38.1133	46.08	31.06	37.2
CBU_1034	212	47.3267	52.36	41.04	48.58
CBU_1035	469	43.9233	53.73	34.33	43.71
CBU_1035b	494	41.66	43.93	39.47	41.58
CBU_1035d	112	36.6067	33.93	32.14	43.75
CBU_1036	90	38.8867	52.22	31.11	33.33
CBU_1038	199	39.7	44.22	33.67	41.21
CBU_1039	669	43.25	46.64	36.62	46.49
CBU_1040	299	43.4767	49.5	36.45	44.48
CBU_1041	52	33.9767	34.62	30.77	36.54
CBU_1042	134	38.0567	43.28	31.34	39.55
CBU_1043	215	46.2033	56.28	34.42	47.91
CBU_1044	583	37.1333	36.54	34.65	40.21
CBU_1046	594	46.7167	49.33	40.57	50.25
CBU_1048	757	45.9067	47.56	42.14	48.02
CBU_1050	71	42.7233	59.15	28.17	40.85
CBU_1051	410	47.8867	56.83	41.71	45.12
CBU_1052	866	44.69	57.39	36.03	40.65
CBU_1053	145	43.6767	54.48	36.55	40
CBU_1054	344	46.9967	57.56	39.53	43.9
CBU_1055	167	47.3033	49.1	47.9	44.91
CBU_1056	872	43.54	54.82	36.47	39.33
CBU_1057	248	43.01	50.4	37.5	41.13
CBU_1058	429	39.4733	50.12	34.03	34.27
CBU_1059	245	47.89	61.63	39.59	42.45
CBU_1060	210	42.38	57.14	36.19	33.81
CBU_1061	276	43.3567	58.33	33.33	38.41
CBU_1061a	369	43.45	50.95	35.77	43.63
CBU_1063	469	35.11	46.06	28.78	30.49
CBU_1064	95	42.1033	45.26	35.79	45.26
CBU_1065	185	41.8033	53.51	35.68	36.22
CBU_1066	594	43.8267	51.85	38.38	41.25
CBU_1067	257	43.32	49.03	33.46	47.47
CBU_1067a	583	37.9067	40.82	33.45	39.45
CBU_1069	691	38.2033	44.86	32.27	37.48
CBU_1071	143	44.0533	46.15	39.16	46.85
CBU_1072	386	47.41	54.15	41.19	46.89
CBU_1073	169	39.4467	50.89	31.95	35.5
CBU_1074	187	46.1667	57.75	39.04	41.71
CBU_1075	384	41.4933	47.4	36.72	40.36
CBU_1075a	91	43.22	47.25	37.36	45.05
CBU_1076	365	48.58	53.42	40.27	52.05
CBU_1077	314	50	62.1	39.81	48.09
CBU_1078	113	38.35	51.33	26.55	37.17
CBU_1079	199	44.7267	55.78	33.17	45.23
CBU_1080	161	50.7233	57.14	45.34	49.69
CBU_1081	113	38.6433	48.67	30.09	37.17
CBU_1082	312	39.9567	50.64	37.82	31.41
CBU_1083	576	42.8233	56.42	37.5	34.55
CBU_1084	684	40.8367	50.58	32.46	39.47
CBU_1085	406	40.4767	50.74	38.67	32.02
CBU_1086	331	39.1733	47.73	37.16	32.63
CBU_1087	149	40.27	46.98	33.56	40.27
CBU_1088	489	50.24	62.58	44.38	43.76
CBU_1089	33	41.41	39.39	39.39	45.45
CBU_1090	365	48.49	53.42	40	52.05
CBU_1090a	91	43.22	47.25	37.36	45.05
CBU_1091	750	44.93	57.73	34.93	42.13
CBU_1092	77	49.7833	54.55	48.05	46.75
CBU_1093	1020	41.83	47.94	35.88	41.67
CBU_1094	381	44.0933	53.54	37.53	41.21
CBU_1095	188	37.7633	42.55	39.36	31.38
CBU_1096	460	44.49	50.43	38.04	45
CBU_1096a	27	39.5067	55.56	22.22	40.74
CBU_1097	266	41.6033	48.12	37.22	39.47
CBU_1098	275	35.6367	42.91	31.27	32.73
CBU_1099	260	41.0267	48.46	35	39.62
CBU_1100	143	47.32	54.55	46.15	41.26
CBU_1100a	57	42.1033	36.84	45.61	43.86
CBU_1101	294	35.1167	30.27	40.27	34.81
CBU_1103	427	48.1667	54.33	42.39	47.78
CBU_1104	331	39.1733	47.73	37.16	32.63
CBU_1105	406	35.42	35.96	31.53	38.77
CBU_1107	1052	35.6467	37.17	38.69	31.08
CBU_1111	405	38.4333	46.91	37.28	31.11
CBU_1112	122	38.25	34.43	37.7	42.62
CBU_1113	406	39.9333	47.54	33.99	38.27
CBU_1115	106	36.7933	39.62	32.08	38.68
CBU_1116	370	48.38	60.27	39.19	45.68
CBU_1117	315	46.0333	56.83	40	41.27
CBU_1118	251	43.56	55.38	34.26	41.04
CBU_1119	274	44.4033	56.57	36.86	39.78
CBU_1120	542	43.85	52.4	40.77	38.38
CBU_1121	61	33.8833	36.07	34.43	31.15
CBU_1122	254	43.5667	46.06	40.55	44.09
CBU_1123	342	43.86	58.19	41.81	31.58
CBU_1124	107	40.81	53.27	31.78	37.38
CBU_1125	473	42.5933	44.82	40.59	42.37
CBU_1127	172	43.8	52.91	38.37	40.12
CBU_1128	120	39.7233	51.67	34.17	33.33
CBU_1129	397	45.8467	55.42	42.57	39.55
CBU_1130	690	44.9733	52.61	40.72	41.59
CBU_1131	241	48.27	57.68	41.49	45.64
CBU_1132	33	39.39	36.36	36.36	45.45
CBU_1133	268	44.1533	53.73	38.43	40.3
CBU_1134	152	44.9567	51.32	46.05	37.5
CBU_1135	145	43.9067	51.03	46.9	33.79
CBU_1136	1045	37.7667	46.89	34.83	31.58
CBU_1137	185	36.9367	42.7	37.3	30.81
CBU_1138	249	42.9733	46.99	39.76	42.17
CBU_1138a	51	37.9067	47.06	29.41	37.25
CBU_1139	46	44.2033	39.13	43.48	50
CBU_1140	371	40.5	45.82	39.46	36.22
CBU_1141	305	42.5133	48.52	37.38	41.64
CBU_1142	623	46.6567	54.25	39.65	46.07
CBU_1143	117	45.87	55.56	40.17	41.88
CBU_1144	118	51.6967	52.54	44.92	57.63
CBU_1145	36	34.26	38.89	38.89	25
CBU_1146	990	39.5267	47.98	33.13	37.47
CBU_1147	372	43.9967	53.23	35.48	43.28
CBU_1148	1158	42.5733	53.8	36.96	36.96
CBU_1150	230	38.6567	42.17	38.43	35.37
CBU_1151	246	41.4633	50.81	33.74	39.84
CBU_1152	464	43.1033	52.37	37.93	39.01
CBU_1152a	457	37.5933	39.39	35.89	37.5
CBU_1154	258	38.76	53.88	35.66	26.74
CBU_1155	601	42.65	51.75	39.93	36.27
CBU_1156	268	44.7767	51.87	41.79	40.67
CBU_1157	234	46.4367	52.56	41.45	45.3
CBU_1158	456	39.9867	41.01	40.35	38.6
CBU_1159	46	39.13	32.61	41.3	43.48
CBU_1160	392	34.3533	41.07	28.32	33.67
CBU_1161	31	48.3867	48.39	38.71	58.06
CBU_1162	444	41.89	43.69	39.86	42.12
CBU_1164	567	38.8433	43.03	38.16	35.34
CBU_1168	545	36.7967	44.95	34.19	31.25
CBU_1169	152	42.1033	50.66	36.18	39.47
CBU_1170	69	40.58	42.03	30.43	49.28
CBU_1171	151	41.9433	49.67	35.76	40.4
CBU_1172	478	49.0633	46.44	42.26	58.49
CBU_1173	123	39.8367	49.59	38.21	31.71
CBU_1174	140	43.9133	50	37.86	43.88
CBU_1175	438	43.2267	48.86	40.87	39.95
CBU_1176	473	40.3133	44.4	36.58	39.96
CBU_1177	61	54.6467	52.46	55.74	55.74
CBU_1178	378	37.2133	46.83	33.86	30.95
CBU_1179	399	43.1067	43.11	40.85	45.36
CBU_1180	44	50	52.27	47.73	50
CBU_1181	393	39.1	47.84	34.35	35.11
CBU_1182	381	43.48	52.23	38.58	39.63
CBU_1183	118	48.59	54.24	43.22	48.31
CBU_1184	243	42.11	46.5	35.39	44.44
CBU_1185	610	47.32	55.9	39.67	46.39
CBU_1186	365	48.49	53.42	40	52.05
CBU_1186a	91	43.22	47.25	37.36	45.05
CBU_1186b	48	50.6933	35.42	52.08	64.58
CBU_1186b	48	50.6933	35.42	52.08	64.58
CBU_1187	216	46.45	46.76	43.52	49.07
CBU_1188	424	45.0433	58.96	36.08	40.09
CBU_1189	428	45.7167	59.35	39.72	38.08
CBU_1190	212	38.9933	41.98	37.26	37.74
CBU_1191	786	46.0967	57.12	39.95	41.22
CBU_1193	321	48.3933	58.57	40.19	46.42
CBU_1194	479	36.6767	44.26	29.44	36.33
CBU_1195	84	49.2067	57.14	41.67	48.81
CBU_1196	754	43.68	53.98	37.27	39.79
CBU_1197	67	43.7833	40.3	44.78	46.27
CBU_1198	179	42.6433	50.28	37.99	39.66
CBU_1199	33	58.5867	63.64	48.48	63.64
CBU_1199	33	58.5867	63.64	48.48	63.64
CBU_1200	429	48.0167	55.71	38.46	49.88
CBU_1201	344	44.5733	52.91	39.24	41.57
CBU_1202	284	41.55	42.25	40.85	41.55
CBU_1203	551	45.7967	54.45	40.11	42.83
CBU_1204	459	44.3	55.34	41.18	36.38
CBU_1206	460	39.6367	41.96	38.91	38.04
CBU_1207	51	47.06	52.94	45.1	43.14
CBU_1208	413	39.71	45.04	37.53	36.56
CBU_1209	514	39.1667	46.69	35.99	34.82
CBU_1210	776	41	39.18	42.14	41.68
CBU_1212a	55	45.4533	45.45	41.82	49.09
CBU_1213	658	39.5633	47.26	34.5	36.93
CBU_1214	46	39.13	41.3	32.61	43.48
CBU_1215	584	42.1467	46.92	36.64	42.88
CBU_1216a	45	34.8133	33.33	33.33	37.78
CBU_1217	498	46.3167	58.03	40.76	40.16
CBU_1217a	365	48.49	53.42	40	52.05
CBU_1219	373	36.9067	44.77	32.17	33.78
CBU_1220	241	39.8333	48.55	32.78	38.17
CBU_1221	198	43.0967	49.49	42.93	36.87
CBU_1222	298	42.95	52.68	36.24	39.93
CBU_1223	310	46.7733	53.55	40.32	46.45
CBU_1224	427	43.7933	54.8	32.08	44.5
CBU_1224a	66	42.4267	57.58	43.94	25.76
CBU_1225	303	43.8933	50.17	37.62	43.89
CBU_1226	1627	42.51	53.9	35.46	38.17
CBU_1227	233	46.6367	60.94	36.48	42.49
CBU_1228	479	45.6533	54.91	37.37	44.68
CBU_1229	863	43.6067	51.45	37.66	41.71
CBU_1230	1111	42.3633	51.49	36.45	39.15
CBU_1231	233	39.0567	44.64	38.2	34.33
CBU_1233	301	46.7333	59.14	37.87	43.19
CBU_1234	429	37.9933	46.15	29.37	38.46
CBU_1235	184	48.7333	57.07	36.41	52.72
CBU_1236	31	33.3333	51.61	22.58	25.81
CBU_1237	131	42.24	48.09	35.88	42.75
CBU_1238	85	39.9967	49.41	31.76	38.82
CBU_1239	194	45.0167	51.55	40.72	42.78
CBU_1240	340	46.7667	57.94	41.18	41.18
CBU_1241	329	47.1133	56.84	40.12	44.38
CBU_1242	409	42.4633	43.28	43.77	40.34
CBU_1243	415	46.8267	57.83	37.83	44.82
CBU_1244	512	42.2533	45.12	40.62	41.02
CBU_1245	444	45.1967	57.21	37.39	40.99
CBU_1247	207	41.7067	50.24	35.75	39.13
CBU_1248	422	46.7633	56.16	40.05	44.08
CBU_1249	204	45.75	52.94	35.78	48.53
CBU_1250	47	46.1	55.32	40.43	42.55
CBU_1251	254	44.6	48.82	42.69	42.29
CBU_1252	371	45.1933	51.21	40.97	43.4
CBU_1253	732	38.0233	45.63	34.29	34.15
CBU_1255	268	43.7833	53.36	35.45	42.54
CBU_1256	39	43.59	48.72	35.9	46.15
CBU_1257	135	41.73	48.89	36.3	40
CBU_1258	145	44.3667	54.48	36.55	42.07
CBU_1259	533	41.84	45.97	35.27	44.28
CBU_1260	249	44.3133	46.99	44.58	41.37
CBU_1261	419	44.47	51.55	40.57	41.29
CBU_1262	88	40.53	48.86	28.41	44.32
CBU_1263	129	44.7033	57.36	44.19	32.56
CBU_1264	197	40.6833	43.15	37.06	41.84
CBU_1265	243	45.68	51.03	38.27	47.74
CBU_1266	316	49.5767	58.23	40.82	49.68
CBU_1267	683	45	48.32	39.97	46.71
CBU_1268	358	42.9267	50.84	38.55	39.39
CBU_1269	164	50.8133	59.15	42.68	50.61
CBU_1269a	130	43.0733	45.38	37.69	46.15
CBU_1270	365	48.58	53.42	40.27	52.05
CBU_1271	542	44.9233	47.23	40.59	46.95
CBU_1272	39	47.8667	61.54	41.03	41.03
CBU_1273	421	47.5867	56.06	40.86	45.84
CBU_1274	161	43.8933	50.31	39.13	42.24
CBU_1275	403	44.17	55.09	37.47	39.95
CBU_1276	269	45.6	53.16	41.26	42.38
CBU_1277	236	42.37	50.42	37.71	38.98
CBU_1278	186	42.6533	50.54	35.48	41.94
CBU_1279	201	36.32	40.8	30.85	37.31
CBU_1279a	41	47.1567	51.22	53.66	36.59
CBU_1280	174	44.06	54.6	35.63	41.95
CBU_1280a	80	46.6667	55	37.5	47.5
CBU_1281	1074	45.7467	54.75	40.13	42.36
CBU_1282	403	47.0633	55.33	42.93	42.93
CBU_1282a	534	43.4367	41.57	44.65	44.09
CBU_1284	437	39.13	47.14	35.93	34.32
CBU_1285	453	41.28	41.94	41.5	40.4
CBU_1286	461	40.06	49.46	35.36	35.36
CBU_1287	593	39.0533	38.95	42.91	35.3
CBU_1289	375	51.1967	62.13	44.53	46.93
CBU_1290	657	47.8967	59.36	36.38	47.95
CBU_1291	198	48.3133	61.11	43.43	40.4
CBU_1292	466	40.4867	50.43	33.26	37.77
CBU_1293	209	45.93	62.2	36.36	39.23
CBU_1294	126	40.7367	44.44	33.33	44.44
CBU_1295	110	37.2733	43.64	32.73	35.45
CBU_1296	300	47.6667	57.33	36.67	49
CBU_1297	557	40.5167	52.78	32.32	36.45
CBU_1298	593	37.4767	41.32	37.33	33.78
CBU_1300	116	45.4033	53.45	43.1	39.66
CBU_1301	156	44.87	58.33	30.13	46.15
CBU_1302	127	44.8833	43.31	39.37	51.97
CBU_1303	102	49.3467	55.88	41.18	50.98
CBU_1304	147	44.9	51.02	38.78	44.9
CBU_1305	160	46.25	58.12	33.75	46.88
CBU_1306	285	43.5067	53.68	40	36.84
CBU_1307	139	43.1633	46.76	43.88	38.85
CBU_1308	222	35.5867	47.75	29.28	29.73
CBU_1308a	183	37.8867	46.99	35.52	31.15
CBU_1310	35	35.24	40	34.29	31.43
CBU_1311	814	36.61	45.7	31.33	32.8
CBU_1312	38	30.7033	39.47	26.32	26.32
CBU_1313	42	31.7467	40.48	26.19	28.57
CBU_1314	215	44.8067	51.16	45.12	38.14
CBU_1314a	48	38.1967	43.75	41.67	29.17
CBU_1316	76	37.28	40.79	31.58	39.47
CBU_1316a	36	50	47.22	47.22	55.56
CBU_1317	43	38.76	44.19	37.21	34.88
CBU_1318	208	35.2533	45.19	33.65	26.92
CBU_1319	112	45.24	55.36	34.82	45.54
CBU_1320	104	44.8733	55.77	36.54	42.31
CBU_1321	793	46.5767	57.38	38.21	44.14
CBU_1322	329	41.8433	53.8	33.13	38.6
CBU_1323	120	47.2233	56.67	45	40
CBU_1323a	34	49.02	50	38.24	58.82
CBU_1324	65	43.0767	46.15	43.08	40
CBU_1325	170	47.2533	58.82	33.53	49.41
CBU_1326	661	46.7433	57.03	37.97	45.23
CBU_1328	91	43.2233	53.85	37.36	38.46
CBU_1329	357	42.2067	48.46	38.66	39.5
CBU_1330	439	40.2733	40.32	41.23	39.27
CBU_1331	126	44.9767	55.56	34.13	45.24
CBU_1332	51	45.7533	49.02	43.14	45.1
CBU_1332a	36	39.8167	41.67	41.67	36.11
CBU_1333	264	43.1833	45.08	39.39	45.08
CBU_1334	378	39.42	44.71	31.22	42.33
CBU_1335	383	34.03	41.78	32.11	28.2
CBU_1336	306	39.2167	38.24	38.89	40.52
CBU_1337	1144	43.56	56.56	35.66	38.46
CBU_1338	374	45.1867	53.74	39.57	42.25
CBU_1339	203	44.17	54.68	38.42	39.41
CBU_1340	99	40.74	51.52	34.34	36.36
CBU_1341	525	42.6667	55.62	34.86	37.52
CBU_1342	490	48.1633	57.55	42.04	44.9
CBU_1343	495	42.0867	47.27	40.4	38.59
CBU_1345	430	41.3967	44.65	37.21	42.33
CBU_1346	461	44.0367	53.8	39.7	38.61
CBU_1347	475	42.4533	40.42	41.47	45.47
CBU_1348	56	58.9267	55.36	60.71	60.71
CBU_1349	580	36.09	43.79	31.38	33.1
CBU_1350	447	46.61	55.93	37.81	46.09
CBU_1351	298	43.6267	50.67	38.26	41.95
CBU_1352	648	46.5533	58.02	37.81	43.83
CBU_1353	213	44.9133	53.52	34.74	46.48
CBU_1354	181	46.9633	58.01	34.81	48.07
CBU_1355	118	37.57	45.76	33.05	33.9
CBU_1356	159	43.8167	49.69	42.14	39.62
CBU_1357	406	43.1867	53.45	36.21	39.9
CBU_1358	427	43.2467	52.69	35.13	41.92
CBU_1359	245	41.2233	53.88	32.65	37.14
CBU_1360	485	44.0567	50.52	39.18	42.47
CBU_1361	154	49.1367	50.65	43.51	53.25
CBU_1362	379	44.4133	52.24	34.56	46.44
CBU_1363	459	41.3933	53.38	34.42	36.38
CBU_1364	500	40.3167	44	37.47	39.48
CBU_1366	111	40.84	53.15	27.93	41.44
CBU_1367	604	46.8533	54.14	41.39	45.03
CBU_1369	340	40.1933	46.76	37.94	35.88
CBU_1370	329	34.65	44.07	29.18	30.7
CBU_1371	227	45.96	52.86	40.97	44.05
CBU_1372	194	44.5033	47.94	41.24	44.33
CBU_1373	431	41.9167	50.81	36.66	38.28
CBU_1374	160	38.33	45.62	33.12	36.25
CBU_1375	715	41.8167	51.75	36.36	37.34
CBU_1376	455	47.5467	54.73	38.46	49.45
CBU_1376a	12	44.4433	33.33	50	50
CBU_1379	677	35.45	46.53	30.87	28.95
CBU_1379a	283	42.52	49.82	39.93	37.81
CBU_1380	282	39.0067	43.26	36.88	36.88
CBU_1381	273	41.1467	42.86	40.29	40.29
CBU_1382	238	42.8567	53.36	35.71	39.5
CBU_1383	186	45.88	55.38	37.1	45.16
CBU_1384	244	49.18	58.2	38.52	50.82
CBU_1385	297	47.5867	60.27	38.05	44.44
CBU_1386	360	45.9267	54.17	36.94	46.67
CBU_1387	217	42.09	44.24	41.94	40.09
CBU_1388	271	46.9867	54.24	38.38	48.34
CBU_1388d	55	43.0333	52.73	43.64	32.73
CBU_1389	463	43.8333	46.22	42.42	42.86
CBU_1390	180	42.68	48.33	31.67	48.04
CBU_1391	264	41.2233	38.64	38.64	46.39
CBU_1393	1477	38.9733	39	42.89	35.03
CBU_1394	176	44.6967	50	50	34.09
CBU_1395	149	33.3333	36.24	30.2	33.56
CBU_1396	295	49.1533	57.63	45.42	44.41
CBU_1397	391	44.0767	57.29	35.55	39.39
CBU_1398	406	42.2833	55.91	32.02	38.92
CBU_1399	935	44.03	53.48	37.86	40.75
CBU_1400	244	42.0767	50	39.75	36.48
CBU_1401	588	48.5833	57.82	41.16	46.77
CBU_1402	116	42.5267	42.24	35.34	50
CBU_1403	166	41.9667	45.18	35.54	45.18
CBU_1404	111	45.0467	46.85	49.55	38.74
CBU_1405	94	35.8167	37.23	35.11	35.11
CBU_1406	278	37.8133	40.29	36.33	36.82
CBU_1408	35	51.43	57.14	42.86	54.29
CBU_1409	279	38.47	40.86	38.71	35.84
CBU_1410	431	43.93	50.81	37.82	43.16
CBU_1411	57	56.7267	59.65	56.14	54.39
CBU_1412	274	45.7433	49.64	42.7	44.89
CBU_1413	260	44.4867	47.69	43.46	42.31
CBU_1414	264	41.4167	44.7	39.02	40.53
CBU_1415	339	43.66	51.92	40.12	38.94
CBU_1416	239	42.82	50.63	40.17	37.66
CBU_1417	139	43.8867	53.96	29.5	48.2
CBU_1418	158	45.15	55.7	38.61	41.14
CBU_1419	420	48.0933	57.14	40.71	46.43
CBU_1420	293	39.1367	43	38.23	36.18
CBU_1422	452	48.38	58.63	40.71	45.8
CBU_1422a	48	32.64	35.42	35.42	27.08
CBU_1424	335	48.5567	59.4	40.3	45.97
CBU_1425	151	50.77	56.29	50.99	45.03
CBU_1426	38	37.7167	39.47	39.47	34.21
CBU_1427	1948	39.7067	37.17	35.57	46.38
CBU_1427a	39	27.3533	23.08	30.77	28.21
CBU_1429	182	46.52	48.9	37.91	52.75
CBU_1429a	115	44.9267	40	44.35	50.43
CBU_1430	310	46.8833	55.16	40.65	44.84
CBU_1431	120	38.33	53.33	30.83	30.83
CBU_1432	804	49.2133	62.19	38.93	46.52
CBU_1433	504	45.4367	60.32	33.73	42.26
CBU_1434	154	50.8667	62.34	39.61	50.65
CBU_1435	483	43.4767	47.62	36.02	46.79
CBU_1436	507	42.2133	44.58	37.48	44.58
CBU_1437	654	44.75	47.09	41.9	45.26
CBU_1438	102	37.5833	38.24	32.35	42.16
CBU_1439	202	41.0867	48.51	31.68	43.07
CBU_1440	169	44.7767	50.3	40.83	43.2
CBU_1441	341	45.16	49.85	40.76	44.87
CBU_1442	788	47.5867	55.71	42.13	44.92
CBU_1443	423	45.9433	52.01	43.5	42.32
CBU_1444	175	40.57	49.14	33.14	39.43
CBU_1445	418	47.7667	57.89	37.08	48.33
CBU_1446	228	46.7833	59.21	35.96	45.18
CBU_1447	162	47.9433	53.7	46.3	43.83
CBU_1448	121	41.05	49.59	35.54	38.02
CBU_1449	99	49.1567	48.48	52.53	46.46
CBU_1450	272	49.51	61.03	43.38	44.12
CBU_1451	523	38.1733	48.18	32.31	34.03
CBU_1452	1495	39.9033	42.61	40.29	36.81
CBU_1457	677	40.57	49.63	34.86	37.22
CBU_1458	387	41.1733	51.42	32.82	39.28
CBU_1458a	49	33.3333	42.86	24.49	32.65
CBU_1459	127	39.1067	43.31	41.73	32.28
CBU_1460	262	36.5133	46.18	33.97	29.39
CBU_1461	757	42.6	39.1	39.63	49.07
CBU_1462a	55	37.5767	27.27	41.82	43.64
CBU_1463	66	50.5067	51.52	46.97	53.03
CBU_1464	95	45.6133	57.89	42.11	36.84
CBU_1465	153	40.52	49.67	33.33	38.56
CBU_1466	114	42.1067	50	37.72	38.6
CBU_1467	478	47.49	56.49	43.51	42.47
CBU_1468	1154	42.3133	50.26	37.95	38.73
CBU_1469	163	44.3767	46.01	39.88	47.24
CBU_1470	293	47.5533	59.04	34.47	49.15
CBU_1471	353	49.9533	60.06	44.76	45.04
CBU_1472	67	45.77	55.22	32.84	49.25
CBU_1473	100	43	56	28	45
CBU_1474	484	46.6267	51.24	43.6	45.04
CBU_1475	478	43.7233	54.81	35.77	40.59
CBU_1476	312	44.7667	53.85	35.58	44.87
CBU_1477	180	47.2233	57.78	33.89	50
CBU_1478	206	39.97	48.06	34.47	37.38
CBU_1479	131	39.6967	47.33	38.17	33.59
CBU_1480	217	40.4	48.39	35.02	37.79
CBU_1481	118	42.0933	50	41.53	34.75
CBU_1482	250	44.2667	57.2	30.4	45.2
CBU_1483	459	45.6067	52.51	41.83	42.48
CBU_1484	429	45.6867	48.95	42.42	45.69
CBU_1485	226	37.7567	44.69	34.51	34.07
CBU_1486	56	61.9033	66.07	57.14	62.5
CBU_1486	56	61.9033	66.07	57.14	62.5
CBU_1487	461	43.17	53.8	33.84	41.87
CBU_1488	466	45.85	53.86	38.63	45.06
CBU_1489	244	42.8967	50.41	34.84	43.44
CBU_1490	104	45.5133	50	39.42	47.12
CBU_1491	113	35.69	39.82	32.74	34.51
CBU_1492	382	42.1467	48.17	37.96	40.31
CBU_1493	558	40.0833	46.06	36.38	37.81
CBU_1494	252	49.47	62.7	36.11	49.6
CBU_1495	790	39.1467	42.03	41.44	33.97
CBU_1497	44	43.1833	38.64	40.91	50
CBU_1498	390	48.29	45.9	47.04	51.93
CBU_1501	232	40.5167	49.57	34.48	37.5
CBU_1502	296	43.2433	50.68	35.81	43.24
CBU_1503	234	45.87	53.85	39.74	44.02
CBU_1504	257	41.3733	50.19	33.46	40.47
CBU_1505	615	47.8067	59.35	37.4	46.67
CBU_1506	146	39.9533	51.37	32.19	36.3
CBU_1507	743	45.2667	54.64	40.92	40.24
CBU_1508	544	40.2567	53.31	34.19	33.27
CBU_1509	450	46	54.67	38	45.33
CBU_1510	317	46.7933	55.84	38.8	45.74
CBU_1511	262	45.5433	50.38	39.69	46.56
CBU_1512	238	37.5333	44.12	31.93	36.55
CBU_1513	259	45.69	52.9	39.77	44.4
CBU_1516	84	33.7267	34.52	36.9	29.76
CBU_1517	153	44.88	50.98	41.18	42.48
CBU_1518	333	49.35	58.86	40.84	48.35
CBU_1519	162	44.8533	58.02	33.33	43.21
CBU_1520	86	44.5733	54.65	38.37	40.7
CBU_1521	145	44.8267	52.41	34.48	47.59
CBU_1522	42	50	57.14	38.1	54.76
CBU_1523	336	44.7367	38.99	48.06	47.16
CBU_1525	1010	41.5467	45.45	38.85	40.34
CBU_1526a	32	45.8367	46.88	31.25	59.38
CBU_1527	461	41.5767	47.29	36.01	41.43
CBU_1529	637	46.2067	54.79	42.86	40.97
CBU_1530	646	41.3833	52.94	38.39	32.82
CBU_1530a	100	41.6667	42	39	44
CBU_1531	444	41.7	43.69	38.29	43.12
CBU_1533	650	39.3567	40.46	35.08	42.53
CBU_1536	520	46.41	57.31	38.27	43.65
CBU_1537	414	43.8	54.35	36.47	40.58
CBU_1538	457	46.0967	52.95	36.76	48.58
CBU_1539	427	43.0133	44.03	38.64	46.37
CBU_1540	110	37.8767	37.27	45.45	30.91
CBU_1541	33	52.5267	60.61	39.39	57.58
CBU_1542	110	44.5433	56.36	48.18	29.09
CBU_1543	189	39.5067	49.21	32.8	36.51
CBU_1544	331	39.1733	47.73	37.16	32.63
CBU_1545	161	32.8	26.71	29.81	41.88
CBU_1547	265	41.51	49.81	37.36	37.36
CBU_1548	125	41.0667	48	35.2	40
CBU_1549	262	47.5833	54.58	43.13	45.04
CBU_1550	767	46.8067	59.97	36.77	43.68
CBU_1551	229	48.0333	57.64	41.92	44.54
CBU_1552	37	45.9467	43.24	45.95	48.65
CBU_1552a	34	40.1967	41.18	26.47	52.94
CBU_1553	942	45.6833	53.08	37.58	46.39
CBU_1554	402	44.36	51.49	34.58	47.01
CBU_1555	382	42.1467	48.17	37.96	40.31
CBU_1556	568	42.1933	47.36	37.85	41.37
CBU_1558	92	44.9267	50	39.13	45.65
CBU_1559	210	47.94	55.24	38.1	50.48
CBU_1559a	31	34.4067	29.03	35.48	38.71
CBU_1560	42	38.0933	45.24	33.33	35.71
CBU_1561	263	44.4867	45.63	36.12	51.71
CBU_1562	849	37.4533	39.69	33.57	39.1
CBU_1565	611	46.5333	56.3	37.15	46.15
CBU_1566	245	49.3867	60.41	39.59	48.16
CBU_1567	173	51.2533	58.96	43.93	50.87
CBU_1568	201	49.9167	58.21	38.31	53.23
CBU_1569	548	37.9567	44.89	33.58	35.4
CBU_1570	352	47.4433	59.66	38.64	44.03
CBU_1570a	91	43.22	47.25	37.36	45.05
CBU_1570b	365	48.49	53.42	40	52.05
CBU_1573	412	47.0067	48.79	42.72	49.51
CBU_1574	238	43.98	48.74	40.76	42.44
CBU_1575	148	38.51	52.7	29.05	33.78
CBU_1576	840	40	47.38	37.98	34.64
CBU_1577	315	42.2233	53.02	36.51	37.14
CBU_1578	279	41.3367	44.44	35.84	43.73
CBU_1579	198	50.34	51.52	48.99	50.51
CBU_1580	366	36.7933	48.36	29.78	32.24
CBU_1581	41	62.6	63.41	60.98	63.41
CBU_1581	41	62.6	63.41	60.98	63.41
CBU_1582	127	42.5167	45.67	40.94	40.94
CBU_1583	101	38.61	47.52	32.67	35.64
CBU_1584	116	38.22	45.69	31.9	37.07
CBU_1585	500	37.8667	40.6	36.6	36.4
CBU_1586	124	42.2067	41.94	41.13	43.55
CBU_1587	136	41.9133	42.65	41.91	41.18
CBU_1588	769	40.57	45.25	37.45	39.01
CBU_1589	103	48.5433	53.4	46.6	45.63
CBU_1590	418	43.06	46.41	34.21	48.56
CBU_1590a	91	43.22	47.25	37.36	45.05
CBU_1590b	365	48.49	53.42	40	52.05
CBU_1593	87	43.6767	54.02	37.93	39.08
CBU_1594	150	47.5533	59.33	31.33	52
CBU_1595	573	46.0733	55.5	39.79	42.93
CBU_1596	699	45.4433	55.36	37.05	43.92
CBU_1597	37	44.1433	59.46	29.73	43.24
CBU_1598	732	41.09	44.26	38.11	40.9
CBU_1600	182	47.9867	53.85	43.41	46.7
CBU_1601	162	39.92	43.83	37.04	38.89
CBU_1602	302	44.37	50	39.4	43.71
CBU_1603	343	42.9533	51.31	39.07	38.48
CBU_1604	753	38.1167	46.22	33.2	34.93
CBU_1606	80	42.0833	42.5	50	33.75
CBU_1607	133	37.0933	40.6	39.1	31.58
CBU_1608	892	36.5	37.22	33.22	39.06
CBU_1612	32	29.1667	25	28.12	34.38
CBU_1613	52	30.77	32.69	34.62	25
CBU_1614	140	30.0033	36.43	29.29	24.29
CBU_1617	35	30.4733	28.57	25.71	37.14
CBU_1618	118	37.8567	44.92	30.51	38.14
CBU_1619	176	37.0133	37.5	30.11	43.43
CBU_1621	46	42.7533	50	39.13	39.13
CBU_1622	1004	44.89	52.89	40.54	41.24
CBU_1623	213	44.44	50.23	41.31	41.78
CBU_1624	139	45.5633	48.2	42.45	46.04
CBU_1625	170	46.86	49.41	38.82	52.35
CBU_1626	245	48.3033	58.37	38.78	47.76
CBU_1627	1040	50.8	56.54	49.9	45.96
CBU_1628	352	49.15	51.14	46.31	50
CBU_1629	219	43.5333	45.21	36.99	48.4
CBU_1630	208	43.1067	43.75	39.42	46.15
CBU_1631	213	46.6333	51.64	43.66	44.6
CBU_1632	793	42.2867	50.69	35.31	40.86
CBU_1633	388	45.1867	52.32	37.11	46.13
CBU_1634	239	43.79	53.97	33.05	44.35
CBU_1634a	50	38	46	32	36
CBU_1635	58	56.8967	56.9	55.17	58.62
CBU_1636	392	43.6233	48.21	37.76	44.9
CBU_1638	402	37.5633	44.78	29.1	38.81
CBU_1639	399	42.3533	49.62	37.34	40.1
CBU_1639a	116	43.6433	43.1	46.09	41.74
CBU_1639c	365	48.49	53.42	40	52.05
CBU_1641	86	50	50	44.19	55.81
CBU_1642	113	47.4933	53.98	35.4	53.1
CBU_1643	170	49.41	51.76	43.53	52.94
CBU_1644	275	46.67	54.55	41.82	43.64
CBU_1645	373	49.42	58.18	43.7	46.38
CBU_1646	445	39.9967	41.12	37.75	41.12
CBU_1647	32	52.0833	46.88	53.12	56.25
CBU_1648	815	46.0533	51.04	42.7	44.42
CBU_1649	165	40.4033	41.21	36.97	43.03
CBU_1650	150	46.6667	56.67	34	49.33
CBU_1651	153	42.7	44.44	52.29	31.37
CBU_1652	377	40.67	49.6	34.48	37.93
CBU_1653	143	44.62	44.06	47.55	42.25
CBU_1653a	61	42.0767	42.62	36.07	47.54
CBU_1655	497	47.4133	59.15	39.03	44.06
CBU_1656	34	34.31	35.29	32.35	35.29
CBU_1657	255	43.9233	50.98	37.65	43.14
CBU_1658	362	44.3833	52.21	37.57	43.37
CBU_1659	437	43.25	45.77	41.19	42.79
CBU_1660	295	44.86	50.17	40	44.41
CBU_1661	344	50.9667	55.23	46.22	51.45
CBU_1662	69	46.3767	55.07	42.03	42.03
CBU_1663	44	38.6367	52.27	25	38.64
CBU_1664	198	41.92	53.03	30.81	41.92
CBU_1665	580	39.6567	47.59	33.1	38.28
CBU_1666	577	38.81	37.61	36.81	42.01
CBU_1669	353	43.72	56.09	35.41	39.66
CBU_1670	231	50.94	58.01	48.92	45.89
CBU_1671	259	50.1967	57.92	42.86	49.81
CBU_1673	90	36.6667	48.89	22.22	38.89
CBU_1674	429	44.7567	53.85	39.39	41.03
CBU_1675	281	45.7867	55.16	40.21	41.99
CBU_1675a	52	46.7933	51.92	51.92	36.54
CBU_1676	362	38.49	48.34	30.94	36.19
CBU_1677	145	37.47	51.72	23.45	37.24
CBU_1678	171	38.9867	50.88	28.07	38.01
CBU_1679	468	35.3267	44.87	31.62	29.49
CBU_1681	99	42.7567	47.47	39.39	41.41
CBU_1682	556	48.26	58.09	38.67	48.02
CBU_1683	44	46.2133	34.09	54.55	50
CBU_1685	474	30.5933	38.82	25.74	27.22
CBU_1686	774	33.55	44.57	29.59	26.49
CBU_1687	767	39.7133	40.29	39.95	38.9
CBU_1688	189	41.9733	46.56	38.62	40.74
CBU_1689	307	49.8367	57.65	41.37	50.49
CBU_1690	34	37.2567	41.18	29.41	41.18
CBU_1691	109	42.5067	51.38	42.2	33.94
CBU_1692	57	32.1633	43.86	22.81	29.82
CBU_1692a	42	40.4767	45.24	30.95	45.24
CBU_1693	612	38.3133	36.27	31.86	46.81
CBU_1695	547	42.4767	50.46	36.2	40.77
CBU_1696	214	48.2867	54.21	44.86	45.79
CBU_1697	219	41.4	48.86	37.9	37.44
CBU_1698	420	41.1133	46.67	39.29	37.38
CBU_1699	519	46.37	51.83	42.58	44.7
CBU_1699a	365	48.4	53.42	40	51.78
CBU_1699b	99	43.43	48.48	36.36	45.45
CBU_16SA	486	53.8067	56.79	52.88	51.75
CBU_1701	469	43.4267	50.53	44.78	34.97
CBU_1702	45	44.4433	42.22	40	51.11
CBU_1703	352	44.6967	55.68	38.64	39.77
CBU_1704	225	43.11	56	36.89	36.44
CBU_1705	130	39.7467	44.62	34.62	40
CBU_1706	201	46.1033	59.2	38.81	40.3
CBU_1707	31	40.86	54.84	35.48	32.26
CBU_1708	194	42.2667	48.97	35.05	42.78
CBU_1709	240	44.5833	51.67	37.08	45
CBU_1710	146	31.05	35.62	29.45	28.08
CBU_1711	63	33.8633	41.27	25.4	34.92
CBU_1712	97	33.3333	37.11	32.99	29.9
CBU_1713	492	44.24	52.24	41.46	39.02
CBU_1714	447	45.2633	54.81	41.16	39.82
CBU_1715	131	42.4933	55.73	32.06	39.69
CBU_1716	392	47.0233	58.42	42.6	40.05
CBU_1716a	365	48.49	53.42	40	52.05
CBU_1716b	104	43.2667	44.23	39.42	46.15
CBU_1718	553	46.9533	58.95	37.97	43.94
CBU_1719	117	45.87	61.54	35.9	40.17
CBU_1720	918	47.3133	56.1	40.31	45.53
CBU_1721	237	38.68	45.99	31.65	38.4
CBU_1722	600	39.6133	48.17	34	36.67
CBU_1723	631	48.39	53.09	42	50.08
CBU_1724	748	38.59	47.06	31.95	36.76
CBU_1724a	49	45.58	48.98	40.82	46.94
CBU_1725	155	50.5367	60	38.71	52.9
CBU_1726	449	46.6267	57.02	38.98	43.88
CBU_1727	337	40.9467	46.88	32.34	43.62
CBU_1728	206	40.13	42.72	37.86	39.81
CBU_1729	317	45.32	56.15	41.32	38.49
CBU_1730	259	42.8567	52.51	33.98	42.08
CBU_1731	465	43.23	43.66	44.52	41.51
CBU_1732	389	44.3867	53.47	34.19	45.5
CBU_1733	634	44.7967	49.21	41.8	43.38
CBU_1734	238	40.7533	51.26	34.87	36.13
CBU_1735	382	46.86	54.71	39.27	46.6
CBU_1736	364	48.9933	56.87	42.31	47.8
CBU_1737	216	49.07	56.94	39.81	50.46
CBU_1738	113	43.6567	55.75	36.28	38.94
CBU_1739	286	43.59	54.2	37.76	38.81
CBU_1740	56	49.4067	55.36	51.79	41.07
CBU_1741	397	45.8433	49.87	44.08	43.58
CBU_1742	121	38.29	45.45	33.06	36.36
CBU_1743	200	45.3333	51.5	42	42.5
CBU_1744	192	47.9167	56.77	42.19	44.79
CBU_1745	231	42.4233	47.62	35.93	43.72
CBU_1746	135	44.4467	57.04	37.04	39.26
CBU_1747	221	42.99	50.23	33.94	44.8
CBU_1748	140	52.8567	62.86	50	45.71
CBU_1749	143	47.7833	57.34	36.36	49.65
CBU_1749a	89	43.0733	58.43	30.34	40.45
CBU_1751	421	44.42	55.82	33.97	43.47
CBU_1752	413	37.9333	45.04	34.38	34.38
CBU_1753	139	42.4467	53.24	29.5	44.6
CBU_1754	199	49.5833	59.8	39.7	49.25
CBU_1755	42	45.24	54.76	40.48	40.48
CBU_1756	394	45.3467	47.72	42.13	46.19
CBU_1757	852	40.5633	39.79	48.53	33.37
CBU_1758a	355	48.3567	52.96	40.28	51.83
CBU_1758b	115	42.32	45.22	36.52	45.22
CBU_1760	38	50	52.63	47.37	50
CBU_1761	658	40.4267	50.15	32.83	38.3
CBU_1762	461	44.6133	54.45	39.26	40.13
CBU_1763	445	44.1933	51.01	39.55	42.02
CBU_1764	36	36.1133	41.67	30.56	36.11
CBU_1764a	119	40.06	40.34	38.66	41.18
CBU_1765	73	45.6667	47.95	39.73	49.32
CBU_1766	817	46.6333	52.88	41.49	45.53
CBU_1767	90	49.26	57.78	34.44	55.56
CBU_1768	154	41.3433	42.21	42.21	39.61
CBU_1769	206	45.7933	55.83	35.92	45.63
CBU_1770	439	43.81	56.49	34.62	40.32
CBU_1771	582	44.7867	47.25	40.89	46.22
CBU_1772	206	45.47	53.4	38.35	44.66
CBU_1774	146	47.7167	57.53	45.21	40.41
CBU_1775	308	34.0533	35.39	39.41	27.36
CBU_1777	62	40.86	45.16	33.87	43.55
CBU_1778	364	48.17	59.34	42.86	42.31
CBU_1780	530	42.6433	49.06	39.62	39.25
CBU_1781	485	45.36	54.43	36.29	45.36
CBU_1782	405	43.7867	53.33	37.78	40.25
CBU_1783	335	41.79	51.34	36.72	37.31
CBU_1784	673	48.8833	56.76	41.6	48.29
CBU_1785	365	48.58	53.42	40.27	52.05
CBU_1785a	91	43.22	47.25	37.36	45.05
CBU_1786	401	40.5633	50.12	33.42	38.15
CBU_1787	612	44.4467	54.41	38.73	40.2
CBU_1788	197	43.4867	54.82	34.52	41.12
CBU_1789	289	47.1733	53.98	41.87	45.67
CBU_1790	635	34.7	39.53	31.18	33.39
CBU_1792x	348	41.3233	39.94	41.38	42.65
CBU_1794	273	39.5633	43.96	38.1	36.63
CBU_1795	903	44.0767	53.27	34.22	44.74
CBU_1796	543	48.1267	50.64	44.2	49.54
CBU_1797	147	43.0833	51.7	36.73	40.82
CBU_1798	648	43.2067	47.99	37.19	44.44
CBU_1799	154	37.23	44.16	31.82	35.71
CBU_1799a	153	38.1267	46.41	36.6	31.37
CBU_1800	253	34.3867	35.18	33.99	33.99
CBU_1801	99	37.0333	41.41	36.36	33.33
CBU_1802	213	34.74	43.19	27.7	33.33
CBU_1803	43	38.76	46.51	27.91	41.86
CBU_1804	85	37.6467	40	36.47	36.47
CBU_1805	128	36.4567	42.97	32.81	33.59
CBU_1806	96	36.46	39.58	34.38	35.42
CBU_1806a	116	43.39	50.86	43.1	36.21
CBU_1808	405	44.1133	50.37	38.02	43.95
CBU_1809	222	42.7933	49.55	36.04	42.79
CBU_1810	392	43.7067	54.34	37.24	39.54
CBU_1811	508	45.8667	51.77	40.55	45.28
CBU_1812	376	44.9467	52.93	37.5	44.41
CBU_1813	43	41.0833	46.51	39.53	37.21
CBU_1814	238	45.94	52.1	44.54	41.18
CBU_1815	663	43.34	52.34	37.86	39.82
CBU_1816	189	48.6767	58.2	39.68	48.15
CBU_1817	322	41.7167	50.93	34.78	39.44
CBU_1818	482	37.0667	45.02	36.93	29.25
CBU_1819	378	37.6533	42.33	34.92	35.71
CBU_1820	175	40.76	56.57	33.14	32.57
CBU_1821	166	44.1767	53.01	39.76	39.76
CBU_1822	197	44.84	51.27	41.12	42.13
CBU_1823	350	35.05	42.86	31.43	30.86
CBU_1824	77	58.01	49.35	61.04	63.64
CBU_1824	77	58.01	49.35	61.04	63.64
CBU_1825	116	38.5067	41.38	33.62	40.52
CBU_1826	283	42.9933	50.53	38.52	39.93
CBU_1827	382	41.71	53.14	36.65	35.34
CBU_1828	418	42.82	55.02	37.08	36.36
CBU_1829	211	46.92	49.29	44.55	46.92
CBU_1830	320	48.75	56.25	39.06	50.94
CBU_1831	483	37.89	39.34	34.58	39.75
CBU_1831a	40	31.6667	27.5	32.5	35
CBU_1833	46	39.13	47.83	39.13	30.43
CBU_1834	305	43.61	51.15	32.79	46.89
CBU_1835	460	42.1733	52.39	37.61	36.52
CBU_1836	419	43.8367	55.61	37.95	37.95
CBU_1837	347	41.3033	53.31	33.14	37.46
CBU_1838	190	39.8267	50.53	33.16	35.79
CBU_1839	409	40.5033	48.41	34.96	38.14
CBU_1840	245	49.6633	62.86	38.37	47.76
CBU_1841	188	47.1633	56.91	38.3	46.28
CBU_1842	368	44.8367	55.71	36.68	42.12
CBU_1843	135	41.4833	38.52	35.56	50.37
CBU_1843a	50	51.3333	52	40	62
CBU_1843a	50	51.3333	52	40	62
CBU_1844	54	50.6167	53.7	46.3	51.85
CBU_1845	204	37.9067	37.25	35.29	41.18
CBU_1846	155	46.02	50.32	43.87	43.87
CBU_1847	82	39.43	48.78	31.71	37.8
CBU_1847a	473	40.8567	45.88	41.31	35.38
CBU_1847b	121	39.3933	39.67	41.32	37.19
CBU_1849	67	47.2633	47.76	41.79	52.24
CBU_1850	162	37.86	49.38	27.16	37.04
CBU_1851	599	37.6733	42.9	33.56	36.56
CBU_1852	465	37.3467	42.37	34.19	35.48
CBU_1853	150	37.78	40.67	34.67	38
CBU_1854	103	41.75	50.49	33.01	41.75
CBU_1855	116	35.92	42.24	31.9	33.62
CBU_1856	380	43.07	50.53	39.47	39.21
CBU_1857	531	40.99	50.66	36.53	35.78
CBU_1858	466	40.63	46.57	38.41	36.91
CBU_1859	337	39.96	46.29	34.72	38.87
CBU_1860	745	41.6567	49.13	37.72	38.12
CBU_1862	343	45.7733	54.81	37.9	44.61
CBU_1863	604	42.11	49.67	40.73	35.93
CBU_1864	32	30.2067	15.62	31.25	43.75
CBU_1865	181	44.0133	46.96	39.78	45.3
CBU_1866	754	46.7733	54.38	38.46	47.48
CBU_1867	53	44.6533	45.28	50.94	37.74
CBU_1867a	48	48.61	45.83	50	50
CBU_1869	218	39.7567	45.41	33.49	40.37
CBU_1870	216	45.9867	53.24	38.89	45.83
CBU_1871	202	42.2433	50.99	36.63	39.11
CBU_1872	232	39.51	48.71	34.48	35.34
CBU_1873	272	43.7467	52.94	35.29	43.01
CBU_1874	436	45.72	53.44	37.39	46.33
CBU_1875	322	46.1667	55.28	36.02	47.2
CBU_1876	255	44.8367	54.12	40	40.39
CBU_1877	428	34.11	41.59	29.67	31.07
CBU_1878	140	50	55.71	37.86	56.43
CBU_1879	210	40.4733	49.52	32.38	39.52
CBU_1880	140	40.9533	41.43	33.57	47.86
CBU_1881	58	50.5733	51.72	39.66	60.34
CBU_1882	436	47.3233	53.44	43.12	45.41
CBU_1883	185	36.7567	47.57	32.43	30.27
CBU_1884	160	39.5867	37.5	39.38	41.88
CBU_1886	47	35.46	34.04	29.79	42.55
CBU_1887	794	47.94	55.16	41.81	46.85
CBU_1888	265	41.3833	49.06	38.49	36.6
CBU_1889	144	35.7233	42.36	31.94	32.87
CBU_1890	103	30.1	39.81	21.36	29.13
CBU_1891	354	42.5633	48.59	36.16	42.94
CBU_1892	180	40.7433	52.78	33.89	35.56
CBU_1893	361	43.2133	56.79	32.41	40.44
CBU_1894	62	53.7667	53.23	43.55	64.52
CBU_1894	62	53.7667	53.23	43.55	64.52
CBU_1894a	52	52.5633	59.62	51.92	46.15
CBU_1895	89	38.2033	46.07	39.33	29.21
CBU_1896	413	42.6133	44.79	38.5	44.55
CBU_1896a	365	48.49	53.42	40	52.05
CBU_1896b	91	43.22	47.25	37.36	45.05
CBU_1899	194	42.7867	50	39.18	39.18
CBU_1901	444	44.07	50.45	40.09	41.67
CBU_1902	460	45.3633	54.78	36.96	44.35
CBU_1903	325	44.2067	52.62	37.54	42.46
CBU_1904	218	41.1333	46.79	36.7	39.91
CBU_1905	314	41.93	45.54	36.94	43.31
CBU_1906	50	42	44	44	38
CBU_1907	239	45.4667	53.14	41	42.26
CBU_1908	33	36.36	48.48	30.3	30.3
CBU_1909	289	46.9433	57.79	38.06	44.98
CBU_1910	253	42.6867	56.92	33.2	37.94
CBU_1911	40	49.1667	55	50	42.5
CBU_1913	320	46.3533	57.5	38.44	43.12
CBU_1914	693	41.0767	53.97	33.62	35.64
CBU_1915	431	39.1333	48.26	33.64	35.5
CBU_1916	147	42.63	55.78	34.01	38.1
CBU_1917	45	48.8867	53.33	53.33	40
CBU_1918	123	44.4467	48.78	39.84	44.72
CBU_1919	57	45.03	47.37	49.12	38.6
CBU_1920	567	46.68	51.15	40.21	48.68
CBU_1921	34	47.06	70.59	29.41	41.18
CBU_1922	474	44.6533	55.06	37.34	41.56
CBU_1924	628	49.4167	58.76	41.4	48.09
CBU_1925	205	46.18	51.22	36.59	50.73
CBU_1926	257	45.7833	52.92	41.63	42.8
CBU_1927	291	46.2767	57.39	38.83	42.61
CBU_1928	937	41.98	50.27	38.53	37.14
CBU_1929	465	44.5867	47.31	41.29	45.16
CBU_1930	61	36.61	29.51	42.62	37.7
CBU_1930a	97	40.55	40.21	46.39	35.05
CBU_1931	44	46.9667	45.45	43.18	52.27
CBU_1932	67	43.78	43.28	43.28	44.78
CBU_1933	285	40.2333	48.77	31.58	40.35
CBU_1934	816	38.5233	47.92	33.21	34.44
CBU_1934a	36	50.0033	55.56	52.78	41.67
CBU_1936	266	43.2333	52.63	39.85	37.22
CBU_1937	393	37.3767	42.49	32.14	37.5
CBU_1938	162	50.8233	54.32	45.06	53.09
CBU_1939	265	45.1567	49.43	34.34	51.7
CBU_1940	101	47.5233	53.47	44.55	44.55
CBU_1941	157	42.25	58.6	31.21	36.94
CBU_1942	186	38.1733	48.39	27.42	38.71
CBU_1943	516	46.1233	56.4	37.98	43.99
CBU_1944	290	44.9433	56.55	35.52	42.76
CBU_1945	484	48.28	58.68	39.26	46.9
CBU_1946	143	47.0867	57.34	39.16	44.76
CBU_1947	456	48.17	55.48	39.91	49.12
CBU_1947a	62	48.3867	45.16	50	50
CBU_1948	59	54.24	61.02	47.46	54.24
CBU_1949	383	40.0333	50.91	35.51	33.68
CBU_1950	149	42.73	44.3	40.27	43.62
CBU_1951	39	44.4433	51.28	30.77	51.28
CBU_1952	533	43.1533	53.28	36.59	39.59
CBU_1953	190	43.3333	46.84	48.95	34.21
CBU_1954	291	41.1233	52.92	31.62	38.83
CBU_1955	420	47.38	53.57	43.81	44.76
CBU_1956	100	41	46	39	38
CBU_1957	457	43.69	49.23	37.2	44.64
CBU_1958	216	36.2633	37.04	31.94	39.81
CBU_1959a	91	43.22	47.25	37.36	45.05
CBU_1959b	365	48.49	53.42	40	52.05
CBU_1960	261	42.0167	50.57	41.38	34.1
CBU_1962	704	41.8567	51.28	34.09	40.2
CBU_1964	278	42.3267	53.6	38.13	35.25
CBU_1965	362	44.3833	59.67	36.19	37.29
CBU_1966	414	47.7433	58.45	39.13	45.65
CBU_1967	410	42.1933	45.61	38.29	42.68
CBU_1968	101	39.93	47.52	32.67	39.6
CBU_1969	148	44.37	55.41	37.16	40.54
CBU_1970	277	48.5	59.57	41.16	44.77
CBU_1971	53	42.7667	45.28	37.74	45.28
CBU_1972	74	36.0367	36.49	32.43	39.19
CBU_1973	52	39.1033	46.15	23.08	48.08
CBU_1975	237	45.57	51.9	39.24	45.57
CBU_1976	220	40.9067	50.45	36.82	35.45
CBU_1977	366	41.1667	50.55	34.7	38.25
CBU_1978	871	44.3933	48.45	40.41	44.32
CBU_1980	322	40.4767	49.38	32.3	39.75
CBU_1981	308	47.0767	56.82	42.53	41.88
CBU_1982	259	41.3133	49.42	31.66	42.86
CBU_1983	145	47.3567	59.31	34.48	48.28
CBU_1984	125	39.2	46.4	43.2	28
CBU_1985	233	38.4833	45.92	38.2	31.33
CBU_1986	314	45.65	54.46	36.31	46.18
CBU_1987	292	45.8933	52.74	38.36	46.58
CBU_1987a	45	34.8133	28.89	42.22	33.33
CBU_1987b	365	48.49	53.42	40	52.05
CBU_1987c	91	43.22	47.25	37.36	45.05
CBU_1991	85	40.3933	52.94	30.59	37.65
CBU_1992	92	36.5933	44.57	30.43	34.78
CBU_1993	162	40.9467	46.3	33.33	43.21
CBU_1994	268	44.2767	45.52	41.79	45.52
CBU_1995	96	46.53	56.25	36.46	46.88
CBU_1996	185	43.6067	56.22	38.38	36.22
CBU_1997	315	46.9833	56.51	41.27	43.17
CBU_1998	309	50.27	56.31	44.01	50.49
CBU_1999	160	42.29	55.62	27.5	43.75
CBU_2000	766	43.1233	52.61	38.51	38.25
CBU_2001	57	47.37	50.88	40.35	50.88
CBU_2002	167	48.1033	58.08	44.31	41.92
CBU_2003	187	51.3367	56.15	44.92	52.94
CBU_2003a	47	50.3533	51.06	48.94	51.06
CBU_2004	352	42.0433	50.28	38.35	37.5
CBU_2005	426	43.4267	50.47	36.38	43.43
CBU_2006	246	48.9133	57.72	39.43	49.59
CBU_2007	396	35.7767	44.7	30.81	31.82
CBU_2008	593	46.77	56.16	35.75	48.4
CBU_2009	445	37.5267	45.39	30.79	36.4
CBU_2010	105	46.0333	50.48	43.81	43.81
CBU_2011	205	47.8067	54.15	41.95	47.32
CBU_2012	466	47.4267	59.23	37.34	45.71
CBU_2013	366	44.5333	54.64	38.52	40.44
CBU_2014	128	38.54	46.09	32.81	36.72
CBU_2014a	493	41.8133	45.03	37.73	42.68
CBU_2016	199	37.5233	51.76	29.65	31.16
CBU_2017	251	46.6167	55.78	35.46	48.61
CBU_2018	205	40.9767	45.37	38.05	39.51
CBU_2019	542	43.9733	53.32	35.98	42.62
CBU_2020	477	40.88	42.56	38.78	41.3
CBU_2021	432	39.2767	45.37	32.18	40.28
CBU_2022	474	51.41	46.62	59.62	47.99
CBU_2023	82	41.4633	51.22	26.83	46.34
CBU_2024	317	45.8433	56.78	37.22	43.53
CBU_2025	388	46.13	55.15	39.43	43.81
CBU_2026	201	47.7467	52.74	41	49.5
CBU_2027	96	35.4167	38.54	38.54	29.17
CBU_2028	249	42.0333	53.41	39.76	32.93
CBU_2029	211	44.5533	51.66	35.55	46.45
CBU_2030	394	52.1133	60.15	43.91	52.28
CBU_2031	439	45.1033	53.3	38.5	43.51
CBU_2032	255	39.35	46.67	28.63	42.75
CBU_2033	87	40.9967	34.48	44.83	43.68
CBU_2034	373	52.2433	53.62	41.55	61.56
CBU_2036	59	53.11	47.46	50.85	61.02
CBU_2037	582	41.2967	47.08	36.6	40.21
CBU_2039	704	39.9633	47.59	34.23	38.07
CBU_2040	443	43.1133	56.88	33.86	38.6
CBU_2041	112	36.6067	47.32	33.93	28.57
CBU_2042	547	37.6267	32.36	36.38	44.14
CBU_2044	713	42.12	37.59	48.74	40.03
CBU_2046	36	43.5167	44.44	41.67	44.44
CBU_2047	291	42.84	52.23	37.8	38.49
CBU_2048	776	43.8133	51.16	37.5	42.78
CBU_2049	357	44.4433	54.9	36.97	41.46
CBU_2050	346	44.7467	46.24	41.62	46.38
CBU_2051a	80	40.4167	45	35	41.25
CBU_2052	301	38.2067	43.52	35.88	35.22
CBU_2054	724	46.18	54.56	38.81	45.17
CBU_2055	238	45.1	54.2	37.82	43.28
CBU_2056	221	44.3433	52.94	38.91	41.18
CBU_2057	326	42.2267	54.29	29.75	42.64
CBU_2058	444	43.77	46.85	39.19	45.27
CBU_2059	531	40.8933	38.98	36.72	46.98
CBU_2061	46	32.61	32.61	32.61	32.61
CBU_2062	463	37.87	42.12	38.66	32.83
CBU_2065	213	40.3767	46.01	38.97	36.15
CBU_2066	275	40.0467	42.18	37.45	40.51
CBU_2067	467	40.6867	42.4	40.26	39.4
CBU_2068	447	45.9367	48.77	42.06	46.98
CBU_2069	197	44.33	51.27	39.59	42.13
CBU_2070	137	38.69	48.18	32.85	35.04
CBU_2071	161	42.0267	46.58	33.54	45.96
CBU_2072	166	44.5767	48.19	39.76	45.78
CBU_2073	301	41.0867	47.18	33.22	42.86
CBU_2074	308	44.0467	57.79	38.96	35.39
CBU_2075	234	39.03	48.72	29.91	38.46
CBU_2076	106	41.1967	54.72	35.85	33.02
CBU_2077	269	41.2667	48.33	39.41	36.06
CBU_2078	349	40.21	54.15	34.67	31.81
CBU_2079	135	41.4833	45.19	43.7	35.56
CBU_2080	321	44.03	54.21	37.69	40.19
CBU_2081	393	40.6267	50.89	37.4	33.59
[truncated: 16 more rows]

## Sheet: Final pp(G)pp all
Genes down regulated	start position	-10 to TSS sequence	%GC percent
CBU_0354	320424	TAAAATTTAA	0
CBU_0752a	693440	AATTTTAATT	0
CBU_0987	936218	AAATAAAAAA	0
CBU_1195	1139355	ATTAAATTAT	0
CBU_1416	1365921	AATAATTTAA	0
CBU_1618	1558036	TAAAATTATT	0
CBU_1664	1600057	ATTAAATTAT	0
CBU_1847a	1775064	TTAATATTTA	0
CBU_0596	544063	AAATATTAAT	0
CBU_0732	677149	TAAATAATAT	0
CBU_0936	886418	TATAATTTAA	0
CBU_0953	904648	ATTTATTTAT	0
CBU_1020	964674	TTTAAAAATT	0
CBU_1041	984476	ATATTATTTT	0
CBU_1045a	988196	AAAAAATAAT	0
CBU_1522	1471144	AATTTTAATT	0
CBU_1613	1555956	TTAATAATTT	0
CBU_1705	1638311	AATTAAAAAA	0
CBU_1977	1889003	TTATTTTTTA	0
CBU_0008	8716	AATGTAATTT	10
CBU_0053	49486	TGTAAAAAAA	10
CBU_0058	53896	TAAAAAGAAA	10
CBU_0128	116369	AATATTGTAA	10
CBU_16SA	165579	GTTATATTTA	10
CBU_0182	170459	GAATTTATTT	10
CBU_0191	177540	AAGTATTATT	10
CBU_0217a	201949	TTTTTTAAAC	10
CBU_0316	282596	TGATAAAATT	10
CBU_0317	283478	CTATTAATTT	10
CBU_0446	393037	GTAAAATTAT	10
CBU_0478	419337	TTATAGTATT	10
CBU_0488	429066	TAATTAAGAT	10
CBU_0582	534168	GTTATTTTAT	10
CBU_0598	545856	ATAATGAAAT	10
CBU_0605	550607	AATTTTTGTA	10
CBU_0661	605024	AAAGATTAAT	10
CBU_0813	764518	ATAGTTTTTA	10
CBU_0820	769444	GAATATTTTT	10
CBU_0842	795879	TTAAGTAATT	10
CBU_0854	809343	TAATGAATAA	10
CBU_0861	817234	ACATATTTAT	10
CBU_1017	962236	AGTTTTTTTT	10
CBU_1105	1052361	AGAAAAAAAT	10
CBU_1212a	1156864	AATTCTTTTT	10
CBU_1280a	1230040	TAAATGTATA	10
CBU_1286	1239350	AAATATATTC	10
CBU_1291	1246055	TTTTAAGAAA	10
CBU_1369	1318270	ATTCTAATTT	10
CBU_1541	1490823	TAGAAATTTT	10
CBU_1569	1516105	AGTAAAAAAT	10
CBU_1653	1591837	TTTTATGAAA	10
CBU_1653a	1592465	TTCTAAAAAA	10
CBU_1794	1725445	ACTTTTTAAA	10
CBU_1799a	1733270	ATTTATTGAA	10
CBU_1845	1773391	TATTGATAAT	10
CBU_1870	1798072	TTTTAAATGT	10
CBU_1985	1895554	GTTTTTTATA	10
CBU_2014	1921123	GATTTTTTTA	10
CBU_0014	14479	TATGAATAAT	10
CBU_0103a	99512	GTATTAAAAT	10
CBU_0180	163677	ATTATGATTA	10
CBU_0296	263887	TTTAAATACT	10
CBU_0326	293257	TATATTTTAG	10
CBU_0351	318123	AATAGTTTTA	10
CBU_0367	332346	ATTCTTTTTT	10
CBU_0425	378718	TATTGATTTA	10
CBU_0512	453430	AATAAATCAA	10
CBU_0565	515353	GTAATTAATT	10
CBU_0698	646977	TTTTTTACTT	10
CBU_0707	656064	TTATTTTTTC	10
CBU_0753	696788	GTTTTTATTT	10
CBU_0793	742817	TAATAATCAT	10
CBU_0794	744258	TTTTTTATTC	10
CBU_0823	774118	ATTAAGTTTT	10
CBU_0824	775531	AGTAAAAAAT	10
CBU_0873	826360	TTAAATGTTA	10
CBU_0913	862518	TTTATCATAT	10
CBU_0915	864383	TATAACATTT	10
CBU_0931	881993	TTTTTGATTT	10
CBU_0949	898245	TAAATTGAAT	10
CBU_0986	936184	TTAAATTTAG	10
CBU_1013a	960339	AAATCAAAAT	10
CBU_1024	970112	TTTTTCTTAA	10
CBU_1028	972926	ATTTTTTTAC	10
CBU_1080	1024755	TATTACTTTA	10
CBU_1087	1032989	TTAAAATTTC	10
CBU_1121	1065762	TACATTTTAA	10
CBU_1175	1117749	TAAATTTATC	10
CBU_1298	1254128	AATGTATTTT	10
CBU_1308a	1260480	TGATATTAAT	10
CBU_1408	1359292	AAGAATAAAT	10
CBU_1427a	1379435	AAAATCATAA	10
CBU_1491	1444008	TTATACAAAT	10
CBU_1615	1557743	TGATTATTTT	10
CBU_1730	1665163	TTTTAATTCT	10
CBU_1735	1671756	TCAAATTATA	10
CBU_1764	1696141	GAAAAAAATA	10
CBU_1769	1700763	TTTTTAAACT	10
CBU_1806a	1737901	AACAATATTT	10
CBU_1822	1753193	TTTAAGATTA	10
CBU_1833	1762811	TTTTTTGATA	10
CBU_1853	1781774	TTTTATGTAA	10
CBU_1859	1788247	AAAAAGAAAT	10
CBU_1866	1796556	TAATGATTAA	10
CBU_2014a	1923004	TATGTTATTA	10
CBU_0011	11893	AATTGTTTGA	20
CBU_0065	60867	GAGAAAAAAT	20
CBU_0127	116182	GAAATTCAAA	20
CBU_0130	117802	TTAAAGAGAT	20
CBU_0147	132760	ATGATATACA	20
CBU_0168	153755	AAGAAAAGTA	20
CBU_0181	163701	ATTTAACGTA	20
CBU_0208	193705	AGAAAATCAA	20
CBU_0218	202174	GATATTCAAT	20
CBU_0224	207752	GAGAAAATTT	20
CBU_0233	220265	TATTAGTGAA	20
CBU_0259	235526	CAAAATTAGA	20
CBU_0274	245376	TTAAGCAAAA	20
CBU_0276	249676	ATTTCGTAAA	20
CBU_0297	263915	GAAGATTTTT	20
CBU_0306	273549	AACTTGAAAT	20
CBU_0319	284817	GTTATAAGTA	20
CBU_0327	293341	TTCACAAAAA	20
CBU_0375	338887	AGCATTAATT	20
CBU_0378	340247	AGGTAAATAT	20
CBU_0388	348584	GTAATGAATT	20
CBU_0440	389688	GATAAATTAC	20
CBU_0465	409709	GGATTAAATA	20
CBU_0476	417287	AGTCATTAAT	20
CBU_0487	428111	ATAAAACCAT	20
CBU_0509	450030	TGATAATAAG	20
CBU_0528	473018	ATAACCTAAT	20
CBU_0539	481875	AGAACAAAAT	20
CBU_0574	526216	GAAATCATAA	20
CBU_0588	539484	ATAAACTATC	20
CBU_0622	568273	AGCATTAAAA	20
CBU_0676	617333	AGGATTATTT	20
CBU_0699	647180	GTATCATAAA	20
CBU_0707a	656111	GCATTTTTAA	20
CBU_0763	704512	AAAGCTAATA	20
CBU_0786	726996	GAGTTTATTT	20
CBU_0814	765359	ATATGGTTTT	20
CBU_0837	788297	TTTAGATGAT	20
CBU_0863	819088	ACAGATTAAT	20
CBU_0874	826483	ACTATAAATC	20
CBU_0878	830363	TCTAAGTAAT	20
CBU_0886	838542	CTTTTTTGAT	20
CBU_0910	859205	AATACAAGAA	20
CBU_0918	866870	AGGATATAAA	20
CBU_0937	886730	AAAATATGAG	20
CBU_0948	897282	TTTAAAAGGA	20
CBU_0973	923486	TAATCATAAC	20
CBU_0993	941108	AGCATATTAT	20
CBU_1014	960466	AGATAACTTA	20
CBU_1023	966353	CCTAAATTAA	20
CBU_1042	984470	AGGTAAAAAA	20
CBU_1115	1059970	GAATTTCATT	20
CBU_1178	1120012	TGAAAATCTA	20
CBU_1187	1130465	GGTAAAAAAT	20
CBU_1198	1142253	TGAAAAAAGT	20
CBU_1234	1187356	TATAGTATGT	20
CBU_1235	1188801	TAATGACTAA	20
CBU_1243	1194822	AGTAAAAAAC	20
CBU_1259	1208729	ATTAAAAACC	20
CBU_1279	1228361	GTAACATTAA	20
CBU_1312	1263468	ATAAAATCGT	20
CBU_1328	1275011	TTTCATCTTA	20
CBU_1362	1311644	ATGTTTAAAG	20
CBU_1378	1328863	TCTATGAAAT	20
CBU_1405	1357889	TTTAGTTTAG	20
CBU_1459	1413736	ATTAGATCAT	20
CBU_1514	1466796	CATAGATATA	20
CBU_1552a	1499504	ACATTATCTT	20
CBU_1570	1517858	GAGTTTTAAA	20
CBU_1604	1549352	GAAATCATTT	20
CBU_1684	1616113	TAAATTTAGG	20
CBU_1780	1708215	TAAGTTTTGA	20
CBU_1804	1736099	GACTTTTAAA	20
CBU_1819	1750313	GAAATAGAAA	20
CBU_1827	1755811	TCATGATTTT	20
CBU_1843a	1772880	TAAAACTCTA	20
CBU_1956	1872810	AGGATAAATT	20
CBU_1974	1886459	TTTTTAGAGA	20
CBU_1986	1896316	AAACAATTTC	20
CBU_2011	1917713	AAGAAAGTAT	20
CBU_2032	1939403	GTCTTTATTT	20
CBU_2072	1975209	TACTAAAACA	20
CBU_0020	18126	TTACAACAAA	20
CBU_0024	22665	AAATTATTCC	20
CBU_0027a	26438	TCATTATCAT	20
CBU_0037	33276	TTATATTCTC	20
CBU_0040a	37983	ATACGTATAA	20
CBU_0051	49377	GTTTTAACAA	20
CBU_0063	58668	CTCAATTTAT	20
CBU_0101	96129	ATCTTTTCAT	20
CBU_0150	137082	AACACATTTT	20
CBU_0166	153058	ACGATATATA	20
CBU_0181a	165194	AAATAATGCT	20
CBU_0194	181207	GTGAATTTAA	20
CBU_0282	254551	CTTTAAAATG	20
CBU_0312	278678	ATTTTTTCCT	20
CBU_0371	335245	TGAGTAAAAT	20
CBU_0374	338232	AAGATTACAA	20
CBU_0407a	365791	GTTTTTTAAC	20
CBU_0486	427782	TTTTTAAACC	20
CBU_0507	449058	TTTTTTATGG	20
CBU_0508	449980	TGTTATATTG	20
CBU_0511	452366	ATCGTTTATT	20
CBU_0521	465040	AAAAACATTG	20
CBU_0571	521816	CTTTTTCTTA	20
CBU_0581	534095	GTTATAATAG	20
CBU_0603	550458	AATTATCTCT	20
CBU_0619	565820	AAAAACTCAA	20
CBU_0693	640770	AAACTCATTT	20
CBU_0705	654933	TATAATTCAG	20
CBU_0714	661333	TGAAGATTAA	20
CBU_0750	691022	AGAAATAATG	20
CBU_0755	699237	TTTTTACTCT	20
CBU_0757	701060	TTTAACAGTT	20
CBU_0778	721524	TTTTTATCTC	20
CBU_0777c	721960	ATTACTTTCT	20
CBU_0802	750014	TTAATGGTAA	20
CBU_0890	842666	GAAAAAAAGA	20
CBU_0925	875848	AACTTTTTTC	20
CBU_0946	895740	TTAAGGATAT	20
CBU_0980	931518	TTTTTTACTC	20
CBU_0994	941798	CTTGTAAAAT	20
CBU_1011	956825	GAATTTATTG	20
CBU_1028a	974433	ATTAATTTCC	20
CBU_1034	976893	AGTAATTCAA	20
CBU_1048	992578	TTTATTTACC	20
CBU_1055	999415	TTATATAGCA	20
CBU_1061	1006380	AATACCTTAT	20
CBU_1081	1025166	TTTTCAAAAC	20
CBU_1088	1034469	TCTTTTTTCT	20
CBU_1138	1081098	CCATTAATTT	20
CBU_1191	1136766	TTTTAAAACG	20
CBU_1215	1161056	AAACTTTTCT	20
CBU_1224a	1170906	AAAATAATCC	20
CBU_1250	1202100	ATGAATTTTG	20
CBU_1255	1207628	TGAATCATTT	20
CBU_1287	1242552	TAGTATTTCT	20
CBU_1295	1249555	AAAAAAGCTA	20
CBU_1310	1260838	TAAAAAAAGG	20
CBU_1316	1265610	TAACTGTTAA	20
CBU_1323	1271533	TTTATTTCTC	20
CBU_1366	1316078	TTCTAAGATA	20
CBU_1404	1357879	TTAGTTTAGA	20
CBU_1450	1402909	AAAGATAACA	20
CBU_1452	1409892	AAAATACTGT	20
CBU_1460	1414949	ACTTTATTAC	20
CBU_1461	1417724	AATGCAAAAT	20
CBU_1498	1452149	GAATTATAAC	20
CBU_1507	1460054	TCTTTTGAAA	20
CBU_1526a	1475581	AATGAGAATT	20
CBU_1562	1512096	TTATTTCTCT	20
CBU_1597	1543603	CTCAAAATTT	20
CBU_1600	1546610	ATTTTTTCTC	20
CBU_1612	1555697	ATTTCGATTT	20
CBU_1638	1578500	TTTTAAGTTG	20
CBU_1657	1595202	AAATTTGTCT	20
CBU_1675	1609640	ACTTTATTGA	20
CBU_1681	1614069	TCATAACTTT	20
CBU_1699	1632859	AACAAAATTC	20
CBU_1702	1636129	ACTATATTGT	20
CBU_1719	1649658	TAGTCATATA	20
CBU_1806	1737113	TTTAGCTATT	20
CBU_1826	1755804	GATTTTTTGA	20
CBU_1864	1793729	AATTAGAGTT	20
CBU_1877	1805564	AAATTAACCA	20
CBU_1899	1821161	TTTTTAGCTT	20
CBU_1936	1854988	TTCTGTTTAA	20
CBU_1972	1886279	CTATATAGTA	20
CBU_1973	1886449	TTTTAGAGAA	20
CBU_2007	1913956	AGTTAAATCA	20
CBU_2059	1967431	ACAATTTTCT	20
CBU_2086	1987175	AAGTTATGAT	20
CBU_0015	14556	AATAAGGTGA	30
CBU_0018	16901	GGTAGTAAAT	30
CBU_0037a	33230	CATTTCTTCT	30
CBU_0043	41407	AAGTGTTAAG	30
CBU_0044	42116	TAGGAGATAT	30
CBU_0057	53728	CTTAAACAAG	30
CBU_0065a	61292	GAGATCTAAA	30
CBU_0075	69001	ATACACTAAC	30
CBU_0077	71573	GGAGATTTTT	30
CBU_0081	73564	CTAAACTTTC	30
CBU_0111	103425	AGGTCAAATA	30
CBU_0115	106726	GTGGTATAAT	30
CBU_0123	112114	AATCCTTTAG	30
CBU_0133	120534	GTACTGAAAA	30
CBU_0162	147264	GTTAAAACCA	30
CBU_0176	157619	TTCGGTAATT	30
CBU_2096	168770	TGACAGAAAT	30
CBU_0183	172242	TACTGAAACT	30
CBU_0231	211325	AAAATGAGGT	30
CBU_0266	239721	AGGAGAAAAA	30
CBU_0280	252514	ATAACTAGGT	30
CBU_0283	254719	TTGGTAATCA	30
CBU_0330	296556	AAGATAATGC	30
CBU_0340	308186	TGAGGAAAAT	30
CBU_0357	324094	TAACTAGGTT	30
CBU_0377	339869	TAGGTGAAAA	30
CBU_0383	344088	AGTTATTGGA	30
CBU_0384b	346413	ATGTCATCTA	30
CBU_0395	358040	GAAAATTGCA	30
CBU_0400	362731	AGAGGTAAAA	30
CBU_0426b	381126	TGAAAAAGCA	30
CBU_0448	394433	CTAGATTCTA	30
CBU_0451	396962	GCAATATGTT	30
CBU_0455	400086	GAGGATTTTT	30
CBU_0473	416156	AGGAAAAACA	30
CBU_0474	416557	GAGAAATTAC	30
CBU_0481	421033	TTATCACGAA	30
CBU_0485	423944	GGGATTAATA	30
CBU_0505a	446054	AATCAAGCAA	30
CBU_0510	450387	GGGAAATTTT	30
CBU_0513	453557	AAGGATTGAT	30
CBU_0515	456167	GTGAATTATC	30
CBU_0519	462062	AGGAATTAAC	30
CBU_0522a	465582	TCATACGTAT	30
CBU_0533	477656	GTGACTTTTT	30
CBU_0537	481372	TGTAAAGTTG	30
CBU_0586	535521	CTAAAACGAA	30
CBU_0596a	544319	CAAGGTTTTA	30
CBU_0626	569797	GACAACTATT	30
CBU_0635	583288	GGAGATAAAT	30
CBU_0636	584821	GGAAATTCAA	30
CBU_0654	599933	GGAAATCATT	30
CBU_0665	607018	TCTAATTTCG	30
CBU_0669	610139	TTAACTTCCA	30
CBU_0671	612249	GGATAACAAT	30
CBU_0691	637404	GGAATGAAAT	30
CBU_0761	703762	CAAAACTCTT	30
CBU_0769	713761	GGAAGTTTAA	30
CBU_0781	722881	AGGATATTCT	30
CBU_0782	724097	CGGTTTTATT	30
CBU_0792	740711	TTTATGAGGT	30
CBU_0799	748218	TCATATCACA	30
CBU_0819	768696	AAAAAAAGCC	30
CBU_0828	777942	GGAGTAAAAA	30
CBU_0838	790067	GCATTTAGTA	30
CBU_0851	806380	GGTAATTACA	30
CBU_0860	816685	TTGTCGATAA	30
CBU_0880	831421	GGTAAAGAAT	30
CBU_0899	849879	GATAGGTATT	30
CBU_0932	882060	TAAACTGGAT	30
CBU_0943	892388	ATGTCTCTAT	30
CBU_0960	913674	AGGTATTTCT	30
CBU_1016	961969	TAGGTTAAAG	30
CBU_1031	974769	AAGAGAAAAG	30
CBU_1035b	978536	AAAAAACCCT	30
CBU_1058	1002918	GATTTTAAGC	30
CBU_1063	1007671	GGGTTATTTA	30
CBU_1072	1017271	GGTTATTTAC	30
CBU_1075a	1020878	TCATACGTAT	30
CBU_1150	1095052	AAGACTAATC	30
CBU_1158	1103871	GGATTGAAAA	30
CBU_1160	1105682	AAATCAGAAG	30
CBU_1161	1106926	TAAAACCCTA	30
CBU_1168	1110854	AGGTATTTCT	30
CBU_1176	1117997	AGGAAGAATA	30
CBU_1186b	1130104	ATGTCATCTA	30
CBU_1203	1146351	AGGAAATTTC	30
CBU_1208	1151258	AGTTTTAACG	30
CBU_1217	1161602	GAACTAAGAA	30
CBU_1224	1169324	TTATACTACG	30
CBU_1229	1179351	GTTAACAGTA	30
CBU_1233	1186391	CACAATATCA	30
CBU_1239	1190596	TTAGATCACT	30
CBU_1253	1204287	GGAGATTTTT	30
CBU_1256	1207660	CGTATTATAG	30
CBU_1260	1210764	GAATATCAAC	30
CBU_1264	1213554	TAAATGACGT	30
CBU_1267	1215856	ATTTCTCAAC	30
CBU_1269a	1219705	GCTGATTATT	30
CBU_1273	1223250	AAATAACAGC	30
CBU_1296	1249565	CAAAAAAGCT	30
CBU_1308	1258425	GCTTTGTTAA	30
CBU_1346	1294909	GCATTTTGAA	30
CBU_1388	1337773	TTAAGTTAGC	30
CBU_1390	1340248	TAAGGATTCT	30
CBU_1429	1379567	GAGTATTGAT	30
CBU_1458	1412209	CAACTTTGTT	30
CBU_1465	1419084	AAGAGTCATT	30
CBU_1472	1427545	ACATGACAAA	30
CBU_1484	1437348	GAGGATAATT	30
CBU_1493	1445840	AAAGGTCATT	30
CBU_1527	1475653	TTGACAATCT	30
CBU_1539	1489153	TCAAGTTTAG	30
CBU_1540	1490460	TTTCTTTGGA	30
CBU_1545	1493560	GGTAATAACA	30
CBU_1553	1499627	AGATTTTCTC	30
CBU_1556	1505256	AGGGTATTTT	30
CBU_1560	1508557	ATAACCCTTT	30
CBU_1570a	1518999	TCATACGTAT	30
CBU_1573	1520477	GAATCCAAAA	30
CBU_1590a	1537194	TCATACGTAT	30
CBU_1635	1575523	ATTCATAGAG	30
CBU_1659	1596377	CCTTATTCTA	30
CBU_1685	1616280	GGGAATTTTT	30
CBU_1686	1617723	GGAGAAAAAA	30
CBU_1701	1634514	GTATTACGTA	30
CBU_1725	1659823	AGGAAAATTC	30
CBU_1736	1671784	ACCTTTTCAT	30
CBU_1749a	1681101	GAAGAAACAT	30
CBU_1753	1684363	TGAGGAAAAT	30
CBU_1775	1705702	GCAAATCATT	30
CBU_1787	1718371	GAAAATAGGT	30
CBU_1818	1748815	GAGGTTAAAA	30
CBU_1831a	1762008	GTATTGAAAG	30
CBU_1876	1803534	TTGAAATACG	30
CBU_1890	1814037	CGATAAAACT	30
CBU_1909	1828489	AAAATAAGCC	30
CBU_1921	1838596	ATCTTTACAG	30
CBU_1930	1849038	TCATGCTTTT	30
CBU_1933	1850017	TCTATAATCC	30
CBU_1949	1866009	GAATGCAAAA	30
CBU_1951	1867762	AAAACCGTTA	30
CBU_1959a	1875965	TCATACGTAT	30
CBU_1978	1888985	AAATTTCGCA	30
CBU_1987	1897270	AGAAAATGGA	30
CBU_1998	1904012	TATCACTGTA	30
CBU_2044	1949465	ATCCTTAGAA	30
CBU_2079	1980877	TTAAGGCTAA	30
CBU_2083	1984295	GAAAAATACC	30
CBU_2095a	119	ATTTCTGAAC	30
CBU_0006a	8047	ATACGTATGA	30
CBU_0007a	8688	GCTTACATTA	30
CBU_0042	41383	AGCTTATCTT	30
CBU_0048	46627	TGAGTATAAC	30
CBU_0068	62994	ATACTAATCG	30
CBU_0073	68723	AATACTCGAT	30
CBU_0096	90968	TATTCACCAT	30
CBU_0161	146903	CTCTTTAAAC	30
CBU_0178	161150	GATGCTATTA	30
CBU_0185	174848	AAGTAATGCT	30
CBU_0189	177337	CGAATAGAAT	30
CBU_0198	187580	CTACTGAATT	30
CBU_0213	197560	ATGCTGATAA	30
CBU_0272	244293	GTAAAATCCT	30
CBU_0341	310164	CGATTATCTT	30
CBU_0352	319062	GGATGTATAT	30
CBU_0360	326926	TTTTCTATCC	30
CBU_0370	333980	AGATAATCCT	30
CBU_0384a	346366	ATACGTATGA	30
CBU_0392	357733	ATAGATTCTC	30
CBU_0418	372573	GGGTTTTATT	30
CBU_0419	373506	AAAATAGCCT	30
CBU_0436	388751	TACACTAACA	30
CBU_0447	394394	TTCTTTCTCT	30
CBU_0457	401095	GGTTTTGATT	30
CBU_0505	445782	GGTAGATTTT	30
CBU_0517	459990	AAGCGTTTAA	30
CBU_0547	497039	ATCGTTTTTG	30
CBU_0550	501142	TGTCCATTTT	30
CBU_0552	501968	CGGATTATTA	30
CBU_0554a	503456	ATACGTATGA	30
CBU_0560a	510503	TTAAGACCAT	30
CBU_0579	532844	AGGTTTGAAT	30
CBU_0632	581193	ATTTCTTTCC	30
CBU_0641	591484	GGATTTTGAT	30
CBU_0683	625990	TGTACAAAGT	30
CBU_0695	643447	TTATTTGAGC	30
CBU_0709	657486	TTGAAGTTAC	30
CBU_0722	669459	AACCTATTCT	30
CBU_0731	676121	TATCTCTTCA	30
CBU_0745	687617	GATATTTCTC	30
CBU_0805	754767	GATTACGTAA	30
CBU_0817	767844	TACAATCGAT	30
CBU_0822	771975	TTTAGTGATC	30
CBU_0881	833714	AAGATTTCTC	30
CBU_0881a	834729	TTGCCATAAA	30
CBU_0922	872931	TGAATTCCAT	30
CBU_0927	878348	TCTAAATTCC	30
CBU_0944	893417	TACTTTAAGG	30
CBU_0945	894629	TATTCAATCC	30
CBU_0955	906103	ACGTTATTTC	30
CBU_0963	915641	GCTATGTTAA	30
CBU_0972	923397	TGTTATCTTC	30
CBU_1007	953208	TTATCCTTCT	30
CBU_1018	963912	ATCTATCTCT	30
CBU_1019	964171	GCCTATTTTT	30
CBU_1043	985558	TTATTCTCTC	30
CBU_1064	1009367	GTTCTTTTCT	30
CBU_1065	1009949	ATAGTAGTCT	30
CBU_1085	1031381	TGCTTATAGA	30
CBU_1090a	1036014	ATACGTATGA	30
CBU_1091	1038433	CTATGCTATT	30
CBU_1094	1042930	GCTTAAACAA	30
CBU_1100	1048361	TTATTAGCGT	30
CBU_1107	1056857	ATCTCCTTAT	30
CBU_1113	1059858	GAATAAAACC	30
CBU_1119	1063937	TTAAATGGCT	30
CBU_1143	1086261	AATGTTACTC	30
CBU_1146	1089959	TCCATTTCTT	30
CBU_1157	1103746	TTGATATTGC	30
CBU_1172	1115340	GGGATATTAT	30
CBU_1186a	1130056	ATACGTATGA	30
CBU_1209	1154050	TATCGATATC	30
CBU_1226	1176802	GCAAGTATAA	30
CBU_1307	1258062	TTCAGTATCT	30
CBU_1311	1263306	TAAACTTCCT	30
CBU_1314a	1265150	ATCATTTGTC	30
CBU_1318	1266876	AAATGTTACC	30
CBU_1326	1274923	GATAGTAACA	30
CBU_1347	1297626	TTGAAAACCT	30
CBU_1361	1311436	TTGTTTTTCC	30
CBU_1370	1320475	TTTACTTTCC	30
CBU_1379	1330099	TTTTCACCTA	30
CBU_1386	1336986	CCTTCATATA	30
CBU_1397	1349931	AGTTTTCTCT	30
CBU_1403	1357534	TAAGAAGCAA	30
CBU_1406	1359138	CCTTTTGTTT	30
CBU_1448	1401525	ACCTTCTTAA	30
CBU_1464	1418779	AAATTCCTCT	30
CBU_1494	1448442	AGGAATCTTT	30
CBU_1508	1461708	TAGTACACTA	30
CBU_1525	1475433	AGATTTTCTC	30
CBU_1530	1481121	TATTCATCTC	30
CBU_1530a	1481459	CTTTTAGGTA	30
CBU_1542	1491285	TTTACTTCTC	30
CBU_1551	1499287	TAGCCTTAAT	30
CBU_1607	1552408	TTTTATTCGC	30
CBU_1614	1556408	TTCCTGATTT	30
CBU_1624	1563493	GATGACTAAT	30
CBU_1647	1586519	TTTAAAGACC	30
CBU_1656	1594271	TTTGGCTTAA	30
CBU_1658	1596328	CTATAGTGAA	30
CBU_1665	1602386	GAAAAAGAAC	30
CBU_1666	1604154	AATGTACTCA	30
CBU_1676	1611038	AGATGCATAT	30
CBU_1683	1615943	TAAAGGAATG	30
CBU_1689	1624043	TTTACCACAA	30
CBU_1692	1624966	ATATGGTAAC	30
CBU_1693	1626995	TGTTTTTCCT	30
CBU_1755	1685532	TCAGTTAACT	30
CBU_1761	1693082	TTTTTCCGTT	30
CBU_1772	1704878	AATTCCTGAA	30
CBU_1777	1706823	TCACATTAAC	30
CBU_1785a	1717059	ATACGTATGA	30
CBU_1802	1735762	TGTTACTATC	30
CBU_1811	1742797	GGAGTAAAAA	30
CBU_1824	1754541	ACCATTTGAT	30
CBU_1849	1777246	ATTGCCTTAT	30
CBU_1850	1777949	AATTAAGCAG	30
CBU_1863	1793370	TGCATATTTC	30
CBU_1896b	1820528	ATACGTATGA	30
CBU_1907	1828323	AAATCACCTT	30
CBU_1908	1828452	TTAGATAACC	30
CBU_1932	1849945	TCTCCATATT	30
CBU_1960	1875918	TAGATGACAT	30
CBU_1987c	1899877	ATACGTATGA	30
CBU_2020	1928685	AATATGCTGA	30
CBU_2021	1930042	AATATAGCCT	30
CBU_2027	1935058	ATAACTTCAG	30
CBU_2033	1940449	AACCGAAATT	30
CBU_2051a	1957817	AATAATGCTC	30
CBU_2057	1963913	TTTGTTCTCA	30
CBU_2066	1970582	TAATTTCTCC	30
CBU_2070	1974431	TAAATTCTCC	30
CBU_0001	140	TTGCACGATT	40
CBU_0021	18337	GGAGATAAAC	40
CBU_0056	51830	AGGCTAGTTT	40
CBU_0064	58753	ATAACGTGGA	40
CBU_0084	75638	TGGGTTATTC	40
CBU_0087	78747	CACTCATAGA	40
CBU_0094	86265	GAGACAAATC	40
CBU_0107	100029	GCTACTGATT	40
CBU_0175	156814	ATTCGGCTTA	40
CBU_0195	181388	TCAACACCTA	40
CBU_0196	182776	AGGTAACTCT	40
CBU_0199	187721	ATAGAGCCTT	40
CBU_0221a	205996	AAGAAGACAG	40
CBU_0270	241159	AGATGATTGC	40
CBU_0278	251008	GAGGCTTTAA	40
CBU_0293	259899	GCGTTACATT	40
CBU_0301	267505	GTGCAAAACA	40
CBU_0311	276910	GAGATTTGAC	40
CBU_0315	281850	AACTTGCGAT	40
CBU_0322	288902	AATGCTGTAG	40
CBU_0335	301737	GAGGATCTTA	40
CBU_0365	330772	ATTTGACCGT	40
CBU_0381	341677	AATTGATGGG	40
CBU_0390	353284	TGGAAAGACA	40
CBU_0413	369155	GCGTAAACTA	40
CBU_0416	371308	ACGATTGTGA	40
CBU_0417	371542	TAACGAGGTT	40
CBU_0432	384941	ATTAACCACC	40
CBU_0454	399357	GGAGAATACA	40
CBU_0458	401121	ATAGAGTTCG	40
CBU_0471	412731	AGACGGATAT	40
CBU_0472	414286	GAGATCATTC	40
CBU_0506	446222	GGAAGTTTTC	40
CBU_0518	459984	GGTTTCTGAA	40
CBU_0524	467155	ATAGAGGAAG	40
CBU_0532	477073	ACATACACTG	40
CBU_0535	480220	AAGAACGACT	40
CBU_0584	534906	GAGAACGAAA	40
CBU_0611	556738	TTGGGAAAAG	40
CBU_0624	568946	TCTGTCATTC	40
CBU_0629	572913	ATGAGGACAT	40
CBU_0634	581377	GGGATGTTAA	40
CBU_0688	634508	GGGAGTTTAA	40
CBU_0727	672203	TCACCTATTC	40
CBU_0751	691173	AAATGACGCT	40
CBU_0758	701120	CTAAAGTGAC	40
CBU_0767	711583	CGGTTCATTT	40
CBU_0768	712126	TCGAGATTCA	40
CBU_0770	714614	GATTCCTCTA	40
CBU_0771	716051	ACCATCAACT	40
CBU_0774	718636	GGAGATCAAA	40
CBU_0780	722166	GAAATAGCCT	40
CBU_0784	726619	TAACGGAGAA	40
CBU_0790	737435	AGGTTAGTGT	40
CBU_0818	768058	TCTTAGCGTT	40
CBU_0839	791303	TTCGATCTAG	40
CBU_0868	821430	ACTAAATCCC	40
CBU_0885	837344	GTGAGAGATT	40
CBU_0891	842764	GAGATTATCG	40
CBU_0909	858493	TCATTAGGCT	40
CBU_0917	865363	GGATATATCG	40
CBU_0921	871356	ACAGGCTTAA	40
CBU_0923	873052	GAATTAGACC	40
CBU_0970	920613	GAGTTTTCCT	40
CBU_0978	930350	GAGAGGTAAT	40
CBU_0981	931661	ATTTCCCTTC	40
CBU_0982	931822	AGCTAATACC	40
CBU_0985	934557	GGTAAATGCT	40
CBU_0995	941938	ACGACATACA	40
CBU_1008	953577	GGTTAACCAA	40
CBU_1015	961125	TTCTATCGGA	40
CBU_1027	970617	GGAAAAAGCA	40
CBU_1035	976940	AGGATCATCA	40
CBU_1044	986266	TGAACTCGAA	40
CBU_1046	988345	TGGTGTCAAA	40
CBU_1061a	1006431	TAGGGGATAA	40
CBU_1066	1010006	AGGAAGAAAC	40
CBU_1067a	1012620	CAATAATGCG	40
CBU_1069	1014588	GTGCGAATTT	40
CBU_1096a	1045129	GGTATGGAAA	40
CBU_1101	1048896	CTCTAAATGG	40
CBU_1120	1063960	ACCTTAGTTC	40
CBU_1122	1065790	AGGCAGATTA	40
CBU_1132	1074591	ATGGAGGATT	40
CBU_1140	1082006	ATATAGCCCT	40
CBU_1152	1096631	AAATCCCGAT	40
CBU_1159	1105255	CTCTTCACTT	40
CBU_1179	1121188	AGGAAAAAGC	40
CBU_1193	1136869	TACCAAGATC	40
CBU_1197	1141963	TTGTTTCCTC	40
CBU_1213	1157067	GCAGCTTATA	40
CBU_1214	1159107	AACTCTCACA	40
CBU_1267a	1217948	AGATAACACC	40
CBU_1335	1280843	AGTATGGAGA	40
CBU_1345	1293369	CCGTATAGTT	40
CBU_1349	1298083	GATCAAATGG	40
CBU_1376a	1327775	CTGAGATAAG	40
CBU_1489	1442553	ACAGACACTA	40
CBU_1516	1467682	GTCAGTAAAG	40
CBU_1531	1481477	GTAACTTTGC	40
CBU_1558	1507346	GATTAGTCCA	40
CBU_1565	1512191	AAAACCTCAC	40
CBU_1579	1527444	GAAAAACTCG	40
CBU_1581	1529542	CTCTCTTAAG	40
CBU_1593	1538657	GTTAGTTGCT	40
CBU_1601	1546941	ACTAAAGGTC	40
CBU_1652	1590619	GGGTTTAACT	40
CBU_1703	1636209	ACTATGGTAC	40
CBU_1711	1641089	GAAGCATAGA	40
CBU_1720	1649719	TCGTCATAAC	40
CBU_1723	1655090	TGGGTGATAA	40
CBU_1741	1675029	ACGTTAGACT	40
CBU_1751	1681753	GAGTTGGAAT	40
CBU_1756	1685579	GGCTAATTCA	40
CBU_1796	1729052	TGTTGAAGCT	40
CBU_1816	1747058	GGAGAAAAAC	40
CBU_1830	1759057	AGGAAACTTC	40
CBU_1847b	1776549	GGAGGATTTT	40
CBU_1851	1778164	CCTTCATTGT	40
CBU_1867	1796599	ATACGGGATT	40
CBU_1879	1806224	GAAGGATACA	40
CBU_1895	1817446	GAATTAGCTG	40
CBU_1903	1824556	AATTCCACCA	40
CBU_1910	1829381	GGAATAGATC	40
CBU_1913	1830769	AAGTTGGCAA	40
CBU_1922	1838882	CTCGCTATTA	40
CBU_1952	1867944	GGATTATTCG	40
CBU_1955	1871168	GCTTTAACGT	40
CBU_1962	1877423	GGAATTAGAG	40
CBU_1995	1902050	GGGATTGAAT	40
CBU_2002	1907922	AGATAAACCG	40
CBU_2024	1931840	TAGGTCATTC	40
CBU_2030	1936877	GGATGCTTTA	40
CBU_2034	1940561	ACTCACTCAA	40
CBU_2041	1947156	AGGGCTTAAA	40
CBU_2062	1967713	ACACCTTAAG	40
CBU_2084	1985305	CCCGAAAAAA	40
CBU_0023	22331	AAGAGACTCA	40
CBU_0026	23692	GATGATGATC	40
CBU_0030	28277	AGTTTCGCTT	40
CBU_0038	34457	GTTTTTCCTG	40
CBU_0050	48768	AATGACCCAT	40
CBU_0066	62226	AAAACCCTCT	40
CBU_0074	69002	GAATCAAACC	40
CBU_0102	96363	TATGCGTTGT	40
CBU_0110a	103264	ATAGGAATCC	40
CBU_0119	111513	CAGTTAATCC	40
CBU_0139	126833	TCAACCTCTA	40
CBU_0143	130946	GACTCATCTT	40
CBU_0156a	142882	CCAAACTTTC	40
CBU_0159a	145441	TACCTCGATA	40
CBU_0165	152283	AACGATTTCG	40
CBU_0184	173757	ACGACTAATC	40
CBU_0201	190041	TGCTTTAAGC	40
CBU_0277	250960	TCGATTTAGC	40
CBU_0291	258751	GACAATACTC	40
CBU_0292	259504	GAAGAAAGGA	40
CBU_0291b	259885	TAAGCGTTAC	40
CBU_0337	304303	GGTTATACTC	40
CBU_0344a	313311	CGATTTTCCA	40
CBU_0358	325612	AGTAGAGTCT	40
CBU_0372	336712	GAAAATCGTC	40
CBU_0382	344022	GATTCCACAT	40
CBU_0415	370990	TCGCTAGTTT	40
CBU_0424	377259	CGATTATTGG	40
CBU_0434a	387351	TTGTGGGTAA	40
CBU_0456	400830	CTTTTTCTCC	40
CBU_0468	411476	AACGAAAGTC	40
CBU_0477	419317	ACCACCAAAT	40
CBU_0503	443404	AGTCTAACCT	40
CBU_0504	445045	AGATCGTTGA	40
CBU_0536	481347	AAAGCCCTAA	40
CBU_0555	503753	GAAAACGATG	40
CBU_0562	512175	ATTAACCCCA	40
CBU_0621	568081	TGTGTTTTCC	40
CBU_0672	615284	TCTCTTCTCT	40
CBU_0694	642009	TGAGGTACTA	40
CBU_0724a	671952	GCTTTTCTCA	40
CBU_0724c	672070	TTAACCTGTC	40
CBU_0766	711285	AACGCAAAGT	40
CBU_0783	726489	AGGTCAAGTA	40
CBU_0876	829947	GCGTATTTAG	40
CBU_0883	835255	AGAACTTACC	40
CBU_0889	841926	AATAAGAGCG	40
CBU_0908	858440	AAGGTGAAAG	40
CBU_0911	860325	TCCTTTTTGC	40
CBU_0919	870022	GTTGGTGAAA	40
CBU_0946a	896913	TTGTCGAACA	40
CBU_0956	906902	TGTGTTACCT	40
CBU_0958	912265	TCAAATTCCC	40
CBU_0989	940879	TTATAACCCC	40
CBU_0998	944601	TTACTACTCC	40
CBU_1001	947921	AAGGGGTTAA	40
CBU_1071	1017106	GGTATTTCTC	40
CBU_1116	1061397	CTTTTTCTCC	40
CBU_1134	1076016	TTGTGCTAAG	40
CBU_1138a	1081538	CAGATGAACT	40
CBU_1144	1086641	TAAACACCTG	40
CBU_1164	1110527	ACTAACAGCT	40
CBU_1171	1113886	TCCTGGTATT	40
CBU_1184	1126249	AATAAGCTCC	40
CBU_1200	1144244	TAAGAGATGC	40
CBU_1207	1151033	AAAAGTAGCC	40
CBU_1210	1156735	GAGTAATTCC	40
CBU_1222	1168142	TCTATGCCAT	40
CBU_1231	1186112	ATTAACCCCT	40
CBU_1241	1193267	TTTCTCTCCT	40
CBU_1242	1194688	TATTCTGGCT	40
CBU_1258	1208593	TGTAAACCTC	40
CBU_1269	1219667	TTTTCACCTC	40
CBU_1272	1222977	AATCACTACC	40
CBU_1280	1229818	AATGTGGGAT	40
CBU_1314	1264690	TCTCTACAAC	40
CBU_1329	1276360	ATTTCACCCA	40
CBU_1334	1280342	ATGGAGGATA	40
CBU_1338	1287566	GGTTCCTTAA	40
CBU_1342	1291696	AATACCTCTC	40
CBU_1367	1318071	TTTGACACCA	40
CBU_1371	1321348	CTTCTATCCT	40
CBU_1375	1326119	CGTGCTAATA	40
CBU_1389	1339968	CGACTCTATT	40
CBU_1393	1346683	ACGCTTAGTT	40
CBU_1413	1363907	GAATCCTACT	40
CBU_1415	1365850	GTCAATAGCT	40
CBU_1425	1373391	GGTTTTTCTC	40
CBU_1434	1386668	TACCTTACCT	40
CBU_1451	1405282	ATACTAACCC	40
CBU_1457	1412027	AAACGATCTC	40
CBU_1458a	1413638	GATTAAGTGC	40
CBU_1471	1427343	TACAAATCCC	40
CBU_1476	1432164	ATTTCAGACC	40
CBU_1485	1439308	TATTGGCAGA	40
CBU_1505	1457236	AGTTGCTCAA	40
CBU_1506	1457809	AAAAACCCCT	40
CBU_1521	1470969	TTACGCTAGT	40
CBU_1529	1479117	AGCGTCAAAT	40
CBU_1543	1492165	TATCTTGCCT	40
CBU_1588	1535295	GGTTTCTCAT	40
CBU_1606	1551977	CCTCTAAAAG	40
CBU_1608	1555420	AGTTACCTCA	40
CBU_1663	1599986	AAAGGGAATG	40
CBU_1699b	1634397	GATTGTATCG	40
CBU_1706	1638971	AATAACCTCC	40
CBU_1707	1639101	ACATCTCTCT	40
CBU_1716	1646145	CCCTTAAAGA	40
CBU_1716b	1647538	TTTCTCCGTA	40
CBU_1722	1655008	CGAGTATCTT	40
CBU_1724	1659234	TACACCGAAA	40
CBU_1724a	1659813	GGAAAATTCG	40
CBU_1739	1674766	TAAGTCACAG	40
CBU_1740	1675015	TCTACGTTAG	40
CBU_1749	1680966	GAATCCAAGA	40
CBU_1757	1689328	AAAAACCTCC	40
CBU_1758b	1690855	TACCGCAAAA	40
CBU_1762	1694518	TCATTGCTCA	40
CBU_1815	1746986	GGAGATATCT	40
CBU_1828	1758243	CAGGAAATGA	40
CBU_1855	1782904	AGCGTATAAG	40
CBU_1860	1790506	GTAGCCTATT	40
CBU_1878	1806128	TTATTGCGCA	40
CBU_1881	1807439	AATACTTGCC	40
CBU_1894	1817202	TAACGGTGTT	40
CBU_1896	1818959	CCAAAAGAAG	40
CBU_1916	1835516	GAAAGGAATC	40
CBU_1968	1884250	AATACCGACT	40
CBU_1997	1903824	GAACTCTCAA	40
CBU_2001	1907891	TCACTATCGA	40
CBU_2028	1936013	TGGTGCATTT	40
CBU_2029	1936739	TTTTACCTCC	40
CBU_2050	1957451	TTTTAGTCCC	40
CBU_2056	1962747	GAGACATGTT	40
CBU_2058	1965662	GCATGGAATT	40
CBU_2061	1967706	CTTAAGTTGG	40
CBU_2068	1973273	ACTGATTTCC	40
CBU_2078	1980567	AGCAATACCT	40
CBU_2087	1987689	TGTAAATCCC	40
CBU_0006	6684	GCCCAATGAA	50
CBU_0008a	9006	AGGAGATGTC	50
CBU_0032	29546	ATTACCCCGT	50
CBU_0040	36620	GCCCAATGAA	50
CBU_0062	55870	GGGTTTTCCA	50
CBU_0069	63382	GATCTCTGCT	50
CBU_0079	72540	CGGAGAAACT	50
CBU_0088	80859	GAAAAACGCC	50
CBU_0089	81688	ATGCTTCCAC	50
CBU_0090	82485	CAGTGGTGAA	50
CBU_0098b	93486	TGTAGCCTGT	50
CBU_0106	99613	TGAGCAAGGA	50
CBU_0114	106086	GAGTTAAGCC	50
CBU_0135	122082	CCATCCTGTT	50
CBU_0140	127015	CAGGGAGATT	50
CBU_0144	131079	GGCTGATTGT	50
CBU_23S	167577	AGGGTTGCAT	50
CBU_5SB	171960	TTTCACCGGT	50
CBU_0193	178601	ATGGGATGCT	50
CBU_0202	190097	TCAGTGAGGT	50
CBU_0209	194626	ATTGGGCTAC	50
CBU_0214	197944	TGGGGGTTTT	50
CBU_0221b	206314	GGTCATCTTC	50
CBU_0275	248550	CAATAGAGGC	50
CBU_0286	255663	GCGGAAAGTA	50
CBU_0338	304467	TGCTCGGAAA	50
CBU_0344	311577	TATCCCCGAT	50
CBU_0355	322077	GGGAGAAGTT	50
CBU_0384	345003	GCCCAATGAA	50
CBU_0385	346685	AGCAGAGGAT	50
CBU_0396	358839	AAGGCGCATA	50
CBU_0398	362161	TCCAATCTGG	50
CBU_0402	363394	ACCACACACA	50
CBU_0426a	380654	ACGAAGCGAA	50
CBU_0430	382593	AGGCAGTGAT	50
CBU_0467	410379	AGTTACACCG	50
CBU_0491	432883	GGAGAAGAGA	50
CBU_0501	441228	TTCATCTGGC	50
CBU_0502	441373	AAAGCTGACC	50
CBU_0516	457584	TAAGTCTCCC	50
CBU_0522	465216	CTCTTGGAAG	50
CBU_0538	481714	GCTCCTTAAG	50
CBU_0545	493610	ACGCTGGAAA	50
CBU_0554	502093	GCCCAATGAA	50
CBU_0580	532969	AAGCGCTTGT	50
CBU_0587	539081	AGGACGCTAA	50
CBU_0600	547417	GAGGTTTCCT	50
CBU_0630	576126	AGATCGCTGA	50
CBU_0631	576860	ATACGGGGAA	50
CBU_0642	591520	GGCTTGTTGT	50
CBU_0649	596545	GAGATCACTG	50
CBU_0664	605781	GAGCTTGATC	50
CBU_0670	610563	CACTTGTGGT	50
CBU_0684	626329	GGAAGAAGGA	50
CBU_0685	628192	GTTAAGCCAG	50
CBU_0686	631758	AGCTGTTGCT	50
CBU_0687	632485	GGAATCCATG	50
CBU_0702	651484	GATAGCCGTT	50
CBU_0716a	663625	GCCAAGGAAA	50
CBU_0737	679226	CCACGAAAGA	50
CBU_0764	705123	GGGATTTCTC	50
CBU_0807	755036	GTGGTCCTTA	50
CBU_0810	760212	GGAGAATAGC	50
CBU_0846	800503	AGGACTAACG	50
CBU_0847	801866	AGAGGAAGCA	50
CBU_0850	805231	TCCCTTATGG	50
CBU_0877	830133	GGATACTGCA	50
CBU_0884	835524	GAGGTAAAGC	50
CBU_0901	850895	TAATGGGCGT	50
CBU_0920	870210	AGAAGGCCTT	50
CBU_0939	889062	CGCTTAATCG	50
CBU_0964	915645	ATGGCAAGCT	50
CBU_1002	948044	TTTCCCAACC	50
CBU_1012	957249	GGAGGTTCAA	50
CBU_1021	964833	AGTTCCCTAC	50
CBU_1090	1034651	GCCCAATGAA	50
CBU_1092	1038475	AGCCAATGAG	50
CBU_1145	1086677	CTGACGGTAA	50
CBU_1147	1090311	CCCTTGACTT	50
CBU_1169	1112550	GAGAGCGAAA	50
CBU_1173	1115568	AGAAGGCCTT	50
CBU_1183	1125097	CCTGACATTC	50
CBU_1186	1128693	GCCCAATGAA	50
CBU_1194	1137857	AGCTGCTCAT	50
CBU_1217a	1163350	GCCCAATGAA	50
CBU_1263	1213148	GAGGGGTAAT	50
CBU_1277	1227098	GTGCCAATGA	50
CBU_1284	1236614	GGGTATATCG	50
CBU_1302	1255226	AGGAGCTTCT	50
CBU_tmRNA	1259242	GGTGAAGTTC	50
CBU_1316a	1265634	ACGGTAAGTG	50
CBU_1364	1314215	AAAAACGCGG	50
CBU_1373	1322174	TATAAGCGCC	50
CBU_1376	1326197	TAGGTGCTCT	50
CBU_1391	1340814	GGAAACCCTT	50
CBU_1426	1373376	GCTCCAATAG	50
CBU_1477	1432292	GGAGAAAACC	50
CBU_1492	1444367	GAGCTTGATC	50
CBU_1517	1468222	AGATAGCAGC	50
CBU_1523	1471347	AGAGGCCTTT	50
CBU_1555	1504001	GAGCTTGATC	50
CBU_1561	1508765	TTGCCAAGGA	50
CBU_1574	1521788	GGAGAGATTC	50
CBU_1641	1581517	GAGGGTCTTT	50
CBU_1690	1624269	CTTCTCGAAC	50
CBU_1699a	1633010	GCCCAATGAA	50
CBU_1708	1639188	GGAACTCCTA	50
CBU_1712	1641294	GGAGAGTGTT	50
CBU_1716a	1646136	GCCCAATGAA	50
CBU_1731	1665192	GGGATGCTTA	50
CBU_1752	1683051	AACGAGTACG	50
CBU_1763	1694676	TAGAAAGGGC	50
CBU_1774	1705094	CAGCGCTATT	50
CBU_1785	1715696	GCCCAATGAA	50
CBU_1788a	1720950	ATCAGCGACA	50
CBU_1790	1722228	AGATGCCAGT	50
CBU_1803	1735952	AAAGGAGCTC	50
CBU_1814	1744137	AGGGAAATCC	50
CBU_1823	1753253	GGAGGGAAAT	50
CBU_1825	1754604	GGCCAAGAAA	50
CBU_1829	1758250	CCATCAGGAA	50
CBU_1834	1762841	GGATTCGCTT	50
CBU_1840	1769744	AGAGTAACCC	50
CBU_1862	1790541	AATTCACGCG	50
CBU_1874	1800801	GGAACTAACC	50
CBU_1882	1807482	GGAATGGAGA	50
CBU_1896a	1819165	GCCCAATGAA	50
CBU_1917	1836042	GAGTTGCCTT	50
CBU_1930a	1849302	GGACTTGTGT	50
CBU_1983	1894532	CTGTTGAGAG	50
CBU_1984	1895135	GGAGCTTGAA	50
CBU_1987b	1898514	GCCCAATGAA	50
CBU_1991	1900067	GAGACTCACT	50
CBU_2017	1923862	TGATAAGCCC	50
CBU_2037	1941952	GGGAAACATC	50
CBU_2054	1959158	CTTCGGTACA	50
CBU_2080	1981362	GGAAAAAGCC	50
CBU_2088	1988102	AAGCGAGGAA	50
CBU_0012	12959	TGTTGCTCCA	50
CBU_0025	22883	TTACGCACAG	50
CBU_0031	29314	TTGTCACTCC	50
CBU_0039	36571	CGCGACATTA	50
CBU_0045	43528	GGGAATTCCT	50
CBU_0049	47973	GATTGACTGC	50
CBU_0110	103020	CCAGCTAACA	50
CBU_0146	132760	TGCCGTCTAT	50
CBU_0151	137943	TGGTTAGCCT	50
CBU_0164	151224	TTTACCCCGT	50
CBU_0173	156106	AGGGATTCCT	50
CBU_0174	156677	CGATTTACCC	50
CBU_0279	252452	AGCAAGAGTG	50
CBU_0299	266511	CTCTATGGGT	50
CBU_0314	281785	GAGAAAGGCT	50
CBU_0321	288708	TACGGCGTAT	50
CBU_0339	307955	GTCAAACTCG	50
CBU_0347	316362	TGCTCCTGAT	50
CBU_0379	341457	CCTTTTCTCC	50
CBU_0380	341599	CCTTGTGGAA	50
CBU_0409	365958	GCTTCCTGTA	50
CBU_0412	368795	TTTCCCCGAT	50
CBU_0431	384834	AAGCTTCTGC	50
CBU_0463a	409726	GGAGTCATTG	50
CBU_0470	412395	ATACCGAGGT	50
CBU_0480	420939	AAAAGCCCGA	50
CBU_0489	430899	GGAAGGATAG	50
CBU_0490	432739	GGCCCTTAAA	50
CBU_0523	466945	TTCATTGGGC	50
CBU_0559	508633	AGTTGGCTAG	50
CBU_0566	516661	AGTGCCTCTT	50
CBU_0570	521176	AAGGTCTCCT	50
CBU_0585	535469	AGAAGAGGCT	50
CBU_0618	565276	ATGCCGCTAA	50
CBU_0627	572132	CTTAAGGGAG	50
CBU_0637	586494	GGGAAAATCC	50
CBU_0660	604626	ACTACGAACG	50
CBU_0697	645785	ATGCAGATCC	50
CBU_0706	655660	TCTGCTTCTC	50
CBU_0711	657937	TGGCTTGTAG	50
CBU_0736	678937	TCAAGTCTCC	50
CBU_0760	703546	TGTGCAGATG	50
CBU_0798	748194	GATGTGGTCA	50
CBU_0806	754978	TTACTGGGAG	50
CBU_0808	758969	GTTGTCGTGT	50
CBU_0845	800445	GTTGTGGGAT	50
CBU_0853	809318	CCGTCATTCA	50
CBU_0871	825043	ACGAAACCTC	50
CBU_0905	855878	GGCACTTTCT	50
CBU_0928	878970	ATTTCCTCGC	50
CBU_0968	920495	GGCATTCCTT	50
CBU_0979	931150	CCTTTTCTCC	50
CBU_1067	1012554	GGCTAGACTA	50
CBU_1075	1020658	ACCTTCACCT	50
CBU_1076	1022241	TTCATTGGGC	50
CBU_1084	1030126	CCTGAACTTG	50
CBU_1098	1047008	TTTTACCCCC	50
CBU_1103	1051056	TTTCCTGCTC	50
CBU_1112	1058474	CTCTCAAGTG	50
CBU_1131	1074496	AGGCAGATCA	50
CBU_1162	1108688	AACGTCCCTT	50
CBU_1182	1124895	CGAGGGATTA	50
CBU_1201	1145319	AGGCGCTATT	50
CBU_1216a	1161326	AGCGTGGTTT	50
CBU_1223	1169284	TTGTCTCCTC	50
CBU_1245	1199069	TGAGGTTCTC	50
CBU_1249	1201823	ATCGATCGCA	50
CBU_1270	1221185	TTCATTGGGC	50
CBU_1271	1222823	GTTCCCGTAT	50
CBU_1290	1245889	GTTCTCTTCC	50
CBU_1293	1248804	TGATGGGACA	50
CBU_1300	1254621	CGGGGTAATA	50
CBU_1317	1265893	CTTTCATGGC	50
CBU_1330	1277695	ATTTCACCGC	50
CBU_1339	1288321	TCCTTGTTCC	50
CBU_1353	1304910	TGTGTTCTCG	50
CBU_1372	1322073	AATAGGCTGC	50
CBU_1380	1331945	AAGGCTTCCT	50
CBU_1388d	1341974	ACAACTGGCT	50
CBU_1412	1363105	CGATAATCCC	50
CBU_1414	1364742	CGCCTTAAAC	50
CBU_1462a	1417934	TGTTTCCCGT	50
CBU_1479	1433888	TCCTTGCTCT	50
CBU_1481	1434912	CGAGAAAGAG	50
CBU_1488	1442396	AGACTCATCC	50
CBU_1570b	1520362	TTCATTGGGC	50
CBU_1590b	1538557	TTCATTGGGC	50
CBU_1617	1557882	ATACAGGTCG	50
CBU_1623	1563064	GCAATCAACG	50
CBU_1634a	1575407	GTCAATACCC	50
CBU_1636	1577210	CTGTTTTCCC	50
CBU_1639c	1581400	TTCATTGGGC	50
CBU_1649	1589509	TCATGCTAGC	50
CBU_1662	1599794	TCATCCTCGA	50
CBU_1671	1607010	GGAGAAAGCT	50
CBU_1677	1611542	AAACTGCCCT	50
CBU_1687	1622403	TTAGAACCCC	50
CBU_1745	1678913	ATCAGCTCAG	50
CBU_1767	1699560	TTACTACGCC	50
CBU_1784	1715572	ATCAAGGGCA	50
CBU_1789	1722048	GGATAACTCC	50
CBU_1792x	1725346	ACCTCACAAG	50
CBU_1795	1729001	ACGCGACTAA	50
CBU_1801	1735100	TCCTATAGCC	50
CBU_1846	1774579	ATACACTGCG	50
CBU_1847	1774942	GAGAACCTCA	50
CBU_1867a	1797044	GAGTGGGTAA	50
CBU_1911	1830432	GGGAATCCAA	50
CBU_1937	1856441	CTGGCTTCTT	50
CBU_1959b	1877328	TTCATTGGGC	50
CBU_1966	1882664	GTTACCTGTC	50
CBU_1994	1901854	ACTTTGACCC	50
CBU_2013	1920800	GATTGACCTC	50
CBU_2026	1934722	TTCATCTCCC	50
CBU_0060	54234	AGGACGTGCT	60
CBU_0085	77808	TGGGGTCGAT	60
CBU_0089a	81905	TGCATCTGCG	60
CBU_0098a	93033	AAGCCGTAGG	60
CBU_0131	118036	GACCACGCTT	60
CBU_0167	153046	GTGGCTTGGA	60
CBU_0205	190941	GAGTTCCGGT	60
CBU_0206	192424	GAGAGGGACA	60
CBU_0211	196006	CGAGGGGTTA	60
CBU_0216	200501	GGGAGCTAGT	60
CBU_0220	204884	TTGAGGGCGT	60
CBU_0281	253703	GGACGAAACC	60
CBU_0309	274678	AGGGTAACCC	60
CBU_0312a	278988	CTGGATTCCC	60
CBU_0342	310148	TTCGGTCACG	60
CBU_0343	310601	AGGAGGGGTA	60
CBU_0411	368162	AGTAGCCCGT	60
CBU_0433	386294	AGGAGACCCT	60
CBU_0437	388985	GGAGGAGAGA	60
CBU_0478a	419555	GAGGTCCTTG	60
CBU_0510a	450860	CTGGATTCCC	60
CBU_0577	529601	CTAGCGAAGG	60
CBU_0625	569281	GGGGTAAGCT	60
CBU_0646	594273	CGGAATCGCA	60
CBU_0650	597809	GAGGGGTTGA	60
CBU_0663	605572	CCCTAACTCC	60
CBU_0715	661506	GAGGTAGTGC	60
CBU_0803	750192	AGCGAAAGCC	60
CBU_0825	775635	GAACCGCGTA	60
CBU_0855	809500	AAATCGCGCG	60
CBU_0916	864577	TAGAGGGGCT	60
CBU_0964a	916841	GAGCGGTAGA	60
CBU_1056	999550	AACACACCCC	60
CBU_1086	1031508	GAGGTAGTGC	60
CBU_1097	1045373	AAGGCATCCG	60
CBU_1100a	1048457	AGTAGCCCGT	60
CBU_1104	1051234	GAGGTAGTGC	60
CBU_1123	1066703	TACGGGCTAC	60
CBU_1135	1076067	AGGATAGCGC	60
CBU_1199	1142823	TACCCCAGGA	60
CBU_1202	1145436	TAGGTGACCG	60
CBU_1261	1211608	GGAAGCGAAC	60
CBU_1279a	1229009	TTACCCACCC	60
CBU_1305	1256319	AGCCAACACC	60
CBU_1323a	1271991	CTGGATTCCC	60
CBU_1331	1277933	TACGAGCAGC	60
CBU_1409	1359670	GGTAACTCCC	60
CBU_1410	1360740	AGGAGCACGA	60
CBU_1420	1369219	GACTCCTCCT	60
CBU_1422a	1371624	CGATATCGCG	60
CBU_1511	1464210	AGGAGTCCCT	60
CBU_1536	1484958	AGACTTCCCG	60
CBU_1576	1523065	GAGGAATCCC	60
CBU_1590	1535813	CGCTAGTACG	60
CBU_1598	1543714	CTAACAGGGG	60
CBU_1619	1558446	GCAAGCAACG	60
CBU_1621	1559190	AGAACAGCCG	60
CBU_1639a	1579964	AGTAGCCCGT	60
CBU_1650	1589699	CGGAGAAGTC	60
CBU_1675a	1609679	ACAGCCACCA	60
CBU_1679	1612365	AGCTTAGGGG	60
CBU_1692a	1625039	AGCGCCGTAT	60
CBU_1695	1627148	TGTCTGCTCC	60
CBU_1733	1667895	AGGAGGAAGG	60
CBU_1738	1673605	AGTGGCAAGC	60
CBU_1758a	1689450	CGGCGTCATA	60
CBU_1760	1690932	CGGGATTTCC	60
CBU_1764a	1696140	GGAGTTAGCC	60
CBU_1798	1731254	GAATCACCCC	60
CBU_1812	1742864	TGGCGAATCG	60
CBU_1906	1827170	GCCGTATTCC	60
CBU_1938	1856529	CTCGAGCCTA	60
CBU_1947a	1865500	TGGCTGTGAC	60
CBU_1948	1865705	CTGGATTCCC	60
CBU_1958	1874503	AGCCTCGTGA	60
CBU_2071	1974507	GACCCTAGCA	60
CBU_2077	1978569	ATCGAGCACC	60
CBU_2093	1993272	GGATCGAGAG	60
CBU_0041	40220	GACTCACCTC	60
CBU_0103	97840	AGGCGGTCAT	60
CBU_0113	105933	CGATTTCCCC	60
CBU_0162b	151673	ACTCAGCCCA	60
CBU_0273	245124	CAGTGACCCT	60
CBU_0274a	248486	ACAGGCTACC	60
CBU_0307a	274692	TGGCCCCAAT	60
CBU_0316a	283271	GGGTGGGTAA	60
CBU_0369	333689	ACCTGGGGAT	60
CBU_0394	357947	CGTGTGCGAA	60
CBU_0410	367970	ATAGCCTCCC	60
CBU_0434	387034	GGGAATCCAG	60
CBU_0445	392722	ACTGTAGGGG	60
CBU_0534	480042	CCTTAAGCCC	60
CBU_0597	545803	CGGCGTATTC	60
CBU_0610	556558	TTGCGCTCAG	60
CBU_0668	610139	TGGCTGAACG	60
CBU_0675	617153	CTTGCGTCCT	60
CBU_0701	651347	TCTCCGGTTG	60
CBU_0716	663477	ACGATCCTCC	60
CBU_0724	670697	GCACTACCTC	60
CBU_0859	816561	GATCGCAGAC	60
CBU_0935	885656	GGCATCCTAC	60
CBU_0942	892312	CGCAACTCCT	60
CBU_0951	902334	CGACTGGCTA	60
CBU_0952	903234	GTGACCTCCT	60
CBU_0959	913529	AACCGCCCTT	60
CBU_1139	1081747	CACCTCAGCA	60
CBU_1151	1096495	CCGTAGCGAA	60
CBU_1185	1128181	GAGTGTCTGG	60
CBU_1206	1150863	TTCTCGCGCA	60
CBU_1238	1190451	AGATTCCCCC	60
CBU_1252	1204062	GGGTGCATTC	60
CBU_1282	1234840	GGAGGAATGG	60
CBU_1301	1255099	AGCGACTCCT	60
CBU_1304	1256292	ACCGTTCCGA	60
CBU_1336	1282903	CGGAGTAGTC	60
CBU_1343	1293274	GCAAGCTCCA	60
CBU_1422	1371544	GGAGACGCTT	60
CBU_1483	1437258	TAGGGACTCC	60
CBU_1510	1464061	GACTAGCCTG	60
CBU_1513	1466485	CGAGGGAGTA	60
CBU_1544	1493274	GCACTACCTC	60
CBU_1552	1499451	AGCTTTCCCC	60
CBU_1578	1527333	AATTGGGGGG	60
CBU_1589	1535724	AGCAGTCTCC	60
CBU_1639	1579808	CTTCCGGTCT	60
CBU_1669	1605460	AGTCCTGTCG	60
CBU_1768	1700083	ATGGCACCTC	60
CBU_1778	1707978	CGGTATCTCC	60
CBU_1786	1718334	GATAGACGCC	60
CBU_1821	1752487	CAGGCACAGA	60
CBU_1873	1800765	CGTATCGCGT	60
CBU_1887	1812588	GCCGAGAGTT	60
CBU_1894a	1817380	CACTTCCACC	60
CBU_1954	1871179	TCTTCCTCCC	60
CBU_1969	1884737	TTCTGCCTCC	60
CBU_2023	1931762	AACGCTTCCC	60
CBU_2036	1941953	GGAAGCGCAA	60
CBU_2048	1955128	GTCGTACCTC	60
CBU_2049	1956383	GGCGTCATCA	60
CBU_2052	1958783	TTAAGGCCCC	60
CBU_0054	50305	GTCGTGGAGC	70
CBU_0072	65611	AGAGGGCCCA	70
CBU_0122	111785	GGGGACTGGA	70
CBU_0207	193066	TGGGCTGAGC	70
CBU_0230	211191	GACTCGCCCA	70
CBU_0368	332398	TCCGAGGACC	70
CBU_0529	474840	AGGCACGGTC	70
CBU_0544	493270	GGGGCAGCAA	70
CBU_0572	522138	GGAGCCATCG	70
CBU_0628	572267	AGGGGGACCT	70
CBU_0652	599067	GAGCACTGCG	70
CBU_0718	665529	GGAGGCTTCC	70
CBU_0735	677415	GGGCGTCGAT	70
CBU_0742	686356	GGGCGCGTTT	70
CBU_0787	728202	AGAGGGGCCT	70
CBU_0900	850442	CTTTCGCGGG	70
CBU_0957	907098	AAGGGACGCC	70
CBU_1089	1034505	GCGCAGTCGT	70
CBU_1095	1043116	GGGCACCAGT	70
CBU_1152a	1098298	CGGCGCCAAA	70
CBU_1227	1176990	ACCGTCAGGG	70
CBU_1236	1189529	CGGAGGAACG	70
CBU_1251	1202083	CCACAACCGC	70
CBU_1282a	1234909	GCCGTGAAGG	70
CBU_1348	1297839	ACAGGGCCGA	70
CBU_1379a	1330216	GGTAGCCCGT	70
CBU_1387	1337068	GGAGGTTGCC	70
CBU_1394	1346886	GGAGGTAGCG	70
CBU_1411	1362070	CTCTGGCTGC	70
CBU_1429a	1380572	AGGGGGCGTT	70
CBU_1473	1427893	AGGGTGCACG	70
CBU_1486	1439405	CACTCCCCCA	70
CBU_1559a	1508416	CTGGACAGGC	70
CBU_1678	1611675	GGGAGGCCTT	70
CBU_1844	1773128	CGGGATTCCC	70
CBU_1888	1812658	AACTGGGCGG	70
CBU_1924	1840616	AATCCCGCCC	70
CBU_1931	1849612	TGGGCTGAGC	70
CBU_1934a	1853378	TCACCCACCC	70
CBU_1967	1882741	TCCGCGGCTT	70
CBU_1987a	1898294	TGGGCTGAGC	70
CBU_2003a	1909428	GCTCGCTACG	70
CBU_2008	1914102	CCGCCCTAAC	70
CBU_2073	1975742	GGTTGGCGGT	70
CBU_0068a	63249	ACGGGCTACG	70
CBU_0121	111773	AGGGGACTGG	70
CBU_0155	142061	AACCAGCCGC	70
CBU_0215	200316	GTGACGCCGT	70
CBU_0318	284826	GGGTCGTTCC	70
CBU_0353	320215	CGCCCACTAC	70
CBU_0363	329121	GGACGTGACG	70
CBU_0364	330686	CCTCTGGCAG	70
CBU_0426	380905	TAACCGCCGC	70
CBU_0450	396936	AGGGGGGGAA	70
CBU_0516a	458236	CGCACCTTCC	70
CBU_0563	513032	GCTCAGCCCA	70
CBU_0712	659564	CGGCTCACTC	70
CBU_0713	660873	TCCCGCCGTA	70
CBU_0734	677433	TGCCGCTCCA	70
CBU_0759	703090	GAGCTGCCTG	70
CBU_0937a	888734	CGACGCTCCA	70
CBU_1083	1028014	CCCTCAAGCC	70
CBU_1177	1119625	GGGAATCCCG	70
CBU_1180	1122535	CTTCCACGGC	70
CBU_1419	1368898	GGCAAGCTCC	70
CBU_1533	1484805	TGACGCTCCG	70
CBU_1682	1615777	AAGACCGCCC	70
CBU_1771	1704026	GTCCCGTCTC	70
CBU_1839	1769594	CAAGCGGCGT	70
CBU_1854	1782165	TCCAGCGTCG	70
CBU_1856	1784070	GACGGTCTGC	70
CBU_1902	1824367	CAGCTCGGCT	70
CBU_1950	1867700	CGCTCACTCC	70
CBU_1953	1870069	ACGGCACTCC	70
CBU_1971	1885857	TGTGGTGGCG	70
CBU_2006	1912720	GGGGGGAGAT	70
CBU_2046	1951832	GCAGTGCGCT	70
CBU_0022	21004	GCGAGCAGCC	80
CBU_0097	91430	AGGGGCAGCG	80
CBU_rnpB	103051	CCCGCCAGAG	80
CBU_0540	483661	GCGGCTGCTC	80
CBU_0906	855998	TGGGGCGGCT	80
CBU_1010	955210	GCGGCGCTGA	80
CBU_1170	1113154	GAGGCGAGCC	80
CBU_2016	1923186	AGGCCGAGGG	80
CBU_0389	353040	GGGGGACCTC	80
CBU_0469	411692	AGGGCCTCCC	80
CBU_0645	593918	GGTCAGCCCC	80
CBU_1079	1024195	GACGGCGCCT	80
CBU_1196	1141930	GATCCCGCCC	80
CBU_1276	1227035	GCCACCCTCG	80
CBU_1313	1263837	CCGGTAGGGG	80
CBU_1340	1288629	TCGTCGCCGG	80
CBU_1729	1664297	CACCCCCACG	80
CBU_0514a	455750	CGCAGGGGCG	90
CBU_0543	490170	GGGAGCGGCG	90
CBU_0560	508773	GGGGGAGGCC	90
CBU_1869	1797132	AGGGGGCCCC	90

## Sheet: Final pp(G)pp regulated
Genes down regulated	start position	-10 to TSS sequence	%GC percent				Genes up regulated	start position	-10 to TSS sequence	%GC percent
CBU_0645	593918	GGTCAGCCCC	80				CBU_2016	1923186	AGGCCGAGGG	80
CBU_1924	1840616	AATCCCGCCC	70				CBU_1839	1769594	CAAGCGGCGT	70
CBU_0735	677415	GGGCGTCGAT	70				CBU_1970	10	CTAGCGCCAG	70
CBU_0734	677433	TGCCGCTCCA	70				CBU_1971	1885857	TGTGGTGGCG	70
CBU_1343	1293274	GCAAGCTCCA	60				CBU_0675	617153	CTTGCGTCCT	60
CBU_1282	1234840	GGAGGAATGG	60				CBU_0701	651347	TCTCCGGTTG	60
CBU_1206	1150863	TTCTCGCGCA	60				CBU_1151	1096495	CCGTAGCGAA	60
CBU_1202	1145436	TAGGTGACCG	60				CBU_1331	1277933	TACGAGCAGC	60
CBU_1123	1066703	TACGGGCTAC	60				CBU_1938	1856529	CTCGAGCCTA	60
CBU_0646	594273	CGGAATCGCA	60				CBU_0379	341457	CCTTTTCTCC	50
CBU_0610	556558	TTGCGCTCAG	60				CBU_0706	655660	TCTGCTTCTC	50
CBU_1917	1836042	GAGTTGCCTT	50				CBU_0845	800445	GTTGTGGGAT	50
CBU_1708	1639188	GGAACTCCTA	50				CBU_1636	1577210	CTGTTTTCCC	50
CBU_1290	1245889	GTTCTCTTCC	50				CBU_1662	1599794	TCATCCTCGA	50
CBU_1284	1236614	GGGTATATCG	50				CBU_1767	1699560	TTACTACGCC	50
CBU_0737	679226	CCACGAAAGA	50				CBU_1846	1774579	ATACACTGCG	50
CBU_0642	591520	GGCTTGTTGT	50				CBU_1966	1882664	GTTACCTGTC	50
CBU_0491	432883	GGAGAAGAGA	50				CBU_2026	1934722	TTCATCTCCC	50
CBU_0490	432739	GGCCCTTAAA	50				CBU_0702	651484	GATAGCCGTT	50
CBU_0489	430899	GGAAGGATAG	50				CBU_0847	801866	AGAGGAAGCA	50
CBU_0299	266511	CTCTATGGGT	50				CBU_0939	889062	CGCTTAATCG	50
CBU_0275	248550	CAATAGAGGC	50				CBU_0964	915645	ATGGCAAGCT	50
CBU_0140	127015	CAGGGAGATT	50				CBU_1147	1090311	CCCTTGACTT	50
CBU_1922	1838882	CTCGCTATTA	40				CBU_1263	1213148	GAGGGGTAAT	50
CBU_1903	1824556	AATTCCACCA	40				CBU_1813	1743972	AAGGAGTTGG	50
CBU_1828	1758243	CAGGAAATGA	40				CBU_1991	1900067	GAGACTCACT	50
CBU_1720	1649719	TCGTCATAAC	40				CBU_0372	336712	GAAAATCGTC	40
CBU_1716	1646145	CCCTTAAAGA	40				CBU_1171	1113886	TCCTGGTATT	40
CBU_1471	1427343	TACAAATCCC	40				CBU_1272	1222977	AATCACTACC	40
CBU_1338	1287566	GGTTCCTTAA	40				CBU_0459	401501	GTAGTGATGT	40
CBU_1032	975188	TGGATTCTTC	40				CBU_0856	811791	GGCGTTATTT	40
CBU_1001	947921	AAGGGGTTAA	40				CBU_2024	1931840	TAGGTCATTC	40
CBU_0727	672203	TCACCTATTC	40				CBU_2030	1936877	GGATGCTTTA	40
CBU_0611	556738	TTGGGAAAAG	40				CBU_0360	326926	TTTTCTATCC	30
CBU_0056	51830	AGGCTAGTTT	40				CBU_0945	894629	TATTCAATCC	30
CBU_0030	28277	AGTTTCGCTT	40				CBU_1326	1274923	GATAGTAACA	30
CBU_1921	1838596	ATCTTTACAG	30				CBU_1386	1336986	CCTTCATATA	30
CBU_1465	1419084	AAGAGTCATT	30				CBU_1689	1624043	TTTACCACAA	30
CBU_1311	1263306	TAAACTTCCT	30				CBU_1850	1777949	AATTAAGCAG	30
CBU_1203	1146351	AGGAAATTTC	30				CBU_2070	1974431	TAAATTCTCC	30
CBU_0731	676121	TATCTCTTCA	30				CBU_0081	73564	CTAAACTTTC	30
CBU_0654	599933	GGAAATCATT	30				CBU_0111	103425	AGGTCAAATA	30
CBU_0641	591484	GGATTTTGAT	30				CBU_0671	612249	GGATAACAAT	30
CBU_0481	421033	TTATCACGAA	30				CBU_0828	777942	GGAGTAAAAA	30
CBU_0300	266649	CAGGAAATTT	30				CBU_0838	790067	GCATTTAGTA	30
CBU_0044	42116	TAGGAGATAT	30				CBU_0943	892388	ATGTCTCTAT	30
CBU_1514	1466796	CATAGATATA	20				CBU_1058	1002918	GATTTTAAGC	30
CBU_1295	1249555	AAAAAAGCTA	20				CBU_1150	1095052	AAGACTAATC	30
CBU_1138	1081098	CCATTAATTT	20				CBU_1260	1210764	GAATATCAAC	30
CBU_0297	263915	GAAGATTTTT	20				CBU_1264	1213554	TAAATGACGT	30
CBU_0168	153755	AAGAAAAGTA	20				CBU_1273	1223250	AAATAACAGC	30
CBU_0037	33276	TTATATTCTC	20				CBU_1818	1748815	GAGGTTAAAA	30
CBU_1615	1557743	TGATTATTTT	10				CBU_1978	1888985	AAATTTCGCA	30
CBU_1286	1239350	AAATATATTC	10				CBU_0101	96129	ATCTTTTCAT	20
CBU_0813	764518	ATAGTTTTTA	10				CBU_0925	875848	AACTTTTTTC	20
CBU_0488	429066	TAATTAAGAT	10				CBU_0946	895740	TTAAGGATAT	20
CBU_0296	263887	TTTAAATACT	10				CBU_1061	1006380	AATACCTTAT	20
CBU_1705	1638311	AATTAAAAAA	0				CBU_1268	1219169	AGTGATTTAA	20
CBU_0732	677149	TAAATAATAT	0				CBU_1274	1224996	TTATACATAG	20
							CBU_1973	1886449	TTTTAGAGAA	20
							CBU_0465	409709	GGATTAAATA	20
							CBU_0837	788297	TTTAGATGAT	20
							CBU_0948	897282	TTTAAAAGGA	20
							CBU_1974	1886459	TTTTTAGAGA	20
							CBU_0949	898245	TAAATTGAAT	10
							CBU_0598	545856	ATAATGAAAT	10
							CBU_1977	1889003	TTATTTTTTA	0

## Sheet: Final pp(G)pp  Cluster
Genes down regulated	start position	-10 to TSS sequence	%GC percent				Genes up regulated	start position	-10 to TSS sequence	%GC percent
CBU_0645	593918	GGTCAGCCCC	80				CBU_1970	10	CTAGCGCCAG	70
CBU_1924	1840616	AATCCCGCCC	70				CBU_1971	1885857	TGTGGTGGCG	70
CBU_0735	677415	GGGCGTCGAT	70				CBU_0701	651347	TCTCCGGTTG	60
CBU_0734	677433	TGCCGCTCCA	70				CBU_0706	655660	TCTGCTTCTC	50
CBU_1282	1234840	GGAGGAATGG	60				CBU_0702	651484	GATAGCCGTT	50
CBU_1206	1150863	TTCTCGCGCA	60				CBU_1272	1222977	AATCACTACC	40
CBU_1202	1145436	TAGGTGACCG	60				CBU_0945	894629	TATTCAATCC	30
CBU_0610	556558	TTGCGCTCAG	60				CBU_0838	790067	GCATTTAGTA	30
CBU_1708	1639188	GGAACTCCTA	50				CBU_0943	892388	ATGTCTCTAT	30
CBU_1290	1245889	GTTCTCTTCC	50				CBU_1978	1888985	AAATTTCGCA	30
CBU_1284	1236614	GGGTATATCG	50				CBU_0946	895740	TTAAGGATAT	20
CBU_0642	591520	GGCTTGTTGT	50				CBU_1268	1219169	AGTGATTTAA	20
CBU_0491	432883	GGAGAAGAGA	50				CBU_1973	1886449	TTTTAGAGAA	20
CBU_0490	432739	GGCCCTTAAA	50				CBU_0837	788297	TTTAGATGAT	20
CBU_0489	430899	GGAAGGATAG	50				CBU_0948	897282	TTTAAAAGGA	20
CBU_0299	266511	CTCTATGGGT	50				CBU_1974	1886459	TTTTTAGAGA	20
CBU_1922	1838882	CTCGCTATTA	40				CBU_0949	898245	TAAATTGAAT	10
CBU_0727	672203	TCACCTATTC	40				CBU_0598	545856	ATAATGAAAT	10
CBU_0611	556738	TTGGGAAAAG	40				CBU_1977	1889003	TTATTTTTTA	0
CBU_1921	1838596	ATCTTTACAG	30
CBU_1465	1419084	AAGAGTCATT	30
CBU_1203	1146351	AGGAAATTTC	30
CBU_0731	676121	TATCTCTTCA	30
CBU_0654	599933	GGAAATCATT	30
CBU_0641	591484	GGATTTTGAT	30
CBU_0300	266649	CAGGAAATTT	30
CBU_0297	263915	GAAGATTTTT	20
CBU_1286	1239350	AAATATATTC	10
CBU_0488	429066	TAATTAAGAT	10
CBU_0296	263887	TTTAAATACT	10
CBU_1705	1638311	AATTAAAAAA	0
CBU_0732	677149	TAAATAATAT	0

## Sheet: List of Regulated Operon
CBU_0033	operon	8	CBU_0033	hypothetical protein (NCBI)
CBU_0034	operon	8	CBU_0034	acyl carrier protein (NCBI)
CBU_0035	operon	8	CBU_0035	beta-ketoacyl synthase (NCBI)
CBU_0036	operon	8	CBU_0036	(3R)-hydroxymyristoyl-(acyl-carrier-protein) dehydratase, putative (NCBI)
CBU_0037	operon	8	fabA	3-hydroxydecanoyl-(acyl carrier protein) dehydratase (NCBI)
CBU_0168	operon	29	CBU_0168	acyl carrier protein (NCBI)
CBU_0169	operon	29	CBU_0169	hypothetical protein (RefSeq)
CBU_0295	operon	47	CBU_0295	hypothetical protein (NCBI)
CBU_0296	operon	47	pyrE	orotate phosphoribosyltransferase (RefSeq)
CBU_0598	operon	89	nudE	ADP-ribose diphosphatase NudE (RefSeq)
CBU_0599	operon	89	cysQ-1	3'(2'),5'-bisphosphate nucleotidase (NCBI)
CBU_0607	operon	90	mvaD	diphosphomevalonate decarboxylase (NCBI)
CBU_0608	operon	90	CBU_0608	phosphomevalonate kinase, putative (NCBI)
CBU_0609	operon	90	CBU_0609	mevalonate kinase, putative (NCBI)
CBU_0610	operon	90	CBU_0610	3-hydroxy-3-methylglutaryl Coenzyme A reductase (NCBI)
CBU_0644	operon	97	CBU_0644	hypothetical protein (NCBI)
CBU_0645	operon	97	CBU_0645	hypothetical protein (NCBI)
CBU_0646	operon	98	ribE	riboflavin synthase alpha chain (RefSeq)
CBU_0647	operon	98	ribA	3,4-dihydroxy-2-butanone 4-phosphate synthase domain/GTP cyclohydrolase II domain protein (RefSeq)
CBU_0648	operon	98	ribH	6,7-dimethyl-8-ribityllumazine synthase (NCBI)
CBU_0673	operon	101	CBU_0673	histidine biosynthesis bifunctional protein hisB (NCBI)
CBU_0674	operon	101	CBU_0674	SIS domain protein (RefSeq)
CBU_0675	operon	101	CBU_0675	transaldolase (NCBI)
CBU_0700	operon	106	CBU_0700	sulfate adenylyltransferase/adenylylsulfate kinase (RefSeq)
CBU_0701	operon	106	cysQ-2	3'(2'),5'-bisphosphate nucleotidase (RefSeq)
CBU_0702	operon	107	CBU_0702	oxidoreductase, short-chain dehydrogenase/reductase family (NCBI)
CBU_0703	operon	107	CBU_0703	lipopolysaccharide/O-antigen ABC transporter, permease protein, putative (NCBI)
CBU_0704	operon	107	rfbI	lipopolysaccharide/O-antigen ABC transporter, ATP-binding protein (NCBI)
CBU_0844	operon	128	CBU_0844	capsular polysaccharide biosynthesis protein (RefSeq)
CBU_0845	operon	128	CBU_0845	UDP-glucose/GDP-mannose dehydrogenase family (NCBI)
CBU_0847	operon	129	CBU_0847	3-oxoacyl-(acyl-carrier-protein) reductase (NCBI)
CBU_0848	operon	129	pgi	glucose-6-phosphate isomerase (NCBI)
CBU_0849	operon	129	galU	UTP-glucose-1-phosphate uridylyltransferase (NCBI)
CBU_0924	operon	142	CBU_0924	O-methyltransferase (NCBI)
CBU_0925	operon	142	CBU_0925	lytic murein transglycosylase, putative (NCBI)
CBU_0939	operon	146	CBU_0939	AsmA family protein (RefSeq)
CBU_0940	operon	146	mutY	A/G-specific adenine glycosylase (NCBI)
CBU_0941	operon	146	CBU_0941	hypothetical protein (NCBI)
CBU_1059	operon	164	CBU_1059	pseudouridine synthase family protein (NCBI)
CBU_1060	operon	164	scpB	segregation and condensation protein B (NCBI)
CBU_1061	operon	164	scpA	segregation and condensation protein (RefSeq)
CBU_1123	operon	174	cbpA	curved DNA-binding protein (RefSeq)
CBU_1124	operon	174	CBU_1124	hypothetical protein (NCBI)
CBU_1125	operon	174	CBU_1125	chitinase family protein, putative (RefSeq)
CBU_1136	operon	177	CBU_1136	enhanced entry protein EnhC (NCBI)
CBU_1137	operon	177	CBU_1137	enhanced entry protein EnhB, putative (NCBI)
CBU_1138	operon	177	CBU_1138	enhanced entry protein EnhA, putative (NCBI)
CBU_1147	operon	179	trmU	tRNA (5-methylaminomethyl-2-thiouridylate)-methyltransferase (RefSeq)
CBU_1148	operon	179	mfd	transcription-repair coupling factor (NCBI)
CBU_1243	operon	191	xseA	exodeoxyribonuclease VII, large subunit (NCBI)
CBU_1244	operon	191	CBU_1244	drug resistance transporter, EmrB/QacA subfamily, putative (NCBI)
CBU_1268	operon	195	CBU_1268	pyridine nucleotide-disulphide oxidoreductase (RefSeq)
CBU_1269	operon	195	CBU_1269	long chain acyl-CoA thioester hydrolase family protein (NCBI)
CBU_1274	operon	196	CBU_1274	hypothetical protein (NCBI)
CBU_1275	operon	196	RspA	starvation sensing protein rspA (NCBI)
CBU_1276	operon	196	CBU_1276	short chain dehydrogenase/reductase family oxidoreductase (RefSeq)
CBU_1281	operon	198	carB	carbamoyl-phosphate synthase, large subunit (NCBI)
CBU_1282	operon	198	carA	carbamoyl-phosphate synthase small chain (RefSeq)
CBU_1294	operon	202	CBU_1294	PIN domain protein (NCBI)
CBU_1295	operon	202	CBU_1295	hypothetical protein (NCBI)
CBU_1514	operon	235	CBU_1514	short chain dehydrogenase/reductase family oxidoreductase (RefSeq)
CBU_1515	operon	235	CBU_1515	hypothetical protein (NCBI)
CBU_1661	operon	256	rfaF	ADP-heptose--LPS heptosyltransferase II (NCBI)
CBU_1662	operon	256	CBU_1662	hypothetical protein (RefSeq)
CBU_1765	operon	274	CBU_1765	hypothetical protein (NCBI)
CBU_1766	operon	274	feoB	ferrous iron transport protein B (NCBI)
CBU_1767	operon	274	feoA	ferrous iron transport protein A (RefSeq)
CBU_1835	operon	285	CBU_1835	amine oxidase, flavin containing (NCBI)
CBU_1836	operon	285	CBU_1836	NAD(P)-dependent oxidoreductase, putative (NCBI)
CBU_1837	operon	285	CBU_1837	NAD-dependent epimerase/dehydratase family protein (RefSeq)
CBU_1838	operon	285	rfbC	dTDP-4-dehydrorhamnose 3,5-epimerase (NCBI)
CBU_1839	operon	285	CBU_1839	FAD-dependent oxidoreductase (NCBI)
CBU_1857	operon	287	CBU_1857	peptide ABC transporter, ATP-binding protein (NCBI)
CBU_1858	operon	287	CBU_1858	peptide ABC transporter, permease protein, putative (NCBI)
CBU_1859	operon	287	oppB	oligopeptide ABC transporter, permease protein (RefSeq)

## Sheet: Top 10
Top 10
Spacers
Low GC%	CBU_0866	CBU_0866	hypothetical protein (NCBI)	CBU_0867	rplI	LSU ribosomal protein L9P (RefSeq)	80
	CBU_0257	rplO	ribosomal protein L15 (NCBI)	CBU_0258	secY	preprotein translocase SecY (NCBI)	75
	CBU_0229	rplL	ribosomal protein L7/L12 (NCBI)	CBU_0230	CBU_0230	hypothetical protein (NCBI)	72.73
	CBU_0121	CBU_0121	hypothetical protein (NCBI)	CBU_0122	CBU_0122	hypothetical protein (NCBI)	70
	CBU_0303	spoT	guanosine-3,5-bis(diphosphate) 3-pyrophosphohydrolase (NCBI)	CBU_0304	CBU_0304	putative endoribonuclease L-PSP (RefSeq)	69.23
	CBU_0665	CBU_0665	hypothetical protein (NCBI)	CBU_0666	dapE	succinyl-diaminopimelate desuccinylase (NCBI)	66.67
	CBU_0162b	CBU_0162b		CBU_0165	CBU_0165	hypothetical protein (NCBI)	66.67
	CBU_0563	CBU_0563	hypothetical protein (NCBI)	CBU_0564	cutE	apolipoprotein N-acyltransferase (NCBI)	66.67
	CBU_0974	CBU_0974	acetyl-CoA C-acyltransferase (NCBI)	CBU_0975	CBU_0975	acyl-CoA biotin-dependant carboxyltransferase (RefSeq)	65.22
	CBU_1477	CBU_1477	antioxidant, AhpC/TSA family (NCBI)	CBU_1478	ahpD	alkylhydroperoxidase (RefSeq)	64.71
High GC%	CBU_1540	CBU_1540	hypothetical protein (NCBI)	CBU_1541	CBU_1541	hypothetical protein (NCBI)	6.25
	CBU_1721	CBU_1721	hypothetical protein (NCBI)	CBU_1722	CBU_1722	acyl-CoA dehydrogenase family protein (NCBI)	7.14
	CBU_1310	CBU_1310	hypothetical protein (NCBI)	CBU_1311	CBU_1311	hypothetical protein (NCBI)	8
	CBU_0953	CBU_0953	amino acid permease (RefSeq)	CBU_0954	CBU_0954	MutT/nudix family protein (NCBI)	8.57
	CBU_0986	CBU_0986	RNA methyltransferase (RefSeq)	CBU_0987	CBU_0987	rare lipoprotein A (RefSeq)	9.38
	CBU_1613	CBU_1613	hypothetical protein (NCBI)	CBU_1614	CBU_1614	hypothetical protein (NCBI)	9.68
	CBU_0407a	CBU_0407a		CBU_0409	CBU_0409	hypothetical protein (NCBI)	10
	CBU_1190	lolA	outer membrane lipoprotein carrier protein LolA (NCBI)	CBU_1191	ftsK	FtsK/SpoIIIE family protein (RefSeq)	10
	CBU_0007a	CBU_0007a	hypothetical cytosolic protein (RefSeq)	CBU_0008	CBU_0008	hypothetical protein (NCBI)	11.54
ORFs
Low GC%	CBU_1974	CBU_1974	hypothetical protein (NCBI)		17.71
	CBU_1684	CBU_1684	hypothetical protein (NCBI)		18.28
	CBU_1045a	CBU_1045a	hypothetical protein (RefSeq)		23.68
	CBU_0011	CBU_0011	hypothetical protein (NCBI)		23.81
	CBU_0900	CBU_0900	hypothetical protein (NCBI)		24.85
	CBU_0505a	CBU_0505a	hypothetical protein (RefSeq)		26.13
	CBU_0380	CBU_0380	hypothetical protein (NCBI)		26.19
	CBU_0407	CBU_0407	hypothetical protein (NCBI)		26.47
	CBU_1018	CBU_1018	hypothetical protein (NCBI)		26.89
	CBU_1427a	CBU_1427a	hypothetical protein (RefSeq)		27.35
High GC%	CBU_0057	CBU_0057	hypothetical protein (NCBI)		67.44
	CBU_0590	CBU_0590	hypothetical protein (NCBI)		62.64
	CBU_1581	CBU_1581	hypothetical protein (NCBI)		62.6
	CBU_1486	CBU_1486	hypothetical protein (NCBI)		61.9
	CBU_0217a	CBU_0217a	hypothetical protein (RefSeq)		60.28
	CBU_1348	CBU_1348	hypothetical protein (NCBI)		58.93
	CBU_1199	CBU_1199	hypothetical protein (NCBI)		58.59
	CBU_0536	CBU_0536	hypothetical protein (NCBI)		58.54
	CBU_0994	CBU_0994	hypothetical protein (NCBI)		58.33
	CBU_1824	CBU_1824	hypothetical protein (NCBI)		58.01
	CBU_0742	CBU_0742	hypothetical protein (NCBI)		57.82
	CBU_0277	CBU_0277	hypothetical protein (NCBI)		57.52
Codon 3rd
Low GC%	CBU_1974	CBU_1974	hypothetical protein (NCBI)		9.38
	CBU_1267a	scvA	ScvA (RefSeq)		16.13
	CBU_1045a	CBU_1045a	hypothetical protein (RefSeq)		18.42
	CBU_0306	CBU_0306	hypothetical protein (NCBI)		20
	CBU_1788a	CBU_1788a			20
	CBU_1378	CBU_1378	hypothetical protein (NCBI)		20.51
	CBU_1515	CBU_1515	hypothetical protein (NCBI)		20.55
	CBU_1018	CBU_1018	hypothetical protein (NCBI)		21.01
	CBU_2085	CBU_2085	hypothetical protein (NCBI)		21.21
	CBU_0168	CBU_0168	acyl carrier protein (NCBI)		21.51
High GC%	CBU_0057	CBU_0057	hypothetical protein (NCBI)		67.44
	CBU_1186b	CBU_1186b	hypothetical protein (RefSeq)		64.58
	CBU_1894	CBU_1894	hypothetical protein (NCBI)		64.52
	CBU_0292	CBU_0292			64.09
	CBU_0590	CBU_0590	hypothetical protein (NCBI)		63.79
	CBU_1199	CBU_1199	hypothetical protein (NCBI)		63.64
	CBU_1824	CBU_1824	hypothetical protein (NCBI)		63.64
	CBU_1581	CBU_1581	hypothetical protein (NCBI)		63.41
	CBU_0417	CBU_0417	hypothetical protein (RefSeq)		63.04
	CBU_1486	CBU_1486	hypothetical protein (NCBI)		62.5
pp(G)pp All
Low GC%	CBU_0354	CBU_0354	amino acid permease (RefSeq)		0
	CBU_0752a	CBU_0752a	hypothetical protein (RefSeq)		0
	CBU_0987	CBU_0987	rare lipoprotein A (RefSeq)		0
	CBU_1195	infA	translation initiation factor IF-1 (NCBI)		0
	CBU_1416	CBU_1416	S24 family peptidase (RefSeq)		0
	CBU_1618	CBU_1618	hypothetical protein (NCBI)		0
	CBU_1664	CBU_1664	CBS domain protein (NCBI)		0
	CBU_1847a	CBU_1847a			0
	CBU_0596	CBU_0596	hypothetical protein (NCBI)		0
	CBU_0732	CBU_0732	hypothetical protein (RefSeq)		0
	CBU_0936	CBU_0936	ompA-like transmembrane domain protein (NCBI)		0
	CBU_0953	CBU_0953	amino acid permease (RefSeq)		0
	CBU_1020	CBU_1020	hypothetical protein (NCBI)		0
	CBU_1041	CBU_1041	hypothetical protein (NCBI)		0
	CBU_1045a	CBU_1045a	hypothetical protein (RefSeq)		0
	CBU_1522	CBU_1522	hypothetical protein (NCBI)		0
	CBU_1613	CBU_1613	hypothetical protein (NCBI)		0
	CBU_1705	CBU_1705	hypothetical protein (RefSeq)		0
	CBU_1977	CBU_1977	phosphotransferase enzyme family protein (RefSeq)		0
High GC%	CBU_0022	CBU_0022	hypothetical protein (NCBI)		80
	CBU_0097	pssA	CDP-diacylglycerol--serineO-phosphatidyltransferase (NCBI)		80
	CBU_rnpB	rnpB	ribonuclease P RNA component (RefSeq)		80
	CBU_0540	CBU_0540	SMC family protein (NCBI)		80
	CBU_0906	CBU_0906	major facilitator family transporter (NCBI)		80
	CBU_1010	CBU_1010	hypothetical protein (RefSeq)		80
	CBU_1170	CBU_1170	hypothetical protein (NCBI)		80
	CBU_2016	CBU_2016	hypothetical cytosolic protein (RefSeq)		80
	CBU_0389	rpsT	ribosomal protein S20 (NCBI)		80
	CBU_0469	CBU_0469	hypothetical protein (NCBI)		80
	CBU_0645	CBU_0645	hypothetical protein (NCBI)		80
	CBU_1079	CBU_1079	hypothetical protein (NCBI)		80
	CBU_1196	clpA	ATP-dependent Clp protease, ATP-binding subunit ClpA (NCBI)		80
	CBU_1276	CBU_1276	short chain dehydrogenase/reductase family oxidoreductase (RefSeq)		80
	CBU_1313	CBU_1313	hypothetical protein (NCBI)		80
	CBU_1340	CBU_1340	hypothetical protein (RefSeq)		80
	CBU_1729	hemF	coproporphyrinogen III oxidase (RefSeq)		80
	CBU_0514a	CBU_0514a	hypothetical protein (RefSeq)		90
	CBU_0543	CBU_0543	hypothetical protein (NCBI)		90
	CBU_0560	CBU_0560	hypothetical protein (NCBI)		90
	CBU_1869	CBU_1869	hypothetical protein (NCBI)		90
pp(G)pp up
Low GC%	CBU_1977	CBU_1977	phosphotransferase enzyme family protein (RefSeq)	306	0
	CBU_1859	oppB	oligopeptide ABC transporter, permease protein (RefSeq)	287	10
	CBU_0949	CBU_0949	hypothetical protein (NCBI)		10
	CBU_0861	CBU_0861	hypothetical protein (RefSeq)		10
	CBU_0598	nudE	ADP-ribose diphosphatase NudE (RefSeq)	89	10
	CBU_1974	CBU_1974	hypothetical protein (NCBI)	305	20
	CBU_1973	CBU_1973	hypothetical protein (NCBI)		20
	CBU_1274	CBU_1274	hypothetical protein (NCBI)	196	20
	CBU_1268	CBU_1268	pyridine nucleotide-disulphide oxidoreductase (RefSeq)	195	20
	CBU_1243	xseA	exodeoxyribonuclease VII, large subunit (NCBI)	191	20
	CBU_1061	scpA	segregation and condensation protein (RefSeq)	164	20
	CBU_0948	CBU_0948	hypothetical protein (NCBI)		20
	CBU_0946	CBU_0946	hypothetical protein (NCBI)		20
	CBU_0925	CBU_0925	lytic murein transglycosylase, putative (NCBI)	142	20
	CBU_0837	CBU_0837	hypothetical protein (NCBI)		20
	CBU_0465	CBU_0465	hypothetical protein (NCBI)		20
	CBU_0101	nadB	L-aspartate oxidase (NCBI)		20
High GC%	CBU_2016	CBU_2016	hypothetical cytosolic protein (RefSeq)		80
	CBU_1839	CBU_1839	FAD-dependent oxidoreductase (NCBI)	285	70
	CBU_1970	dapF	diaminopimelate epimerase (NCBI)		70
	CBU_1971	CBU_1971	hypothetical protein (NCBI)		70
	CBU_0675	CBU_0675	transaldolase (NCBI)	101	60
	CBU_0701	cysQ-2	3'(2'),5'-bisphosphate nucleotidase (RefSeq)	106	60
	CBU_1151	CBU_1151	HAD superfamily hydrolase (RefSeq)		60
	CBU_1331	CBU_1331	CBS domain-containing protein (RefSeq)		60
	CBU_1938	atpI	ATP synthase F0, I subunit (RefSeq)	302	60
	CBU_0379	ampD	N-acetylmuramoyl-L-alanine amidase (NCBI)		50
	CBU_0706	CBU_0706	hypothetical protein (NCBI)		50
	CBU_0845	CBU_0845	UDP-glucose/GDP-mannose dehydrogenase family (NCBI)	128	50
	CBU_1636	CBU_1636	hypothetical protein (NCBI)		50
	CBU_1662	CBU_1662	hypothetical protein (RefSeq)	256	50
	CBU_1767	feoA	ferrous iron transport protein A (RefSeq)	274	50
	CBU_1846	CBU_1846	hypothetical protein (RefSeq)		50
	CBU_1966	hemA	glutamyl-tRNA reductase (NCBI)	304	50
	CBU_2026	CBU_2026	lipoprotein, putative (RefSeq)		50
	CBU_0702	CBU_0702	oxidoreductase, short-chain dehydrogenase/reductase family (NCBI)	107	50
	CBU_0847	CBU_0847	3-oxoacyl-(acyl-carrier-protein) reductase (NCBI)	129	50
	CBU_0939	CBU_0939	AsmA family protein (RefSeq)	146	50
	CBU_0964	CBU_0964	hypothetical protein (RefSeq)		50
	CBU_1147	trmU	tRNA (5-methylaminomethyl-2-thiouridylate)-methyltransferase (RefSeq)	179	50
	CBU_1263	CBU_1263	hypothetical protein (NCBI)		50
	CBU_1813	CBU_1813	hypothetical protein (NCBI)		50
	CBU_1991	CBU_1991	hypothetical protein (NCBI)	308	50
pp(G)pp Down
Low GC%	CBU_0732	CBU_0732	hypothetical protein (RefSeq)		0
	CBU_1705	CBU_1705	hypothetical protein (RefSeq)		0
	CBU_0296	pyrE	orotate phosphoribosyltransferase (RefSeq)	47	10
	CBU_0488	CBU_0488	serine/threonine protein phosphatase (NCBI)		10
	CBU_0813	CBU_0813	hypothetical protein (NCBI)		10
	CBU_1286	CBU_1286	hypothetical protein (NCBI)		10
	CBU_1615	CBU_1615	hypothetical protein (RefSeq)		10
	CBU_0037	fabA	3-hydroxydecanoyl-(acyl carrier protein) dehydratase (NCBI)	8	20
	CBU_0168	CBU_0168	acyl carrier protein (NCBI)	29	20
	CBU_0297	xth	exodeoxyribonuclease III (NCBI)		20
	CBU_1138	CBU_1138	enhanced entry protein EnhA, putative (NCBI)	177	20
	CBU_1295	CBU_1295	hypothetical protein (NCBI)	202	20
	CBU_1514	CBU_1514	short chain dehydrogenase/reductase family oxidoreductase (RefSeq)	235	20
High GC%	CBU_0645	CBU_0645	hypothetical protein (NCBI)	97	80
	CBU_1924	gidA	tRNA uridine 5-carboxymethylaminomethyl modification enzyme GidA (NCBI)	300	70
	CBU_0735	CBU_0735	phosphorylase family protein (NCBI)		70
	CBU_0734	CBU_0734	hypothetical protein (NCBI)		70
	CBU_1343	CBU_1343	hypothetical protein (RefSeq)		60
	CBU_1282	carA	carbamoyl-phosphate synthase small chain (RefSeq)	198	60
	CBU_1206	CBU_1206	delta(24(24(1)))-sterol reductase (RefSeq)		60
	CBU_1202	CBU_1202	hypothetical protein (NCBI)		60
	CBU_1123	cbpA	curved DNA-binding protein (RefSeq)	174	60
	CBU_0646	ribE	riboflavin synthase alpha chain (RefSeq)	98	60
	CBU_0610	CBU_0610	3-hydroxy-3-methylglutaryl Coenzyme A reductase (NCBI)	90	60
pp(G)pp Cluster up	CBU_1977	CBU_1977	phosphotransferase enzyme family protein (RefSeq)	306	0
Low GC%	CBU_0949	CBU_0949	hypothetical protein (NCBI)		10
	CBU_0598	nudE	ADP-ribose diphosphatase NudE (RefSeq)	89	10
	CBU_1974	CBU_1974	hypothetical protein (NCBI)	305	20
	CBU_1973	CBU_1973	hypothetical protein (NCBI)		20
	CBU_1268	CBU_1268	pyridine nucleotide-disulphide oxidoreductase (RefSeq)	195	20
	CBU_0948	CBU_0948	hypothetical protein (NCBI)		20
	CBU_0946	CBU_0946	hypothetical protein (NCBI)		20
	CBU_0837	CBU_0837	hypothetical protein (NCBI)		20
High GC%	CBU_1970	dapF	diaminopimelate epimerase (NCBI)		70
	CBU_1971	CBU_1971	hypothetical protein (NCBI)		70
	CBU_0701	cysQ-2	3'(2'),5'-bisphosphate nucleotidase (RefSeq)	106	60
	CBU_0706	CBU_0706	hypothetical protein (NCBI)		50
	CBU_0702	CBU_0702	oxidoreductase, short-chain dehydrogenase/reductase family (NCBI)	107	50
pp(G)pp Cluster down
Low GC%	CBU_0297	xth	exodeoxyribonuclease III (NCBI)		20
	CBU_1286	CBU_1286	hypothetical protein (NCBI)		10
	CBU_0488	CBU_0488	serine/threonine protein phosphatase (NCBI)		10
	CBU_0296	pyrE	orotate phosphoribosyltransferase (RefSeq)	47	10
	CBU_1705	CBU_1705	hypothetical protein (RefSeq)		0
	CBU_0732	CBU_0732	hypothetical protein (RefSeq)		0
High GC%	CBU_0645	CBU_0645	hypothetical protein (NCBI)	97	80
	CBU_1924	gidA	tRNA uridine 5-carboxymethylaminomethyl modification enzyme GidA (NCBI)	300	70
	CBU_0735	CBU_0735	phosphorylase family protein (NCBI)		70
	CBU_0734	CBU_0734	hypothetical protein (NCBI)		70
	CBU_1282	carA	carbamoyl-phosphate synthase small chain (RefSeq)	198	60
	CBU_1206	CBU_1206	delta(24(24(1)))-sterol reductase (RefSeq)		60
	CBU_1202	CBU_1202	hypothetical protein (NCBI)		60
	CBU_0610	CBU_0610	3-hydroxy-3-methylglutaryl Coenzyme A reductase (NCBI)	90	60
	CBU_1708	sodB	superoxide dismutase (fe) (NCBI)	263	50
	CBU_1290	dnaK	chaperone protein dnak (NCBI)	200	50
	CBU_1284	CBU_1284	hypothetical protein (NCBI)	199	50
	CBU_0642	CBU_0642	glycerophosphoryl diester phosphodiesterase, putative (NCBI)	96	50
	CBU_0491	rpmF	ribosomal protein L32 (NCBI)	72	50
	CBU_0490	CBU_0490	DNA polymerase X family/PHP domain-containing protein (RefSeq)		50
	CBU_0489	CBU_0489	phospholipase A, putative (NCBI)		50
	CBU_0299	rph	ribonuclease PH (RefSeq)	48	50

## Sheet: Summary
	Genome	ORF	Spacer	Codon			pp(G)pp promoter regions
							All	Regulated		Clusters
				1st	2nd	3rd		Up	Down	Up	Down
Sequences analyzed	1	2015	1323	2015	2015	2015	1327	70	59	19	32
GC% Mean	42	42.8257	39.5656	49.6567	37.6995	41.121	39.1635	37.1429	38.9831	31.5789	40.9375
SD GC%	-	4.85	9.415	6.89628	5.5318	6.73148	17.1888	16.7802	18.2601	20.073	21.0007
CG% Mean + 1SD		275	184			276	490	26	23	5	16
CG% Mean + 2SD		34	31			39	238	9	11	3	8
CG% Mean + 3SD		12	5			16	98	4	4	2	4
CG% Mean - 1SD		292	186			288	561	17	13	9	6
CG% Mean - 2SD		62	40			58	277	5	7	3	5
CG% Mean - 3SD		11	8			7	105	1	2	1	2
